# Supplementary material for: Genetic isolation and metabolic complexity of an Antarctic subglacial microbiome
Source: Research Square preprint supplement (doi:10.21203/rs.3.rs-4392950/v1), 2024-05-30
Supplement: Supplementary file 1 [file 79ba2a2337b604ee92fe9920.xlsx]

## Sheet: Table S1
Supplementary Table 1. Genome statistics of 1,374 single cell genomes.
SAG Name	Water pore size OR Sediment depth	Biosample Accession	Genome Acession	# of raw read pairs (Illumina)	# of trimmed read pairs	# of read pairs after removing reads of low sequence complex	# of remaining read pairs after removing human contaminants	# of the remaining read pairs after digital normalization (Kmer)	Observed genome size in bp	Read coverage (x)	# contigs	Longest contig in bp	N50 (bp)	G+C content	CheckM completeness (%)	CheckM contamination (%)	# predicted genes	Coding density	GTDB-Tk classification	Estimated Genome size (bp) = observed genome size divided by CheckM completeness	Revised GTDB-Tk classification referring FastTree	Assembly accesion of the closest GTDB genome	Genomic average nucleotide identity with the closest GTDB genome	the proportion of a SAG aligned with the closest GTDB genome	Presence or absence of near complete 16S rRNA genes (>1,000 bp)
SLM_LV1_30a-A21	>3.0 um	SAMN40273878	JBCJLU000000000	8241154	7696969	7676079	7676015	94620	206304	68.1073	44	15698	5032	0.322282	14.9365	1.94175	306	0.883657	d__Archaea;p__Thermoproteota;c__Nitrososphaeria;o__Nitrososphaerales;f__Nitrosopumilaceae;g__Nitrosarchaeum;s__	1.38121e+06	d__Archaea;p__Thermoproteota;c__Nitrososphaeria;o__Nitrososphaerales;f__Nitrosopumilaceae;g__Nitrosarchaeum;s__	GCA_009697485.1	85.5802	0.38	Absence
SLM_LV1_30a-F17	>3.0 um	SAMN40273879	JBCJLV000000000	8108164	7660469	7639102	7638826	78913	193110	61.6203	45	9514	4616	0.315302	20.5502	0	301	0.880281	d__Archaea;p__Thermoproteota;c__Nitrososphaeria;o__Nitrososphaerales;f__Nitrosopumilaceae;g__Nitrosarchaeum;s__	939701	d__Archaea;p__Thermoproteota;c__Nitrososphaeria;o__Nitrososphaerales;f__Nitrosopumilaceae;g__Nitrosarchaeum;s__	GCA_016234975.1	85.8853	0.61	Absence
SLM_LV1_0208-F17	0.2~0.8 um	SAMN40273880	JBCJLW000000000	7777467	7395108	7386206	7386174	191022	423737	74.675	55	21798	9812	0.325067	22.8155	0.970874	575	0.877712	d__Archaea;p__Thermoproteota;c__Nitrososphaeria;o__Nitrososphaerales;f__Nitrosopumilaceae;g__Nitrosarchaeum;s__	1.85723e+06	d__Archaea;p__Thermoproteota;c__Nitrososphaeria;o__Nitrososphaerales;f__Nitrosopumilaceae;g__Nitrosarchaeum;s__	GCA_003569705.1	85.5457	0.78	Absence
SLM_LV1_0830-N07	0.8~3.0 um	SAMN40273881	JBCJLX000000000	8831705	8379581	8360885	8360845	168427	395624	69.9842	73	18481	7372	0.32042	22.0438	0.485437	558	0.866558	d__Archaea;p__Thermoproteota;c__Nitrososphaeria;o__Nitrososphaerales;f__Nitrosopumilaceae;g__Nitrosarchaeum;s__	1.79472e+06	d__Archaea;p__Thermoproteota;c__Nitrososphaeria;o__Nitrososphaerales;f__Nitrosopumilaceae;g__Nitrosarchaeum;s__	GCA_003569705.1	85.638	0.73	Absence
SLM_LV1_0830-G05	0.8~3.0 um	SAMN40273882	JBCJLY000000000	8648841	7979053	7974288	7974011	83089	213431	63.7173	40	16892	5648	0.331348	11.2024	0	321	0.83054	d__Archaea;p__Thermoproteota;c__Nitrososphaeria;o__Nitrososphaerales;f__Nitrosopumilaceae;g__Nitrosarchaeum;s__	1.90523e+06	d__Archaea;p__Thermoproteota;c__Nitrososphaeria;o__Nitrososphaerales;f__Nitrosopumilaceae;g__Nitrosarchaeum;s__	GCA_003569705.1	87.8339	0.68	Absence
SLM_LV1_02b-F20	<0.2 um	SAMN40273883	JBCJLZ000000000	8775576	8295858	8289232	8289226	132212	304658	75.4526	25	33607	17417	0.378342	26.7913	0	361	0.918466	d__Archaea;p__Nanoarchaeota;c__Nanoarchaeia;o__Pacearchaeales;f__GW2011-AR1;g__;s__	1.13715e+06	d__Archaea;p__Nanoarchaeota;c__Nanoarchaeia;o__Pacearchaeales;f__GW2011-AR1;g__;s__				Absence
SLM_LV1_02b-G20	<0.2 um	SAMN40273884	JBCJMA000000000	8368394	7913018	7570813	7570805	143163	319998	79.9962	31	35067	15657	0.290458	17.4455	0	376	0.895115	d__Archaea;p__Nanoarchaeota;c__Nanoarchaeia;o__Pacearchaeales;f__GW2011-AR1;g__;s__	1.83427e+06	d__Archaea;p__Nanoarchaeota;c__Nanoarchaeia;o__Pacearchaeales;f__GW2011-AR1;g__;s__	GCF_003640545.1	77.0055	0.04	Absence
SLM_MC1B_68-F19	6~8 cm	SAMN40273885	JBCJMB000000000	8522275	8133907	8115675	8115659	233206	554716	73.8997	42	61968	19274	0.672423	20.977	0	641	0.891983	d__Bacteria;p__Actinobacteriota;c__Thermoleophilia;o__Miltoncostaeales;f__Miltoncostaeaceae;g__SYFI01;s__	2.6444e+06	d__Bacteria;p__Actinobacteriota;c__Thermoleophilia;o__Miltoncostaeales;f__Miltoncostaeaceae;g__SYFI01;s__	GCA_001830475.1	81.96	0.01	Absence
SLM_MC1B_68-C22	6~8 cm	SAMN40273886	JBCJMC000000000	9598194	9224978	9194980	9194494	408433	1158388	63.0789	97	63118	19037	0.672042	42.0977	0	1303	0.886912	d__Bacteria;p__Actinobacteriota;c__Thermoleophilia;o__Miltoncostaeales;f__Miltoncostaeaceae;g__SYFI01;s__	2.75167e+06	d__Bacteria;p__Actinobacteriota;c__Thermoleophilia;o__Miltoncostaeales;f__Miltoncostaeaceae;g__SYFI01;s__	GCA_011390985.1	82.3983	0	Absence
SLM_LV1_BS-L10	BulkSediment	SAMN40273887	JBCJMD000000000	10121180	9601939	9582809	9582799	433778	1063118	72.8477	88	44114	15805	0.674732	48.3477	0	1194	0.899669	d__Bacteria;p__Actinobacteriota;c__Thermoleophilia;o__Miltoncostaeales;f__Miltoncostaeaceae;g__SYFI01;s__	2.1989e+06	d__Bacteria;p__Actinobacteriota;c__Thermoleophilia;o__Miltoncostaeales;f__Miltoncostaeaceae;g__SYFI01;s__	GCA_004010535.1	83.4683	0.01	Presence
SLM_MC1B_68-A08	6~8 cm	SAMN40273888	JBCJME000000000	11702309	11131924	11106285	11106281	408713	1014300	68.6975	109	43280	13236	0.67268	51.408	0	1154	0.896949	d__Bacteria;p__Actinobacteriota;c__Thermoleophilia;o__Miltoncostaeales;f__Miltoncostaeaceae;g__SYFI01;s__	1.97304e+06	d__Bacteria;p__Actinobacteriota;c__Thermoleophilia;o__Miltoncostaeales;f__Miltoncostaeaceae;g__SYFI01;s__	GCA_017882825.1	82.01	0	Absence
SLM_MC1B_68-J14	6~8 cm	SAMN40273889	JBCJMF000000000	8023731	7578181	7569908	7569905	138202	371867	64.4281	33	45328	22104	0.669551	27.5862	0	419	0.901462	d__Bacteria;p__Actinobacteriota;c__Thermoleophilia;o__Miltoncostaeales;f__Miltoncostaeaceae;g__SYFI01;s__	1.34802e+06	d__Bacteria;p__Actinobacteriota;c__Thermoleophilia;o__Miltoncostaeales;f__Miltoncostaeaceae;g__SYFI01;s__	GCA_903866425.1	81.3854	0.43	Absence
SLM_MC1B_68-N07	6~8 cm	SAMN40273890	JBCJMG000000000	8061171	7630351	7614796	7614791	545732	1347816	71.732	111	77710	19157	0.67209	52.4425	0	1497	0.887188	d__Bacteria;p__Actinobacteriota;c__Thermoleophilia;o__Miltoncostaeales;f__Miltoncostaeaceae;g__SYFI01;s__	2.57008e+06	d__Bacteria;p__Actinobacteriota;c__Thermoleophilia;o__Miltoncostaeales;f__Miltoncostaeaceae;g__SYFI01;s__	GCA_002843005.1	88.1822	0.01	Presence
SLM_MC1B_24-N23	2~4 cm	SAMN40273891	JBCJMH000000000	8519266	8134628	8117513	8117330	388203	1018256	65.9913	91	47543	16935	0.672785	50	0	1147	0.889067	d__Bacteria;p__Actinobacteriota;c__Thermoleophilia;o__Miltoncostaeales;f__Miltoncostaeaceae;g__SYFI01;s__	2036512	d__Bacteria;p__Actinobacteriota;c__Thermoleophilia;o__Miltoncostaeales;f__Miltoncostaeaceae;g__SYFI01;s__	GCF_014652335.1	83.4811	0.01	Presence
SLM_MC1B_68-L19	6~8 cm	SAMN40273892	JBCJMI000000000	9431611	8980413	8971447	8971439	424504	1151696	66.0798	102	56908	17054	0.671791	51.7241	0	1312	0.888295	d__Bacteria;p__Actinobacteriota;c__Thermoleophilia;o__Miltoncostaeales;f__Miltoncostaeaceae;g__SYFI01;s__	2.22661e+06	d__Bacteria;p__Actinobacteriota;c__Thermoleophilia;o__Miltoncostaeales;f__Miltoncostaeaceae;g__SYFI01;s__	GCF_005771525.1	85.6814	0	Presence
SLM_MC1B_68-G09	6~8 cm	SAMN40273893	JBCJMJ000000000	7402066	7005380	6998830	6998827	181028	443779	74.5219	38	45028	23352	0.673984	24.1379	0	505	0.888733	d__Bacteria;p__Actinobacteriota;c__Thermoleophilia;o__Miltoncostaeales;f__Miltoncostaeaceae;g__SYFI01;s__	1.83851e+06	d__Bacteria;p__Actinobacteriota;c__Thermoleophilia;o__Miltoncostaeales;f__Miltoncostaeaceae;g__SYFI01;s__	GCA_903866425.1	80.7559	0.39	Absence
SLM_MC1B_68-L14	6~8 cm	SAMN40273894	JBCJMK000000000	7628659	7247441	7239275	7239243	288636	881177	60.4337	74	47229	18021	0.672304	33.7069	1.72414	1013	0.879277	d__Bacteria;p__Actinobacteriota;c__Thermoleophilia;o__Miltoncostaeales;f__Miltoncostaeaceae;g__SYFI01;s__	2.61423e+06	d__Bacteria;p__Actinobacteriota;c__Thermoleophilia;o__Miltoncostaeales;f__Miltoncostaeaceae;g__SYFI01;s__	GCA_009694475.1	89.2178	0.01	Presence
SLM_MC1B_68-G22	6~8 cm	SAMN40273895	JBCJML000000000	7616914	7247759	7240505	7240501	356174	996413	63.1091	96	53095	17774	0.673793	25.8621	0	1136	0.885715	d__Bacteria;p__Actinobacteriota;c__Thermoleophilia;o__Miltoncostaeales;f__Miltoncostaeaceae;g__SYFI01;s__	3.8528e+06	d__Bacteria;p__Actinobacteriota;c__Thermoleophilia;o__Miltoncostaeales;f__Miltoncostaeaceae;g__SYFI01;s__	GCF_900105025.1	85.9168	0.03	Presence
SLM_MC1B_810-C20	8~10 cm	SAMN40273896	JBCJMM000000000	7256052	6832549	6813247	6813215	587832	1448794	70.2659	127	48570	17331	0.674003	57.8305	0	1635	0.892735	d__Bacteria;p__Actinobacteriota;c__Thermoleophilia;o__Miltoncostaeales;f__Miltoncostaeaceae;g__SYFI01;s__	2.50524e+06	d__Bacteria;p__Actinobacteriota;c__Thermoleophilia;o__Miltoncostaeales;f__Miltoncostaeaceae;g__SYFI01;s__	GCF_000786695.1	82.01	0	Presence
SLM_MC1B_46-K21	4~6 cm	SAMN40273897	JBCJMN000000000	8830558	8135076	8114498	8114437	225100	567718	62.4882	51	41228	14778	0.671219	20.6897	0	651	0.888397	d__Bacteria;p__Actinobacteriota;c__Thermoleophilia;o__Miltoncostaeales;f__Miltoncostaeaceae;g__SYFI01;s__	2.74397e+06	d__Bacteria;p__Actinobacteriota;c__Thermoleophilia;o__Miltoncostaeales;f__Miltoncostaeaceae;g__SYFI01;s__	GCA_903866425.1	80.4232	0.4	Absence
SLM_MC1B_68-O14	6~8 cm	SAMN40273898	JBCJMO000000000	10029376	9497116	9469069	9468722	392229	953236	72.7673	81	55668	18479	0.67141	41.3506	0	1083	0.886218	d__Bacteria;p__Actinobacteriota;c__Thermoleophilia;o__Miltoncostaeales;f__Miltoncostaeaceae;g__SYFI01;s__	2.30525e+06	d__Bacteria;p__Actinobacteriota;c__Thermoleophilia;o__Miltoncostaeales;f__Miltoncostaeaceae;g__SYFI01;s__	GCA_903866425.1	81.1957	0.39	Absence
SLM_MC1B_68-P18	6~8 cm	SAMN40273899	JBCJMP000000000	7096066	6647622	6634691	6634678	706485	1630289	75.4475	121	54081	20096	0.672862	74.569	0	1801	0.892623	d__Bacteria;p__Actinobacteriota;c__Thermoleophilia;o__Miltoncostaeales;f__Miltoncostaeaceae;g__SYFI01;s__	2.18628e+06	d__Bacteria;p__Actinobacteriota;c__Thermoleophilia;o__Miltoncostaeales;f__Miltoncostaeaceae;g__SYFI01;s__	GCF_000993825.1	83.7406	0	Presence
SLM_MC1B_68-I21	6~8 cm	SAMN40273900	JBCJMQ000000000	7201177	6858728	6853691	6853552	133398	345830	66.8117	27	48745	20566	0.672154	15.5172	0	399	0.880094	d__Bacteria;p__Actinobacteriota;c__Thermoleophilia;o__Miltoncostaeales;f__Miltoncostaeaceae;g__SYFI01;s__	2.22868e+06	d__Bacteria;p__Actinobacteriota;c__Thermoleophilia;o__Miltoncostaeales;f__Miltoncostaeaceae;g__SYFI01;s__	GCA_903866425.1	81.6792	0.42	Absence
SLM_MC1B_68-M13	6~8 cm	SAMN40273901	JBCJMR000000000	8251078	7818302	7805751	7805743	408544	1092080	66.0979	101	54151	15355	0.670965	53.2184	0.143678	1251	0.894193	d__Bacteria;p__Actinobacteriota;c__Thermoleophilia;o__Miltoncostaeales;f__Miltoncostaeaceae;g__SYFI01;s__	2.05207e+06	d__Bacteria;p__Actinobacteriota;c__Thermoleophilia;o__Miltoncostaeales;f__Miltoncostaeaceae;g__SYFI01;s__	GCA_903866425.1	80.9215	0.42	Presence
SLM_MC1B_68-M05	6~8 cm	SAMN40273902	JBCJMS000000000	8276421	7847278	7834232	7834211	576596	1448251	71.4254	113	64699	25212	0.672104	59.9138	0	1619	0.888395	d__Bacteria;p__Actinobacteriota;c__Thermoleophilia;o__Miltoncostaeales;f__Miltoncostaeaceae;g__SYFI01;s__	2.41722e+06	d__Bacteria;p__Actinobacteriota;c__Thermoleophilia;o__Miltoncostaeales;f__Miltoncostaeaceae;g__SYFI01;s__	GCF_007954585.1	83.5297	0.02	Presence
SLM_MC1B_68-D03	6~8 cm	SAMN40273903	JBCJMT000000000	12175237	11507628	11483543	11482905	482492	1210716	69.2372	97	53980	16808	0.675826	51.8103	0	1326	0.901545	d__Bacteria;p__Actinobacteriota;c__Thermoleophilia;o__Miltoncostaeales;f__Miltoncostaeaceae;g__SYFI01;s__	2.33682e+06	d__Bacteria;p__Actinobacteriota;c__Thermoleophilia;o__Miltoncostaeales;f__Miltoncostaeaceae;g__SYFI01;s__	GCA_903866425.1	80.9402	0.47	Absence
SLM_MC1B_68-N11	6~8 cm	SAMN40273904	JBCJMU000000000	9249974	8768354	8754579	8754578	507123	1229849	73.8616	92	80277	17334	0.674902	53.4483	0	1394	0.891503	d__Bacteria;p__Actinobacteriota;c__Thermoleophilia;o__Miltoncostaeales;f__Miltoncostaeaceae;g__SYFI01;s__	2.30101e+06	d__Bacteria;p__Actinobacteriota;c__Thermoleophilia;o__Miltoncostaeales;f__Miltoncostaeaceae;g__SYFI01;s__	GCA_002843005.1	88.1118	0.01	Presence
SLM_MC1B_68-L11	6~8 cm	SAMN40273905	JBCJMV000000000	7361183	6977096	6961259	6961249	312102	884495	61.1612	95	47071	15218	0.671654	29.8851	4.02299	989	0.889205	d__Bacteria;p__Actinobacteriota;c__Thermoleophilia;o__Miltoncostaeales;f__Miltoncostaeaceae;g__SYFI01;s__	2.95966e+06	d__Bacteria;p__Actinobacteriota;c__Thermoleophilia;o__Miltoncostaeales;f__Miltoncostaeaceae;g__SYFI01;s__	GCA_003136295.1	84.5888	0	Presence
SLM_MC1B_68-J06	6~8 cm	SAMN40273906	JBCJMW000000000	10144955	9615647	9574197	9574194	436699	1172258	67.1054	95	57154	18039	0.673357	50.2874	0	1352	0.889012	d__Bacteria;p__Actinobacteriota;c__Thermoleophilia;o__Miltoncostaeales;f__Miltoncostaeaceae;g__SYFI01;s__	2.33112e+06	d__Bacteria;p__Actinobacteriota;c__Thermoleophilia;o__Miltoncostaeales;f__Miltoncostaeaceae;g__SYFI01;s__	GCF_001642025.1	84.9874	0.01	Presence
SLM_MC1B_68-O09	6~8 cm	SAMN40273907	JBCJMX000000000	11605756	11167374	11155862	11155843	226586	566752	72.0125	37	62283	26376	0.671407	13.7931	0	653	0.889258	d__Bacteria;p__Actinobacteriota;c__Thermoleophilia;o__Miltoncostaeales;f__Miltoncostaeaceae;g__SYFI01;s__	4.10895e+06	d__Bacteria;p__Actinobacteriota;c__Thermoleophilia;o__Miltoncostaeales;f__Miltoncostaeaceae;g__SYFI01;s__	GCA_903866425.1	81.6839	0.4	Absence
SLM_MC1B_68-N09	6~8 cm	SAMN40273908	JBCJMY000000000	9598080	9198922	9188314	9188264	487541	1258034	68.2942	127	48531	14756	0.674219	56.3362	0	1440	0.885915	d__Bacteria;p__Actinobacteriota;c__Thermoleophilia;o__Miltoncostaeales;f__Miltoncostaeaceae;g__SYFI01;s__	2.23308e+06	d__Bacteria;p__Actinobacteriota;c__Thermoleophilia;o__Miltoncostaeales;f__Miltoncostaeaceae;g__SYFI01;s__	GCA_002843005.1	85.0961	0.01	Presence
SLM_LV1_BS-E06	BulkSediment	SAMN40273909	JBCJMZ000000000	8985178	8573186	8569261	8569246	285918	826398	60.0828	74	31510	16738	0.671221	43.8218	1.72414	975	0.878629	d__Bacteria;p__Actinobacteriota;c__Thermoleophilia;o__Miltoncostaeales;f__Miltoncostaeaceae;g__SYFI01;s__	1.88581e+06	d__Bacteria;p__Actinobacteriota;c__Thermoleophilia;o__Miltoncostaeales;f__Miltoncostaeaceae;g__SYFI01;s__	GCA_014804965.1	84.613	0	Presence
SLM_MC1B_68-L03	6~8 cm	SAMN40273910	JBCJNA000000000	9249077	8747319	8736210	8736170	394513	1005179	69.4071	90	80915	17727	0.673447	42.1695	0	1122	0.89445	d__Bacteria;p__Actinobacteriota;c__Thermoleophilia;o__Miltoncostaeales;f__Miltoncostaeaceae;g__SYFI01;s__	2.38366e+06	d__Bacteria;p__Actinobacteriota;c__Thermoleophilia;o__Miltoncostaeales;f__Miltoncostaeaceae;g__SYFI01;s__	GCF_008801605.1	84.7353	0.01	Presence
SLM_MC1B_68-L13	6~8 cm	SAMN40273911	JBCJNB000000000	10095230	9640984	9628900	9628816	399067	1016711	69.4245	87	66643	14284	0.67308	54.8851	0	1155	0.892729	d__Bacteria;p__Actinobacteriota;c__Thermoleophilia;o__Miltoncostaeales;f__Miltoncostaeaceae;g__SYFI01;s__	1.85244e+06	d__Bacteria;p__Actinobacteriota;c__Thermoleophilia;o__Miltoncostaeales;f__Miltoncostaeaceae;g__SYFI01;s__	GCF_001815985.1	81.4617	0.01	Presence
SLM_MC1B_68-E03	6~8 cm	SAMN40273912	JBCJNC000000000	9623631	9017148	8999823	8999801	524972	1421487	63.505	126	53542	16637	0.673646	73.4195	0	1595	0.893331	d__Bacteria;p__Actinobacteriota;c__Thermoleophilia;o__Miltoncostaeales;f__Miltoncostaeaceae;g__SYFI01;s__	1.93612e+06	d__Bacteria;p__Actinobacteriota;c__Thermoleophilia;o__Miltoncostaeales;f__Miltoncostaeaceae;g__SYFI01;s__	GCA_019112625.1	82.3452	0.01	Presence
SLM_MC1B_68-B05	6~8 cm	SAMN40273913	JBCJND000000000	9350656	8797792	8772018	8771913	414110	1093628	64.8439	103	54135	14774	0.674051	48.7069	0	1217	0.891248	d__Bacteria;p__Actinobacteriota;c__Thermoleophilia;o__Miltoncostaeales;f__Miltoncostaeaceae;g__SYFI01;s__	2.24532e+06	d__Bacteria;p__Actinobacteriota;c__Thermoleophilia;o__Miltoncostaeales;f__Miltoncostaeaceae;g__SYFI01;s__	GCA_900548615.1	82.1882	0.01	Presence
SLM_MC1B_46-G09	4~6 cm	SAMN40273914	JBCJNE000000000	11008666	10431269	10423767	10423760	264398	837678	56.2199	75	48743	18304	0.674193	42.342	0	910	0.895158	d__Bacteria;p__Actinobacteriota;c__Thermoleophilia;o__Miltoncostaeales;f__Miltoncostaeaceae;g__SYFI01;s__	1.97836e+06	d__Bacteria;p__Actinobacteriota;c__Thermoleophilia;o__Miltoncostaeales;f__Miltoncostaeaceae;g__SYFI01;s__	GCA_903866425.1	81.315	0.36	Absence
SLM_MC1B_68-E19	6~8 cm	SAMN40273915	JBCJNF000000000	8106189	7673153	7662946	7662933	366888	938580	68.6583	74	56950	21462	0.674305	20.6897	0	1083	0.886894	d__Bacteria;p__Actinobacteriota;c__Thermoleophilia;o__Miltoncostaeales;f__Miltoncostaeaceae;g__SYFI01;s__	4.53647e+06	d__Bacteria;p__Actinobacteriota;c__Thermoleophilia;o__Miltoncostaeales;f__Miltoncostaeaceae;g__SYFI01;s__	GCA_903866425.1	80.3197	0.44	Absence
SLM_MC1B_68-F05	6~8 cm	SAMN40273916	JBCJNG000000000	8095092	7722714	7714497	7714493	520999	1398606	66.4313	112	41613	20226	0.672932	65.5891	0	1588	0.885057	d__Bacteria;p__Actinobacteriota;c__Thermoleophilia;o__Miltoncostaeales;f__Miltoncostaeaceae;g__SYFI01;s__	2.13238e+06	d__Bacteria;p__Actinobacteriota;c__Thermoleophilia;o__Miltoncostaeales;f__Miltoncostaeaceae;g__SYFI01;s__	GCF_000234355.1	84.548	0.01	Absence
SLM_MC1B_68-I05	6~8 cm	SAMN40273917	JBCJNH000000000	6731998	6395568	6386527	6386316	482768	1183573	72.765	107	43646	16014	0.672956	56.055	0	1367	0.887155	d__Bacteria;p__Actinobacteriota;c__Thermoleophilia;o__Miltoncostaeales;f__Miltoncostaeaceae;g__SYFI01;s__	2.11145e+06	d__Bacteria;p__Actinobacteriota;c__Thermoleophilia;o__Miltoncostaeales;f__Miltoncostaeaceae;g__SYFI01;s__	GCA_019115265.1	81.5699	0	Presence
SLM_MC1B_24-K18	2~4 cm	SAMN40273918	JBCJNI000000000	8519946	8050337	8036930	8036848	272544	697171	67.2616	68	87804	15460	0.674559	40.9195	0	802	0.885044	d__Bacteria;p__Actinobacteriota;c__Thermoleophilia;o__Miltoncostaeales;f__Miltoncostaeaceae;g__SYFI01;s__	1.70376e+06	d__Bacteria;p__Actinobacteriota;c__Thermoleophilia;o__Miltoncostaeales;f__Miltoncostaeaceae;g__SYFI01;s__	GCA_011682695.1	87.5057	0.01	Presence
SLM_MC1B_68-D15	6~8 cm	SAMN40273919	JBCJNJ000000000	10020663	9448078	9436565	9436558	591178	1462005	71.2232	109	82306	21570	0.674806	76.6523	0	1634	0.893582	d__Bacteria;p__Actinobacteriota;c__Thermoleophilia;o__Miltoncostaeales;f__Miltoncostaeaceae;g__SYFI01;s__	1.90732e+06	d__Bacteria;p__Actinobacteriota;c__Thermoleophilia;o__Miltoncostaeales;f__Miltoncostaeaceae;g__SYFI01;s__	GCA_000063525.1	81.7575	0.01	Presence
SLM_MC1B_46-F10	4~6 cm	SAMN40273920	JBCJNK000000000	11516505	10855399	10843224	10843199	655443	1720362	67.4228	146	61572	18689	0.675141	76.2931	0	1938	0.894429	d__Bacteria;p__Actinobacteriota;c__Thermoleophilia;o__Miltoncostaeales;f__Miltoncostaeaceae;g__SYFI01;s__	2.25494e+06	d__Bacteria;p__Actinobacteriota;c__Thermoleophilia;o__Miltoncostaeales;f__Miltoncostaeaceae;g__SYFI01;s__	GCA_004554585.1	81.4349	0.01	Absence
SLM_MC1B_24-P10	2~4 cm	SAMN40273921	JBCJNL000000000	7106049	6796189	6786311	6786303	619413	1581566	70.4744	105	105774	21942	0.673312	72.8448	0	1757	0.89725	d__Bacteria;p__Actinobacteriota;c__Thermoleophilia;o__Miltoncostaeales;f__Miltoncostaeaceae;g__SYFI01;s__	2.17114e+06	d__Bacteria;p__Actinobacteriota;c__Thermoleophilia;o__Miltoncostaeales;f__Miltoncostaeaceae;g__SYFI01;s__	GCF_900638585.1	83.8975	0.01	Presence
SLM_MC1B_68-P10	6~8 cm	SAMN40273922	JBCJNM000000000	6848809	6411712	6397716	6397704	326399	759155	74.2057	61	53710	23383	0.672225	38.7931	0	868	0.887222	d__Bacteria;p__Actinobacteriota;c__Thermoleophilia;o__Miltoncostaeales;f__Miltoncostaeaceae;g__SYFI01;s__	1.95693e+06	d__Bacteria;p__Actinobacteriota;c__Thermoleophilia;o__Miltoncostaeales;f__Miltoncostaeaceae;g__SYFI01;s__	GCF_900105025.1	86.2673	0.01	Presence
SLM_MC1B_68-L22	6~8 cm	SAMN40273923	JBCJNN000000000	12066668	11380344	11366546	11366511	326920	859712	66.6717	95	35880	13939	0.673403	48.2759	0	982	0.882162	d__Bacteria;p__Actinobacteriota;c__Thermoleophilia;o__Miltoncostaeales;f__Miltoncostaeaceae;g__SYFI01;s__	1.78083e+06	d__Bacteria;p__Actinobacteriota;c__Thermoleophilia;o__Miltoncostaeales;f__Miltoncostaeaceae;g__SYFI01;s__	GCF_017368795.1	85.25	0.02	Presence
SLM_MC1B_68-B04	6~8 cm	SAMN40273924	JBCJNO000000000	13278834	12651280	12642703	12642621	350927	1060503	57.0475	94	50100	16068	0.671438	45.5172	0	1220	0.887345	d__Bacteria;p__Actinobacteriota;c__Thermoleophilia;o__Miltoncostaeales;f__Miltoncostaeaceae;g__SYFI01;s__	2.32989e+06	d__Bacteria;p__Actinobacteriota;c__Thermoleophilia;o__Miltoncostaeales;f__Miltoncostaeaceae;g__SYFI01;s__	GCA_016781725.1	81.5427	0.01	Absence
SLM_MC1B_68-K04	6~8 cm	SAMN40273925	JBCJNP000000000	8096449	7692549	7663088	7663087	297173	712772	72.3549	85	44656	11707	0.671254	36.6379	0.862069	855	0.894644	d__Bacteria;p__Actinobacteriota;c__Thermoleophilia;o__Miltoncostaeales;f__Miltoncostaeaceae;g__SYFI01;s__	1.94545e+06	d__Bacteria;p__Actinobacteriota;c__Thermoleophilia;o__Miltoncostaeales;f__Miltoncostaeaceae;g__SYFI01;s__	GCA_000759445.1	83.5211	0.01	Presence
SLM_MC1B_24-M16	2~4 cm	SAMN40273926	JBCJNQ000000000	7973061	7448828	7404219	7404052	285086	699984	72.294	55	46750	21953	0.672975	26.7241	0.862069	788	0.89353	d__Bacteria;p__Actinobacteriota;c__Thermoleophilia;o__Miltoncostaeales;f__Miltoncostaeaceae;g__SYFI01;s__	2.61929e+06	d__Bacteria;p__Actinobacteriota;c__Thermoleophilia;o__Miltoncostaeales;f__Miltoncostaeaceae;g__SYFI01;s__	GCF_011302055.1	81.2767	0	Absence
SLM_MC1B_68-E10	6~8 cm	SAMN40273927	JBCJNR000000000	9614996	9198621	9192010	9191912	274848	738702	67.2841	44	90207	27829	0.672604	30	0	817	0.901273	d__Bacteria;p__Actinobacteriota;c__Thermoleophilia;o__Miltoncostaeales;f__Miltoncostaeaceae;g__SYFI01;s__	2.46234e+06	d__Bacteria;p__Actinobacteriota;c__Thermoleophilia;o__Miltoncostaeales;f__Miltoncostaeaceae;g__SYFI01;s__	GCA_013153375.1	81.8367	0.01	Absence
SLM_MC1B_68-K17	6~8 cm	SAMN40273928	JBCJNS000000000	7730919	7337851	7328703	7328701	348030	921108	70.6983	87	75382	17787	0.672192	40.5643	0	1057	0.877357	d__Bacteria;p__Actinobacteriota;c__Thermoleophilia;o__Miltoncostaeales;f__Miltoncostaeaceae;g__SYFI01;s__	2.27074e+06	d__Bacteria;p__Actinobacteriota;c__Thermoleophilia;o__Miltoncostaeales;f__Miltoncostaeaceae;g__SYFI01;s__	GCA_009694475.1	89.0961	0.02	Presence
SLM_MC1B_68-N18	6~8 cm	SAMN40273929	JBCJNT000000000	10320322	9880640	9864529	9864509	472881	1136080	73.8795	105	76509	16132	0.673375	65.6609	0	1311	0.900722	d__Bacteria;p__Actinobacteriota;c__Thermoleophilia;o__Miltoncostaeales;f__Miltoncostaeaceae;g__SYFI01;s__	1.73022e+06	d__Bacteria;p__Actinobacteriota;c__Thermoleophilia;o__Miltoncostaeales;f__Miltoncostaeaceae;g__SYFI01;s__	GCA_019115265.1	82.479	0.01	Absence
SLM_MC1B_68-O17	6~8 cm	SAMN40273930	JBCJNU000000000	9810190	9181827	9165405	9165385	665663	1590385	72.3546	137	64099	15773	0.675172	79.7414	0	1749	0.897716	d__Bacteria;p__Actinobacteriota;c__Thermoleophilia;o__Miltoncostaeales;f__Miltoncostaeaceae;g__SYFI01;s__	1.99443e+06	d__Bacteria;p__Actinobacteriota;c__Thermoleophilia;o__Miltoncostaeales;f__Miltoncostaeaceae;g__SYFI01;s__	GCA_903866425.1	80.9729	0.45	Absence
SLM_MC1B_24-C23	2~4 cm	SAMN40273931	JBCJNV000000000	7072006	6786976	6777508	6777477	416250	1141002	66.744	76	75075	25484	0.675891	56.4655	0	1269	0.906506	d__Bacteria;p__Actinobacteriota;c__Thermoleophilia;o__Miltoncostaeales;f__Miltoncostaeaceae;g__SYFI01;s__	2.02071e+06	d__Bacteria;p__Actinobacteriota;c__Thermoleophilia;o__Miltoncostaeales;f__Miltoncostaeaceae;g__SYFI01;s__	GCA_903866425.1	81.2085	0.5	Absence
SLM_MC1B_68-B06	6~8 cm	SAMN40273932	JBCJNW000000000	9901320	9159549	9143479	9143396	168061	414570	67.7205	32	72352	20563	0.671252	14.3678	0	467	0.905813	d__Bacteria;p__Actinobacteriota;c__Thermoleophilia;o__Miltoncostaeales;f__Miltoncostaeaceae;g__SYFI01;s__	2.88541e+06	d__Bacteria;p__Actinobacteriota;c__Thermoleophilia;o__Miltoncostaeales;f__Miltoncostaeaceae;g__SYFI01;s__	GCA_903866425.1	81.3282	0.41	Absence
SLM_MC1B_46-G15	4~6 cm	SAMN40273933	JBCJNX000000000	8500828	8030663	8021361	8021309	246069	754860	59.3837	59	43989	20362	0.672346	38.5057	0	878	0.887806	d__Bacteria;p__Actinobacteriota;c__Thermoleophilia;o__Miltoncostaeales;f__Miltoncostaeaceae;g__SYFI01;s__	1.96038e+06	d__Bacteria;p__Actinobacteriota;c__Thermoleophilia;o__Miltoncostaeales;f__Miltoncostaeaceae;g__SYFI01;s__	GCF_003932495.1	83.6311	0	Absence
SLM_MC1B_68-M11	6~8 cm	SAMN40273934	JBCJNY000000000	7639070	7271853	7263314	7263302	541134	1450285	69.9595	89	77286	26882	0.67518	71.0345	0	1621	0.904266	d__Bacteria;p__Actinobacteriota;c__Thermoleophilia;o__Miltoncostaeales;f__Miltoncostaeaceae;g__SYFI01;s__	2.04166e+06	d__Bacteria;p__Actinobacteriota;c__Thermoleophilia;o__Miltoncostaeales;f__Miltoncostaeaceae;g__SYFI01;s__	GCF_018968705.1	81.3309	0.02	Presence
SLM_MC1B_68-G11	6~8 cm	SAMN40273935	JBCJNZ000000000	11200194	10620416	10613177	10613154	362625	946554	69.9832	70	63941	26799	0.67509	44.4684	0	1046	0.900728	d__Bacteria;p__Actinobacteriota;c__Thermoleophilia;o__Miltoncostaeales;f__Miltoncostaeaceae;g__SYFI01;s__	2.1286e+06	d__Bacteria;p__Actinobacteriota;c__Thermoleophilia;o__Miltoncostaeales;f__Miltoncostaeaceae;g__SYFI01;s__	GCA_003563985.1	83.0228	0.01	Presence
SLM_MC1B_68-E22	6~8 cm	SAMN40273936	JBCJOA000000000	9151650	8686655	8674581	8674580	394239	1050335	68.9993	82	45965	24098	0.676437	61.3506	0	1205	0.896283	d__Bacteria;p__Actinobacteriota;c__Thermoleophilia;o__Miltoncostaeales;f__Miltoncostaeaceae;g__SYFI01;s__	1.71202e+06	d__Bacteria;p__Actinobacteriota;c__Thermoleophilia;o__Miltoncostaeales;f__Miltoncostaeaceae;g__SYFI01;s__	GCF_001642025.1	84.9874	0.01	Presence
SLM_MC1B_68-G08	6~8 cm	SAMN40273937	JBCJOB000000000	9133890	8752484	8744045	8744040	455727	1145762	71.4133	104	62351	17058	0.674827	53.8793	0	1280	0.895631	d__Bacteria;p__Actinobacteriota;c__Thermoleophilia;o__Miltoncostaeales;f__Miltoncostaeaceae;g__SYFI01;s__	2.12653e+06	d__Bacteria;p__Actinobacteriota;c__Thermoleophilia;o__Miltoncostaeales;f__Miltoncostaeaceae;g__SYFI01;s__	GCF_001983995.1	82.6988	0.02	Presence
SLM_LV1_BS-C09	BulkSediment	SAMN40273938	JBCJOC000000000	9386410	8990837	8973737	8973716	586334	1396224	75.6961	113	69874	17465	0.675793	65.2299	0	1566	0.903891	d__Bacteria;p__Actinobacteriota;c__Thermoleophilia;o__Miltoncostaeales;f__Miltoncostaeaceae;g__SYFI01;s__	2.14047e+06	d__Bacteria;p__Actinobacteriota;c__Thermoleophilia;o__Miltoncostaeales;f__Miltoncostaeaceae;g__SYFI01;s__	GCA_903866425.1	81.2933	0.47	Absence
SLM_MC1B_68-M19	6~8 cm	SAMN40273939	JBCJOD000000000	9890607	9479427	9462605	9462588	370334	963686	72.198	71	65193	20286	0.67596	47.4138	4.31034	1068	0.910066	d__Bacteria;p__Actinobacteriota;c__Thermoleophilia;o__Miltoncostaeales;f__Miltoncostaeaceae;g__SYFI01;s__	2.0325e+06	d__Bacteria;p__Actinobacteriota;c__Thermoleophilia;o__Miltoncostaeales;f__Miltoncostaeaceae;g__SYFI01;s__	GCA_019061145.1	81.4617	0.01	Absence
SLM_MC1B_68-C10	6~8 cm	SAMN40273940	JBCJOE000000000	9932299	9373419	9360563	9360503	407388	1093585	66.513	75	67058	22575	0.676182	64.5115	0	1190	0.908766	d__Bacteria;p__Actinobacteriota;c__Thermoleophilia;o__Miltoncostaeales;f__Miltoncostaeaceae;g__SYFI01;s__	1.69518e+06	d__Bacteria;p__Actinobacteriota;c__Thermoleophilia;o__Miltoncostaeales;f__Miltoncostaeaceae;g__SYFI01;s__	GCA_011054265.1	82.1368	0	Presence
SLM_MC1B_24-L19	2~4 cm	SAMN40273941	JBCJOF000000000	9808054	9232594	9216890	9216812	278305	741077	64.5759	69	34999	16074	0.671927	30.0698	0	809	0.908584	d__Bacteria;p__Actinobacteriota;c__Thermoleophilia;o__Miltoncostaeales;f__Miltoncostaeaceae;g__SYFI01;s__	2.46452e+06	d__Bacteria;p__Actinobacteriota;c__Thermoleophilia;o__Miltoncostaeales;f__Miltoncostaeaceae;g__SYFI01;s__	GCF_002890795.1	83.7075	0	Presence
SLM_LV1_BS-J09	BulkSediment	SAMN40273942	JBCJOG000000000	11231615	10760543	10746261	10746244	573827	1463754	70.7403	142	46309	15266	0.675129	79.454	0	1606	0.910594	d__Bacteria;p__Actinobacteriota;c__Thermoleophilia;o__Miltoncostaeales;f__Miltoncostaeaceae;g__SYFI01;s__	1.84227e+06	d__Bacteria;p__Actinobacteriota;c__Thermoleophilia;o__Miltoncostaeales;f__Miltoncostaeaceae;g__SYFI01;s__	GCF_000234355.1	83.6311	0	Presence
SLM_MC1B_24-P01	2~4 cm	SAMN40273943	JBCJOH000000000	9032994	8501593	8490232	8490115	489661	1298351	66.5124	115	66059	16396	0.673169	53.4483	0	1388	0.899519	d__Bacteria;p__Actinobacteriota;c__Thermoleophilia;o__Miltoncostaeales;f__Miltoncostaeaceae;g__SYFI01;s__	2.42917e+06	d__Bacteria;p__Actinobacteriota;c__Thermoleophilia;o__Miltoncostaeales;f__Miltoncostaeaceae;g__SYFI01;s__	GCF_000375525.1	85.8042	0	Presence
SLM_MC1B_02-K10	0~2 cm	SAMN40273944	JBCJOI000000000	9798908	9338129	9329958	9329950	294701	815614	64.5352	87	44367	13998	0.671962	30.4598	0	901	0.888434	d__Bacteria;p__Actinobacteriota;c__Thermoleophilia;o__Miltoncostaeales;f__Miltoncostaeaceae;g__SYFI01;s__	2.67768e+06	d__Bacteria;p__Actinobacteriota;c__Thermoleophilia;o__Miltoncostaeales;f__Miltoncostaeaceae;g__SYFI01;s__	GCA_005893185.1	82.9204	0.01	Absence
SLM_MC1B_68-J20	6~8 cm	SAMN40273945	JBCJOJ000000000	9212061	8783274	8761491	8761487	263166	642238	74.0749	33	75727	32646	0.67219	29.3103	0	717	0.893961	d__Bacteria;p__Actinobacteriota;c__Thermoleophilia;o__Miltoncostaeales;f__Miltoncostaeaceae;g__SYFI01;s__	2.19116e+06	d__Bacteria;p__Actinobacteriota;c__Thermoleophilia;o__Miltoncostaeales;f__Miltoncostaeaceae;g__SYFI01;s__	GCA_009923785.1	82.175	0.01	Presence
SLM_MC1B_24-M14	2~4 cm	SAMN40273946	JBCJOK000000000	11175275	10525921	10515998	10515942	461024	1234729	65.5219	98	58523	20170	0.674035	63.3621	0	1335	0.909566	d__Bacteria;p__Actinobacteriota;c__Thermoleophilia;o__Miltoncostaeales;f__Miltoncostaeaceae;g__SYFI01;s__	1.94869e+06	d__Bacteria;p__Actinobacteriota;c__Thermoleophilia;o__Miltoncostaeales;f__Miltoncostaeaceae;g__SYFI01;s__	GCF_001457435.1	83.7851	0.01	Presence
SLM_MC1B_68-P01	6~8 cm	SAMN40273947	JBCJOL000000000	11682676	11157912	11144468	11144459	275774	698926	70.164	52	103439	20062	0.67321	26.5805	0	787	0.910614	d__Bacteria;p__Actinobacteriota;c__Thermoleophilia;o__Miltoncostaeales;f__Miltoncostaeaceae;g__SYFI01;s__	2.62947e+06	d__Bacteria;p__Actinobacteriota;c__Thermoleophilia;o__Miltoncostaeales;f__Miltoncostaeaceae;g__SYFI01;s__	GCA_002305265.1	81.2767	0.01	Absence
SLM_MC1B_68-B16	6~8 cm	SAMN40273948	JBCJOM000000000	7446927	6823159	6807971	6807902	289995	704359	66.4614	54	39899	22432	0.672374	29.4951	0	764	0.914497	d__Bacteria;p__Actinobacteriota;c__Thermoleophilia;o__Miltoncostaeales;f__Miltoncostaeaceae;g__SYFI01;s__	2.38806e+06	d__Bacteria;p__Actinobacteriota;c__Thermoleophilia;o__Miltoncostaeales;f__Miltoncostaeaceae;g__SYFI01;s__	GCA_019112625.1	83.3679	0	Absence
SLM_MC1B_68-M21	6~8 cm	SAMN40273949	JBCJON000000000	8766120	8389426	8377124	8377108	382559	1020940	67.6127	72	143521	25132	0.673841	52.0115	0.431034	1134	0.905871	d__Bacteria;p__Actinobacteriota;c__Thermoleophilia;o__Miltoncostaeales;f__Miltoncostaeaceae;g__SYFI01;s__	1.96291e+06	d__Bacteria;p__Actinobacteriota;c__Thermoleophilia;o__Miltoncostaeales;f__Miltoncostaeaceae;g__SYFI01;s__	GCF_009176725.1	84.7609	0.02	Presence
SLM_LV1_0830-C16	0.8~3.0 um	SAMN40273950	JBCJOO000000000	11019214	10537388	10526797	10526781	258555	671054	64.7262	68	32530	15664	0.670328	22.8056	0	725	0.910608	d__Bacteria;p__Actinobacteriota;c__Thermoleophilia;o__Miltoncostaeales;f__Miltoncostaeaceae;g__SYFI01;s__	2.94249e+06	d__Bacteria;p__Actinobacteriota;c__Thermoleophilia;o__Miltoncostaeales;f__Miltoncostaeaceae;g__SYFI01;s__	GCF_003350405.1	84.5888	0.01	Absence
SLM_MC1B_24-K07	2~4 cm	SAMN40273951	JBCJOP000000000	9240449	8775941	8765018	8765007	419636	1086790	68.4863	83	135033	19598	0.673925	64.61	0	1193	0.915509	d__Bacteria;p__Actinobacteriota;c__Thermoleophilia;o__Miltoncostaeales;f__Miltoncostaeaceae;g__SYFI01;s__	1.68208e+06	d__Bacteria;p__Actinobacteriota;c__Thermoleophilia;o__Miltoncostaeales;f__Miltoncostaeaceae;g__SYFI01;s__	GCF_011058215.1	81.0466	0.01	Absence
SLM_MC1B_24-L15	2~4 cm	SAMN40273952	JBCJOQ000000000	9229821	8666941	8595833	8595724	303301	798282	65.148	66	62054	22913	0.67659	32.069	0	876	0.916642	d__Bacteria;p__Actinobacteriota;c__Thermoleophilia;o__Miltoncostaeales;f__Miltoncostaeaceae;g__SYFI01;s__	2.48927e+06	d__Bacteria;p__Actinobacteriota;c__Thermoleophilia;o__Miltoncostaeales;f__Miltoncostaeaceae;g__SYFI01;s__	GCA_903866425.1	80.667	0.52	Absence
SLM_MC1B_68-F20	6~8 cm	SAMN40273953	JBCJOR000000000	8376292	7963116	7952230	7952214	423304	1072720	70.567	61	84983	29172	0.673335	54.1667	0	1191	0.912237	d__Bacteria;p__Actinobacteriota;c__Thermoleophilia;o__Miltoncostaeales;f__Miltoncostaeaceae;g__SYFI01;s__	1.98041e+06	d__Bacteria;p__Actinobacteriota;c__Thermoleophilia;o__Miltoncostaeales;f__Miltoncostaeaceae;g__SYFI01;s__	GCF_900105025.1	81.4722	0.02	Presence
SLM_MC1B_24-I11	2~4 cm	SAMN40273954	JBCJOS000000000	8490754	8074125	8058776	8058647	451634	1120193	71.1878	91	53034	19621	0.6735	46.0181	0	1195	0.902052	d__Bacteria;p__Actinobacteriota;c__Thermoleophilia;o__Miltoncostaeales;f__Miltoncostaeaceae;g__SYFI01;s__	2.43425e+06	d__Bacteria;p__Actinobacteriota;c__Thermoleophilia;o__Miltoncostaeales;f__Miltoncostaeaceae;g__SYFI01;s__	GCF_003957255.1	84.2644	0	Presence
SLM_MC1B_24-K13	2~4 cm	SAMN40273955	JBCJOT000000000	10524055	10019001	9960542	9960518	250983	728849	60.932	73	34053	13213	0.671525	13.7931	0	825	0.898379	d__Bacteria;p__Actinobacteriota;c__Thermoleophilia;o__Miltoncostaeales;f__Miltoncostaeaceae;g__SYFI01;s__	5.28416e+06	d__Bacteria;p__Actinobacteriota;c__Thermoleophilia;o__Miltoncostaeales;f__Miltoncostaeaceae;g__SYFI01;s__	GCA_009694475.1	89.0961	0.01	Presence
SLM_MC1B_68-J10	6~8 cm	SAMN40273956	JBCJOU000000000	8189900	7665266	7654797	7654796	250361	782246	57.3016	57	61088	22383	0.673442	27.4425	0	881	0.903861	d__Bacteria;p__Actinobacteriota;c__Thermoleophilia;o__Miltoncostaeales;f__Miltoncostaeaceae;g__SYFI01;s__	2.85049e+06	d__Bacteria;p__Actinobacteriota;c__Thermoleophilia;o__Miltoncostaeales;f__Miltoncostaeaceae;g__SYFI01;s__	GCA_019218415.1	87.0772	0	Presence
SLM_MC1B_24-F16	2~4 cm	SAMN40273957	JBCJOV000000000	9389699	9021102	9011911	9011881	395460	1119181	64.0565	71	66971	30140	0.67322	43.4169	3.44828	1204	0.923444	d__Bacteria;p__Actinobacteriota;c__Thermoleophilia;o__Miltoncostaeales;f__Miltoncostaeaceae;g__SYFI01;s__	2.57775e+06	d__Bacteria;p__Actinobacteriota;c__Thermoleophilia;o__Miltoncostaeales;f__Miltoncostaeaceae;g__SYFI01;s__	GCF_000733845.1	84.389	0.01	Presence
SLM_LV1_30a-I23	>3.0 um	SAMN40273958	JBCJOW000000000	10112447	9530212	9518140	9518138	565388	1428078	69.8085	59	111705	43053	0.672131	65.8251	0	1497	0.926304	d__Bacteria;p__Actinobacteriota;c__Thermoleophilia;o__Miltoncostaeales;f__Miltoncostaeaceae;g__SYFI01;s__	2.1695e+06	d__Bacteria;p__Actinobacteriota;c__Thermoleophilia;o__Miltoncostaeales;f__Miltoncostaeaceae;g__SYFI01;s__	GCF_009695875.1	85.4545	0.01	Presence
SLM_MC1B_46-F11	4~6 cm	SAMN40273959	JBCJOX000000000	7944090	7527403	7516729	7516708	264517	757957	63.0305	38	70676	44530	0.673805	46.6954	0	801	0.921963	d__Bacteria;p__Actinobacteriota;c__Thermoleophilia;o__Miltoncostaeales;f__Miltoncostaeaceae;g__SYFI01;s__	1.62319e+06	d__Bacteria;p__Actinobacteriota;c__Thermoleophilia;o__Miltoncostaeales;f__Miltoncostaeaceae;g__SYFI01;s__	GCF_014205075.1	82.4569	0.04	Presence
SLM_MC1B_24-D10	2~4 cm	SAMN40273960	JBCJOY000000000	7713388	7367790	7355527	7355446	164469	466352	62.9002	23	68358	40012	0.668469	15.5172	0	498	0.916297	d__Bacteria;p__Actinobacteriota;c__Thermoleophilia;o__Miltoncostaeales;f__Miltoncostaeaceae;g__SYFI01;s__	3.00538e+06	d__Bacteria;p__Actinobacteriota;c__Thermoleophilia;o__Miltoncostaeales;f__Miltoncostaeaceae;g__SYFI01;s__	GCA_903866425.1	80.669	0.44	Absence
SLM_LV1_0208-P15	0.2~0.8 um	SAMN40273961	JBCJOZ000000000	11054164	10420322	10402066	10402027	224627	510732	73.528	64	33439	10113	0.671685	20.2586	0	576	0.914435	d__Bacteria;p__Actinobacteriota;c__Thermoleophilia;o__Miltoncostaeales;f__Miltoncostaeaceae;g__SYFI01;s__	2.52106e+06	d__Bacteria;p__Actinobacteriota;c__Thermoleophilia;o__Miltoncostaeales;f__Miltoncostaeaceae;g__SYFI01;s__	GCF_900182665.1	81.3196	0.02	Presence
SLM_MC1B_68-B14	6~8 cm	SAMN40273962	JBCJPA000000000	8303105	7655569	7632498	7632442	366366	832832	71.0205	52	62900	30036	0.670187	49.1667	0	887	0.928079	d__Bacteria;p__Actinobacteriota;c__Thermoleophilia;o__Miltoncostaeales;f__Miltoncostaeaceae;g__SYFI01;s__	1.6939e+06	d__Bacteria;p__Actinobacteriota;c__Thermoleophilia;o__Miltoncostaeales;f__Miltoncostaeaceae;g__SYFI01;s__	GCF_001570905.1	83.9691	0.02	Presence
SLM_MC1B_68-J22	6~8 cm	SAMN40273963	JBCJPB000000000	10511476	10022975	10005931	10005917	296913	745613	71.1911	44	81975	31031	0.669315	22.6293	0	811	0.904872	d__Bacteria;p__Actinobacteriota;c__Thermoleophilia;o__Miltoncostaeales;f__Miltoncostaeaceae;g__SYFI01;s__	3.2949e+06	d__Bacteria;p__Actinobacteriota;c__Thermoleophilia;o__Miltoncostaeales;f__Miltoncostaeaceae;g__SYFI01;s__	GCF_001457795.1	85.3164	0.02	Presence
SLM_MC1B_68-D07	6~8 cm	SAMN40273964	JBCJPC000000000	10871936	10283979	10269779	10269755	449762	1119756	71.0578	60	95628	31159	0.672293	56.3424	0	1227	0.924019	d__Bacteria;p__Actinobacteriota;c__Thermoleophilia;o__Miltoncostaeales;f__Miltoncostaeaceae;g__SYFI01;s__	1.98741e+06	d__Bacteria;p__Actinobacteriota;c__Thermoleophilia;o__Miltoncostaeales;f__Miltoncostaeaceae;g__SYFI01;s__	GCF_001552675.1	85.2792	0	Presence
SLM_MC1B_68-O23	6~8 cm	SAMN40273965	JBCJPD000000000	9443484	9053918	9039447	9039438	538194	1369572	70.3695	71	97327	40876	0.67259	56.8966	0	1443	0.914759	d__Bacteria;p__Actinobacteriota;c__Thermoleophilia;o__Miltoncostaeales;f__Miltoncostaeaceae;g__SYFI01;s__	2.40713e+06	d__Bacteria;p__Actinobacteriota;c__Thermoleophilia;o__Miltoncostaeales;f__Miltoncostaeaceae;g__SYFI01;s__	GCA_014055465.1	82.9458	0	Presence
SLM_MC1B_68-A17	6~8 cm	SAMN40273966	JBCJPE000000000	10031107	9599927	9589230	9589196	270160	723552	62.7002	74	34828	15012	0.670675	39.9687	0	807	0.904228	d__Bacteria;p__Actinobacteriota;c__Thermoleophilia;o__Miltoncostaeales;f__Miltoncostaeaceae;g__SYFI01;s__	1.8103e+06	d__Bacteria;p__Actinobacteriota;c__Thermoleophilia;o__Miltoncostaeales;f__Miltoncostaeaceae;g__SYFI01;s__	GCF_900163655.1	87.028	0	Presence
SLM_MC1B_24-D11	2~4 cm	SAMN40273967	JBCJPF000000000	8354630	8025318	8010051	8010029	535502	1352888	71.044	60	104981	42049	0.672207	69.4684	0	1462	0.922803	d__Bacteria;p__Actinobacteriota;c__Thermoleophilia;o__Miltoncostaeales;f__Miltoncostaeaceae;g__SYFI01;s__	1.94749e+06	d__Bacteria;p__Actinobacteriota;c__Thermoleophilia;o__Miltoncostaeales;f__Miltoncostaeaceae;g__SYFI01;s__	GCA_001045575.1	82.0858	0.01	Presence
SLM_MC1B_68-C13	6~8 cm	SAMN40273968	JBCJPG000000000	12878192	12028104	12018153	12018152	263398	674038	71.2577	23	130560	51981	0.673358	32.7586	0	709	0.923464	d__Bacteria;p__Actinobacteriota;c__Thermoleophilia;o__Miltoncostaeales;f__Miltoncostaeaceae;g__SYFI01;s__	2.05759e+06	d__Bacteria;p__Actinobacteriota;c__Thermoleophilia;o__Miltoncostaeales;f__Miltoncostaeaceae;g__SYFI01;s__	GCA_902805985.1	83.072	0.04	Presence
SLM_MC1B_68-O03	6~8 cm	SAMN40273969	JBCJPH000000000	7294460	6880649	6871043	6871041	606190	1527171	71.797	74	94036	37426	0.674128	70.8539	0	1652	0.900297	d__Bacteria;p__Actinobacteriota;c__Thermoleophilia;o__Miltoncostaeales;f__Miltoncostaeaceae;g__SYFI01;s__	2.15538e+06	d__Bacteria;p__Actinobacteriota;c__Thermoleophilia;o__Miltoncostaeales;f__Miltoncostaeaceae;g__SYFI01;s__	GCF_013620795.1	84.315	0	Presence
SLM_MC1B_68-C08	6~8 cm	SAMN40273970	JBCJPI000000000	9944929	9567625	9556367	9556332	270161	670647	70.2417	61	94681	14586	0.670848	33.3846	0	765	0.902977	d__Bacteria;p__Actinobacteriota;c__Thermoleophilia;o__Miltoncostaeales;f__Miltoncostaeaceae;g__SYFI01;s__	2.00885e+06	d__Bacteria;p__Actinobacteriota;c__Thermoleophilia;o__Miltoncostaeales;f__Miltoncostaeaceae;g__SYFI01;s__	GCA_903866425.1	80.2229	0.48	Absence
SLM_MC1B_24-F07	2~4 cm	SAMN40273971	JBCJPJ000000000	10463391	10013213	10003096	10003084	458105	1148189	71.9336	45	152129	53793	0.671854	50.3736	0	1269	0.913512	d__Bacteria;p__Actinobacteriota;c__Thermoleophilia;o__Miltoncostaeales;f__Miltoncostaeaceae;g__SYFI01;s__	2.27935e+06	d__Bacteria;p__Actinobacteriota;c__Thermoleophilia;o__Miltoncostaeales;f__Miltoncostaeaceae;g__SYFI01;s__	GCA_001443495.1	84.6924	0.01	Presence
SLM_MC1B_24-D05	2~4 cm	SAMN40273972	JBCJPK000000000	11336544	10862565	10823050	10823036	424583	1011947	75.4217	63	146735	31516	0.670803	41.5805	0	1153	0.913806	d__Bacteria;p__Actinobacteriota;c__Thermoleophilia;o__Miltoncostaeales;f__Miltoncostaeaceae;g__SYFI01;s__	2.43371e+06	d__Bacteria;p__Actinobacteriota;c__Thermoleophilia;o__Miltoncostaeales;f__Miltoncostaeaceae;g__SYFI01;s__	GCF_014118685.1	85.7302	0	Presence
SLM_MC1B_46-E11	4~6 cm	SAMN40273973	JBCJPL000000000	10519516	10007936	9998166	9998075	535199	1295952	74.3847	82	109091	34463	0.672232	59.0086	0	1475	0.922374	d__Bacteria;p__Actinobacteriota;c__Thermoleophilia;o__Miltoncostaeales;f__Miltoncostaeaceae;g__SYFI01;s__	2.19621e+06	d__Bacteria;p__Actinobacteriota;c__Thermoleophilia;o__Miltoncostaeales;f__Miltoncostaeaceae;g__SYFI01;s__	GCA_900555735.1	81.8858	0.01	Absence
SLM_MC1B_24-G11	2~4 cm	SAMN40273974	JBCJPM000000000	9412089	8999571	8989009	8988846	743223	1788295	75.9806	52	172533	67950	0.672953	86.9253	0	1883	0.917603	d__Bacteria;p__Actinobacteriota;c__Thermoleophilia;o__Miltoncostaeales;f__Miltoncostaeaceae;g__SYFI01;s__	2.05728e+06	d__Bacteria;p__Actinobacteriota;c__Thermoleophilia;o__Miltoncostaeales;f__Miltoncostaeaceae;g__SYFI01;s__	GCF_014118685.1	85.7302	0	Presence
SLM_MC1B_02-O07	0~2 cm	SAMN40273975	JBCJPN000000000	10901437	10411911	10402440	10402410	364029	1027310	62.975	63	72057	42938	0.671582	49.8851	0	1145	0.918687	d__Bacteria;p__Actinobacteriota;c__Thermoleophilia;o__Miltoncostaeales;f__Miltoncostaeaceae;g__SYFI01;s__	2.05935e+06	d__Bacteria;p__Actinobacteriota;c__Thermoleophilia;o__Miltoncostaeales;f__Miltoncostaeaceae;g__SYFI01;s__	GCA_903866425.1	80.7957	0.51	Absence
SLM_MC1B_24-L16	2~4 cm	SAMN40273976	JBCJPO000000000	7014434	6537259	6524119	6524014	224842	610032	62.6781	52	57028	15390	0.673265	36.0324	0	694	0.914955	d__Bacteria;p__Actinobacteriota;c__Thermoleophilia;o__Miltoncostaeales;f__Miltoncostaeaceae;g__SYFI01;s__	1.69301e+06	d__Bacteria;p__Actinobacteriota;c__Thermoleophilia;o__Miltoncostaeales;f__Miltoncostaeaceae;g__SYFI01;s__	GCA_903866425.1	80.3447	0.42	Absence
SLM_MC1B_02-I18	0~2 cm	SAMN40273977	JBCJPP000000000	13648800	12847679	12833029	12833023	194986	506500	66.6644	38	97594	20463	0.670809	20.6897	0	569	0.903074	d__Bacteria;p__Actinobacteriota;c__Thermoleophilia;o__Miltoncostaeales;f__Miltoncostaeaceae;g__SYFI01;s__	2.44808e+06	d__Bacteria;p__Actinobacteriota;c__Thermoleophilia;o__Miltoncostaeales;f__Miltoncostaeaceae;g__SYFI01;s__	GCA_903866425.1	81.7009	0.42	Absence
SLM_MC1B_24-J18	2~4 cm	SAMN40273978	JBCJPQ000000000	10079382	9461563	9449936	9449853	175567	452634	66.485	32	63140	23346	0.669956	21.7241	0	505	0.901435	d__Bacteria;p__Actinobacteriota;c__Thermoleophilia;o__Miltoncostaeales;f__Miltoncostaeaceae;g__SYFI01;s__	2.08355e+06	d__Bacteria;p__Actinobacteriota;c__Thermoleophilia;o__Miltoncostaeales;f__Miltoncostaeaceae;g__SYFI01;s__	GCF_000092985.1	83.3346	0.04	Absence
SLM_MC1B_24-B13	2~4 cm	SAMN40273979	JBCJPR000000000	7814567	7383975	7374558	7374491	200318	623811	56.0041	55	47247	25026	0.67103	14.3678	0	703	0.911199	d__Bacteria;p__Actinobacteriota;c__Thermoleophilia;o__Miltoncostaeales;f__Miltoncostaeaceae;g__SYFI01;s__	4.34172e+06	d__Bacteria;p__Actinobacteriota;c__Thermoleophilia;o__Miltoncostaeales;f__Miltoncostaeaceae;g__SYFI01;s__	GCF_000975115.1	86.6491	0.01	Presence
SLM_MC1B_24-J23	2~4 cm	SAMN40273980	JBCJPS000000000	9746217	9314001	9307397	9307042	415741	1136759	64.0168	69	73309	31985	0.669401	56.092	0	1269	0.909273	d__Bacteria;p__Actinobacteriota;c__Thermoleophilia;o__Miltoncostaeales;f__Miltoncostaeaceae;g__SYFI01;s__	2.0266e+06	d__Bacteria;p__Actinobacteriota;c__Thermoleophilia;o__Miltoncostaeales;f__Miltoncostaeaceae;g__SYFI01;s__	GCA_900554455.1	84.037	0.01	Presence
SLM_MC1B_24-A06	2~4 cm	SAMN40273981	JBCJPT000000000	10427483	9875894	9860784	9860764	338032	824751	73.1246	53	49232	34217	0.672795	35.4167	0	912	0.917802	d__Bacteria;p__Actinobacteriota;c__Thermoleophilia;o__Miltoncostaeales;f__Miltoncostaeaceae;g__SYFI01;s__	2.32871e+06	d__Bacteria;p__Actinobacteriota;c__Thermoleophilia;o__Miltoncostaeales;f__Miltoncostaeaceae;g__SYFI01;s__	GCF_900169175.1	81.5973	0.02	Absence
SLM_LV1_BS-L04	BulkSediment	SAMN40273982	JBCJPU000000000	8310740	7886573	7876433	7876427	482853	1193402	70.9352	92	51255	22136	0.671555	47.9433	2.58621	1330	0.909223	d__Bacteria;p__Actinobacteriota;c__Thermoleophilia;o__Miltoncostaeales;f__Miltoncostaeaceae;g__SYFI01;s__	2.48919e+06	d__Bacteria;p__Actinobacteriota;c__Thermoleophilia;o__Miltoncostaeales;f__Miltoncostaeaceae;g__SYFI01;s__	GCA_001443455.1	85.8042	0.01	Absence
SLM_MC1B_810-A22	8~10 cm	SAMN40273983	JBCJPV000000000	10069391	9589257	9576719	9576706	542774	1305320	73.4119	79	123110	22337	0.671995	52.2989	0	1432	0.912131	d__Bacteria;p__Actinobacteriota;c__Thermoleophilia;o__Miltoncostaeales;f__Miltoncostaeaceae;g__SYFI01;s__	2.49589e+06	d__Bacteria;p__Actinobacteriota;c__Thermoleophilia;o__Miltoncostaeales;f__Miltoncostaeaceae;g__SYFI01;s__	GCA_017482345.1	81.097	0	Absence
SLM_MC1B_46-N21	4~6 cm	SAMN40273984	JBCJPW000000000	8409601	8029950	8018261	8018260	345179	965857	63.7465	63	89262	29605	0.67055	43.1034	0	1074	0.902662	d__Bacteria;p__Actinobacteriota;c__Thermoleophilia;o__Miltoncostaeales;f__Miltoncostaeaceae;g__SYFI01;s__	2.24079e+06	d__Bacteria;p__Actinobacteriota;c__Thermoleophilia;o__Miltoncostaeales;f__Miltoncostaeaceae;g__SYFI01;s__	GCF_000466165.1	82.7883	0.01	Presence
SLM_MC1B_24-C04	2~4 cm	SAMN40273985	JBCJPX000000000	7211766	6763247	6753544	6753528	263250	671865	67.5491	50	51802	27711	0.665626	23.2759	0	726	0.904987	d__Bacteria;p__Actinobacteriota;c__Thermoleophilia;o__Miltoncostaeales;f__Miltoncostaeaceae;g__SYFI01;s__	2.88653e+06	d__Bacteria;p__Actinobacteriota;c__Thermoleophilia;o__Miltoncostaeales;f__Miltoncostaeaceae;g__SYFI01;s__	GCA_016703545.1	81.5788	0.01	Presence
SLM_MC1B_02-J03	0~2 cm	SAMN40273986	JBCJPY000000000	8721064	8273201	8255303	8255278	451704	1112155	70.989	59	62324	29684	0.671453	62.3276	0	1209	0.921863	d__Bacteria;p__Actinobacteriota;c__Thermoleophilia;o__Miltoncostaeales;f__Miltoncostaeaceae;g__SYFI01;s__	1.78437e+06	d__Bacteria;p__Actinobacteriota;c__Thermoleophilia;o__Miltoncostaeales;f__Miltoncostaeaceae;g__SYFI01;s__	GCA_002347405.1	83.5059	0.01	Presence
SLM_MC1B_24-B08	2~4 cm	SAMN40273987	JBCJPZ000000000	9930968	9480826	9463851	9463846	270569	752775	63.5179	52	56974	23414	0.67033	40.5172	0.143678	865	0.913596	d__Bacteria;p__Actinobacteriota;c__Thermoleophilia;o__Miltoncostaeales;f__Miltoncostaeaceae;g__SYFI01;s__	1.85791e+06	d__Bacteria;p__Actinobacteriota;c__Thermoleophilia;o__Miltoncostaeales;f__Miltoncostaeaceae;g__SYFI01;s__	GCA_903866425.1	80.4224	0.45	Absence
SLM_MC1B_46-K16	4~6 cm	SAMN40273988	JBCJQA000000000	14914415	14201341	14183542	14183527	174143	411379	73.5139	24	55726	24869	0.667516	15.9483	0	468	0.914009	d__Bacteria;p__Actinobacteriota;c__Thermoleophilia;o__Miltoncostaeales;f__Miltoncostaeaceae;g__SYFI01;s__	2.57946e+06	d__Bacteria;p__Actinobacteriota;c__Thermoleophilia;o__Miltoncostaeales;f__Miltoncostaeaceae;g__SYFI01;s__	GCF_014647915.1	86.3673	0.01	Presence
SLM_MC1B_24-I14	2~4 cm	SAMN40273989	JBCJQB000000000	11267079	10718190	10707130	10707109	460841	1117895	74.082	66	79054	23678	0.671661	48.3477	0	1247	0.916762	d__Bacteria;p__Actinobacteriota;c__Thermoleophilia;o__Miltoncostaeales;f__Miltoncostaeaceae;g__SYFI01;s__	2.3122e+06	d__Bacteria;p__Actinobacteriota;c__Thermoleophilia;o__Miltoncostaeales;f__Miltoncostaeaceae;g__SYFI01;s__	GCA_009693905.1	83.0228	0	Presence
SLM_LV1_30a-D09	>3.0 um	SAMN40273990	JBCJQC000000000	8321404	7839373	7826878	7826742	228080	649981	61.902	55	46447	20172	0.672843	48.2759	0	710	0.912996	d__Bacteria;p__Actinobacteriota;c__Thermoleophilia;o__Miltoncostaeales;f__Miltoncostaeaceae;g__SYFI01;s__	1.34639e+06	d__Bacteria;p__Actinobacteriota;c__Thermoleophilia;o__Miltoncostaeales;f__Miltoncostaeaceae;g__SYFI01;s__	GCF_008831305.1	86.0961	0.02	Presence
SLM_MC1B_68-I07	6~8 cm	SAMN40273991	JBCJQD000000000	9608103	9163541	9139500	9139496	382478	988211	68.1677	63	105998	28431	0.671076	46.2767	0	1078	0.91286	d__Bacteria;p__Actinobacteriota;c__Thermoleophilia;o__Miltoncostaeales;f__Miltoncostaeaceae;g__SYFI01;s__	2.13544e+06	d__Bacteria;p__Actinobacteriota;c__Thermoleophilia;o__Miltoncostaeales;f__Miltoncostaeaceae;g__SYFI01;s__	GCF_014118685.1	85.7302	0.01	Presence
SLM_MC1B_46-P09	4~6 cm	SAMN40273992	JBCJQE000000000	9300467	8896548	8881130	8881072	590574	1411745	74.0229	61	206174	43107	0.672309	66.3793	0	1517	0.917172	d__Bacteria;p__Actinobacteriota;c__Thermoleophilia;o__Miltoncostaeales;f__Miltoncostaeaceae;g__SYFI01;s__	2.12678e+06	d__Bacteria;p__Actinobacteriota;c__Thermoleophilia;o__Miltoncostaeales;f__Miltoncostaeaceae;g__SYFI01;s__	GCF_011039085.1	84.1644	0.01	Presence
SLM_MC1B_24-M08	2~4 cm	SAMN40273993	JBCJQF000000000	10255733	9701000	9687894	9687789	597843	1477431	71.9273	57	219247	48114	0.672687	71.0345	0	1579	0.918639	d__Bacteria;p__Actinobacteriota;c__Thermoleophilia;o__Miltoncostaeales;f__Miltoncostaeaceae;g__SYFI01;s__	2.07988e+06	d__Bacteria;p__Actinobacteriota;c__Thermoleophilia;o__Miltoncostaeales;f__Miltoncostaeaceae;g__SYFI01;s__	GCF_014118685.1	85.7548	0	Presence
SLM_MC1B_46-A04	4~6 cm	SAMN40273994	JBCJQG000000000	11224341	10561277	10548979	10548956	399650	1101376	64.504	78	97814	23469	0.670425	52.1408	0	1234	0.909935	d__Bacteria;p__Actinobacteriota;c__Thermoleophilia;o__Miltoncostaeales;f__Miltoncostaeaceae;g__SYFI01;s__	2.11231e+06	d__Bacteria;p__Actinobacteriota;c__Thermoleophilia;o__Miltoncostaeales;f__Miltoncostaeaceae;g__SYFI01;s__	GCA_004366215.1	81.089	0.01	Presence
SLM_MC1B_24-A08	2~4 cm	SAMN40273995	JBCJQH000000000	9128162	8641557	8622894	8622885	378018	1120774	60.2527	65	92285	31424	0.670942	50.4885	0	1243	0.91436	d__Bacteria;p__Actinobacteriota;c__Thermoleophilia;o__Miltoncostaeales;f__Miltoncostaeaceae;g__SYFI01;s__	2.21986e+06	d__Bacteria;p__Actinobacteriota;c__Thermoleophilia;o__Miltoncostaeales;f__Miltoncostaeaceae;g__SYFI01;s__	GCA_905210085.1	83.5307	0.02	Presence
SLM_MC1B_46-G08	4~6 cm	SAMN40273996	JBCJQI000000000	9054149	8576016	8567260	8567247	196890	480222	71.8444	34	54900	20661	0.667633	17.2414	0	528	0.897352	d__Bacteria;p__Actinobacteriota;c__Thermoleophilia;o__Miltoncostaeales;f__Miltoncostaeaceae;g__SYFI01;s__	2.78529e+06	d__Bacteria;p__Actinobacteriota;c__Thermoleophilia;o__Miltoncostaeales;f__Miltoncostaeaceae;g__SYFI01;s__	GCA_018831265.1	88.242	0.01	Presence
SLM_MC1B_24-K19	2~4 cm	SAMN40273997	JBCJQJ000000000	10686430	10120582	10105588	10105489	501937	1229229	71.474	64	104064	39463	0.673351	74.8563	0	1349	0.922756	d__Bacteria;p__Actinobacteriota;c__Thermoleophilia;o__Miltoncostaeales;f__Miltoncostaeaceae;g__SYFI01;s__	1.64212e+06	d__Bacteria;p__Actinobacteriota;c__Thermoleophilia;o__Miltoncostaeales;f__Miltoncostaeaceae;g__SYFI01;s__	GCF_009469695.1	81.3553	0	Presence
SLM_MC1B_24-N22	2~4 cm	SAMN40273998	JBCJQK000000000	10408184	9888133	9880110	9879976	377261	993831	67.0371	62	77864	28508	0.673535	53.4483	0	1116	0.919585	d__Bacteria;p__Actinobacteriota;c__Thermoleophilia;o__Miltoncostaeales;f__Miltoncostaeaceae;g__SYFI01;s__	1.85943e+06	d__Bacteria;p__Actinobacteriota;c__Thermoleophilia;o__Miltoncostaeales;f__Miltoncostaeaceae;g__SYFI01;s__	GCA_903866425.1	80.9868	0.47	Absence
SLM_MC1B_24-G20	2~4 cm	SAMN40273999	JBCJQL000000000	11137251	10639202	10624215	10624211	371880	966782	69.3121	62	90366	26453	0.671057	51.2931	0	1081	0.907859	d__Bacteria;p__Actinobacteriota;c__Thermoleophilia;o__Miltoncostaeales;f__Miltoncostaeaceae;g__SYFI01;s__	1.88482e+06	d__Bacteria;p__Actinobacteriota;c__Thermoleophilia;o__Miltoncostaeales;f__Miltoncostaeaceae;g__SYFI01;s__	GCA_003053925.1	81.9391	0.01	Presence
SLM_MC1B_02-F08	0~2 cm	SAMN40274000	JBCJQM000000000	9249319	8714067	8696045	8696045	338534	855175	68.9289	51	68634	28558	0.676362	52.227	0	935	0.921559	d__Bacteria;p__Actinobacteriota;c__Thermoleophilia;o__Miltoncostaeales;f__Miltoncostaeaceae;g__SYFI01;s__	1.63742e+06	d__Bacteria;p__Actinobacteriota;c__Thermoleophilia;o__Miltoncostaeales;f__Miltoncostaeaceae;g__SYFI01;s__	GCA_016933355.1	80.9717	0	Absence
SLM_MC1B_46-L08	4~6 cm	SAMN40274001	JBCJQN000000000	9379041	8761008	8741431	8741363	118415	306954	58.5796	40	25719	9440	0.670029	9.75575	0	358	0.900409	d__Bacteria;p__Actinobacteriota;c__Thermoleophilia;o__Miltoncostaeales;f__Miltoncostaeaceae;g__SYFI01;s__	3.14639e+06	d__Bacteria;p__Actinobacteriota;c__Thermoleophilia;o__Miltoncostaeales;f__Miltoncostaeaceae;g__SYFI01;s__	GCA_903866425.1	82.579	0.37	Absence
SLM_MC1B_24-K08	2~4 cm	SAMN40274002	JBCJQO000000000	9956285	9425770	9418734	9418723	339353	939699	64.4131	62	96426	22411	0.671402	47.6724	0	1064	0.914161	d__Bacteria;p__Actinobacteriota;c__Thermoleophilia;o__Miltoncostaeales;f__Miltoncostaeaceae;g__SYFI01;s__	1.97116e+06	d__Bacteria;p__Actinobacteriota;c__Thermoleophilia;o__Miltoncostaeales;f__Miltoncostaeaceae;g__SYFI01;s__	GCF_002179555.1	84.1892	0.01	Presence
SLM_LV1_02b-J22	<0.2 um	SAMN40274003	JBCJQP000000000	8864565	8433269	8417606	8417594	318805	849734	62.986	88	40942	13856	0.646542	38.0342	0	901	0.939609	d__Bacteria;p__Actinobacteriota;c__Thermoleophilia;o__Solirubrobacterales;f__Solirubrobacteraceae;g__F1-60-MAGs163;s__	2.23413e+06	d__Bacteria;p__Actinobacteriota;c__Thermoleophilia;o__Solirubrobacterales;f__Solirubrobacteraceae;g__F1-60-MAGs163;s__	GCA_900552475.1	84.9107	0	Presence
SLM_MC1B_46-K09	4~6 cm	SAMN40274004	JBCJQQ000000000	9602538	8888507	8885201	8885104	185821	550868	55.1019	36	54949	27952	0.645047	31.1966	0	573	0.938493	d__Bacteria;p__Actinobacteriota;c__Thermoleophilia;o__Solirubrobacterales;f__Solirubrobacteraceae;g__F1-60-MAGs163;s__	1.7658e+06	d__Bacteria;p__Actinobacteriota;c__Thermoleophilia;o__Solirubrobacterales;f__Solirubrobacteraceae;g__F1-60-MAGs163;s__	GCF_000633415.1	87.9328	0.02	Presence
SLM_MC1B_68-K02	6~8 cm	SAMN40274005	JBCJQR000000000	7783289	7405502	7396592	7396589	183072	434549	74.2768	31	69775	25497	0.646316	15.3846	0	449	0.938518	d__Bacteria;p__Actinobacteriota;c__Thermoleophilia;o__Solirubrobacterales;f__Solirubrobacteraceae;g__F1-60-MAGs163;s__	2.82457e+06	d__Bacteria;p__Actinobacteriota;c__Thermoleophilia;o__Solirubrobacterales;f__Solirubrobacteraceae;g__F1-60-MAGs163;s__	GCA_903959665.1	81.0643	0.33	Absence
SLM_MC1B_68-N17	6~8 cm	SAMN40274006	JBCJQS000000000	8594472	8207889	8204970	8204954	248729	727370	61.6512	37	74732	42139	0.647647	25.8621	0	737	0.932237	d__Bacteria;p__Actinobacteriota;c__Thermoleophilia;o__Solirubrobacterales;f__Solirubrobacteraceae;g__F1-60-MAGs163;s__	2.8125e+06	d__Bacteria;p__Actinobacteriota;c__Thermoleophilia;o__Solirubrobacterales;f__Solirubrobacteraceae;g__F1-60-MAGs163;s__	GCF_900105345.1	84.9018	0.02	Presence
SLM_MC1B_24-J08	2~4 cm	SAMN40274007	JBCJQT000000000	10360174	9799069	9793495	9793445	227364	683517	59.5365	45	86782	26022	0.644942	43.1034	0	714	0.930138	d__Bacteria;p__Actinobacteriota;c__Thermoleophilia;o__Solirubrobacterales;f__Solirubrobacteraceae;g__F1-60-MAGs163;s__	1.58576e+06	d__Bacteria;p__Actinobacteriota;c__Thermoleophilia;o__Solirubrobacterales;f__Solirubrobacteraceae;g__F1-60-MAGs163;s__	GCF_003576185.1	87.6569	0.01	Presence
SLM_MC1B_24-I07	2~4 cm	SAMN40274008	JBCJQU000000000	8717641	8385167	8377197	8377187	235183	667067	62.4957	43	72614	26685	0.641921	28.3476	0	670	0.934521	d__Bacteria;p__Actinobacteriota;c__Thermoleophilia;o__Solirubrobacterales;f__Solirubrobacteraceae;g__F1-60-MAGs163;s__	2.35317e+06	d__Bacteria;p__Actinobacteriota;c__Thermoleophilia;o__Solirubrobacterales;f__Solirubrobacteraceae;g__F1-60-MAGs163;s__	GCA_009668945.1	83.4336	0.01	Presence
SLM_MC1B_24-D18	2~4 cm	SAMN40274009	JBCJQV000000000	10539082	10110024	10097833	10097822	520310	1328357	71.5873	31	135770	88432	0.648695	60.8832	0	1332	0.94197	d__Bacteria;p__Actinobacteriota;c__Thermoleophilia;o__Solirubrobacterales;f__Solirubrobacteraceae;g__F1-60-MAGs163;s__	2.18181e+06	d__Bacteria;p__Actinobacteriota;c__Thermoleophilia;o__Solirubrobacterales;f__Solirubrobacteraceae;g__F1-60-MAGs163;s__	GCF_015864955.1	86.3171	0	Presence
SLM_MC1B_68-P07	6~8 cm	SAMN40274010	JBCJQW000000000	7500857	7028575	7013191	7013190	542058	1357062	71.3919	44	142082	79649	0.649921	73.5043	0	1380	0.941534	d__Bacteria;p__Actinobacteriota;c__Thermoleophilia;o__Solirubrobacterales;f__Solirubrobacteraceae;g__F1-60-MAGs163;s__	1.84624e+06	d__Bacteria;p__Actinobacteriota;c__Thermoleophilia;o__Solirubrobacterales;f__Solirubrobacteraceae;g__F1-60-MAGs163;s__	GCA_017860075.1	82.9714	0.01	Presence
SLM_MC1B_46-N23	4~6 cm	SAMN40274011	JBCJQX000000000	9748435	9285371	9280565	9280558	380376	1083061	64.5339	39	112680	56786	0.647759	37.931	0	1075	0.93705	d__Bacteria;p__Actinobacteriota;c__Thermoleophilia;o__Solirubrobacterales;f__Solirubrobacteraceae;g__F1-60-MAGs163;s__	2.85534e+06	d__Bacteria;p__Actinobacteriota;c__Thermoleophilia;o__Solirubrobacterales;f__Solirubrobacteraceae;g__F1-60-MAGs163;s__	GCF_900105025.1	86.2179	0.01	Presence
SLM_MC1B_24-F18	2~4 cm	SAMN40274012	JBCJQY000000000	7163213	6864412	6862178	6862130	323575	1101911	52.8552	51	238885	41994	0.643582	64.0456	0	1100	0.938004	d__Bacteria;p__Actinobacteriota;c__Thermoleophilia;o__Solirubrobacterales;f__Solirubrobacteraceae;g__F1-60-MAGs163;s__	1.72051e+06	d__Bacteria;p__Actinobacteriota;c__Thermoleophilia;o__Solirubrobacterales;f__Solirubrobacteraceae;g__F1-60-MAGs163;s__	GCA_902406155.1	83.3831	0	Presence
SLM_MC1B_68-K19	6~8 cm	SAMN40274013	JBCJQZ000000000	7669290	7239537	7231642	7231633	218239	622816	60.4482	48	66453	24807	0.642936	21.9658	0.17094	661	0.923937	d__Bacteria;p__Actinobacteriota;c__Thermoleophilia;o__Solirubrobacterales;f__Solirubrobacteraceae;g__F1-60-MAGs163;s__	2.83539e+06	d__Bacteria;p__Actinobacteriota;c__Thermoleophilia;o__Solirubrobacterales;f__Solirubrobacteraceae;g__F1-60-MAGs163;s__	GCA_016462245.1	80.5822	0.41	Absence
SLM_MC1B_24-N20	2~4 cm	SAMN40274014	JBCJRA000000000	8746218	8254977	8247938	8247839	234500	751254	54.5465	39	88571	32646	0.637939	23.2967	0	753	0.922326	d__Bacteria;p__Actinobacteriota;c__Thermoleophilia;o__Solirubrobacterales;f__Solirubrobacteraceae;g__F1-60-MAGs163;s__	3.22472e+06	d__Bacteria;p__Actinobacteriota;c__Thermoleophilia;o__Solirubrobacterales;f__Solirubrobacteraceae;g__F1-60-MAGs163;s__	GCA_016703125.1	85.3039	0	Presence
SLM_MC1B_02-L16	0~2 cm	SAMN40274015	JBCJRB000000000	8726300	8283642	8278224	8278220	350214	959491	65.077	66	112658	26884	0.649363	50.4274	0	1011	0.941523	d__Bacteria;p__Actinobacteriota;c__Thermoleophilia;o__Solirubrobacterales;f__Solirubrobacteraceae;g__F1-60-MAGs163;s__	1.90272e+06	d__Bacteria;p__Actinobacteriota;c__Thermoleophilia;o__Solirubrobacterales;f__Solirubrobacteraceae;g__F1-60-MAGs163;s__	GCA_003670575.1	82.1112	0.01	Absence
SLM_MC1B_02-I11	0~2 cm	SAMN40274016	JBCJRC000000000	17423662	16554965	16542689	16542689	278683	850580	58.1519	40	165945	43836	0.643421	38.8889	0	873	0.933452	d__Bacteria;p__Actinobacteriota;c__Thermoleophilia;o__Solirubrobacterales;f__Solirubrobacteraceae;g__F1-60-MAGs163;s__	2.18721e+06	d__Bacteria;p__Actinobacteriota;c__Thermoleophilia;o__Solirubrobacterales;f__Solirubrobacteraceae;g__F1-60-MAGs163;s__	GCA_014763725.1	82.745	0.01	Absence
SLM_MC1B_68-P22	6~8 cm	SAMN40274017	JBCJRD000000000	10765358	10073612	10068541	10068508	153960	385094	71.9872	18	75213	34932	0.644453	24.1379	0	374	0.921614	d__Bacteria;p__Actinobacteriota;c__Thermoleophilia;o__Solirubrobacterales;f__Solirubrobacteraceae;g__F1-60-MAGs163;s__	1.59539e+06	d__Bacteria;p__Actinobacteriota;c__Thermoleophilia;o__Solirubrobacterales;f__Solirubrobacteraceae;g__F1-60-MAGs163;s__	GCF_003576185.1	87.6569	0.02	Presence
SLM_LV1_30a-K23	>3.0 um	SAMN40274018	JBCJRE000000000	11127936	10495216	10409493	10409491	512723	1389208	65.4148	56	195593	44494	0.646808	74.1453	0	1402	0.936584	d__Bacteria;p__Actinobacteriota;c__Thermoleophilia;o__Solirubrobacterales;f__Solirubrobacteraceae;g__F1-60-MAGs163;s__	1.87363e+06	d__Bacteria;p__Actinobacteriota;c__Thermoleophilia;o__Solirubrobacterales;f__Solirubrobacteraceae;g__F1-60-MAGs163;s__	GCF_015552075.1	84.8349	0	Presence
SLM_MC1B_24-G19	2~4 cm	SAMN40274019	JBCJRF000000000	13055937	12330867	12315976	12315884	463375	1314177	62.5269	58	154512	34518	0.648554	60.9195	0	1359	0.936078	d__Bacteria;p__Actinobacteriota;c__Thermoleophilia;o__Solirubrobacterales;f__Solirubrobacteraceae;g__F1-60-MAGs163;s__	2.15723e+06	d__Bacteria;p__Actinobacteriota;c__Thermoleophilia;o__Solirubrobacterales;f__Solirubrobacteraceae;g__F1-60-MAGs163;s__	GCA_016462245.1	80.1411	0.41	Absence
SLM_MC1B_68-E05	6~8 cm	SAMN40274020	JBCJRG000000000	10465638	9864595	9852873	9852867	369588	987495	67.1259	37	230494	52690	0.646667	40.7407	0	1020	0.939464	d__Bacteria;p__Actinobacteriota;c__Thermoleophilia;o__Solirubrobacterales;f__Solirubrobacteraceae;g__F1-60-MAGs163;s__	2.42385e+06	d__Bacteria;p__Actinobacteriota;c__Thermoleophilia;o__Solirubrobacterales;f__Solirubrobacteraceae;g__F1-60-MAGs163;s__	GCA_001312805.1	81.1223	0.01	Absence
SLM_LV1_02b-I13	<0.2 um	SAMN40274021	JBCJRH000000000	11458225	10914733	10885077	10885071	274366	652155	71.8901	54	73374	20563	0.64761	13.511	0	672	0.936989	d__Bacteria;p__Actinobacteriota;c__Thermoleophilia;o__Solirubrobacterales;f__Solirubrobacteraceae;g__F1-60-MAGs163;s__	4.82685e+06	d__Bacteria;p__Actinobacteriota;c__Thermoleophilia;o__Solirubrobacterales;f__Solirubrobacteraceae;g__F1-60-MAGs163;s__	GCA_903959665.1	80.7833	0.37	Absence
SLM_LV1_BS-D02	BulkSediment	SAMN40274022	JBCJRI000000000	7209537	6888657	6884000	6883996	448972	1184374	68.4998	50	149849	42382	0.648246	59.4729	0	1200	0.939447	d__Bacteria;p__Actinobacteriota;c__Thermoleophilia;o__Solirubrobacterales;f__Solirubrobacteraceae;g__F1-60-MAGs163;s__	1.99145e+06	d__Bacteria;p__Actinobacteriota;c__Thermoleophilia;o__Solirubrobacterales;f__Solirubrobacteraceae;g__F1-60-MAGs163;s__	GCF_003065485.1	83.476	0.01	Presence
SLM_MC1B_24-N05	2~4 cm	SAMN40274023	JBCJRJ000000000	10065487	9514975	9509702	9509695	231227	686685	59.5162	49	48513	21294	0.64745	30.9687	0	677	0.928538	d__Bacteria;p__Actinobacteriota;c__Thermoleophilia;o__Solirubrobacterales;f__Solirubrobacteraceae;g__F1-60-MAGs163;s__	2.21735e+06	d__Bacteria;p__Actinobacteriota;c__Thermoleophilia;o__Solirubrobacterales;f__Solirubrobacteraceae;g__F1-60-MAGs163;s__	GCF_002252705.1	85.3039	0	Presence
SLM_MC1B_24-N13	2~4 cm	SAMN40274024	JBCJRK000000000	9310206	8801592	8791255	8791148	314107	776132	69.6827	54	148826	29347	0.647673	56.8966	0	794	0.94167	d__Bacteria;p__Actinobacteriota;c__Thermoleophilia;o__Solirubrobacterales;f__Solirubrobacteraceae;g__F1-60-MAGs163;s__	1.36411e+06	d__Bacteria;p__Actinobacteriota;c__Thermoleophilia;o__Solirubrobacterales;f__Solirubrobacteraceae;g__F1-60-MAGs163;s__	GCF_003610405.1	87.1268	0	Presence
SLM_MC1B_02-J11	0~2 cm	SAMN40274025	JBCJRL000000000	8822694	8258222	8246506	8246491	311252	896525	61.3756	55	69162	30083	0.647348	31.6239	0	958	0.93225	d__Bacteria;p__Actinobacteriota;c__Thermoleophilia;o__Solirubrobacterales;f__Solirubrobacteraceae;g__F1-60-MAGs163;s__	2.83496e+06	d__Bacteria;p__Actinobacteriota;c__Thermoleophilia;o__Solirubrobacterales;f__Solirubrobacteraceae;g__F1-60-MAGs163;s__	GCF_002929505.1	87.2272	0	Presence
SLM_MC1B_68-A14	6~8 cm	SAMN40274026	JBCJRM000000000	10386122	9831066	9824570	9824567	237332	617544	68.5071	28	79258	51128	0.642421	53.9316	0	666	0.936256	d__Bacteria;p__Actinobacteriota;c__Thermoleophilia;o__Solirubrobacterales;f__Solirubrobacteraceae;g__F1-60-MAGs163;s__	1.14505e+06	d__Bacteria;p__Actinobacteriota;c__Thermoleophilia;o__Solirubrobacterales;f__Solirubrobacteraceae;g__F1-60-MAGs163;s__	GCA_004366215.1	85.2792	0.01	Presence
SLM_MC1B_68-F17	6~8 cm	SAMN40274027	JBCJRN000000000	9059552	8463455	8456438	8456421	439056	1269349	62.604	43	190830	68940	0.645703	45.7265	0	1261	0.929569	d__Bacteria;p__Actinobacteriota;c__Thermoleophilia;o__Solirubrobacterales;f__Solirubrobacteraceae;g__F1-60-MAGs163;s__	2.77596e+06	d__Bacteria;p__Actinobacteriota;c__Thermoleophilia;o__Solirubrobacterales;f__Solirubrobacteraceae;g__F1-60-MAGs163;s__	GCA_012960245.1	83.5807	0.01	Presence
SLM_MC1B_68-E02	6~8 cm	SAMN40274028	JBCJRO000000000	10064572	9501723	9495699	9495688	320020	1011025	56.1909	47	117122	43347	0.64346	33.3903	0	1015	0.919369	d__Bacteria;p__Actinobacteriota;c__Thermoleophilia;o__Solirubrobacterales;f__Solirubrobacteraceae;g__F1-60-MAGs163;s__	3.0279e+06	d__Bacteria;p__Actinobacteriota;c__Thermoleophilia;o__Solirubrobacterales;f__Solirubrobacteraceae;g__F1-60-MAGs163;s__	GCA_900552475.1	84.1396	0	Presence
SLM_MC1B_24-I16	2~4 cm	SAMN40274029	JBCJRP000000000	8574938	8090570	8081033	8080797	412186	1166035	62.545	55	176184	36741	0.644295	47.4644	0	1191	0.928434	d__Bacteria;p__Actinobacteriota;c__Thermoleophilia;o__Solirubrobacterales;f__Solirubrobacteraceae;g__F1-60-MAGs163;s__	2.45665e+06	d__Bacteria;p__Actinobacteriota;c__Thermoleophilia;o__Solirubrobacterales;f__Solirubrobacteraceae;g__F1-60-MAGs163;s__	GCF_003205515.1	83.6565	0	Presence
SLM_MC1B_24-P09	2~4 cm	SAMN40274030	JBCJRQ000000000	8133100	7637666	7621527	7621482	480901	1485720	58.6506	53	314416	94774	0.646415	58.9744	0	1509	0.930488	d__Bacteria;p__Actinobacteriota;c__Thermoleophilia;o__Solirubrobacterales;f__Solirubrobacteraceae;g__F1-60-MAGs163;s__	2.51926e+06	d__Bacteria;p__Actinobacteriota;c__Thermoleophilia;o__Solirubrobacterales;f__Solirubrobacteraceae;g__F1-60-MAGs163;s__	GCA_011682695.1	81.537	0.01	Presence
SLM_MC1B_02-D13	0~2 cm	SAMN40274031	JBCJRR000000000	9511635	8928265	8892825	8892810	412892	1137105	67.0601	38	142698	59030	0.644806	57.265	0	1161	0.92791	d__Bacteria;p__Actinobacteriota;c__Thermoleophilia;o__Solirubrobacterales;f__Solirubrobacteraceae;g__F1-60-MAGs163;s__	1.98569e+06	d__Bacteria;p__Actinobacteriota;c__Thermoleophilia;o__Solirubrobacterales;f__Solirubrobacteraceae;g__F1-60-MAGs163;s__	GCA_016462245.1	80.4264	0.39	Absence
SLM_MC1B_68-K15	6~8 cm	SAMN40274032	JBCJRS000000000	8988496	8496599	8482478	8482475	279732	807254	61.4834	54	119239	26155	0.645668	23.5755	0	860	0.933341	d__Bacteria;p__Actinobacteriota;c__Thermoleophilia;o__Solirubrobacterales;f__Solirubrobacteraceae;g__F1-60-MAGs163;s__	3.42412e+06	d__Bacteria;p__Actinobacteriota;c__Thermoleophilia;o__Solirubrobacterales;f__Solirubrobacteraceae;g__F1-60-MAGs163;s__	GCA_001486445.1	84.7884	0.01	Presence
SLM_LV1_BS-L06	BulkSediment	SAMN40274033	JBCJRT000000000	9434994	8977743	8944471	8944466	622891	1611502	70.2147	54	220484	74628	0.647405	83.4758	0.854701	1647	0.937299	d__Bacteria;p__Actinobacteriota;c__Thermoleophilia;o__Solirubrobacterales;f__Solirubrobacteraceae;g__F1-60-MAGs163;s__	1.9305e+06	d__Bacteria;p__Actinobacteriota;c__Thermoleophilia;o__Solirubrobacterales;f__Solirubrobacteraceae;g__F1-60-MAGs163;s__	GCF_001447155.2	81.6151	0.01	Presence
SLM_MC1B_24-K17	2~4 cm	SAMN40274034	JBCJRU000000000	8225390	7748900	7741866	7741774	468675	1238087	66.1363	52	128502	43185	0.647296	53.0199	0	1264	0.938463	d__Bacteria;p__Actinobacteriota;c__Thermoleophilia;o__Solirubrobacterales;f__Solirubrobacteraceae;g__F1-60-MAGs163;s__	2.33513e+06	d__Bacteria;p__Actinobacteriota;c__Thermoleophilia;o__Solirubrobacterales;f__Solirubrobacteraceae;g__F1-60-MAGs163;s__	GCA_016462245.1	80.3974	0.42	Absence
SLM_LV1_0830-D18	0.8~3.0 um	SAMN40274035	JBCJRV000000000	9294696	8696149	8683357	8681026	228466	638298	62.6885	54	53372	21244	0.643004	28.49	0	648	0.936602	d__Bacteria;p__Actinobacteriota;c__Thermoleophilia;o__Solirubrobacterales;f__Solirubrobacteraceae;g__F1-60-MAGs163;s__	2.24043e+06	d__Bacteria;p__Actinobacteriota;c__Thermoleophilia;o__Solirubrobacterales;f__Solirubrobacteraceae;g__F1-60-MAGs163;s__	GCF_000420765.1	82.1882	0.01	Absence
SLM_MC1B_02-E20	0~2 cm	SAMN40274036	JBCJRW000000000	10970413	10256667	10240581	10240569	378364	1026728	65.5541	63	93738	29476	0.645943	58.8034	0	1063	0.939265	d__Bacteria;p__Actinobacteriota;c__Thermoleophilia;o__Solirubrobacterales;f__Solirubrobacteraceae;g__F1-60-MAGs163;s__	1.74603e+06	d__Bacteria;p__Actinobacteriota;c__Thermoleophilia;o__Solirubrobacterales;f__Solirubrobacteraceae;g__F1-60-MAGs163;s__	GCF_003046545.1	81.097	0	Absence
SLM_MC1B_24-M06	2~4 cm	SAMN40274037	JBCJRX000000000	8044339	7571778	7550066	7549966	496455	1265459	69.3017	55	106474	50547	0.650073	56.4103	0	1296	0.938884	d__Bacteria;p__Actinobacteriota;c__Thermoleophilia;o__Solirubrobacterales;f__Solirubrobacteraceae;g__F1-60-MAGs163;s__	2.24331e+06	d__Bacteria;p__Actinobacteriota;c__Thermoleophilia;o__Solirubrobacterales;f__Solirubrobacteraceae;g__F1-60-MAGs163;s__	GCF_017744255.1	83.0573	0.01	Presence
SLM_MC1B_68-J15	6~8 cm	SAMN40274038	JBCJRY000000000	7093241	6728328	6725257	6725251	181933	540918	60.6556	30	94764	36367	0.64534	24.7863	0	562	0.929934	d__Bacteria;p__Actinobacteriota;c__Thermoleophilia;o__Solirubrobacterales;f__Solirubrobacteraceae;g__F1-60-MAGs163;s__	2.18232e+06	d__Bacteria;p__Actinobacteriota;c__Thermoleophilia;o__Solirubrobacterales;f__Solirubrobacteraceae;g__F1-60-MAGs163;s__	GCF_017355265.1	87.9807	0.01	Presence
SLM_MC1B_68-I19	6~8 cm	SAMN40274039	JBCJRZ000000000	8312684	7956143	7945271	7945268	279878	675525	73.7866	48	78562	18338	0.646108	58.6207	0	689	0.940423	d__Bacteria;p__Actinobacteriota;c__Thermoleophilia;o__Solirubrobacterales;f__Solirubrobacteraceae;g__F1-60-MAGs163;s__	1.15237e+06	d__Bacteria;p__Actinobacteriota;c__Thermoleophilia;o__Solirubrobacterales;f__Solirubrobacteraceae;g__F1-60-MAGs163;s__	GCF_000466265.1	86.6738	0.01	Presence
SLM_MC1B_24-M19	2~4 cm	SAMN40274040	JBCJSA000000000	9030702	8506576	8500454	8500123	338948	954543	62.4248	56	111165	28337	0.645285	41.8803	0	969	0.939658	d__Bacteria;p__Actinobacteriota;c__Thermoleophilia;o__Solirubrobacterales;f__Solirubrobacteraceae;g__F1-60-MAGs163;s__	2.27921e+06	d__Bacteria;p__Actinobacteriota;c__Thermoleophilia;o__Solirubrobacterales;f__Solirubrobacteraceae;g__F1-60-MAGs163;s__	GCA_004366215.1	85.8042	0.01	Presence
SLM_MC1B_02-C02	0~2 cm	SAMN40274041	JBCJSB000000000	8522740	7994669	7958101	7958075	564200	1570293	65.0424	31	265534	88330	0.649407	71.3675	0	1570	0.933481	d__Bacteria;p__Actinobacteriota;c__Thermoleophilia;o__Solirubrobacterales;f__Solirubrobacteraceae;g__F1-60-MAGs163;s__	2.20029e+06	d__Bacteria;p__Actinobacteriota;c__Thermoleophilia;o__Solirubrobacterales;f__Solirubrobacteraceae;g__F1-60-MAGs163;s__	GCF_014250515.1	81.1223	0	Presence
SLM_MC1B_24-P19	2~4 cm	SAMN40274042	JBCJSC000000000	8042619	7627207	7613023	7613015	461736	1258509	66.8352	63	144237	40099	0.649021	61.5385	0	1305	0.936584	d__Bacteria;p__Actinobacteriota;c__Thermoleophilia;o__Solirubrobacterales;f__Solirubrobacteraceae;g__F1-60-MAGs163;s__	2.04508e+06	d__Bacteria;p__Actinobacteriota;c__Thermoleophilia;o__Solirubrobacterales;f__Solirubrobacteraceae;g__F1-60-MAGs163;s__	GCF_001570925.1	85.829	0.01	Presence
SLM_MC1B_68-G03	6~8 cm	SAMN40274043	JBCJSD000000000	8680008	8254746	8238967	8238955	332353	878609	68.6771	33	148094	52075	0.643616	44.7293	0	873	0.926133	d__Bacteria;p__Actinobacteriota;c__Thermoleophilia;o__Solirubrobacterales;f__Solirubrobacteraceae;g__F1-60-MAGs163;s__	1.96428e+06	d__Bacteria;p__Actinobacteriota;c__Thermoleophilia;o__Solirubrobacterales;f__Solirubrobacteraceae;g__F1-60-MAGs163;s__	GCF_008014645.1	85.3288	0	Presence
SLM_MC1B_68-O10	6~8 cm	SAMN40274044	JBCJSE000000000	11484385	11088700	11077230	11077216	175558	429929	74.066	20	169444	69754	0.646839	7.83699	0	432	0.928114	d__Bacteria;p__Actinobacteriota;c__Thermoleophilia;o__Solirubrobacterales;f__Solirubrobacteraceae;g__F1-60-MAGs163;s__	5.48589e+06	d__Bacteria;p__Actinobacteriota;c__Thermoleophilia;o__Solirubrobacterales;f__Solirubrobacteraceae;g__F1-60-MAGs163;s__	GCA_903959665.1	81.0269	0.39	Absence
SLM_MC1B_46-I09	4~6 cm	SAMN40274045	JBCJSF000000000	7252314	6891136	6886603	6886596	354877	993625	66.0081	40	132625	43793	0.64546	31.0745	0	1035	0.920481	d__Bacteria;p__Actinobacteriota;c__Thermoleophilia;o__Solirubrobacterales;f__Solirubrobacteraceae;g__F1-60-MAGs163;s__	3.19756e+06	d__Bacteria;p__Actinobacteriota;c__Thermoleophilia;o__Solirubrobacterales;f__Solirubrobacteraceae;g__F1-60-MAGs163;s__	GCA_002159155.1	85.8356	0.01	Presence
SLM_MC1B_02-D15	0~2 cm	SAMN40274046	JBCJSG000000000	16362580	15661184	15589322	15589309	394263	1072061	66.2829	64	79605	31349	0.643805	56.8966	0	1098	0.927532	d__Bacteria;p__Actinobacteriota;c__Thermoleophilia;o__Solirubrobacterales;f__Solirubrobacteraceae;g__F1-60-MAGs163;s__	1.88423e+06	d__Bacteria;p__Actinobacteriota;c__Thermoleophilia;o__Solirubrobacterales;f__Solirubrobacteraceae;g__F1-60-MAGs163;s__	GCF_019049105.1	87.6187	0.01	Presence
SLM_MC1B_46-O09	4~6 cm	SAMN40274047	JBCJSH000000000	9321160	8817267	8796309	8796281	288479	771792	67.8998	32	79279	45312	0.644056	26.7094	0	798	0.928224	d__Bacteria;p__Actinobacteriota;c__Thermoleophilia;o__Solirubrobacterales;f__Solirubrobacteraceae;g__F1-60-MAGs163;s__	2.88959e+06	d__Bacteria;p__Actinobacteriota;c__Thermoleophilia;o__Solirubrobacterales;f__Solirubrobacteraceae;g__F1-60-MAGs163;s__	GCA_015351705.1	85.3499	0.02	Presence
SLM_MC1B_24-B17	2~4 cm	SAMN40274048	JBCJSI000000000	8678922	8269087	8261165	8261149	276309	769502	64.2083	51	97554	29372	0.637295	32.499	0.854701	799	0.918096	d__Bacteria;p__Actinobacteriota;c__Thermoleophilia;o__Solirubrobacterales;f__Solirubrobacteraceae;g__F1-60-MAGs163;s__	2.36777e+06	d__Bacteria;p__Actinobacteriota;c__Thermoleophilia;o__Solirubrobacterales;f__Solirubrobacteraceae;g__F1-60-MAGs163;s__	GCF_017795885.1	84.5648	0.02	Presence
SLM_MC1B_24-K15	2~4 cm	SAMN40274049	JBCJSJ000000000	8002327	7562291	7553280	7553201	430758	1142282	66.5321	55	77136	43026	0.648083	53.9886	0	1124	0.936179	d__Bacteria;p__Actinobacteriota;c__Thermoleophilia;o__Solirubrobacterales;f__Solirubrobacteraceae;g__F1-60-MAGs163;s__	2.11578e+06	d__Bacteria;p__Actinobacteriota;c__Thermoleophilia;o__Solirubrobacterales;f__Solirubrobacteraceae;g__F1-60-MAGs163;s__	GCF_904848455.1	86.3673	0	Presence
SLM_MC1B_68-F14	6~8 cm	SAMN40274050	JBCJSK000000000	7604828	7215481	7206877	7206821	462285	1242022	67.5289	39	276302	59803	0.648531	52.1368	0	1232	0.934231	d__Bacteria;p__Actinobacteriota;c__Thermoleophilia;o__Solirubrobacterales;f__Solirubrobacteraceae;g__F1-60-MAGs163;s__	2.38224e+06	d__Bacteria;p__Actinobacteriota;c__Thermoleophilia;o__Solirubrobacterales;f__Solirubrobacteraceae;g__F1-60-MAGs163;s__	GCF_011761265.1	82.8471	0.01	Presence
SLM_LV1_BS-M10	BulkSediment	SAMN40274051	JBCJSL000000000	7521500	7035892	6962109	6962080	622346	1700690	66.4766	43	148152	74378	0.648551	82.7066	0	1704	0.936399	d__Bacteria;p__Actinobacteriota;c__Thermoleophilia;o__Solirubrobacterales;f__Solirubrobacteraceae;g__F1-60-MAGs163;s__	2.05629e+06	d__Bacteria;p__Actinobacteriota;c__Thermoleophilia;o__Solirubrobacterales;f__Solirubrobacteraceae;g__F1-60-MAGs163;s__	GCF_000175615.1	80.9223	0.01	Absence
SLM_MC1B_810-D08	8~10 cm	SAMN40274052	JBCJSM000000000	7961231	7392187	7387711	7387654	311855	925274	59.1728	50	84244	34939	0.639939	36.1823	0	974	0.93188	d__Bacteria;p__Actinobacteriota;c__Thermoleophilia;o__Solirubrobacterales;f__Solirubrobacteraceae;g__F1-60-MAGs163;s__	2.55725e+06	d__Bacteria;p__Actinobacteriota;c__Thermoleophilia;o__Solirubrobacterales;f__Solirubrobacteraceae;g__F1-60-MAGs163;s__	GCA_001443485.1	82.9458	0.01	Absence
SLM_MC1B_02-K07	0~2 cm	SAMN40274053	JBCJSN000000000	9466914	8925535	8919371	8919369	485909	1355283	63.766	50	164911	58296	0.648341	58.49	0.854701	1357	0.937319	d__Bacteria;p__Actinobacteriota;c__Thermoleophilia;o__Solirubrobacterales;f__Solirubrobacteraceae;g__F1-60-MAGs163;s__	2.31712e+06	d__Bacteria;p__Actinobacteriota;c__Thermoleophilia;o__Solirubrobacterales;f__Solirubrobacteraceae;g__F1-60-MAGs163;s__	GCF_001570785.1	87.4314	0.01	Presence
SLM_MC1B_68-G04	6~8 cm	SAMN40274054	JBCJSO000000000	9018042	8601818	8579478	8579472	195820	475084	74.3131	24	94115	31434	0.649681	12.069	0	468	0.938354	d__Bacteria;p__Actinobacteriota;c__Thermoleophilia;o__Solirubrobacterales;f__Solirubrobacteraceae;g__F1-60-MAGs163;s__	3.93641e+06	d__Bacteria;p__Actinobacteriota;c__Thermoleophilia;o__Solirubrobacterales;f__Solirubrobacteraceae;g__F1-60-MAGs163;s__	GCF_003293595.1	84.8094	0.01	Presence
SLM_MC1B_68-I18	6~8 cm	SAMN40274055	JBCJSP000000000	8324260	7852992	7847566	7847458	198463	615162	57.1382	51	49134	21979	0.643476	18.3386	0	644	0.928003	d__Bacteria;p__Actinobacteriota;c__Thermoleophilia;o__Solirubrobacterales;f__Solirubrobacteraceae;g__F1-60-MAGs163;s__	3.35447e+06	d__Bacteria;p__Actinobacteriota;c__Thermoleophilia;o__Solirubrobacterales;f__Solirubrobacteraceae;g__F1-60-MAGs163;s__	GCA_903918555.1	80.0853	0.02	Absence
SLM_MC1B_02-I22	0~2 cm	SAMN40274056	JBCJSQ000000000	10423704	9889570	9864807	9864804	425023	1093770	68.6664	54	98818	39786	0.645735	49.2877	0	1122	0.934796	d__Bacteria;p__Actinobacteriota;c__Thermoleophilia;o__Solirubrobacterales;f__Solirubrobacteraceae;g__F1-60-MAGs163;s__	2.21915e+06	d__Bacteria;p__Actinobacteriota;c__Thermoleophilia;o__Solirubrobacterales;f__Solirubrobacteraceae;g__F1-60-MAGs163;s__	GCF_900105965.1	83.2525	0.01	Presence
SLM_MC1B_24-J14	2~4 cm	SAMN40274057	JBCJSR000000000	9222738	8745817	8725384	8725352	412100	1150149	64.9067	54	94693	37253	0.64688	46.8661	0	1176	0.934663	d__Bacteria;p__Actinobacteriota;c__Thermoleophilia;o__Solirubrobacterales;f__Solirubrobacteraceae;g__F1-60-MAGs163;s__	2.45412e+06	d__Bacteria;p__Actinobacteriota;c__Thermoleophilia;o__Solirubrobacterales;f__Solirubrobacteraceae;g__F1-60-MAGs163;s__	GCA_016462245.1	80.4667	0.44	Absence
SLM_MC1B_68-G15	6~8 cm	SAMN40274058	JBCJSS000000000	7049048	6688538	6682142	6682086	251381	571145	79.0784	26	107002	52615	0.646978	35.3582	0	573	0.935876	d__Bacteria;p__Actinobacteriota;c__Thermoleophilia;o__Solirubrobacterales;f__Solirubrobacteraceae;g__F1-60-MAGs163;s__	1.61531e+06	d__Bacteria;p__Actinobacteriota;c__Thermoleophilia;o__Solirubrobacterales;f__Solirubrobacteraceae;g__F1-60-MAGs163;s__	GCF_002929505.1	86.2179	0.01	Presence
SLM_MC1B_24-B11	2~4 cm	SAMN40274059	JBCJST000000000	9957917	9434914	9420938	9420925	228857	628922	64.5656	50	83594	20263	0.640983	28.2051	0	678	0.921507	d__Bacteria;p__Actinobacteriota;c__Thermoleophilia;o__Solirubrobacterales;f__Solirubrobacteraceae;g__F1-60-MAGs163;s__	2.22981e+06	d__Bacteria;p__Actinobacteriota;c__Thermoleophilia;o__Solirubrobacterales;f__Solirubrobacteraceae;g__F1-60-MAGs163;s__	GCF_002847825.1	84.6485	0.01	Presence
SLM_MC1B_24-M09	2~4 cm	SAMN40274060	JBCJSU000000000	10707478	10169607	10126772	10126720	380662	1114564	60.5818	39	221099	56255	0.645157	53.7037	0	1130	0.92746	d__Bacteria;p__Actinobacteriota;c__Thermoleophilia;o__Solirubrobacterales;f__Solirubrobacteraceae;g__F1-60-MAGs163;s__	2.0754e+06	d__Bacteria;p__Actinobacteriota;c__Thermoleophilia;o__Solirubrobacterales;f__Solirubrobacteraceae;g__F1-60-MAGs163;s__	GCF_000175615.1	86.4315	0.01	Presence
SLM_MC1B_24-O09	2~4 cm	SAMN40274061	JBCJSV000000000	8772301	8290703	8287287	8287219	110314	344667	56.4046	16	131114	64555	0.640317	12.069	0	340	0.913313	d__Bacteria;p__Actinobacteriota;c__Thermoleophilia;o__Solirubrobacterales;f__Solirubrobacteraceae;g__F1-60-MAGs163;s__	2.85581e+06	d__Bacteria;p__Actinobacteriota;c__Thermoleophilia;o__Solirubrobacterales;f__Solirubrobacteraceae;g__F1-60-MAGs163;s__	GCF_003576185.1	87.691	0.01	Presence
SLM_MC1B_68-O08	6~8 cm	SAMN40274062	JBCJSW000000000	10374770	9908806	9879970	9879942	446997	1198956	67.4105	51	106020	38476	0.649553	52.735	0	1209	0.936032	d__Bacteria;p__Actinobacteriota;c__Thermoleophilia;o__Solirubrobacterales;f__Solirubrobacteraceae;g__F1-60-MAGs163;s__	2.27355e+06	d__Bacteria;p__Actinobacteriota;c__Thermoleophilia;o__Solirubrobacterales;f__Solirubrobacteraceae;g__F1-60-MAGs163;s__	GCF_015546965.1	85.9042	0.01	Presence
SLM_MC1B_24-P04	2~4 cm	SAMN40274063	JBCJSX000000000	9557772	9089030	9049322	9049174	387459	1052274	65.7661	60	84327	41451	0.650359	61.5385	0	1084	0.938826	d__Bacteria;p__Actinobacteriota;c__Thermoleophilia;o__Solirubrobacterales;f__Solirubrobacteraceae;g__F1-60-MAGs163;s__	1.70995e+06	d__Bacteria;p__Actinobacteriota;c__Thermoleophilia;o__Solirubrobacterales;f__Solirubrobacteraceae;g__F1-60-MAGs163;s__	GCF_001403775.1	87.1019	0	Presence
SLM_MC1B_68-G21	6~8 cm	SAMN40274064	JBCJSY000000000	7728800	7310733	7304258	7304252	197251	514333	66.2432	54	40741	15562	0.648733	19.5925	0	549	0.928653	d__Bacteria;p__Actinobacteriota;c__Thermoleophilia;o__Solirubrobacterales;f__Solirubrobacteraceae;g__F1-60-MAGs163;s__	2.62516e+06	d__Bacteria;p__Actinobacteriota;c__Thermoleophilia;o__Solirubrobacterales;f__Solirubrobacteraceae;g__F1-60-MAGs163;s__	GCF_003932855.1	87.5557	0.01	Presence
SLM_MC1B_68-O11	6~8 cm	SAMN40274065	JBCJSZ000000000	8083950	7664851	7657778	7657758	493536	1285280	70.0841	43	155164	67600	0.644856	54.3447	0	1268	0.937884	d__Bacteria;p__Actinobacteriota;c__Thermoleophilia;o__Solirubrobacterales;f__Solirubrobacteraceae;g__F1-60-MAGs163;s__	2.36505e+06	d__Bacteria;p__Actinobacteriota;c__Thermoleophilia;o__Solirubrobacterales;f__Solirubrobacteraceae;g__F1-60-MAGs163;s__	GCF_011761265.1	81.2968	0	Presence
SLM_MC1B_02-F10	0~2 cm	SAMN40274066	JBCJTA000000000	7313451	6940024	6927006	6926978	217237	569968	68.569	19	65101	48450	0.642138	42.849	0	575	0.928861	d__Bacteria;p__Actinobacteriota;c__Thermoleophilia;o__Solirubrobacterales;f__Solirubrobacteraceae;g__F1-60-MAGs163;s__	1.33018e+06	d__Bacteria;p__Actinobacteriota;c__Thermoleophilia;o__Solirubrobacterales;f__Solirubrobacteraceae;g__F1-60-MAGs163;s__	GCF_002741105.1	84.7601	0.01	Presence
SLM_MC1B_68-F18	6~8 cm	SAMN40274067	JBCJTB000000000	8146200	7719438	7712214	7712194	337407	1027818	58.9004	44	139916	58161	0.645101	51.7094	0	1044	0.933221	d__Bacteria;p__Actinobacteriota;c__Thermoleophilia;o__Solirubrobacterales;f__Solirubrobacteraceae;g__F1-60-MAGs163;s__	1.98768e+06	d__Bacteria;p__Actinobacteriota;c__Thermoleophilia;o__Solirubrobacterales;f__Solirubrobacteraceae;g__F1-60-MAGs163;s__	GCA_903959665.1	80.6531	0.42	Absence
SLM_MC1B_68-A22	6~8 cm	SAMN40274068	JBCJTC000000000	9958055	9324012	9308747	9308740	540200	1421887	67.1813	59	164502	46109	0.647722	52.849	0	1449	0.929143	d__Bacteria;p__Actinobacteriota;c__Thermoleophilia;o__Solirubrobacterales;f__Solirubrobacteraceae;g__F1-60-MAGs163;s__	2.69047e+06	d__Bacteria;p__Actinobacteriota;c__Thermoleophilia;o__Solirubrobacterales;f__Solirubrobacteraceae;g__F1-60-MAGs163;s__	GCA_001312805.1	82.1618	0.01	Presence
SLM_MC1B_24-E08	2~4 cm	SAMN40274069	JBCJTD000000000	8768958	8404177	8398433	8398383	206356	724820	51.0509	32	151143	46359	0.642769	29.0598	0	750	0.934537	d__Bacteria;p__Actinobacteriota;c__Thermoleophilia;o__Solirubrobacterales;f__Solirubrobacteraceae;g__F1-60-MAGs163;s__	2.49423e+06	d__Bacteria;p__Actinobacteriota;c__Thermoleophilia;o__Solirubrobacterales;f__Solirubrobacteraceae;g__F1-60-MAGs163;s__	GCF_016745095.1	81.9104	0.01	Absence
SLM_LV1_0208-N17	0.2~0.8 um	SAMN40274070	JBCJTE000000000	9309389	8786240	8772259	8772246	413408	1085950	67.7107	57	68261	39644	0.645769	47.151	0	1123	0.929002	d__Bacteria;p__Actinobacteriota;c__Thermoleophilia;o__Solirubrobacterales;f__Solirubrobacteraceae;g__F1-60-MAGs163;s__	2.30313e+06	d__Bacteria;p__Actinobacteriota;c__Thermoleophilia;o__Solirubrobacterales;f__Solirubrobacteraceae;g__F1-60-MAGs163;s__	GCF_018619475.1	81.5973	0.02	Absence
SLM_LV1_BS-I09	BulkSediment	SAMN40274071	JBCJTF000000000	7201297	6808726	6796726	6796726	510848	1312197	70.4499	50	154769	60223	0.6466	60.2564	0	1343	0.936822	d__Bacteria;p__Actinobacteriota;c__Thermoleophilia;o__Solirubrobacterales;f__Solirubrobacteraceae;g__F1-60-MAGs163;s__	2.17769e+06	d__Bacteria;p__Actinobacteriota;c__Thermoleophilia;o__Solirubrobacterales;f__Solirubrobacteraceae;g__F1-60-MAGs163;s__	GCF_004118935.1	84.0187	0.02	Presence
SLM_MC1B_68-O07	6~8 cm	SAMN40274072	JBCJTG000000000	8556062	8185691	8178663	8178657	391118	1109978	64.1228	40	125225	56567	0.645575	47.8632	0	1129	0.934131	d__Bacteria;p__Actinobacteriota;c__Thermoleophilia;o__Solirubrobacterales;f__Solirubrobacteraceae;g__F1-60-MAGs163;s__	2.31906e+06	d__Bacteria;p__Actinobacteriota;c__Thermoleophilia;o__Solirubrobacterales;f__Solirubrobacteraceae;g__F1-60-MAGs163;s__	GCF_013410945.1	83.0086	0.01	Presence
SLM_MC1B_24-E14	2~4 cm	SAMN40274073	JBCJTH000000000	10016401	9603442	9598722	9598706	295109	703434	76.3128	23	131115	112417	0.646278	34.9105	0	719	0.932865	d__Bacteria;p__Actinobacteriota;c__Thermoleophilia;o__Solirubrobacterales;f__Solirubrobacteraceae;g__F1-60-MAGs163;s__	2.01497e+06	d__Bacteria;p__Actinobacteriota;c__Thermoleophilia;o__Solirubrobacterales;f__Solirubrobacteraceae;g__F1-60-MAGs163;s__	GCA_018240265.1	82.1112	0	Absence
SLM_MC1B_46-A07	4~6 cm	SAMN40274074	JBCJTI000000000	11785930	11161380	11147642	11147639	492305	1310002	67.2694	49	151525	55747	0.649904	64.6724	0	1339	0.93634	d__Bacteria;p__Actinobacteriota;c__Thermoleophilia;o__Solirubrobacterales;f__Solirubrobacteraceae;g__F1-60-MAGs163;s__	2.0256e+06	d__Bacteria;p__Actinobacteriota;c__Thermoleophilia;o__Solirubrobacterales;f__Solirubrobacteraceae;g__F1-60-MAGs163;s__	GCF_004353225.1	81.1921	0.01	Presence
SLM_MC1B_24-F19	2~4 cm	SAMN40274075	JBCJTJ000000000	8585013	8236984	8232577	8232500	206531	713502	52.5836	49	93575	44798	0.646291	31.8182	0	734	0.927142	d__Bacteria;p__Actinobacteriota;c__Thermoleophilia;o__Solirubrobacterales;f__Solirubrobacteraceae;g__F1-60-MAGs163;s__	2.24243e+06	d__Bacteria;p__Actinobacteriota;c__Thermoleophilia;o__Solirubrobacterales;f__Solirubrobacteraceae;g__F1-60-MAGs163;s__	GCA_002255905.1	86.1934	0.01	Presence
SLM_MC1B_24-P07	2~4 cm	SAMN40274076	JBCJTK000000000	17491462	16575332	16570462	16570455	163106	523295	56.4795	28	64711	37123	0.649116	35.755	0	533	0.939982	d__Bacteria;p__Actinobacteriota;c__Thermoleophilia;o__Solirubrobacterales;f__Solirubrobacteraceae;g__F1-60-MAGs163;s__	1.46356e+06	d__Bacteria;p__Actinobacteriota;c__Thermoleophilia;o__Solirubrobacterales;f__Solirubrobacteraceae;g__F1-60-MAGs163;s__	GCA_013815505.1	81.4299	0.04	Absence
SLM_MC1B_24-P17	2~4 cm	SAMN40274077	JBCJTL000000000	8998544	8570834	8564945	8564941	305785	849663	62.8886	63	56529	21579	0.643089	38.0878	0	875	0.920463	d__Bacteria;p__Actinobacteriota;c__Thermoleophilia;o__Solirubrobacterales;f__Solirubrobacteraceae;g__F1-60-MAGs163;s__	2.2308e+06	d__Bacteria;p__Actinobacteriota;c__Thermoleophilia;o__Solirubrobacterales;f__Solirubrobacteraceae;g__F1-60-MAGs163;s__	GCF_000767165.1	82.9714	0.02	Absence
SLM_MC1B_24-J10	2~4 cm	SAMN40274078	JBCJTM000000000	8779821	8223596	8198725	8198698	357175	915235	70.3389	50	102279	37351	0.649951	45.1567	0.854701	958	0.928319	d__Bacteria;p__Actinobacteriota;c__Thermoleophilia;o__Solirubrobacterales;f__Solirubrobacteraceae;g__F1-60-MAGs163;s__	2.0268e+06	d__Bacteria;p__Actinobacteriota;c__Thermoleophilia;o__Solirubrobacterales;f__Solirubrobacteraceae;g__F1-60-MAGs163;s__	GCA_016794165.1	82.0352	0	Absence
SLM_MC1B_02-M08	0~2 cm	SAMN40274079	JBCJTN000000000	7937242	7480758	7476283	7476276	400642	1116537	65.8109	44	124035	41835	0.642663	46.4387	0	1144	0.926475	d__Bacteria;p__Actinobacteriota;c__Thermoleophilia;o__Solirubrobacterales;f__Solirubrobacteraceae;g__F1-60-MAGs163;s__	2.40432e+06	d__Bacteria;p__Actinobacteriota;c__Thermoleophilia;o__Solirubrobacterales;f__Solirubrobacteraceae;g__F1-60-MAGs163;s__	GCA_016462245.1	80.2512	0.38	Absence
SLM_LV1_BS-J17	BulkSediment	SAMN40274080	JBCJTO000000000	9786271	9198894	9189396	9189390	477396	1200807	72.1767	40	213619	47743	0.649412	45.7265	0	1222	0.932075	d__Bacteria;p__Actinobacteriota;c__Thermoleophilia;o__Solirubrobacterales;f__Solirubrobacteraceae;g__F1-60-MAGs163;s__	2.62606e+06	d__Bacteria;p__Actinobacteriota;c__Thermoleophilia;o__Solirubrobacterales;f__Solirubrobacteraceae;g__F1-60-MAGs163;s__	GCF_015864955.1	82.1579	0.01	Presence
SLM_MC1B_46-J03	4~6 cm	SAMN40274081	JBCJTP000000000	11752540	11161762	11155845	11155834	273516	743175	66.0681	41	104924	37607	0.649987	33.7607	0	777	0.923411	d__Bacteria;p__Actinobacteriota;c__Thermoleophilia;o__Solirubrobacterales;f__Solirubrobacteraceae;g__F1-60-MAGs163;s__	2.2013e+06	d__Bacteria;p__Actinobacteriota;c__Thermoleophilia;o__Solirubrobacterales;f__Solirubrobacteraceae;g__F1-60-MAGs163;s__	GCF_009299485.1	84.6373	0.01	Presence
SLM_MC1B_810-C17	8~10 cm	SAMN40274082	JBCJTQ000000000	7083966	6588273	6580621	6580561	470321	1306378	63.2408	60	168080	42513	0.649047	45.6897	0	1361	0.925943	d__Bacteria;p__Actinobacteriota;c__Thermoleophilia;o__Solirubrobacterales;f__Solirubrobacteraceae;g__F1-60-MAGs163;s__	2.85924e+06	d__Bacteria;p__Actinobacteriota;c__Thermoleophilia;o__Solirubrobacterales;f__Solirubrobacteraceae;g__F1-60-MAGs163;s__	GCA_001486445.1	86.3926	0	Presence
SLM_MC1B_24-C16	2~4 cm	SAMN40274083	JBCJTR000000000	9588433	9167118	9136731	9136637	377660	1181802	56.5663	57	68681	45044	0.652273	37.963	0	1228	0.914551	d__Bacteria;p__Actinobacteriota;c__Thermoleophilia;o__Solirubrobacterales;f__Solirubrobacteraceae;g__F1-60-MAGs163;s__	3.11304e+06	d__Bacteria;p__Actinobacteriota;c__Thermoleophilia;o__Solirubrobacterales;f__Solirubrobacteraceae;g__F1-60-MAGs163;s__	GCF_003344535.1	83.8406	0.01	Presence
SLM_MC1B_24-A22	2~4 cm	SAMN40274084	JBCJTS000000000	10029411	9605995	9600739	9600678	397461	1052481	67.6038	49	177623	36305	0.64914	33.9031	0	1094	0.930237	d__Bacteria;p__Actinobacteriota;c__Thermoleophilia;o__Solirubrobacterales;f__Solirubrobacteraceae;g__F1-60-MAGs163;s__	3.10438e+06	d__Bacteria;p__Actinobacteriota;c__Thermoleophilia;o__Solirubrobacterales;f__Solirubrobacteraceae;g__F1-60-MAGs163;s__	GCA_903959665.1	80.5897	0.33	Absence
SLM_MC1B_68-J05	6~8 cm	SAMN40274085	JBCJTT000000000	8899483	8423652	8399477	8399467	533444	1436731	67.4192	41	231573	96708	0.650226	56.8376	0	1462	0.926104	d__Bacteria;p__Actinobacteriota;c__Thermoleophilia;o__Solirubrobacterales;f__Solirubrobacteraceae;g__F1-60-MAGs163;s__	2.52778e+06	d__Bacteria;p__Actinobacteriota;c__Thermoleophilia;o__Solirubrobacterales;f__Solirubrobacteraceae;g__F1-60-MAGs163;s__	GCA_000063525.1	84.115	0	Presence
SLM_MC1B_24-I08	2~4 cm	SAMN40274086	JBCJTU000000000	9476087	9039349	9033932	9033909	202927	522257	70.8923	25	122835	68444	0.648344	17.2414	0	545	0.942726	d__Bacteria;p__Actinobacteriota;c__Thermoleophilia;o__Solirubrobacterales;f__Solirubrobacteraceae;g__F1-60-MAGs163;s__	3.02909e+06	d__Bacteria;p__Actinobacteriota;c__Thermoleophilia;o__Solirubrobacterales;f__Solirubrobacteraceae;g__F1-60-MAGs163;s__	GCA_016462245.1	80.5372	0.54	Absence
SLM_MC1B_46-G20	4~6 cm	SAMN40274087	JBCJTV000000000	7752632	7416028	7398237	7398231	440208	1298739	61.375	52	130461	42808	0.648877	57.7493	0	1295	0.934664	d__Bacteria;p__Actinobacteriota;c__Thermoleophilia;o__Solirubrobacterales;f__Solirubrobacteraceae;g__F1-60-MAGs163;s__	2.24893e+06	d__Bacteria;p__Actinobacteriota;c__Thermoleophilia;o__Solirubrobacterales;f__Solirubrobacteraceae;g__F1-60-MAGs163;s__	GCA_905181725.1	84.9617	0.01	Absence
SLM_MC1B_24-J21	2~4 cm	SAMN40274088	JBCJTW000000000	8357463	7864191	7833340	7833260	462706	1252714	64.823	72	110632	26861	0.644359	51.1966	0	1287	0.931193	d__Bacteria;p__Actinobacteriota;c__Thermoleophilia;o__Solirubrobacterales;f__Solirubrobacteraceae;g__F1-60-MAGs163;s__	2.44687e+06	d__Bacteria;p__Actinobacteriota;c__Thermoleophilia;o__Solirubrobacterales;f__Solirubrobacteraceae;g__F1-60-MAGs163;s__	GCF_015555045.1	85.3288	0.01	Presence
SLM_MC1B_24-A03	2~4 cm	SAMN40274089	JBCJTX000000000	8797022	8357859	8348995	8348975	296789	989256	54.5451	52	115185	39070	0.643434	51.567	0	1015	0.933732	d__Bacteria;p__Actinobacteriota;c__Thermoleophilia;o__Solirubrobacterales;f__Solirubrobacteraceae;g__F1-60-MAGs163;s__	1.91839e+06	d__Bacteria;p__Actinobacteriota;c__Thermoleophilia;o__Solirubrobacterales;f__Solirubrobacteraceae;g__F1-60-MAGs163;s__	GCF_003208335.1	83.6059	0.01	Presence
SLM_MC1B_24-J22	2~4 cm	SAMN40274090	JBCJTY000000000	9069285	8582880	8576874	8576796	181312	516226	68.3909	30	85883	33531	0.643619	10.698	0.854701	529	0.920273	d__Bacteria;p__Actinobacteriota;c__Thermoleophilia;o__Solirubrobacterales;f__Solirubrobacteraceae;g__F1-60-MAGs163;s__	4.82544e+06	d__Bacteria;p__Actinobacteriota;c__Thermoleophilia;o__Solirubrobacterales;f__Solirubrobacteraceae;g__F1-60-MAGs163;s__	GCA_903959665.1	79.9884	0.36	Absence
SLM_MC1B_24-I20	2~4 cm	SAMN40274091	JBCJTZ000000000	10870693	10275539	10272096	10271995	282370	911095	54.9638	46	113524	45304	0.642573	43.0769	0	912	0.931417	d__Bacteria;p__Actinobacteriota;c__Thermoleophilia;o__Solirubrobacterales;f__Solirubrobacteraceae;g__F1-60-MAGs163;s__	2.11504e+06	d__Bacteria;p__Actinobacteriota;c__Thermoleophilia;o__Solirubrobacterales;f__Solirubrobacteraceae;g__F1-60-MAGs163;s__	GCF_000738085.1	86.3422	0.01	Presence
SLM_MC1B_24-L06	2~4 cm	SAMN40274092	JBCJUA000000000	14756459	13961755	13941908	13941893	243877	629917	68.6921	36	89745	28113	0.649951	32.4074	0	652	0.944582	d__Bacteria;p__Actinobacteriota;c__Thermoleophilia;o__Solirubrobacterales;f__Solirubrobacteraceae;g__F1-60-MAGs163;s__	1.94374e+06	d__Bacteria;p__Actinobacteriota;c__Thermoleophilia;o__Solirubrobacterales;f__Solirubrobacteraceae;g__F1-60-MAGs163;s__	GCA_017650365.1	82.6958	0.03	Absence
SLM_MC1B_46-I10	4~6 cm	SAMN40274093	JBCJUB000000000	9628688	9191402	9184064	9184047	309883	799562	69.8914	38	76447	31829	0.644245	45.0712	0	836	0.941297	d__Bacteria;p__Actinobacteriota;c__Thermoleophilia;o__Solirubrobacterales;f__Solirubrobacteraceae;g__F1-60-MAGs163;s__	1.774e+06	d__Bacteria;p__Actinobacteriota;c__Thermoleophilia;o__Solirubrobacterales;f__Solirubrobacteraceae;g__F1-60-MAGs163;s__	GCA_017650365.1	81.8858	0.01	Absence
SLM_MC1B_24-O13	2~4 cm	SAMN40274094	JBCJUC000000000	8868904	8375249	8367048	8366921	396518	960369	72.6849	30	214466	82165	0.650406	51.7241	0	957	0.935693	d__Bacteria;p__Actinobacteriota;c__Thermoleophilia;o__Solirubrobacterales;f__Solirubrobacteraceae;g__F1-60-MAGs163;s__	1.85671e+06	d__Bacteria;p__Actinobacteriota;c__Thermoleophilia;o__Solirubrobacterales;f__Solirubrobacteraceae;g__F1-60-MAGs163;s__	GCA_018971605.1	83.9212	0.02	Presence
SLM_MC1B_24-M22	2~4 cm	SAMN40274095	JBCJUD000000000	9372987	8953608	8936500	8936414	488411	1182126	72.7712	73	51100	25582	0.632025	49.1379	0	1222	0.930533	d__Bacteria;p__Actinobacteriota;c__Thermoleophilia;o__Gaiellales;f__F1-60-MAGs149;g__F1-60-MAGs149;s__	2.40573e+06	d__Bacteria;p__Actinobacteriota;c__Thermoleophilia;o__Gaiellales;f__F1-60-MAGs149;g__F1-60-MAGs149;s__	GCA_003862195.1	80.0083	0.01	Absence
SLM_MC1B_68-N04	6~8 cm	SAMN40274096	JBCJUE000000000	8000598	7539758	7535056	7535052	570598	1503135	67.4935	79	136145	37396	0.627487	71.8103	1.2931	1593	0.921906	d__Bacteria;p__Actinobacteriota;c__Thermoleophilia;o__Gaiellales;f__F1-60-MAGs149;g__F1-60-MAGs149;s__	2.0932e+06	d__Bacteria;p__Actinobacteriota;c__Thermoleophilia;o__Gaiellales;f__F1-60-MAGs149;g__F1-60-MAGs149;s__	GCF_001570865.1	88.2295	0.01	Presence
SLM_LV1_BS-E16	BulkSediment	SAMN40274097	JBCJUF000000000	7078036	6769674	6766003	6765994	116503	287204	72.7908	19	51033	22538	0.628135	26.5805	0.431034	330	0.929789	d__Bacteria;p__Actinobacteriota;c__Thermoleophilia;o__Gaiellales;f__F1-60-MAGs149;g__F1-60-MAGs149;s__	1.08051e+06	d__Bacteria;p__Actinobacteriota;c__Thermoleophilia;o__Gaiellales;f__F1-60-MAGs149;g__F1-60-MAGs149;s__	GCA_903873565.1	78.6735	0.29	Absence
SLM_MC1B_02-G08	0~2 cm	SAMN40274098	JBCJUG000000000	8107874	7620057	7615375	7615372	628040	1698596	65.0375	71	129012	46166	0.627051	60.3448	0	1787	0.922736	d__Bacteria;p__Actinobacteriota;c__Thermoleophilia;o__Gaiellales;f__F1-60-MAGs149;g__F1-60-MAGs149;s__	2.81482e+06	d__Bacteria;p__Actinobacteriota;c__Thermoleophilia;o__Gaiellales;f__F1-60-MAGs149;g__F1-60-MAGs149;s__	GCF_900156755.1	84.4433	0.01	Presence
SLM_MC1B_68-A23	6~8 cm	SAMN40274099	JBCJUH000000000	9373971	8837170	8831486	8831459	321773	817845	69.5369	67	69397	16937	0.625972	39.9138	0	904	0.916313	d__Bacteria;p__Actinobacteriota;c__Thermoleophilia;o__Gaiellales;f__F1-60-MAGs149;g__F1-60-MAGs149;s__	2.04903e+06	d__Bacteria;p__Actinobacteriota;c__Thermoleophilia;o__Gaiellales;f__F1-60-MAGs149;g__F1-60-MAGs149;s__	GCA_903930745.1	78.6136	0	Absence
SLM_MC1B_810-A19	8~10 cm	SAMN40274100	JBCJUI000000000	8231145	7810827	7799782	7799775	420424	1211168	61.5939	61	81413	56610	0.626313	70	0.0862069	1302	0.9205	d__Bacteria;p__Actinobacteriota;c__Thermoleophilia;o__Gaiellales;f__F1-60-MAGs149;g__F1-60-MAGs149;s__	1730240	d__Bacteria;p__Actinobacteriota;c__Thermoleophilia;o__Gaiellales;f__F1-60-MAGs149;g__F1-60-MAGs149;s__	GCF_004403305.1	85.906	0	Presence
SLM_MC1B_46-O10	4~6 cm	SAMN40274101	JBCJUJ000000000	9333545	8810128	8804544	8804423	370057	997176	64.4437	55	87504	43723	0.625558	40.4454	0	1060	0.92133	d__Bacteria;p__Actinobacteriota;c__Thermoleophilia;o__Gaiellales;f__F1-60-MAGs149;g__F1-60-MAGs149;s__	2.46549e+06	d__Bacteria;p__Actinobacteriota;c__Thermoleophilia;o__Gaiellales;f__F1-60-MAGs149;g__F1-60-MAGs149;s__	GCF_002929295.1	86.3313	0.01	Presence
SLM_MC1B_46-I22	4~6 cm	SAMN40274102	JBCJUK000000000	6997870	6709165	6701915	6701912	369204	1002536	65.4304	66	87293	30120	0.625866	52.4425	0	1085	0.913726	d__Bacteria;p__Actinobacteriota;c__Thermoleophilia;o__Gaiellales;f__F1-60-MAGs149;g__F1-60-MAGs149;s__	1.91169e+06	d__Bacteria;p__Actinobacteriota;c__Thermoleophilia;o__Gaiellales;f__F1-60-MAGs149;g__F1-60-MAGs149;s__	GCA_013360575.1	83.1934	0.02	Presence
SLM_MC1B_68-K16	6~8 cm	SAMN40274103	JBCJUL000000000	9724960	9092879	9090324	9090306	162444	508225	56.5656	34	41278	23440	0.615773	28.4483	0	548	0.915061	d__Bacteria;p__Actinobacteriota;c__Thermoleophilia;o__Gaiellales;f__F1-60-MAGs149;g__F1-60-MAGs149;s__	1.78649e+06	d__Bacteria;p__Actinobacteriota;c__Thermoleophilia;o__Gaiellales;f__F1-60-MAGs149;g__F1-60-MAGs149;s__	GCF_001314225.1	86.0003	0.01	Absence
SLM_MC1B_68-N03	6~8 cm	SAMN40274104	JBCJUM000000000	7835081	7417611	7410382	7410370	549639	1506346	65.2271	86	88009	34360	0.628389	61.9253	0	1608	0.923063	d__Bacteria;p__Actinobacteriota;c__Thermoleophilia;o__Gaiellales;f__F1-60-MAGs149;g__F1-60-MAGs149;s__	2.43252e+06	d__Bacteria;p__Actinobacteriota;c__Thermoleophilia;o__Gaiellales;f__F1-60-MAGs149;g__F1-60-MAGs149;s__	GCA_018003035.1	85.0607	0.01	Presence
SLM_MC1B_68-A02	6~8 cm	SAMN40274105	JBCJUN000000000	9114499	8618187	8607926	8607922	619266	1626061	67.2646	70	117520	48299	0.62873	66.2644	0.431034	1734	0.924758	d__Bacteria;p__Actinobacteriota;c__Thermoleophilia;o__Gaiellales;f__F1-60-MAGs149;g__F1-60-MAGs149;s__	2.4539e+06	d__Bacteria;p__Actinobacteriota;c__Thermoleophilia;o__Gaiellales;f__F1-60-MAGs149;g__F1-60-MAGs149;s__	GCA_019116525.1	81.1478	0.01	Absence
SLM_MC1B_24-G02	2~4 cm	SAMN40274106	JBCJUO000000000	6621586	6350660	6348177	6348137	441559	1395087	57.4809	60	112172	50563	0.625569	57.0402	0	1489	0.91813	d__Bacteria;p__Actinobacteriota;c__Thermoleophilia;o__Gaiellales;f__F1-60-MAGs149;g__F1-60-MAGs149;s__	2.44579e+06	d__Bacteria;p__Actinobacteriota;c__Thermoleophilia;o__Gaiellales;f__F1-60-MAGs149;g__F1-60-MAGs149;s__	GCA_003559555.1	80.376	0.01	Absence
SLM_LV1_BS-G11	BulkSediment	SAMN40274107	JBCJUP000000000	6902401	6516493	6511840	6511805	258696	741250	60.7462	71	47488	17347	0.627367	23.2759	0	829	0.908243	d__Bacteria;p__Actinobacteriota;c__Thermoleophilia;o__Gaiellales;f__F1-60-MAGs149;g__F1-60-MAGs149;s__	3.18463e+06	d__Bacteria;p__Actinobacteriota;c__Thermoleophilia;o__Gaiellales;f__F1-60-MAGs149;g__F1-60-MAGs149;s__	GCA_016462095.1	79.3764	0.34	Absence
SLM_MC1B_810-A06	8~10 cm	SAMN40274108	JBCJUQ000000000	10256736	9766769	9760759	9760742	368082	965094	65.6858	66	83630	29993	0.622608	33.6207	0	1019	0.913672	d__Bacteria;p__Actinobacteriota;c__Thermoleophilia;o__Gaiellales;f__F1-60-MAGs149;g__F1-60-MAGs149;s__	2.87054e+06	d__Bacteria;p__Actinobacteriota;c__Thermoleophilia;o__Gaiellales;f__F1-60-MAGs149;g__F1-60-MAGs149;s__	GCF_002091985.1	86.764	0	Presence
SLM_MC1B_24-O17	2~4 cm	SAMN40274109	JBCJUR000000000	8439104	8007660	8001795	8001699	656592	1633208	71.3843	68	113340	37799	0.627464	69.3966	0.431034	1734	0.91863	d__Bacteria;p__Actinobacteriota;c__Thermoleophilia;o__Gaiellales;f__F1-60-MAGs149;g__F1-60-MAGs149;s__	2.35344e+06	d__Bacteria;p__Actinobacteriota;c__Thermoleophilia;o__Gaiellales;f__F1-60-MAGs149;g__F1-60-MAGs149;s__	GCF_002797875.1	86.2426	0.01	Presence
SLM_MC1B_24-M15	2~4 cm	SAMN40274110	JBCJUS000000000	8478060	8013612	8007034	8006946	204532	486730	71.734	45	46392	18283	0.62568	20.4023	0	539	0.917225	d__Bacteria;p__Actinobacteriota;c__Thermoleophilia;o__Gaiellales;f__F1-60-MAGs149;g__F1-60-MAGs149;s__	2.38566e+06	d__Bacteria;p__Actinobacteriota;c__Thermoleophilia;o__Gaiellales;f__F1-60-MAGs149;g__F1-60-MAGs149;s__	GCF_000971115.1	85.0853	0.02	Presence
SLM_MC1B_68-J23	6~8 cm	SAMN40274111	JBCJUT000000000	10084977	9549947	9540600	9540588	383604	1122806	60.6705	80	51805	26380	0.626006	49.4253	0	1215	0.923207	d__Bacteria;p__Actinobacteriota;c__Thermoleophilia;o__Gaiellales;f__F1-60-MAGs149;g__F1-60-MAGs149;s__	2.27172e+06	d__Bacteria;p__Actinobacteriota;c__Thermoleophilia;o__Gaiellales;f__F1-60-MAGs149;g__F1-60-MAGs149;s__	GCA_016462095.1	79.5954	0.36	Absence
SLM_MC1B_68-G02	6~8 cm	SAMN40274112	JBCJUU000000000	8220307	7714202	7709357	7709337	357938	1027995	61.508	68	96373	34206	0.625819	45.0431	0	1111	0.91411	d__Bacteria;p__Actinobacteriota;c__Thermoleophilia;o__Gaiellales;f__F1-60-MAGs149;g__F1-60-MAGs149;s__	2.28225e+06	d__Bacteria;p__Actinobacteriota;c__Thermoleophilia;o__Gaiellales;f__F1-60-MAGs149;g__F1-60-MAGs149;s__	GCF_004337705.1	84.0762	0.01	Presence
SLM_MC1B_68-D11	6~8 cm	SAMN40274113	JBCJUV000000000	9647023	9100229	9095373	9095371	456502	1190739	66.6723	82	80799	21614	0.626065	58.8218	0	1293	0.918656	d__Bacteria;p__Actinobacteriota;c__Thermoleophilia;o__Gaiellales;f__F1-60-MAGs149;g__F1-60-MAGs149;s__	2.02431e+06	d__Bacteria;p__Actinobacteriota;c__Thermoleophilia;o__Gaiellales;f__F1-60-MAGs149;g__F1-60-MAGs149;s__	GCF_010667645.1	85.7548	0.01	Presence
SLM_LV1_BS-B10	BulkSediment	SAMN40274114	JBCJUW000000000	8211590	7717539	7703446	7703440	403935	1273989	56.251	83	92595	30460	0.625811	54.0517	0.431034	1348	0.920634	d__Bacteria;p__Actinobacteriota;c__Thermoleophilia;o__Gaiellales;f__F1-60-MAGs149;g__F1-60-MAGs149;s__	2.35698e+06	d__Bacteria;p__Actinobacteriota;c__Thermoleophilia;o__Gaiellales;f__F1-60-MAGs149;g__F1-60-MAGs149;s__	GCF_002931055.1	85.1086	0.01	Presence
SLM_MC1B_68-A15	6~8 cm	SAMN40274115	JBCJUX000000000	9430160	8896709	8891593	8891545	565136	1343147	73.0405	84	67618	27749	0.626704	44.8276	0	1435	0.920146	d__Bacteria;p__Actinobacteriota;c__Thermoleophilia;o__Gaiellales;f__F1-60-MAGs149;g__F1-60-MAGs149;s__	2.99625e+06	d__Bacteria;p__Actinobacteriota;c__Thermoleophilia;o__Gaiellales;f__F1-60-MAGs149;g__F1-60-MAGs149;s__	GCF_001570865.1	88.2295	0	Presence
SLM_MC1B_68-F21	6~8 cm	SAMN40274116	JBCJUY000000000	8701244	8197557	8189476	8189472	463800	1193027	68.7081	81	98768	23468	0.627987	55.9626	0	1297	0.924402	d__Bacteria;p__Actinobacteriota;c__Thermoleophilia;o__Gaiellales;f__F1-60-MAGs149;g__F1-60-MAGs149;s__	2.13183e+06	d__Bacteria;p__Actinobacteriota;c__Thermoleophilia;o__Gaiellales;f__F1-60-MAGs149;g__F1-60-MAGs149;s__	GCA_016462095.1	79.3034	0.37	Absence
SLM_MC1B_810-D06	8~10 cm	SAMN40274117	JBCJUZ000000000	7435620	6815089	6810659	6810555	560450	1495192	64.8778	72	108255	46904	0.627935	65.702	0.287356	1582	0.927851	d__Bacteria;p__Actinobacteriota;c__Thermoleophilia;o__Gaiellales;f__F1-60-MAGs149;g__F1-60-MAGs149;s__	2.27572e+06	d__Bacteria;p__Actinobacteriota;c__Thermoleophilia;o__Gaiellales;f__F1-60-MAGs149;g__F1-60-MAGs149;s__	GCF_009827655.1	80.0083	0.01	Absence
SLM_MC1B_24-G17	2~4 cm	SAMN40274118	JBCJVA000000000	7954980	7552816	7549023	7549018	255697	630526	71.8592	52	41180	22261	0.62704	28.3046	0	673	0.923963	d__Bacteria;p__Actinobacteriota;c__Thermoleophilia;o__Gaiellales;f__F1-60-MAGs149;g__F1-60-MAGs149;s__	2.22765e+06	d__Bacteria;p__Actinobacteriota;c__Thermoleophilia;o__Gaiellales;f__F1-60-MAGs149;g__F1-60-MAGs149;s__	GCA_016875695.1	81.96	0.01	Absence
SLM_MC1B_68-M03	6~8 cm	SAMN40274119	JBCJVB000000000	11388001	10778434	10776022	10776022	358486	1141886	56.1186	67	152606	33931	0.625475	46.8391	0	1215	0.917783	d__Bacteria;p__Actinobacteriota;c__Thermoleophilia;o__Gaiellales;f__F1-60-MAGs149;g__F1-60-MAGs149;s__	2.43789e+06	d__Bacteria;p__Actinobacteriota;c__Thermoleophilia;o__Gaiellales;f__F1-60-MAGs149;g__F1-60-MAGs149;s__	GCA_001312805.1	80.1633	0	Absence
SLM_MC1B_810-A02	8~10 cm	SAMN40274120	JBCJVC000000000	9316757	8894202	8890213	8890190	594161	1553965	67.8881	93	76934	28981	0.626507	68.1034	0	1663	0.918395	d__Bacteria;p__Actinobacteriota;c__Thermoleophilia;o__Gaiellales;f__F1-60-MAGs149;g__F1-60-MAGs149;s__	2.28177e+06	d__Bacteria;p__Actinobacteriota;c__Thermoleophilia;o__Gaiellales;f__F1-60-MAGs149;g__F1-60-MAGs149;s__	GCF_003946405.1	85.3788	0.01	Presence
SLM_LV1_BS-F17	BulkSediment	SAMN40274121	JBCJVD000000000	9214173	8589726	8583729	8583685	153175	330607	77.4308	22	39210	23032	0.631145	25	0	380	0.913005	d__Bacteria;p__Actinobacteriota;c__Thermoleophilia;o__Gaiellales;f__F1-60-MAGs149;g__F1-60-MAGs149;s__	1322428	d__Bacteria;p__Actinobacteriota;c__Thermoleophilia;o__Gaiellales;f__F1-60-MAGs149;g__F1-60-MAGs149;s__	GCA_016462095.1	80.5109	0.37	Absence
SLM_LV1_BS-B19	BulkSediment	SAMN40274122	JBCJVE000000000	11887106	11253736	11250591	11250578	171974	493949	60.9049	31	68303	32832	0.617562	18.9655	0	540	0.920148	d__Bacteria;p__Actinobacteriota;c__Thermoleophilia;o__Gaiellales;f__F1-60-MAGs149;g__F1-60-MAGs149;s__	2.60446e+06	d__Bacteria;p__Actinobacteriota;c__Thermoleophilia;o__Gaiellales;f__F1-60-MAGs149;g__F1-60-MAGs149;s__	GCF_014651995.1	81.097	0.01	Absence
SLM_LV1_BS-C19	BulkSediment	SAMN40274123	JBCJVF000000000	10107471	9591735	9587413	9587374	437674	1216037	63.4613	73	79718	28213	0.630057	48.9737	0.431034	1291	0.918988	d__Bacteria;p__Actinobacteriota;c__Thermoleophilia;o__Gaiellales;f__F1-60-MAGs149;g__F1-60-MAGs149;s__	2.48304e+06	d__Bacteria;p__Actinobacteriota;c__Thermoleophilia;o__Gaiellales;f__F1-60-MAGs149;g__F1-60-MAGs149;s__	GCF_010667655.1	84.9895	0.01	Presence
SLM_LV1_BS-D23	BulkSediment	SAMN40274124	JBCJVG000000000	9768501	9252429	9249273	9249271	586203	1599747	65.9844	72	115203	55903	0.626218	62.1408	0.862069	1696	0.919295	d__Bacteria;p__Actinobacteriota;c__Thermoleophilia;o__Gaiellales;f__F1-60-MAGs149;g__F1-60-MAGs149;s__	2.57439e+06	d__Bacteria;p__Actinobacteriota;c__Thermoleophilia;o__Gaiellales;f__F1-60-MAGs149;g__F1-60-MAGs149;s__	GCA_902778135.1	80.0339	0.01	Absence
SLM_MC1B_68-A01	6~8 cm	SAMN40274125	JBCJVH000000000	8391116	7899431	7895238	7895232	519667	1498716	60.6414	101	84435	24689	0.625892	70.9832	0.0862069	1603	0.923055	d__Bacteria;p__Actinobacteriota;c__Thermoleophilia;o__Gaiellales;f__F1-60-MAGs149;g__F1-60-MAGs149;s__	2.11137e+06	d__Bacteria;p__Actinobacteriota;c__Thermoleophilia;o__Gaiellales;f__F1-60-MAGs149;g__F1-60-MAGs149;s__	GCF_900217815.1	84.493	0	Presence
SLM_LV1_BS-A21	BulkSediment	SAMN40274126	JBCJVI000000000	7033158	6688728	6685196	6685194	481967	1214092	70.6989	63	108412	34234	0.627853	64.3309	0	1305	0.923856	d__Bacteria;p__Actinobacteriota;c__Thermoleophilia;o__Gaiellales;f__F1-60-MAGs149;g__F1-60-MAGs149;s__	1.88726e+06	d__Bacteria;p__Actinobacteriota;c__Thermoleophilia;o__Gaiellales;f__F1-60-MAGs149;g__F1-60-MAGs149;s__	GCF_010667645.1	85.7548	0.01	Presence
SLM_MC1B_68-C04	6~8 cm	SAMN40274127	JBCJVJ000000000	7882881	7399243	7394192	7394192	122740	319636	65.8584	35	32075	12334	0.62558	13.5345	0	353	0.900418	d__Bacteria;p__Actinobacteriota;c__Thermoleophilia;o__Gaiellales;f__F1-60-MAGs149;g__F1-60-MAGs149;s__	2.36164e+06	d__Bacteria;p__Actinobacteriota;c__Thermoleophilia;o__Gaiellales;f__F1-60-MAGs149;g__F1-60-MAGs149;s__	GCF_007679035.1	81.9352	0.01	Absence
SLM_LV1_BS-J03	BulkSediment	SAMN40274128	JBCJVK000000000	8998010	8376170	8371462	8371332	241744	700717	57.2894	83	28186	11950	0.623116	21.8678	0.431034	793	0.921252	d__Bacteria;p__Actinobacteriota;c__Thermoleophilia;o__Gaiellales;f__F1-60-MAGs149;g__F1-60-MAGs149;s__	3.20433e+06	d__Bacteria;p__Actinobacteriota;c__Thermoleophilia;o__Gaiellales;f__F1-60-MAGs149;g__F1-60-MAGs149;s__	GCA_016649925.1	80.1566	0.01	Absence
SLM_LV1_BS-F03	BulkSediment	SAMN40274129	JBCJVL000000000	14055760	13400889	13395807	13395801	202055	566610	61.7506	71	34265	11362	0.625757	33.0721	0	618	0.909199	d__Bacteria;p__Actinobacteriota;c__Thermoleophilia;o__Gaiellales;f__F1-60-MAGs149;g__F1-60-MAGs149;s__	1.71326e+06	d__Bacteria;p__Actinobacteriota;c__Thermoleophilia;o__Gaiellales;f__F1-60-MAGs149;g__F1-60-MAGs149;s__	GCF_003696205.1	86.3606	0.01	Presence
SLM_MC1B_24-O04	2~4 cm	SAMN40274130	JBCJVM000000000	7841218	7403755	7400047	7399961	494105	1348514	64.4163	90	76937	29590	0.626544	53.7069	0	1467	0.915577	d__Bacteria;p__Actinobacteriota;c__Thermoleophilia;o__Gaiellales;f__F1-60-MAGs149;g__F1-60-MAGs149;s__	2.51088e+06	d__Bacteria;p__Actinobacteriota;c__Thermoleophilia;o__Gaiellales;f__F1-60-MAGs149;g__F1-60-MAGs149;s__	GCF_000421445.1	83.6901	0.02	Presence
SLM_MC1B_68-B18	6~8 cm	SAMN40274131	JBCJVN000000000	10378843	9767576	9755096	9755083	351584	994335	63.8976	66	77936	27929	0.626178	45.4023	3.44828	1113	0.916848	d__Bacteria;p__Actinobacteriota;c__Thermoleophilia;o__Gaiellales;f__F1-60-MAGs149;g__F1-60-MAGs149;s__	2.19005e+06	d__Bacteria;p__Actinobacteriota;c__Thermoleophilia;o__Gaiellales;f__F1-60-MAGs149;g__F1-60-MAGs149;s__	GCA_016462095.1	79.2606	0.34	Absence
SLM_MC1B_68-E17	6~8 cm	SAMN40274132	JBCJVO000000000	9373977	8875557	8868163	8868152	475072	1351864	63.2145	62	136932	44701	0.626779	56.0345	0	1440	0.918518	d__Bacteria;p__Actinobacteriota;c__Thermoleophilia;o__Gaiellales;f__F1-60-MAGs149;g__F1-60-MAGs149;s__	2.41256e+06	d__Bacteria;p__Actinobacteriota;c__Thermoleophilia;o__Gaiellales;f__F1-60-MAGs149;g__F1-60-MAGs149;s__	GCA_001045575.1	84.2392	0.01	Presence
SLM_MC1B_68-M18	6~8 cm	SAMN40274133	JBCJVP000000000	7885525	7511277	7509559	7509556	202766	597940	61.5513	26	98315	61587	0.628503	13.7931	0	645	0.92765	d__Bacteria;p__Actinobacteriota;c__Thermoleophilia;o__Gaiellales;f__F1-60-MAGs149;g__F1-60-MAGs149;s__	4.33507e+06	d__Bacteria;p__Actinobacteriota;c__Thermoleophilia;o__Gaiellales;f__F1-60-MAGs149;g__F1-60-MAGs149;s__	GCA_016462095.1	78.7521	0.39	Absence
SLM_MC1B_810-C19	8~10 cm	SAMN40274134	JBCJVQ000000000	6785250	6287107	6281836	6281775	546103	1542034	62.5427	68	95264	43451	0.62687	71.7098	0.431034	1632	0.91863	d__Bacteria;p__Actinobacteriota;c__Thermoleophilia;o__Gaiellales;f__F1-60-MAGs149;g__F1-60-MAGs149;s__	2.15038e+06	d__Bacteria;p__Actinobacteriota;c__Thermoleophilia;o__Gaiellales;f__F1-60-MAGs149;g__F1-60-MAGs149;s__	GCA_001312805.1	82.3842	0.01	Presence
SLM_MC1B_68-P17	6~8 cm	SAMN40274135	JBCJVR000000000	13106720	12501502	12483608	12483600	474419	1309780	64.2088	74	76788	36117	0.625596	62.3563	0	1422	0.916726	d__Bacteria;p__Actinobacteriota;c__Thermoleophilia;o__Gaiellales;f__F1-60-MAGs149;g__F1-60-MAGs149;s__	2.10048e+06	d__Bacteria;p__Actinobacteriota;c__Thermoleophilia;o__Gaiellales;f__F1-60-MAGs149;g__F1-60-MAGs149;s__	GCA_017990495.1	82.8595	0.01	Presence
SLM_LV1_BS-A03	BulkSediment	SAMN40274136	JBCJVS000000000	8108619	7719917	7713859	7713832	651102	1803763	63.8145	103	111954	32544	0.627488	81.9684	0	1922	0.923947	d__Bacteria;p__Actinobacteriota;c__Thermoleophilia;o__Gaiellales;f__F1-60-MAGs149;g__F1-60-MAGs149;s__	2.20056e+06	d__Bacteria;p__Actinobacteriota;c__Thermoleophilia;o__Gaiellales;f__F1-60-MAGs149;g__F1-60-MAGs149;s__	GCA_001312805.1	82.3842	0.01	Presence
SLM_MC1B_24-C14	2~4 cm	SAMN40274137	JBCJVT000000000	9222780	8749784	8740725	8740697	428928	1209256	63.8464	46	94087	46823	0.626498	54.023	0	1324	0.920668	d__Bacteria;p__Actinobacteriota;c__Thermoleophilia;o__Gaiellales;f__F1-60-MAGs149;g__F1-60-MAGs149;s__	2.23841e+06	d__Bacteria;p__Actinobacteriota;c__Thermoleophilia;o__Gaiellales;f__F1-60-MAGs149;g__F1-60-MAGs149;s__	GCA_001312805.1	80.0083	0.01	Absence
SLM_MC1B_24-F05	2~4 cm	SAMN40274138	JBCJVU000000000	9293966	8935522	8929690	8929680	366590	949449	68.1773	59	93015	24142	0.626365	52.658	0.431034	1022	0.914635	d__Bacteria;p__Actinobacteriota;c__Thermoleophilia;o__Gaiellales;f__F1-60-MAGs149;g__F1-60-MAGs149;s__	1.80305e+06	d__Bacteria;p__Actinobacteriota;c__Thermoleophilia;o__Gaiellales;f__F1-60-MAGs149;g__F1-60-MAGs149;s__	GCA_903959665.1	85.538	0.03	Presence
SLM_MC1B_24-C19	2~4 cm	SAMN40274139	JBCJVV000000000	6929192	6632964	6630305	6630265	346362	1076264	57.7075	60	109811	34960	0.624528	51.8678	0	1143	0.922252	d__Bacteria;p__Actinobacteriota;c__Thermoleophilia;o__Gaiellales;f__F1-60-MAGs149;g__F1-60-MAGs149;s__	2.07501e+06	d__Bacteria;p__Actinobacteriota;c__Thermoleophilia;o__Gaiellales;f__F1-60-MAGs149;g__F1-60-MAGs149;s__	GCA_003221085.1	80.0595	0	Absence
SLM_MC1B_24-L09	2~4 cm	SAMN40274140	JBCJVW000000000	10437940	9850907	9839858	9839749	421498	1086822	66.7419	84	73140	25365	0.623356	55.1929	0	1198	0.913613	d__Bacteria;p__Actinobacteriota;c__Thermoleophilia;o__Gaiellales;f__F1-60-MAGs149;g__F1-60-MAGs149;s__	1.96913e+06	d__Bacteria;p__Actinobacteriota;c__Thermoleophilia;o__Gaiellales;f__F1-60-MAGs149;g__F1-60-MAGs149;s__	GCF_900411315.1	85.7938	0.02	Presence
SLM_MC1B_68-P06	6~8 cm	SAMN40274141	JBCJVX000000000	9006275	8609753	8607042	8607030	319989	1030794	55.1629	65	71805	25191	0.627107	50.9339	1.2931	1116	0.922736	d__Bacteria;p__Actinobacteriota;c__Thermoleophilia;o__Gaiellales;f__F1-60-MAGs149;g__F1-60-MAGs149;s__	2.02379e+06	d__Bacteria;p__Actinobacteriota;c__Thermoleophilia;o__Gaiellales;f__F1-60-MAGs149;g__F1-60-MAGs149;s__	GCA_001486445.1	85.052	0.01	Presence
SLM_LV1_BS-F08	BulkSediment	SAMN40274142	JBCJVY000000000	12772849	12254429	12249664	12249653	267764	705776	66.5938	60	47831	17982	0.626992	41.8103	0.143678	784	0.907294	d__Bacteria;p__Actinobacteriota;c__Thermoleophilia;o__Gaiellales;f__F1-60-MAGs149;g__F1-60-MAGs149;s__	1.68804e+06	d__Bacteria;p__Actinobacteriota;c__Thermoleophilia;o__Gaiellales;f__F1-60-MAGs149;g__F1-60-MAGs149;s__	GCF_013450155.1	84.761	0.01	Presence
SLM_MC1B_68-B22	6~8 cm	SAMN40274143	JBCJVZ000000000	9546956	8978892	8972683	8972671	399051	1093468	63.8007	44	110409	58451	0.625615	49.1379	0	1168	0.908939	d__Bacteria;p__Actinobacteriota;c__Thermoleophilia;o__Gaiellales;f__F1-60-MAGs149;g__F1-60-MAGs149;s__	2.2253e+06	d__Bacteria;p__Actinobacteriota;c__Thermoleophilia;o__Gaiellales;f__F1-60-MAGs149;g__F1-60-MAGs149;s__	GCA_001312805.1	84.7601	0.01	Presence
SLM_MC1B_68-K10	6~8 cm	SAMN40274144	JBCJWA000000000	6670281	6323592	6320458	6320392	241457	652702	64.2059	62	44602	17835	0.62165	40.5172	0	727	0.911454	d__Bacteria;p__Actinobacteriota;c__Thermoleophilia;o__Gaiellales;f__F1-60-MAGs149;g__F1-60-MAGs149;s__	1.61092e+06	d__Bacteria;p__Actinobacteriota;c__Thermoleophilia;o__Gaiellales;f__F1-60-MAGs149;g__F1-60-MAGs149;s__	GCF_018613995.1	85.0132	0.01	Presence
SLM_MC1B_68-A20	6~8 cm	SAMN40274145	JBCJWB000000000	11275898	10702491	10690309	10690296	401025	1162700	59.6317	87	79165	23328	0.628884	48.7356	0	1271	0.915857	d__Bacteria;p__Actinobacteriota;c__Thermoleophilia;o__Gaiellales;f__F1-60-MAGs149;g__F1-60-MAGs149;s__	2.38573e+06	d__Bacteria;p__Actinobacteriota;c__Thermoleophilia;o__Gaiellales;f__F1-60-MAGs149;g__F1-60-MAGs149;s__	GCF_900105025.1	85.6106	0.01	Presence
SLM_MC1B_24-M21	2~4 cm	SAMN40274146	JBCJWC000000000	7433043	7030458	7019826	7019764	399956	974001	71.6538	51	105723	33721	0.629225	30.8908	0	1069	0.924692	d__Bacteria;p__Actinobacteriota;c__Thermoleophilia;o__Gaiellales;f__F1-60-MAGs149;g__F1-60-MAGs149;s__	3.15305e+06	d__Bacteria;p__Actinobacteriota;c__Thermoleophilia;o__Gaiellales;f__F1-60-MAGs149;g__F1-60-MAGs149;s__	GCA_013695855.1	80.4304	0.02	Absence
SLM_MC1B_46-M07	4~6 cm	SAMN40274147	JBCJWD000000000	13400459	12775407	12770967	12770959	366658	968891	67.7239	70	64429	21930	0.627139	39.6552	0	1028	0.917964	d__Bacteria;p__Actinobacteriota;c__Thermoleophilia;o__Gaiellales;f__F1-60-MAGs149;g__F1-60-MAGs149;s__	2.44329e+06	d__Bacteria;p__Actinobacteriota;c__Thermoleophilia;o__Gaiellales;f__F1-60-MAGs149;g__F1-60-MAGs149;s__	GCF_009905735.1	84.2644	0.01	Presence
SLM_MC1B_24-I21	2~4 cm	SAMN40274148	JBCJWE000000000	10309739	9680336	9676637	9676484	387624	1115281	60.6836	72	75782	27203	0.623906	38.7931	0	1200	0.920919	d__Bacteria;p__Actinobacteriota;c__Thermoleophilia;o__Gaiellales;f__F1-60-MAGs149;g__F1-60-MAGs149;s__	2.87495e+06	d__Bacteria;p__Actinobacteriota;c__Thermoleophilia;o__Gaiellales;f__F1-60-MAGs149;g__F1-60-MAGs149;s__	GCA_003245635.1	80.0853	0	Absence
SLM_MC1B_46-P06	4~6 cm	SAMN40274149	JBCJWF000000000	8588814	8073970	8068455	8068446	467250	1276100	64.4943	66	74047	32145	0.628478	55.4859	0	1364	0.921597	d__Bacteria;p__Actinobacteriota;c__Thermoleophilia;o__Gaiellales;f__F1-60-MAGs149;g__F1-60-MAGs149;s__	2.29986e+06	d__Bacteria;p__Actinobacteriota;c__Thermoleophilia;o__Gaiellales;f__F1-60-MAGs149;g__F1-60-MAGs149;s__	GCA_018883025.1	81.1223	0.01	Absence
SLM_LV1_BS-I23	BulkSediment	SAMN40274150	JBCJWG000000000	9933509	9423122	9416686	9416670	284221	826272	58.6652	94	48534	13335	0.629341	28.8075	0	943	0.920798	d__Bacteria;p__Actinobacteriota;c__Thermoleophilia;o__Gaiellales;f__F1-60-MAGs149;g__F1-60-MAGs149;s__	2.86826e+06	d__Bacteria;p__Actinobacteriota;c__Thermoleophilia;o__Gaiellales;f__F1-60-MAGs149;g__F1-60-MAGs149;s__	GCF_000550805.1	83.4319	0.01	Absence
SLM_LV1_BS-J20	BulkSediment	SAMN40274151	JBCJWH000000000	11348948	10745330	10735819	10735812	399434	1282750	55.282	69	109435	32806	0.626684	57.0402	0	1378	0.926526	d__Bacteria;p__Actinobacteriota;c__Thermoleophilia;o__Gaiellales;f__F1-60-MAGs149;g__F1-60-MAGs149;s__	2.24885e+06	d__Bacteria;p__Actinobacteriota;c__Thermoleophilia;o__Gaiellales;f__F1-60-MAGs149;g__F1-60-MAGs149;s__	GCA_019116525.1	81.1478	0.01	Absence
SLM_LV1_BS-D05	BulkSediment	SAMN40274152	JBCJWI000000000	7026166	6647402	6644971	6644964	226509	642213	62.0651	56	68642	19539	0.623644	21.5517	0	709	0.916272	d__Bacteria;p__Actinobacteriota;c__Thermoleophilia;o__Gaiellales;f__F1-60-MAGs149;g__F1-60-MAGs149;s__	2.97987e+06	d__Bacteria;p__Actinobacteriota;c__Thermoleophilia;o__Gaiellales;f__F1-60-MAGs149;g__F1-60-MAGs149;s__	GCA_016462095.1	78.9968	0.36	Absence
SLM_MC1B_24-O11	2~4 cm	SAMN40274153	JBCJWJ000000000	8682664	8181288	8175630	8175539	559013	1521009	64.907	77	72352	38174	0.627812	62.931	0	1620	0.919525	d__Bacteria;p__Actinobacteriota;c__Thermoleophilia;o__Gaiellales;f__F1-60-MAGs149;g__F1-60-MAGs149;s__	2.41695e+06	d__Bacteria;p__Actinobacteriota;c__Thermoleophilia;o__Gaiellales;f__F1-60-MAGs149;g__F1-60-MAGs149;s__	GCA_011042305.1	85.4545	0.01	Presence
SLM_LV1_BS-F16	BulkSediment	SAMN40274154	JBCJWK000000000	7670775	7118482	7097748	7097636	229511	662748	58.7878	60	77138	14754	0.620025	31.4655	0	704	0.917851	d__Bacteria;p__Actinobacteriota;c__Thermoleophilia;o__Gaiellales;f__F1-60-MAGs149;g__F1-60-MAGs149;s__	2.10627e+06	d__Bacteria;p__Actinobacteriota;c__Thermoleophilia;o__Gaiellales;f__F1-60-MAGs149;g__F1-60-MAGs149;s__	GCA_016875695.1	82.1368	0.01	Absence
SLM_MC1B_24-F09	2~4 cm	SAMN40274155	JBCJWL000000000	7319548	7027537	7021333	7021320	537307	1464652	65.942	71	116059	45015	0.628147	64.7989	0.287356	1586	0.920717	d__Bacteria;p__Actinobacteriota;c__Thermoleophilia;o__Gaiellales;f__F1-60-MAGs149;g__F1-60-MAGs149;s__	2.26031e+06	d__Bacteria;p__Actinobacteriota;c__Thermoleophilia;o__Gaiellales;f__F1-60-MAGs149;g__F1-60-MAGs149;s__	GCF_003946405.1	84.2896	0	Presence
SLM_LV1_BS-B05	BulkSediment	SAMN40274156	JBCJWM000000000	8547023	8131749	8127703	8127700	583097	1483196	70.7638	76	63442	30206	0.625369	61.2069	0	1583	0.917714	d__Bacteria;p__Actinobacteriota;c__Thermoleophilia;o__Gaiellales;f__F1-60-MAGs149;g__F1-60-MAGs149;s__	2.42325e+06	d__Bacteria;p__Actinobacteriota;c__Thermoleophilia;o__Gaiellales;f__F1-60-MAGs149;g__F1-60-MAGs149;s__	GCF_008369295.1	85.9766	0	Presence
SLM_MC1B_68-P14	6~8 cm	SAMN40274157	JBCJWN000000000	7793499	7413200	7408174	7408164	515727	1436211	63.7921	77	102876	46827	0.629723	58.1897	0	1532	0.919459	d__Bacteria;p__Actinobacteriota;c__Thermoleophilia;o__Gaiellales;f__F1-60-MAGs149;g__F1-60-MAGs149;s__	2.46816e+06	d__Bacteria;p__Actinobacteriota;c__Thermoleophilia;o__Gaiellales;f__F1-60-MAGs149;g__F1-60-MAGs149;s__	GCA_018970205.1	85.9766	0	Presence
SLM_MC1B_24-B23	2~4 cm	SAMN40274158	JBCJWO000000000	7504645	7078700	7071328	7071090	326215	1051719	53.9662	72	93246	26111	0.62671	62.069	0	1148	0.916607	d__Bacteria;p__Actinobacteriota;c__Thermoleophilia;o__Gaiellales;f__F1-60-MAGs149;g__F1-60-MAGs149;s__	1.69444e+06	d__Bacteria;p__Actinobacteriota;c__Thermoleophilia;o__Gaiellales;f__F1-60-MAGs149;g__F1-60-MAGs149;s__	GCA_001770575.1	86.2673	0.03	Presence
SLM_MC1B_24-G23	2~4 cm	SAMN40274159	JBCJWP000000000	7837674	7313838	7309371	7309223	401501	991396	70.9363	52	69896	39901	0.628318	33.477	0	1028	0.913895	d__Bacteria;p__Actinobacteriota;c__Thermoleophilia;o__Gaiellales;f__F1-60-MAGs149;g__F1-60-MAGs149;s__	2.96142e+06	d__Bacteria;p__Actinobacteriota;c__Thermoleophilia;o__Gaiellales;f__F1-60-MAGs149;g__F1-60-MAGs149;s__	GCA_009841435.1	80.2687	0	Absence
SLM_MC1B_68-P08	6~8 cm	SAMN40274160	JBCJWQ000000000	8833066	8358244	8353376	8353339	629546	1521296	73.892	65	148131	44387	0.628031	63.8506	0	1606	0.920962	d__Bacteria;p__Actinobacteriota;c__Thermoleophilia;o__Gaiellales;f__F1-60-MAGs149;g__F1-60-MAGs149;s__	2.38259e+06	d__Bacteria;p__Actinobacteriota;c__Thermoleophilia;o__Gaiellales;f__F1-60-MAGs149;g__F1-60-MAGs149;s__	GCF_001005215.1	83.5559	0.01	Presence
SLM_LV1_BS-F14	BulkSediment	SAMN40274161	JBCJWR000000000	11393046	10798016	10791966	10791959	139265	357829	66.3329	32	43443	15835	0.622169	18.9655	0	396	0.914448	d__Bacteria;p__Actinobacteriota;c__Thermoleophilia;o__Gaiellales;f__F1-60-MAGs149;g__F1-60-MAGs149;s__	1.88673e+06	d__Bacteria;p__Actinobacteriota;c__Thermoleophilia;o__Gaiellales;f__F1-60-MAGs149;g__F1-60-MAGs149;s__	GCA_903960645.1	78.4521	0.28	Absence
SLM_MC1B_68-I14	6~8 cm	SAMN40274162	JBCJWS000000000	8219541	7756682	7754578	7754519	187929	567750	57.6347	51	47799	18584	0.61678	18.9655	0	638	0.902214	d__Bacteria;p__Actinobacteriota;c__Thermoleophilia;o__Gaiellales;f__F1-60-MAGs149;g__F1-60-MAGs149;s__	2.99359e+06	d__Bacteria;p__Actinobacteriota;c__Thermoleophilia;o__Gaiellales;f__F1-60-MAGs149;g__F1-60-MAGs149;s__	GCA_003158195.1	79.1182	0.02	Presence
SLM_MC1B_810-A15	8~10 cm	SAMN40274163	JBCJWT000000000	8915517	8417974	8415379	8415347	340324	1002190	59.0552	68	74385	27171	0.622445	45.8333	0	1113	0.912333	d__Bacteria;p__Actinobacteriota;c__Thermoleophilia;o__Gaiellales;f__F1-60-MAGs149;g__F1-60-MAGs149;s__	2.1866e+06	d__Bacteria;p__Actinobacteriota;c__Thermoleophilia;o__Gaiellales;f__F1-60-MAGs149;g__F1-60-MAGs149;s__	GCF_009193355.1	85.5371	0.01	Presence
SLM_LV1_BS-B16	BulkSediment	SAMN40274164	JBCJWU000000000	8661695	8103180	8095101	8095088	422177	1375571	53.646	77	104262	33963	0.626981	58.046	0.431034	1452	0.919954	d__Bacteria;p__Actinobacteriota;c__Thermoleophilia;o__Gaiellales;f__F1-60-MAGs149;g__F1-60-MAGs149;s__	2.3698e+06	d__Bacteria;p__Actinobacteriota;c__Thermoleophilia;o__Gaiellales;f__F1-60-MAGs149;g__F1-60-MAGs149;s__	GCF_003789045.1	82.7946	0	Presence
SLM_MC1B_24-F11	2~4 cm	SAMN40274165	JBCJWV000000000	6990562	6699897	6698690	6698676	174640	446619	69.4475	29	47852	24841	0.61681	14.7989	0	482	0.912523	d__Bacteria;p__Actinobacteriota;c__Thermoleophilia;o__Gaiellales;f__F1-60-MAGs149;g__F1-60-MAGs149;s__	3.01793e+06	d__Bacteria;p__Actinobacteriota;c__Thermoleophilia;o__Gaiellales;f__F1-60-MAGs149;g__F1-60-MAGs149;s__	GCF_016907295.1	83.579	0.02	Presence
SLM_MC1B_68-P15	6~8 cm	SAMN40274166	JBCJWW000000000	9106182	8507691	8503178	8503151	190809	566572	58.3822	43	57141	32869	0.620041	18.9655	0	624	0.912318	d__Bacteria;p__Actinobacteriota;c__Thermoleophilia;o__Gaiellales;f__F1-60-MAGs149;g__F1-60-MAGs149;s__	2.98738e+06	d__Bacteria;p__Actinobacteriota;c__Thermoleophilia;o__Gaiellales;f__F1-60-MAGs149;g__F1-60-MAGs149;s__	GCF_004402215.1	80.3554	0.01	Absence
SLM_LV1_BS-F07	BulkSediment	SAMN40274167	JBCJWX000000000	8341780	8002918	7999372	7999352	309824	822384	67.6419	61	63621	21739	0.627924	35.0862	0.862069	888	0.917981	d__Bacteria;p__Actinobacteriota;c__Thermoleophilia;o__Gaiellales;f__F1-60-MAGs149;g__F1-60-MAGs149;s__	2.3439e+06	d__Bacteria;p__Actinobacteriota;c__Thermoleophilia;o__Gaiellales;f__F1-60-MAGs149;g__F1-60-MAGs149;s__	GCF_001571045.1	85.4428	0	Absence
SLM_MC1B_24-G07	2~4 cm	SAMN40274168	JBCJWY000000000	8475647	8172697	8168284	8168265	430065	1095935	70.4027	69	55493	23807	0.627436	54.2529	0	1185	0.919894	d__Bacteria;p__Actinobacteriota;c__Thermoleophilia;o__Gaiellales;f__F1-60-MAGs149;g__F1-60-MAGs149;s__	2.02005e+06	d__Bacteria;p__Actinobacteriota;c__Thermoleophilia;o__Gaiellales;f__F1-60-MAGs149;g__F1-60-MAGs149;s__	GCA_019116525.1	81.1478	0.02	Absence
SLM_LV1_BS-D18	BulkSediment	SAMN40274169	JBCJWZ000000000	8054915	7629120	7622812	7622810	578172	1508582	67.5754	86	110092	32015	0.627027	62.2126	0	1627	0.918309	d__Bacteria;p__Actinobacteriota;c__Thermoleophilia;o__Gaiellales;f__F1-60-MAGs149;g__F1-60-MAGs149;s__	2.42488e+06	d__Bacteria;p__Actinobacteriota;c__Thermoleophilia;o__Gaiellales;f__F1-60-MAGs149;g__F1-60-MAGs149;s__	GCF_002979775.1	80.1372	0.01	Absence
SLM_MC1B_810-A03	8~10 cm	SAMN40274170	JBCJXA000000000	8760125	8339026	8334154	8334136	557058	1436060	68.6098	85	103026	29154	0.626994	65.7328	0.431034	1519	0.920113	d__Bacteria;p__Actinobacteriota;c__Thermoleophilia;o__Gaiellales;f__F1-60-MAGs149;g__F1-60-MAGs149;s__	2.18469e+06	d__Bacteria;p__Actinobacteriota;c__Thermoleophilia;o__Gaiellales;f__F1-60-MAGs149;g__F1-60-MAGs149;s__	GCF_017912535.1	83.682	0	Presence
SLM_MC1B_810-A10	8~10 cm	SAMN40274171	JBCJXB000000000	9420300	8895775	8890219	8890182	506824	1364359	65.7796	77	90223	29113	0.62595	56.0345	0	1436	0.919515	d__Bacteria;p__Actinobacteriota;c__Thermoleophilia;o__Gaiellales;f__F1-60-MAGs149;g__F1-60-MAGs149;s__	2.43486e+06	d__Bacteria;p__Actinobacteriota;c__Thermoleophilia;o__Gaiellales;f__F1-60-MAGs149;g__F1-60-MAGs149;s__	GCF_000738085.1	86.0003	0.01	Presence
SLM_MC1B_68-L23	6~8 cm	SAMN40274172	JBCJXC000000000	8620745	8152545	8140725	8140723	397914	1119856	65.4803	54	69380	35520	0.625237	59.9138	1.2931	1176	0.921203	d__Bacteria;p__Actinobacteriota;c__Thermoleophilia;o__Gaiellales;f__F1-60-MAGs149;g__F1-60-MAGs149;s__	1.86911e+06	d__Bacteria;p__Actinobacteriota;c__Thermoleophilia;o__Gaiellales;f__F1-60-MAGs149;g__F1-60-MAGs149;s__	GCA_016462095.1	79.1132	0.32	Absence
SLM_MC1B_68-D10	6~8 cm	SAMN40274173	JBCJXD000000000	7099579	6815881	6814205	6814203	85076	222139	63.3234	31	22139	11042	0.61692	15.5172	0	242	0.928365	d__Bacteria;p__Actinobacteriota;c__Thermoleophilia;o__Gaiellales;f__F1-60-MAGs149;g__F1-60-MAGs149;s__	1.43156e+06	d__Bacteria;p__Actinobacteriota;c__Thermoleophilia;o__Gaiellales;f__F1-60-MAGs149;g__F1-60-MAGs149;s__				Absence
SLM_LV1_BS-K17	BulkSediment	SAMN40274174	JBCJXE000000000	6972151	6637540	6634175	6634168	621572	1536105	72.2531	72	128228	37298	0.628311	46.5517	0	1635	0.918286	d__Bacteria;p__Actinobacteriota;c__Thermoleophilia;o__Gaiellales;f__F1-60-MAGs149;g__F1-60-MAGs149;s__	3.29978e+06	d__Bacteria;p__Actinobacteriota;c__Thermoleophilia;o__Gaiellales;f__F1-60-MAGs149;g__F1-60-MAGs149;s__	GCA_001486445.1	85.0398	0.01	Presence
SLM_MC1B_68-F02	6~8 cm	SAMN40274175	JBCJXF000000000	8821862	8352211	8344195	8344187	434949	1154914	67.3041	73	107220	25871	0.626022	73.1322	0.431034	1246	0.922505	d__Bacteria;p__Actinobacteriota;c__Thermoleophilia;o__Gaiellales;f__F1-60-MAGs149;g__F1-60-MAGs149;s__	1.57921e+06	d__Bacteria;p__Actinobacteriota;c__Thermoleophilia;o__Gaiellales;f__F1-60-MAGs149;g__F1-60-MAGs149;s__	GCA_001312805.1	80.0083	0.01	Absence
SLM_LV1_BS-I20	BulkSediment	SAMN40274176	JBCJXG000000000	7515790	7069148	7063525	7063518	372691	1025951	63.6055	66	109468	22519	0.626358	39.6552	0	1098	0.923195	d__Bacteria;p__Actinobacteriota;c__Thermoleophilia;o__Gaiellales;f__F1-60-MAGs149;g__F1-60-MAGs149;s__	2.58718e+06	d__Bacteria;p__Actinobacteriota;c__Thermoleophilia;o__Gaiellales;f__F1-60-MAGs149;g__F1-60-MAGs149;s__	GCA_016462095.1	79.1207	0.34	Absence
SLM_LV1_BS-F18	BulkSediment	SAMN40274177	JBCJXH000000000	6782685	6399426	6395145	6395096	302264	901713	58.4537	73	66621	18548	0.623889	47.773	0.431034	948	0.919336	d__Bacteria;p__Actinobacteriota;c__Thermoleophilia;o__Gaiellales;f__F1-60-MAGs149;g__F1-60-MAGs149;s__	1.8875e+06	d__Bacteria;p__Actinobacteriota;c__Thermoleophilia;o__Gaiellales;f__F1-60-MAGs149;g__F1-60-MAGs149;s__	GCF_009834025.1	81.96	0.02	Absence
SLM_LV1_BS-I10	BulkSediment	SAMN40274178	JBCJXI000000000	10258367	9508454	9503125	9503122	230881	642668	61.0742	54	92864	21310	0.619584	38.4852	0	718	0.921585	d__Bacteria;p__Actinobacteriota;c__Thermoleophilia;o__Gaiellales;f__F1-60-MAGs149;g__F1-60-MAGs149;s__	1.66991e+06	d__Bacteria;p__Actinobacteriota;c__Thermoleophilia;o__Gaiellales;f__F1-60-MAGs149;g__F1-60-MAGs149;s__	GCF_002929355.1	81.985	0.01	Absence
SLM_MC1B_46-M20	4~6 cm	SAMN40274179	JBCJXJ000000000	8121396	7700781	7697527	7697521	341207	1062591	57.3046	58	72898	40122	0.622604	44.6264	1.2931	1132	0.911683	d__Bacteria;p__Actinobacteriota;c__Thermoleophilia;o__Gaiellales;f__F1-60-MAGs149;g__F1-60-MAGs149;s__	2.38108e+06	d__Bacteria;p__Actinobacteriota;c__Thermoleophilia;o__Gaiellales;f__F1-60-MAGs149;g__F1-60-MAGs149;s__	GCA_902805975.1	88.8264	0.01	Presence
SLM_LV1_BS-F22	BulkSediment	SAMN40274180	JBCJXK000000000	11805450	11185160	11180658	11180652	337296	859508	66.923	80	55825	16773	0.62209	36.2069	0	949	0.926844	d__Bacteria;p__Actinobacteriota;c__Thermoleophilia;o__Gaiellales;f__F1-60-MAGs149;g__F1-60-MAGs149;s__	2.37388e+06	d__Bacteria;p__Actinobacteriota;c__Thermoleophilia;o__Gaiellales;f__F1-60-MAGs149;g__F1-60-MAGs149;s__	GCA_016462095.1	79.2694	0.25	Absence
SLM_LV1_BS-B17	BulkSediment	SAMN40274181	JBCJXL000000000	8446464	8018340	8008368	8008361	375532	1245660	56.8236	81	113085	27504	0.627254	48.8506	0.862069	1325	0.91908	d__Bacteria;p__Actinobacteriota;c__Thermoleophilia;o__Gaiellales;f__F1-60-MAGs149;g__F1-60-MAGs149;s__	2.54994e+06	d__Bacteria;p__Actinobacteriota;c__Thermoleophilia;o__Gaiellales;f__F1-60-MAGs149;g__F1-60-MAGs149;s__	GCF_014199945.1	83.8736	0	Presence
SLM_MC1B_24-I22	2~4 cm	SAMN40274182	JBCJXM000000000	9823217	9248564	9233427	9233327	247099	593798	72.1113	31	55983	28683	0.619224	31.4655	0	617	0.927314	d__Bacteria;p__Actinobacteriota;c__Thermoleophilia;o__Gaiellales;f__F1-60-MAGs149;g__F1-60-MAGs149;s__	1.88714e+06	d__Bacteria;p__Actinobacteriota;c__Thermoleophilia;o__Gaiellales;f__F1-60-MAGs149;g__F1-60-MAGs149;s__	GCF_002090095.1	80.4399	0.01	Absence
SLM_MC1B_46-D14	4~6 cm	SAMN40274183	JBCJXN000000000	10160822	9605057	9601420	9601418	464515	1409116	59.4278	74	111761	35107	0.624024	66.2356	0	1504	0.915987	d__Bacteria;p__Actinobacteriota;c__Thermoleophilia;o__Gaiellales;f__F1-60-MAGs149;g__F1-60-MAGs149;s__	2.12743e+06	d__Bacteria;p__Actinobacteriota;c__Thermoleophilia;o__Gaiellales;f__F1-60-MAGs149;g__F1-60-MAGs149;s__	GCA_009841605.1	83.5807	0	Presence
SLM_LV1_BS-A17	BulkSediment	SAMN40274184	JBCJXO000000000	10121364	9433842	9428381	9428372	634924	1634964	68.9221	89	112215	37240	0.626065	77.4425	1.2931	1749	0.920363	d__Bacteria;p__Actinobacteriota;c__Thermoleophilia;o__Gaiellales;f__F1-60-MAGs149;g__F1-60-MAGs149;s__	2.1112e+06	d__Bacteria;p__Actinobacteriota;c__Thermoleophilia;o__Gaiellales;f__F1-60-MAGs149;g__F1-60-MAGs149;s__	GCF_014287875.1	84.2142	0.01	Presence
SLM_LV1_BS-E22	BulkSediment	SAMN40274185	JBCJXP000000000	9181762	8667890	8663774	8663746	183707	442135	72.9545	27	55304	30834	0.624533	20.6897	0	480	0.917935	d__Bacteria;p__Actinobacteriota;c__Thermoleophilia;o__Gaiellales;f__F1-60-MAGs149;g__F1-60-MAGs149;s__	2.13699e+06	d__Bacteria;p__Actinobacteriota;c__Thermoleophilia;o__Gaiellales;f__F1-60-MAGs149;g__F1-60-MAGs149;s__	GCA_016462095.1	79.416	0.27	Absence
SLM_MC1B_68-N08	6~8 cm	SAMN40274186	JBCJXQ000000000	6623585	6288853	6283243	6283235	141748	342725	68.8607	52	24791	8952	0.622878	10.3448	0	402	0.922498	d__Bacteria;p__Actinobacteriota;c__Thermoleophilia;o__Gaiellales;f__F1-60-MAGs149;g__F1-60-MAGs149;s__	3.31301e+06	d__Bacteria;p__Actinobacteriota;c__Thermoleophilia;o__Gaiellales;f__F1-60-MAGs149;g__F1-60-MAGs149;s__	GCA_009694475.1	79.6075	0.37	Absence
SLM_LV1_BS-J08	BulkSediment	SAMN40274187	JBCJXR000000000	8153861	7694989	7691710	7691702	791144	1933755	73.9493	64	193098	61625	0.628216	87.1264	1.2931	2016	0.923954	d__Bacteria;p__Actinobacteriota;c__Thermoleophilia;o__Gaiellales;f__F1-60-MAGs149;g__F1-60-MAGs149;s__	2.21948e+06	d__Bacteria;p__Actinobacteriota;c__Thermoleophilia;o__Gaiellales;f__F1-60-MAGs149;g__F1-60-MAGs149;s__	GCF_016025525.2	83.9691	0	Presence
SLM_MC1B_68-A06	6~8 cm	SAMN40274188	JBCJXS000000000	9165211	8671387	8660687	8660686	342252	959946	62.3924	73	133571	18685	0.624827	27.7586	0	1044	0.922511	d__Bacteria;p__Actinobacteriota;c__Thermoleophilia;o__Gaiellales;f__F1-60-MAGs149;g__F1-60-MAGs149;s__	3.45819e+06	d__Bacteria;p__Actinobacteriota;c__Thermoleophilia;o__Gaiellales;f__F1-60-MAGs149;g__F1-60-MAGs149;s__	GCA_003697065.1	79.9828	0	Absence
SLM_LV1_BS-I05	BulkSediment	SAMN40274189	JBCJXT000000000	6755065	6355859	6353578	6353563	257925	703089	64.2297	39	79427	28881	0.625567	22.4138	0	749	0.908996	d__Bacteria;p__Actinobacteriota;c__Thermoleophilia;o__Gaiellales;f__F1-60-MAGs149;g__F1-60-MAGs149;s__	3.13686e+06	d__Bacteria;p__Actinobacteriota;c__Thermoleophilia;o__Gaiellales;f__F1-60-MAGs149;g__F1-60-MAGs149;s__	GCF_009377195.2	88.4472	0.01	Presence
SLM_LV1_BS-F11	BulkSediment	SAMN40274190	JBCJXU000000000	8131936	7761922	7750224	7750217	283748	762182	63.2962	83	53418	13912	0.626751	29.3103	0	833	0.919555	d__Bacteria;p__Actinobacteriota;c__Thermoleophilia;o__Gaiellales;f__F1-60-MAGs149;g__F1-60-MAGs149;s__	2.60039e+06	d__Bacteria;p__Actinobacteriota;c__Thermoleophilia;o__Gaiellales;f__F1-60-MAGs149;g__F1-60-MAGs149;s__	GCF_004346265.1	78.8476	0.01	Absence
SLM_LV1_BS-D19	BulkSediment	SAMN40274191	JBCJXV000000000	10511720	9834297	9824630	9824614	722259	1753796	73.6758	77	108254	47520	0.627034	72.9885	0	1897	0.917563	d__Bacteria;p__Actinobacteriota;c__Thermoleophilia;o__Gaiellales;f__F1-60-MAGs149;g__F1-60-MAGs149;s__	2.40284e+06	d__Bacteria;p__Actinobacteriota;c__Thermoleophilia;o__Gaiellales;f__F1-60-MAGs149;g__F1-60-MAGs149;s__	GCA_001312805.1	84.7601	0	Presence
SLM_MC1B_46-F21	4~6 cm	SAMN40274192	JBCJXW000000000	9686316	9065639	9061054	9061045	448550	1409708	56.5392	66	79308	37216	0.629481	52.8448	0.431034	1481	0.927469	d__Bacteria;p__Actinobacteriota;c__Thermoleophilia;o__Gaiellales;f__F1-60-MAGs149;g__F1-60-MAGs149;s__	2.66764e+06	d__Bacteria;p__Actinobacteriota;c__Thermoleophilia;o__Gaiellales;f__F1-60-MAGs149;g__F1-60-MAGs149;s__	GCA_001312805.1	80.0083	0	Absence
SLM_MC1B_68-M16	6~8 cm	SAMN40274193	JBCJXX000000000	8301034	7890861	7884729	7884712	430814	1192933	65.4103	62	84512	35824	0.627329	42.6724	0	1317	0.917096	d__Bacteria;p__Actinobacteriota;c__Thermoleophilia;o__Gaiellales;f__F1-60-MAGs149;g__F1-60-MAGs149;s__	2.79556e+06	d__Bacteria;p__Actinobacteriota;c__Thermoleophilia;o__Gaiellales;f__F1-60-MAGs149;g__F1-60-MAGs149;s__	GCA_003242525.1	82.2662	0.02	Absence
SLM_LV1_BS-A19	BulkSediment	SAMN40274194	JBCJXY000000000	7589736	7156987	7151733	7151720	352253	1148780	54.5841	67	79646	36134	0.620375	54.1667	0	1215	0.919086	d__Bacteria;p__Actinobacteriota;c__Thermoleophilia;o__Gaiellales;f__F1-60-MAGs149;g__F1-60-MAGs149;s__	2.12082e+06	d__Bacteria;p__Actinobacteriota;c__Thermoleophilia;o__Gaiellales;f__F1-60-MAGs149;g__F1-60-MAGs149;s__	GCF_009911695.1	85.4663	0	Presence
SLM_MC1B_810-D20	8~10 cm	SAMN40274195	JBCJXZ000000000	6743236	6324990	6321298	6321231	313535	1061129	52.2498	77	112484	26989	0.627937	51.8678	0	1146	0.928692	d__Bacteria;p__Actinobacteriota;c__Thermoleophilia;o__Gaiellales;f__F1-60-MAGs149;g__F1-60-MAGs149;s__	2.04583e+06	d__Bacteria;p__Actinobacteriota;c__Thermoleophilia;o__Gaiellales;f__F1-60-MAGs149;g__F1-60-MAGs149;s__	GCA_017882985.1	80.1637	0.01	Absence
SLM_LV1_BS-C08	BulkSediment	SAMN40274196	JBCJYA000000000	8624353	8243002	8236887	8236857	537635	1404961	69.1185	72	105668	33749	0.629056	54.454	0	1494	0.923927	d__Bacteria;p__Actinobacteriota;c__Thermoleophilia;o__Gaiellales;f__F1-60-MAGs149;g__F1-60-MAGs149;s__	2.58009e+06	d__Bacteria;p__Actinobacteriota;c__Thermoleophilia;o__Gaiellales;f__F1-60-MAGs149;g__F1-60-MAGs149;s__	GCF_001855555.1	81.1093	0.01	Presence
SLM_MC1B_24-F13	2~4 cm	SAMN40274197	JBCJYB000000000	8231558	7721080	7716319	7716257	654337	1702096	68.4892	65	139560	65227	0.627426	73.7787	0.431034	1812	0.922934	d__Bacteria;p__Actinobacteriota;c__Thermoleophilia;o__Gaiellales;f__F1-60-MAGs149;g__F1-60-MAGs149;s__	2.30703e+06	d__Bacteria;p__Actinobacteriota;c__Thermoleophilia;o__Gaiellales;f__F1-60-MAGs149;g__F1-60-MAGs149;s__	GCA_001312805.1	84.7601	0	Presence
SLM_MC1B_24-A07	2~4 cm	SAMN40274198	JBCJYC000000000	6651557	6287205	6283796	6283775	271532	822535	59.7617	38	135911	44811	0.625348	48.2759	0	894	0.912466	d__Bacteria;p__Actinobacteriota;c__Thermoleophilia;o__Gaiellales;f__F1-60-MAGs149;g__F1-60-MAGs149;s__	1.70382e+06	d__Bacteria;p__Actinobacteriota;c__Thermoleophilia;o__Gaiellales;f__F1-60-MAGs149;g__F1-60-MAGs149;s__	GCF_002929225.1	84.613	0	Absence
SLM_MC1B_68-C21	6~8 cm	SAMN40274199	JBCJYD000000000	10787746	10162128	10155712	10155706	283203	730919	68.8025	39	103164	38482	0.629895	46.6236	0.431034	778	0.924606	d__Bacteria;p__Actinobacteriota;c__Thermoleophilia;o__Gaiellales;f__F1-60-MAGs149;g__F1-60-MAGs149;s__	1.5677e+06	d__Bacteria;p__Actinobacteriota;c__Thermoleophilia;o__Gaiellales;f__F1-60-MAGs149;g__F1-60-MAGs149;s__	GCA_018824085.1	83.9451	0	Presence
SLM_MC1B_24-F04	2~4 cm	SAMN40274200	JBCJYE000000000	7881890	7497141	7493826	7493757	378918	1170020	57.0228	74	60518	29683	0.625236	52.8592	0.517241	1255	0.915661	d__Bacteria;p__Actinobacteriota;c__Thermoleophilia;o__Gaiellales;f__F1-60-MAGs149;g__F1-60-MAGs149;s__	2.21347e+06	d__Bacteria;p__Actinobacteriota;c__Thermoleophilia;o__Gaiellales;f__F1-60-MAGs149;g__F1-60-MAGs149;s__	GCA_008642235.1	85.0102	0.01	Presence
SLM_LV1_BS-D06	BulkSediment	SAMN40274201	JBCJYF000000000	9217434	8703253	8696238	8696225	464171	1264087	64.5437	84	124280	30099	0.626818	58.2615	0.862069	1338	0.917421	d__Bacteria;p__Actinobacteriota;c__Thermoleophilia;o__Gaiellales;f__F1-60-MAGs149;g__F1-60-MAGs149;s__	2.16968e+06	d__Bacteria;p__Actinobacteriota;c__Thermoleophilia;o__Gaiellales;f__F1-60-MAGs149;g__F1-60-MAGs149;s__	GCF_004762095.1	83.5807	0.01	Presence
SLM_LV1_BS-F15	BulkSediment	SAMN40274202	JBCJYG000000000	9070327	8499688	8493517	8493469	244046	619893	67.5335	43	60894	25828	0.624487	35.9195	0	666	0.923527	d__Bacteria;p__Actinobacteriota;c__Thermoleophilia;o__Gaiellales;f__F1-60-MAGs149;g__F1-60-MAGs149;s__	1.72578e+06	d__Bacteria;p__Actinobacteriota;c__Thermoleophilia;o__Gaiellales;f__F1-60-MAGs149;g__F1-60-MAGs149;s__	GCA_016462095.1	79.3798	0.29	Absence
SLM_MC1B_68-A13	6~8 cm	SAMN40274203	JBCJYH000000000	10070875	9478858	9471565	9471562	490489	1421033	60.5725	83	88046	28659	0.626439	54.5649	0.862069	1502	0.919767	d__Bacteria;p__Actinobacteriota;c__Thermoleophilia;o__Gaiellales;f__F1-60-MAGs149;g__F1-60-MAGs149;s__	2.6043e+06	d__Bacteria;p__Actinobacteriota;c__Thermoleophilia;o__Gaiellales;f__F1-60-MAGs149;g__F1-60-MAGs149;s__	GCA_016719395.1	84.0539	0.01	Presence
SLM_LV1_BS-E21	BulkSediment	SAMN40274204	JBCJYI000000000	7556780	7124708	7116892	7116875	319688	904657	61.3785	75	76173	19434	0.622448	31.6092	0	998	0.90996	d__Bacteria;p__Actinobacteriota;c__Thermoleophilia;o__Gaiellales;f__F1-60-MAGs149;g__F1-60-MAGs149;s__	2.86201e+06	d__Bacteria;p__Actinobacteriota;c__Thermoleophilia;o__Gaiellales;f__F1-60-MAGs149;g__F1-60-MAGs149;s__	GCF_008638365.1	86.2043	0.01	Presence
SLM_MC1B_24-B18	2~4 cm	SAMN40274205	JBCJYJ000000000	9742676	9289156	9284832	9284821	94298	213600	73.5206	27	29330	10987	0.62544	12.2414	0	232	0.906456	d__Bacteria;p__Actinobacteriota;c__Thermoleophilia;o__Gaiellales;f__F1-60-MAGs149;g__F1-60-MAGs149;s__	1.7449e+06	d__Bacteria;p__Actinobacteriota;c__Thermoleophilia;o__Gaiellales;f__F1-60-MAGs149;g__F1-60-MAGs149;s__	GCA_009694475.1	80.8175	0.42	Absence
SLM_MC1B_24-O19	2~4 cm	SAMN40274206	JBCJYK000000000	9042299	8533135	8525230	8525122	826105	2053329	71.444	61	180111	75330	0.628618	90.9483	1.2931	2118	0.925317	d__Bacteria;p__Actinobacteriota;c__Thermoleophilia;o__Gaiellales;f__F1-60-MAGs149;g__F1-60-MAGs149;s__	2.25769e+06	d__Bacteria;p__Actinobacteriota;c__Thermoleophilia;o__Gaiellales;f__F1-60-MAGs149;g__F1-60-MAGs149;s__	GCA_001312805.1	80.0083	0	Absence
SLM_MC1B_24-E11	2~4 cm	SAMN40274207	JBCJYL000000000	8854879	8474292	8469649	8469631	429973	1343610	57.5788	71	80218	33149	0.626471	49.4253	0	1400	0.9204	d__Bacteria;p__Actinobacteriota;c__Thermoleophilia;o__Gaiellales;f__F1-60-MAGs149;g__F1-60-MAGs149;s__	2.71847e+06	d__Bacteria;p__Actinobacteriota;c__Thermoleophilia;o__Gaiellales;f__F1-60-MAGs149;g__F1-60-MAGs149;s__	GCF_007164525.1	86.9544	0	Presence
SLM_MC1B_02-E15	0~2 cm	SAMN40274208	JBCJYM000000000	8694793	8089882	8080591	8080560	490052	1403022	66.5074	70	162911	43153	0.626565	62.6437	3.01724	1516	0.918084	d__Bacteria;p__Actinobacteriota;c__Thermoleophilia;o__Gaiellales;f__F1-60-MAGs149;g__F1-60-MAGs149;s__	2.23969e+06	d__Bacteria;p__Actinobacteriota;c__Thermoleophilia;o__Gaiellales;f__F1-60-MAGs149;g__F1-60-MAGs149;s__	GCF_001570785.1	86.3138	0	Presence
SLM_LV1_BS-C05	BulkSediment	SAMN40274209	JBCJYN000000000	8503316	8036619	8032095	8032062	300922	880170	60.9049	55	67143	33963	0.625753	41.0201	0.431034	933	0.920632	d__Bacteria;p__Actinobacteriota;c__Thermoleophilia;o__Gaiellales;f__F1-60-MAGs149;g__F1-60-MAGs149;s__	2.1457e+06	d__Bacteria;p__Actinobacteriota;c__Thermoleophilia;o__Gaiellales;f__F1-60-MAGs149;g__F1-60-MAGs149;s__	GCA_001312805.1	80.0083	0.01	Absence
SLM_MC1B_24-F06	2~4 cm	SAMN40274210	JBCJYO000000000	9959540	9415827	9410870	9410859	491168	1240004	71.2379	58	153601	45628	0.630942	62.931	1.2931	1316	0.919044	d__Bacteria;p__Actinobacteriota;c__Thermoleophilia;o__Gaiellales;f__F1-60-MAGs149;g__F1-60-MAGs149;s__	1.97042e+06	d__Bacteria;p__Actinobacteriota;c__Thermoleophilia;o__Gaiellales;f__F1-60-MAGs149;g__F1-60-MAGs149;s__	GCF_001469025.1	85.9766	0	Presence
SLM_LV1_BS-C20	BulkSediment	SAMN40274211	JBCJYP000000000	8001213	7515036	7510213	7510193	204763	789313	45.3298	68	84070	18280	0.623238	37.931	0	848	0.917068	d__Bacteria;p__Actinobacteriota;c__Thermoleophilia;o__Gaiellales;f__F1-60-MAGs149;g__F1-60-MAGs149;s__	2.08092e+06	d__Bacteria;p__Actinobacteriota;c__Thermoleophilia;o__Gaiellales;f__F1-60-MAGs149;g__F1-60-MAGs149;s__	GCA_016462095.1	78.6956	0.31	Presence
SLM_MC1B_46-P03	4~6 cm	SAMN40274212	JBCJYQ000000000	8310258	7860908	7857355	7856639	664611	1915006	61.7562	75	192589	52248	0.626584	90.3736	1.2931	2007	0.920273	d__Bacteria;p__Actinobacteriota;c__Thermoleophilia;o__Gaiellales;f__F1-60-MAGs149;g__F1-60-MAGs149;s__	2.11899e+06	d__Bacteria;p__Actinobacteriota;c__Thermoleophilia;o__Gaiellales;f__F1-60-MAGs149;g__F1-60-MAGs149;s__	GCF_009828105.1	86.4078	0	Presence
SLM_MC1B_68-F16	6~8 cm	SAMN40274213	JBCJYR000000000	9002225	8589117	8580594	8580577	161834	488463	57.1753	41	60036	22062	0.619805	23.6351	0	541	0.91081	d__Bacteria;p__Actinobacteriota;c__Thermoleophilia;o__Gaiellales;f__F1-60-MAGs149;g__F1-60-MAGs149;s__	2.06669e+06	d__Bacteria;p__Actinobacteriota;c__Thermoleophilia;o__Gaiellales;f__F1-60-MAGs149;g__F1-60-MAGs149;s__	GCA_016462095.1	79.6087	0.24	Absence
SLM_MC1B_24-J06	2~4 cm	SAMN40274214	JBCJYS000000000	9140001	8740311	8737191	8737188	189303	497468	67.4978	49	42773	15244	0.61737	26.0776	0	561	0.90135	d__Bacteria;p__Actinobacteriota;c__Thermoleophilia;o__Gaiellales;f__F1-60-MAGs149;g__F1-60-MAGs149;s__	1.90765e+06	d__Bacteria;p__Actinobacteriota;c__Thermoleophilia;o__Gaiellales;f__F1-60-MAGs149;g__F1-60-MAGs149;s__	GCF_900119915.1	84.587	0.02	Presence
SLM_MC1B_810-A09	8~10 cm	SAMN40274215	JBCJYT000000000	8044055	7617642	7612822	7612792	481204	1348685	62.4523	77	87545	31107	0.630213	48.7644	0	1435	0.918991	d__Bacteria;p__Actinobacteriota;c__Thermoleophilia;o__Gaiellales;f__F1-60-MAGs149;g__F1-60-MAGs149;s__	2.76572e+06	d__Bacteria;p__Actinobacteriota;c__Thermoleophilia;o__Gaiellales;f__F1-60-MAGs149;g__F1-60-MAGs149;s__	GCF_004795915.1	86.1114	0	Presence
SLM_LV1_BS-J16	BulkSediment	SAMN40274216	JBCJYU000000000	7715890	7241023	7238400	7238393	543074	1520496	62.9839	86	130124	26739	0.627019	77.5862	0	1611	0.918902	d__Bacteria;p__Actinobacteriota;c__Thermoleophilia;o__Gaiellales;f__F1-60-MAGs149;g__F1-60-MAGs149;s__	1.95975e+06	d__Bacteria;p__Actinobacteriota;c__Thermoleophilia;o__Gaiellales;f__F1-60-MAGs149;g__F1-60-MAGs149;s__	GCF_014199945.1	84.493	0	Presence
SLM_MC1B_46-J14	4~6 cm	SAMN40274217	JBCJYV000000000	10883755	10364642	10362681	10362677	211928	649421	57.9826	43	49321	24563	0.621124	20.6897	0	688	0.908566	d__Bacteria;p__Actinobacteriota;c__Thermoleophilia;o__Gaiellales;f__F1-60-MAGs149;g__F1-60-MAGs149;s__	3.13887e+06	d__Bacteria;p__Actinobacteriota;c__Thermoleophilia;o__Gaiellales;f__F1-60-MAGs149;g__F1-60-MAGs149;s__	GCF_003600895.1	87.1938	0.02	Presence
SLM_LV1_BS-M22	BulkSediment	SAMN40274218	JBCJYW000000000	7192856	6745681	6740854	6740819	366643	970370	65.2069	100	44321	14530	0.626877	36.2069	0	1089	0.923065	d__Bacteria;p__Actinobacteriota;c__Thermoleophilia;o__Gaiellales;f__F1-60-MAGs149;g__F1-60-MAGs149;s__	2.68007e+06	d__Bacteria;p__Actinobacteriota;c__Thermoleophilia;o__Gaiellales;f__F1-60-MAGs149;g__F1-60-MAGs149;s__	GCA_903643075.1	79.9322	0	Absence
SLM_LV1_BS-C10	BulkSediment	SAMN40274219	JBCJYX000000000	8217903	7840024	7834826	7834819	485298	1228547	70.2355	79	61916	21861	0.627462	54.2241	0	1316	0.92865	d__Bacteria;p__Actinobacteriota;c__Thermoleophilia;o__Gaiellales;f__F1-60-MAGs149;g__F1-60-MAGs149;s__	2.26568e+06	d__Bacteria;p__Actinobacteriota;c__Thermoleophilia;o__Gaiellales;f__F1-60-MAGs149;g__F1-60-MAGs149;s__	GCF_002847825.1	83.6565	0.01	Absence
SLM_MC1B_68-P19	6~8 cm	SAMN40274220	JBCJYY000000000	9138305	8657036	8653016	8652990	476618	1291931	64.9958	64	146784	38714	0.628101	46.5661	0	1386	0.918773	d__Bacteria;p__Actinobacteriota;c__Thermoleophilia;o__Gaiellales;f__F1-60-MAGs149;g__F1-60-MAGs149;s__	2.7744e+06	d__Bacteria;p__Actinobacteriota;c__Thermoleophilia;o__Gaiellales;f__F1-60-MAGs149;g__F1-60-MAGs149;s__	GCA_016200675.1	80.0853	0.02	Absence
SLM_MC1B_810-C10	8~10 cm	SAMN40274221	JBCJYZ000000000	7889928	7312027	7304037	7303996	625997	1622779	67.5618	96	87026	35648	0.628453	61.0632	0	1707	0.920819	d__Bacteria;p__Actinobacteriota;c__Thermoleophilia;o__Gaiellales;f__F1-60-MAGs149;g__F1-60-MAGs149;s__	2.65754e+06	d__Bacteria;p__Actinobacteriota;c__Thermoleophilia;o__Gaiellales;f__F1-60-MAGs149;g__F1-60-MAGs149;s__	GCA_001312805.1	82.3842	0.01	Presence
SLM_MC1B_46-O16	4~6 cm	SAMN40274222	JBCJZA000000000	9111314	8605443	8600944	8600907	443037	1331146	58.7203	62	78347	44542	0.626502	55.5316	1.2931	1436	0.922951	d__Bacteria;p__Actinobacteriota;c__Thermoleophilia;o__Gaiellales;f__F1-60-MAGs149;g__F1-60-MAGs149;s__	2.3971e+06	d__Bacteria;p__Actinobacteriota;c__Thermoleophilia;o__Gaiellales;f__F1-60-MAGs149;g__F1-60-MAGs149;s__	GCF_004118935.1	86.7405	0	Presence
SLM_LV1_BS-F21	BulkSediment	SAMN40274223	JBCJZB000000000	9025282	8444725	8427409	8427404	170978	419776	69.5253	53	33796	10822	0.621443	9.71787	0	459	0.906095	d__Bacteria;p__Actinobacteriota;c__Thermoleophilia;o__Gaiellales;f__F1-60-MAGs149;g__F1-60-MAGs149;s__	4.31963e+06	d__Bacteria;p__Actinobacteriota;c__Thermoleophilia;o__Gaiellales;f__F1-60-MAGs149;g__F1-60-MAGs149;s__	GCF_013408685.1	80.5027	0.04	Absence
SLM_LV1_BS-B18	BulkSediment	SAMN40274224	JBCJZC000000000	11569500	10934721	10929950	10929947	154940	600985	43.7185	62	57787	18519	0.619691	24.1379	0	665	0.904279	d__Bacteria;p__Actinobacteriota;c__Thermoleophilia;o__Gaiellales;f__F1-60-MAGs149;g__F1-60-MAGs149;s__	2.4898e+06	d__Bacteria;p__Actinobacteriota;c__Thermoleophilia;o__Gaiellales;f__F1-60-MAGs149;g__F1-60-MAGs149;s__	GCF_017583045.1	81.7881	0.01	Presence
SLM_MC1B_68-L06	6~8 cm	SAMN40274225	JBCJZD000000000	9297897	8824276	8818121	8818115	265526	738556	62.7667	62	77393	19954	0.627409	31.8966	0	799	0.919756	d__Bacteria;p__Actinobacteriota;c__Thermoleophilia;o__Gaiellales;f__F1-60-MAGs149;g__F1-60-MAGs149;s__	2.31547e+06	d__Bacteria;p__Actinobacteriota;c__Thermoleophilia;o__Gaiellales;f__F1-60-MAGs149;g__F1-60-MAGs149;s__	GCF_001667375.1	80.3222	0.02	Absence
SLM_MC1B_810-B05	8~10 cm	SAMN40274226	JBCJZE000000000	9781134	9297763	9289943	9289920	197556	630761	53.9022	66	51824	14954	0.62144	31.0345	0.431034	719	0.906117	d__Bacteria;p__Actinobacteriota;c__Thermoleophilia;o__Gaiellales;f__F1-60-MAGs149;g__F1-60-MAGs149;s__	2.03245e+06	d__Bacteria;p__Actinobacteriota;c__Thermoleophilia;o__Gaiellales;f__F1-60-MAGs149;g__F1-60-MAGs149;s__	GCA_009694475.1	79.561	0.3	Absence
SLM_LV1_BS-E11	BulkSediment	SAMN40274227	JBCJZF000000000	8221230	7727854	7719906	7719894	311089	1000100	56.2541	79	49872	21032	0.625002	35.1293	0	1090	0.918039	d__Bacteria;p__Actinobacteriota;c__Thermoleophilia;o__Gaiellales;f__F1-60-MAGs149;g__F1-60-MAGs149;s__	2.84691e+06	d__Bacteria;p__Actinobacteriota;c__Thermoleophilia;o__Gaiellales;f__F1-60-MAGs149;g__F1-60-MAGs149;s__	GCA_013812005.1	80.9966	0.01	Absence
SLM_LV1_0208-O22	0.2~0.8 um	SAMN40274228	JBCJZG000000000	7957448	7432394	7430884	7430854	138245	413522	57.2979	56	26361	8482	0.622516	17.2414	0	455	0.920643	d__Bacteria;p__Actinobacteriota;c__Thermoleophilia;o__Gaiellales;f__F1-60-MAGs149;g__F1-60-MAGs149;s__	2.39843e+06	d__Bacteria;p__Actinobacteriota;c__Thermoleophilia;o__Gaiellales;f__F1-60-MAGs149;g__F1-60-MAGs149;s__	GCF_001921205.1	86.2673	0.01	Presence
SLM_MC1B_46-D13	4~6 cm	SAMN40274229	JBCJZH000000000	7547852	7102015	7092634	7092634	421639	1130249	65.9167	48	84315	41668	0.627676	38.3908	0	1220	0.919137	d__Bacteria;p__Actinobacteriota;c__Thermoleophilia;o__Gaiellales;f__F1-60-MAGs149;g__F1-60-MAGs149;s__	2.94406e+06	d__Bacteria;p__Actinobacteriota;c__Thermoleophilia;o__Gaiellales;f__F1-60-MAGs149;g__F1-60-MAGs149;s__	GCA_011620705.1	82.7697	0.01	Absence
SLM_MC1B_02-A07	0~2 cm	SAMN40274230	JBCJZI000000000	8420365	7953410	7948089	7948082	592865	1484079	70.8609	85	68020	35908	0.629563	63.3046	0.862069	1553	0.926786	d__Bacteria;p__Actinobacteriota;c__Thermoleophilia;o__Gaiellales;f__F1-60-MAGs149;g__F1-60-MAGs149;s__	2.34435e+06	d__Bacteria;p__Actinobacteriota;c__Thermoleophilia;o__Gaiellales;f__F1-60-MAGs149;g__F1-60-MAGs149;s__	GCA_002813635.1	86.3422	0.01	Presence
SLM_LV1_0830-I17	0.8~3.0 um	SAMN40274231	JBCJZJ000000000	7322419	6738157	6733826	6732666	147502	359018	62.1558	72	15767	5861	0.624208	20.0627	0	420	0.925093	d__Bacteria;p__Actinobacteriota;c__Thermoleophilia;o__Gaiellales;f__F1-60-MAGs149;g__F1-60-MAGs149;s__	1.78948e+06	d__Bacteria;p__Actinobacteriota;c__Thermoleophilia;o__Gaiellales;f__F1-60-MAGs149;g__F1-60-MAGs149;s__	GCA_903847495.1	78.5134	0.35	Absence
SLM_MC1B_68-I11	6~8 cm	SAMN40274232	JBCJZK000000000	10257924	9812709	9805342	9805335	298193	803910	65.161	67	39523	15448	0.628608	38.4914	0	879	0.920708	d__Bacteria;p__Actinobacteriota;c__Thermoleophilia;o__Gaiellales;f__F1-60-MAGs149;g__F1-60-MAGs149;s__	2.08855e+06	d__Bacteria;p__Actinobacteriota;c__Thermoleophilia;o__Gaiellales;f__F1-60-MAGs149;g__F1-60-MAGs149;s__	GCA_016462095.1	79.0145	0.37	Absence
SLM_MC1B_68-K08	6~8 cm	SAMN40274233	JBCJZL000000000	8715964	8313737	8308209	8308206	139122	337058	72.9911	24	46509	24468	0.629206	13.7931	0	370	0.918243	d__Bacteria;p__Actinobacteriota;c__Thermoleophilia;o__Gaiellales;f__F1-60-MAGs149;g__F1-60-MAGs149;s__	2.44367e+06	d__Bacteria;p__Actinobacteriota;c__Thermoleophilia;o__Gaiellales;f__F1-60-MAGs149;g__F1-60-MAGs149;s__	GCA_009694475.1	79.2689	0.3	Absence
SLM_MC1B_810-B02	8~10 cm	SAMN40274234	JBCJZM000000000	8106196	7714987	7707977	7707966	279344	720377	67.9711	49	104505	30525	0.625932	24.1379	0	771	0.911138	d__Bacteria;p__Actinobacteriota;c__Thermoleophilia;o__Gaiellales;f__F1-60-MAGs149;g__F1-60-MAGs149;s__	2.98442e+06	d__Bacteria;p__Actinobacteriota;c__Thermoleophilia;o__Gaiellales;f__F1-60-MAGs149;g__F1-60-MAGs149;s__	GCA_005774595.1	87.2525	0	Presence
SLM_LV1_BS-G10	BulkSediment	SAMN40274235	JBCJZN000000000	9361942	8838363	8832449	8832445	482793	1294863	65.2798	105	84311	19117	0.625861	58.5489	0	1432	0.915345	d__Bacteria;p__Actinobacteriota;c__Thermoleophilia;o__Gaiellales;f__F1-60-MAGs149;g__F1-60-MAGs149;s__	2.21159e+06	d__Bacteria;p__Actinobacteriota;c__Thermoleophilia;o__Gaiellales;f__F1-60-MAGs149;g__F1-60-MAGs149;s__	GCF_000710345.2	81.4886	0.01	Absence
SLM_MC1B_810-D16	8~10 cm	SAMN40274236	JBCJZO000000000	9104030	8456705	8447273	8447167	557235	1386017	69.3746	90	102543	30742	0.628108	61.5517	0	1452	0.919083	d__Bacteria;p__Actinobacteriota;c__Thermoleophilia;o__Gaiellales;f__F1-60-MAGs149;g__F1-60-MAGs149;s__	2.25179e+06	d__Bacteria;p__Actinobacteriota;c__Thermoleophilia;o__Gaiellales;f__F1-60-MAGs149;g__F1-60-MAGs149;s__	GCA_001312805.1	84.7601	0	Presence
SLM_LV1_BS-G18	BulkSediment	SAMN40274237	JBCJZP000000000	9644748	9141197	9139568	9139564	259026	791784	57.6532	71	50576	16557	0.621072	36.2069	0	880	0.913287	d__Bacteria;p__Actinobacteriota;c__Thermoleophilia;o__Gaiellales;f__F1-60-MAGs149;g__F1-60-MAGs149;s__	2.18683e+06	d__Bacteria;p__Actinobacteriota;c__Thermoleophilia;o__Gaiellales;f__F1-60-MAGs149;g__F1-60-MAGs149;s__	GCF_000341145.1	87.2922	0	Presence
SLM_MC1B_810-A11	8~10 cm	SAMN40274238	JBCJZQ000000000	8202713	7826329	7821252	7821250	713701	1779813	71.9921	101	93546	32833	0.627772	63.2184	1.2931	1887	0.913253	d__Bacteria;p__Actinobacteriota;c__Thermoleophilia;o__Gaiellales;f__F1-60-MAGs149;g__F1-60-MAGs149;s__	2.81534e+06	d__Bacteria;p__Actinobacteriota;c__Thermoleophilia;o__Gaiellales;f__F1-60-MAGs149;g__F1-60-MAGs149;s__	GCA_016705685.1	84.3289	0	Presence
SLM_MC1B_810-C09	8~10 cm	SAMN40274239	JBCJZR000000000	8206507	7619135	7614479	7614379	405335	1195828	57.7348	109	41478	17513	0.624884	40.0862	0.862069	1313	0.914948	d__Bacteria;p__Actinobacteriota;c__Thermoleophilia;o__Gaiellales;f__F1-60-MAGs149;g__F1-60-MAGs149;s__	2.98314e+06	d__Bacteria;p__Actinobacteriota;c__Thermoleophilia;o__Gaiellales;f__F1-60-MAGs149;g__F1-60-MAGs149;s__	GCA_001486445.1	82.5265	0	Absence
SLM_MC1B_24-L08	2~4 cm	SAMN40274240	JBCJZS000000000	8927346	8379516	8374740	8374681	442071	1207154	63.1938	93	67157	22543	0.626309	52.5862	0	1321	0.916466	d__Bacteria;p__Actinobacteriota;c__Thermoleophilia;o__Gaiellales;f__F1-60-MAGs149;g__F1-60-MAGs149;s__	2.29557e+06	d__Bacteria;p__Actinobacteriota;c__Thermoleophilia;o__Gaiellales;f__F1-60-MAGs149;g__F1-60-MAGs149;s__	GCF_016892625.1	84.4693	0	Presence
SLM_MC1B_24-F03	2~4 cm	SAMN40274241	JBCJZT000000000	9057995	8674076	8669511	8669478	566990	1439368	70.7552	71	151427	34662	0.625724	51.7241	0	1532	0.917014	d__Bacteria;p__Actinobacteriota;c__Thermoleophilia;o__Gaiellales;f__F1-60-MAGs149;g__F1-60-MAGs149;s__	2.78278e+06	d__Bacteria;p__Actinobacteriota;c__Thermoleophilia;o__Gaiellales;f__F1-60-MAGs149;g__F1-60-MAGs149;s__	GCA_002897675.1	84.0909	0	Presence
SLM_MC1B_24-B21	2~4 cm	SAMN40274242	JBCJZU000000000	8820271	8399861	8394836	8394734	478335	1372901	61.3777	92	115822	22233	0.628078	53.4483	0	1466	0.914761	d__Bacteria;p__Actinobacteriota;c__Thermoleophilia;o__Gaiellales;f__F1-60-MAGs149;g__F1-60-MAGs149;s__	2.56865e+06	d__Bacteria;p__Actinobacteriota;c__Thermoleophilia;o__Gaiellales;f__F1-60-MAGs149;g__F1-60-MAGs149;s__	GCA_016462095.1	79.2539	0.35	Absence
SLM_MC1B_68-E15	6~8 cm	SAMN40274243	JBCJZV000000000	12038371	11389571	11381913	11381906	275273	924909	52.8353	69	61786	25138	0.6262	34.5115	0	1029	0.914038	d__Bacteria;p__Actinobacteriota;c__Thermoleophilia;o__Gaiellales;f__F1-60-MAGs149;g__F1-60-MAGs149;s__	2.68e+06	d__Bacteria;p__Actinobacteriota;c__Thermoleophilia;o__Gaiellales;f__F1-60-MAGs149;g__F1-60-MAGs149;s__	GCF_014621775.1	80.4577	0.01	Absence
SLM_MC1B_02-I10	0~2 cm	SAMN40274244	JBCJZW000000000	11128705	10537375	10529015	10529008	492288	1236828	68.1931	81	76296	26370	0.626957	22.7273	0	1320	0.914607	d__Bacteria;p__Actinobacteriota;c__Thermoleophilia;o__Gaiellales;f__F1-60-MAGs149;g__F1-60-MAGs149;s__	5.44204e+06	d__Bacteria;p__Actinobacteriota;c__Thermoleophilia;o__Gaiellales;f__F1-60-MAGs149;g__F1-60-MAGs149;s__	GCF_016342265.1	87.3824	0.01	Presence
SLM_LV1_BS-G03	BulkSediment	SAMN40274245	JBCJZX000000000	7832268	7368779	7361868	7361774	512711	1305931	68.373	108	56784	17522	0.627023	49.1379	1.72414	1376	0.922082	d__Bacteria;p__Actinobacteriota;c__Thermoleophilia;o__Gaiellales;f__F1-60-MAGs149;g__F1-60-MAGs149;s__	2.65768e+06	d__Bacteria;p__Actinobacteriota;c__Thermoleophilia;o__Gaiellales;f__F1-60-MAGs149;g__F1-60-MAGs149;s__	GCA_003170315.1	78.9008	0.01	Absence
SLM_LV1_BS-B23	BulkSediment	SAMN40274246	JBCJZY000000000	8225324	7634107	7627020	7626982	306105	733945	71.5503	52	94426	24740	0.622361	43.6063	0	765	0.9277	d__Bacteria;p__Actinobacteriota;c__Thermoleophilia;o__Gaiellales;f__F1-60-MAGs149;g__F1-60-MAGs149;s__	1.68312e+06	d__Bacteria;p__Actinobacteriota;c__Thermoleophilia;o__Gaiellales;f__F1-60-MAGs149;g__F1-60-MAGs149;s__	GCA_004366215.1	82.4324	0.02	Presence
SLM_MC1B_68-F23	6~8 cm	SAMN40274247	JBCJZZ000000000	8303307	7827994	7825866	7825822	345116	885837	69.7159	52	114068	23733	0.62183	44.8276	0	938	0.921934	d__Bacteria;p__Actinobacteriota;c__Thermoleophilia;o__Gaiellales;f__F1-60-MAGs149;g__F1-60-MAGs149;s__	1.9761e+06	d__Bacteria;p__Actinobacteriota;c__Thermoleophilia;o__Gaiellales;f__F1-60-MAGs149;g__F1-60-MAGs149;s__	GCA_009781575.1	79.0999	0.01	Absence
SLM_LV1_BS-K06	BulkSediment	SAMN40274248	JBCKAA000000000	7442694	7069830	7066202	7066200	463250	1161356	70.9062	88	68611	18668	0.629493	44.1092	0.431034	1232	0.927989	d__Bacteria;p__Actinobacteriota;c__Thermoleophilia;o__Gaiellales;f__F1-60-MAGs149;g__F1-60-MAGs149;s__	2.63291e+06	d__Bacteria;p__Actinobacteriota;c__Thermoleophilia;o__Gaiellales;f__F1-60-MAGs149;g__F1-60-MAGs149;s__	GCA_001312805.1	80.2954	0	Absence
SLM_MC1B_02-F02	0~2 cm	SAMN40274249	JBCKAB000000000	8179902	7617189	7614048	7614029	516738	1453536	62.6496	85	87168	27588	0.625074	62.0977	0	1533	0.918764	d__Bacteria;p__Actinobacteriota;c__Thermoleophilia;o__Gaiellales;f__F1-60-MAGs149;g__F1-60-MAGs149;s__	2.34072e+06	d__Bacteria;p__Actinobacteriota;c__Thermoleophilia;o__Gaiellales;f__F1-60-MAGs149;g__F1-60-MAGs149;s__	GCF_000975115.1	87.0265	0.01	Presence
SLM_MC1B_24-A18	2~4 cm	SAMN40274250	JBCKAC000000000	8007976	7562090	7549989	7549944	527368	1356567	67.8024	108	59857	20013	0.625521	61.4943	0.431034	1438	0.917672	d__Bacteria;p__Actinobacteriota;c__Thermoleophilia;o__Gaiellales;f__F1-60-MAGs149;g__F1-60-MAGs149;s__	2.20601e+06	d__Bacteria;p__Actinobacteriota;c__Thermoleophilia;o__Gaiellales;f__F1-60-MAGs149;g__F1-60-MAGs149;s__	GCF_013407595.1	83.9017	0.01	Presence
SLM_MC1B_24-P06	2~4 cm	SAMN40274251	JBCKAD000000000	8186870	7714801	7711495	7711416	601944	1652720	63.8804	124	54687	18859	0.627313	66.8822	0.862069	1755	0.921722	d__Bacteria;p__Actinobacteriota;c__Thermoleophilia;o__Gaiellales;f__F1-60-MAGs149;g__F1-60-MAGs149;s__	2.47109e+06	d__Bacteria;p__Actinobacteriota;c__Thermoleophilia;o__Gaiellales;f__F1-60-MAGs149;g__F1-60-MAGs149;s__	GCF_003614925.1	87.571	0.01	Presence
SLM_MC1B_24-C02	2~4 cm	SAMN40274252	JBCKAE000000000	9957881	9439479	9434339	9434329	622125	1545849	71.8819	103	77074	22284	0.628195	72.8448	0	1614	0.923344	d__Bacteria;p__Actinobacteriota;c__Thermoleophilia;o__Gaiellales;f__F1-60-MAGs149;g__F1-60-MAGs149;s__	2.12211e+06	d__Bacteria;p__Actinobacteriota;c__Thermoleophilia;o__Gaiellales;f__F1-60-MAGs149;g__F1-60-MAGs149;s__	GCA_017859785.1	86.3138	0.01	Presence
SLM_MC1B_02-N19	0~2 cm	SAMN40274253	JBCKAF000000000	10272379	9729642	9723015	9722956	646747	1657507	68.0542	120	52384	22879	0.630251	61.9971	0	1769	0.921143	d__Bacteria;p__Actinobacteriota;c__Thermoleophilia;o__Gaiellales;f__F1-60-MAGs149;g__F1-60-MAGs149;s__	2.67352e+06	d__Bacteria;p__Actinobacteriota;c__Thermoleophilia;o__Gaiellales;f__F1-60-MAGs149;g__F1-60-MAGs149;s__	GCA_013812005.1	80.9966	0.01	Absence
SLM_MC1B_02-M03	0~2 cm	SAMN40274254	JBCKAG000000000	8599616	8164897	8160745	8160692	548345	1383666	69.2494	113	55562	20397	0.629075	46.5517	1.72414	1442	0.924824	d__Bacteria;p__Actinobacteriota;c__Thermoleophilia;o__Gaiellales;f__F1-60-MAGs149;g__F1-60-MAGs149;s__	2.97232e+06	d__Bacteria;p__Actinobacteriota;c__Thermoleophilia;o__Gaiellales;f__F1-60-MAGs149;g__F1-60-MAGs149;s__	GCA_016462095.1	78.9648	0.35	Absence
SLM_MC1B_24-B03	2~4 cm	SAMN40274255	JBCKAH000000000	8650344	8199981	8196315	8196252	524621	1419674	65.8225	121	65355	17429	0.626314	58.3333	0	1513	0.922048	d__Bacteria;p__Actinobacteriota;c__Thermoleophilia;o__Gaiellales;f__F1-60-MAGs149;g__F1-60-MAGs149;s__	2.43373e+06	d__Bacteria;p__Actinobacteriota;c__Thermoleophilia;o__Gaiellales;f__F1-60-MAGs149;g__F1-60-MAGs149;s__	GCF_011039135.1	85.0132	0	Presence
SLM_MC1B_02-A23	0~2 cm	SAMN40274256	JBCKAI000000000	8930908	8285328	8277577	8277503	564976	1634038	60.8881	121	82854	19895	0.626617	69.9713	0	1729	0.922744	d__Bacteria;p__Actinobacteriota;c__Thermoleophilia;o__Gaiellales;f__F1-60-MAGs149;g__F1-60-MAGs149;s__	2.3353e+06	d__Bacteria;p__Actinobacteriota;c__Thermoleophilia;o__Gaiellales;f__F1-60-MAGs149;g__F1-60-MAGs149;s__	GCF_001570865.1	88.5107	0.01	Presence
SLM_MC1B_24-D20	2~4 cm	SAMN40274257	JBCKAJ000000000	7271803	6767795	6764802	6764700	473183	1225241	66.868	94	80531	19046	0.625247	57.4713	0.431034	1297	0.919628	d__Bacteria;p__Actinobacteriota;c__Thermoleophilia;o__Gaiellales;f__F1-60-MAGs149;g__F1-60-MAGs149;s__	2.13192e+06	d__Bacteria;p__Actinobacteriota;c__Thermoleophilia;o__Gaiellales;f__F1-60-MAGs149;g__F1-60-MAGs149;s__	GCF_003602275.1	81.1992	0.01	Absence
SLM_LV1_BS-E15	BulkSediment	SAMN40274258	JBCKAK000000000	9264119	8727971	8721003	8720977	506605	1247674	70.7945	126	46062	15310	0.624221	48.1322	0	1341	0.917225	d__Bacteria;p__Actinobacteriota;c__Thermoleophilia;o__Gaiellales;f__F1-60-MAGs149;g__F1-60-MAGs149;s__	2.59218e+06	d__Bacteria;p__Actinobacteriota;c__Thermoleophilia;o__Gaiellales;f__F1-60-MAGs149;g__F1-60-MAGs149;s__	GCF_013410745.1	86.7172	0.01	Presence
SLM_MC1B_02-I17	0~2 cm	SAMN40274259	JBCKAL000000000	9743408	9204478	9201072	9201066	330319	903085	63.8935	77	41873	18075	0.62225	29.3103	1.72414	961	0.90872	d__Bacteria;p__Actinobacteriota;c__Thermoleophilia;o__Gaiellales;f__F1-60-MAGs149;g__F1-60-MAGs149;s__	3.08111e+06	d__Bacteria;p__Actinobacteriota;c__Thermoleophilia;o__Gaiellales;f__F1-60-MAGs149;g__F1-60-MAGs149;s__	GCF_018885305.1	87.4533	0	Presence
SLM_LV1_BS-G17	BulkSediment	SAMN40274260	JBCKAM000000000	7728765	7167074	7161312	7161274	224094	556041	69.6553	61	36844	14447	0.630711	49.1379	0	590	0.93148	d__Bacteria;p__Actinobacteriota;c__Thermoleophilia;o__Gaiellales;f__F1-60-MAGs149;g__F1-60-MAGs149;s__	1.13159e+06	d__Bacteria;p__Actinobacteriota;c__Thermoleophilia;o__Gaiellales;f__F1-60-MAGs149;g__F1-60-MAGs149;s__	GCF_001652465.1	80.4671	0.02	Absence
SLM_MC1B_24-A17	2~4 cm	SAMN40274261	JBCKAN000000000	7085328	6744758	6738236	6738226	461122	1221665	67.5843	95	67301	23346	0.627075	46.5517	0	1285	0.914287	d__Bacteria;p__Actinobacteriota;c__Thermoleophilia;o__Gaiellales;f__F1-60-MAGs149;g__F1-60-MAGs149;s__	2.62432e+06	d__Bacteria;p__Actinobacteriota;c__Thermoleophilia;o__Gaiellales;f__F1-60-MAGs149;g__F1-60-MAGs149;s__	GCF_016907795.1	85.2635	0.01	Presence
SLM_MC1B_46-M16	4~6 cm	SAMN40274262	JBCKAO000000000	14816324	14220810	14208233	14208231	347458	1032746	60.1612	78	67197	22203	0.626133	20.6897	0	1098	0.917172	d__Bacteria;p__Actinobacteriota;c__Thermoleophilia;o__Gaiellales;f__F1-60-MAGs149;g__F1-60-MAGs149;s__	4.99161e+06	d__Bacteria;p__Actinobacteriota;c__Thermoleophilia;o__Gaiellales;f__F1-60-MAGs149;g__F1-60-MAGs149;s__	GCA_903960645.1	79.0956	0.25	Absence
SLM_MC1B_24-C17	2~4 cm	SAMN40274263	JBCKAP000000000	6921214	6639155	6636230	6636189	680756	1929095	63.1125	129	70643	22888	0.626324	76.8966	0.431034	2039	0.914543	d__Bacteria;p__Actinobacteriota;c__Thermoleophilia;o__Gaiellales;f__F1-60-MAGs149;g__F1-60-MAGs149;s__	2.50869e+06	d__Bacteria;p__Actinobacteriota;c__Thermoleophilia;o__Gaiellales;f__F1-60-MAGs149;g__F1-60-MAGs149;s__	GCF_003946485.1	84.5408	0	Presence
SLM_MC1B_24-N19	2~4 cm	SAMN40274264	JBCKAQ000000000	9040845	8550386	8545090	8545031	615485	1775912	61.6108	114	120163	27181	0.628634	77.5862	0	1846	0.926182	d__Bacteria;p__Actinobacteriota;c__Thermoleophilia;o__Gaiellales;f__F1-60-MAGs149;g__F1-60-MAGs149;s__	2.28895e+06	d__Bacteria;p__Actinobacteriota;c__Thermoleophilia;o__Gaiellales;f__F1-60-MAGs149;g__F1-60-MAGs149;s__	GCF_014530035.1	86.5032	0.01	Presence
SLM_MC1B_46-L18	4~6 cm	SAMN40274265	JBCKAR000000000	9102094	8696977	8692393	8692379	464270	1205497	68.3753	112	46908	15543	0.627238	43.1034	0	1277	0.915644	d__Bacteria;p__Actinobacteriota;c__Thermoleophilia;o__Gaiellales;f__F1-60-MAGs149;g__F1-60-MAGs149;s__	2.79675e+06	d__Bacteria;p__Actinobacteriota;c__Thermoleophilia;o__Gaiellales;f__F1-60-MAGs149;g__F1-60-MAGs149;s__	GCF_002356535.2	85.5905	0.01	Presence
SLM_MC1B_46-C05	4~6 cm	SAMN40274266	JBCKAS000000000	10326259	9746542	9742576	9742568	418113	1259120	58.6551	108	40773	17599	0.625466	48.6351	0.431034	1359	0.917311	d__Bacteria;p__Actinobacteriota;c__Thermoleophilia;o__Gaiellales;f__F1-60-MAGs149;g__F1-60-MAGs149;s__	2.58891e+06	d__Bacteria;p__Actinobacteriota;c__Thermoleophilia;o__Gaiellales;f__F1-60-MAGs149;g__F1-60-MAGs149;s__	GCA_016462095.1	79.2022	0.29	Absence
SLM_MC1B_24-E09	2~4 cm	SAMN40274267	JBCKAT000000000	10652218	10175449	10172185	10172158	516173	1413918	67.5168	93	88268	22331	0.625003	50.6466	0.431034	1537	0.91987	d__Bacteria;p__Actinobacteriota;c__Thermoleophilia;o__Gaiellales;f__F1-60-MAGs149;g__F1-60-MAGs149;s__	2.79174e+06	d__Bacteria;p__Actinobacteriota;c__Thermoleophilia;o__Gaiellales;f__F1-60-MAGs149;g__F1-60-MAGs149;s__	GCA_903843125.1	79.9575	0.01	Absence
SLM_LV1_BS-C02	BulkSediment	SAMN40274268	JBCKAU000000000	7816508	7403856	7399935	7399915	506044	1416691	63.5265	116	67491	21766	0.625294	69.4684	0	1497	0.920369	d__Bacteria;p__Actinobacteriota;c__Thermoleophilia;o__Gaiellales;f__F1-60-MAGs149;g__F1-60-MAGs149;s__	2.03933e+06	d__Bacteria;p__Actinobacteriota;c__Thermoleophilia;o__Gaiellales;f__F1-60-MAGs149;g__F1-60-MAGs149;s__	GCF_900637955.1	85.2823	0	Presence
SLM_MC1B_24-E07	2~4 cm	SAMN40274269	JBCKAV000000000	10489984	9980688	9975022	9975015	476619	1280986	65.8372	85	56775	24450	0.630791	45.5049	0	1304	0.924503	d__Bacteria;p__Actinobacteriota;c__Thermoleophilia;o__Gaiellales;f__F1-60-MAGs149;g__F1-60-MAGs149;s__	2.81505e+06	d__Bacteria;p__Actinobacteriota;c__Thermoleophilia;o__Gaiellales;f__F1-60-MAGs149;g__F1-60-MAGs149;s__	GCF_010667655.1	85.4663	0.01	Presence
SLM_MC1B_24-N14	2~4 cm	SAMN40274270	JBCKAW000000000	13189630	12657621	12645865	12645054	417638	1253699	58.5	102	64726	18867	0.627303	54.4253	0	1301	0.920806	d__Bacteria;p__Actinobacteriota;c__Thermoleophilia;o__Gaiellales;f__F1-60-MAGs149;g__F1-60-MAGs149;s__	2.30352e+06	d__Bacteria;p__Actinobacteriota;c__Thermoleophilia;o__Gaiellales;f__F1-60-MAGs149;g__F1-60-MAGs149;s__	GCF_900601905.1	85.7548	0	Presence
SLM_MC1B_46-E20	4~6 cm	SAMN40274271	JBCKAX000000000	7500320	7046577	7043318	7043317	375638	1272751	51.8568	104	51278	18722	0.626481	58.3621	0	1369	0.913901	d__Bacteria;p__Actinobacteriota;c__Thermoleophilia;o__Gaiellales;f__F1-60-MAGs149;g__F1-60-MAGs149;s__	2.18078e+06	d__Bacteria;p__Actinobacteriota;c__Thermoleophilia;o__Gaiellales;f__F1-60-MAGs149;g__F1-60-MAGs149;s__	GCF_001457795.1	86.3606	0.01	Presence
SLM_MC1B_68-J13	6~8 cm	SAMN40274272	JBCKAY000000000	8062049	7659071	7653983	7653978	418831	1201351	61.9569	102	49065	16709	0.623646	50.1437	0.431034	1297	0.917121	d__Bacteria;p__Actinobacteriota;c__Thermoleophilia;o__Gaiellales;f__F1-60-MAGs149;g__F1-60-MAGs149;s__	2.39582e+06	d__Bacteria;p__Actinobacteriota;c__Thermoleophilia;o__Gaiellales;f__F1-60-MAGs149;g__F1-60-MAGs149;s__	GCA_004348925.1	87.0035	0.01	Presence
SLM_MC1B_24-P18	2~4 cm	SAMN40274273	JBCKAZ000000000	8297319	7855183	7850522	7850507	672175	1817890	65.408	128	60373	19265	0.627477	76.0057	0.718391	1917	0.926235	d__Bacteria;p__Actinobacteriota;c__Thermoleophilia;o__Gaiellales;f__F1-60-MAGs149;g__F1-60-MAGs149;s__	2.39178e+06	d__Bacteria;p__Actinobacteriota;c__Thermoleophilia;o__Gaiellales;f__F1-60-MAGs149;g__F1-60-MAGs149;s__	GCF_900116045.1	85.1086	0	Presence
SLM_MC1B_02-E09	0~2 cm	SAMN40274274	JBCKBA000000000	7601386	7192963	7189130	7189061	150834	380359	70.0474	26	67240	19578	0.622693	8.62069	0	413	0.913505	d__Bacteria;p__Actinobacteriota;c__Thermoleophilia;o__Gaiellales;f__F1-60-MAGs149;g__F1-60-MAGs149;s__	4.41216e+06	d__Bacteria;p__Actinobacteriota;c__Thermoleophilia;o__Gaiellales;f__F1-60-MAGs149;g__F1-60-MAGs149;s__	GCA_009694475.1	79.1192	0.37	Absence
SLM_MC1B_24-P20	2~4 cm	SAMN40274275	JBCKBB000000000	10214950	9733606	9727465	9727453	649947	1725666	67.7579	116	69257	26463	0.626965	84.3391	0	1778	0.924965	d__Bacteria;p__Actinobacteriota;c__Thermoleophilia;o__Gaiellales;f__F1-60-MAGs149;g__F1-60-MAGs149;s__	2.0461e+06	d__Bacteria;p__Actinobacteriota;c__Thermoleophilia;o__Gaiellales;f__F1-60-MAGs149;g__F1-60-MAGs149;s__	GCA_001443455.1	86.1352	0	Presence
SLM_MC1B_46-E16	4~6 cm	SAMN40274276	JBCKBC000000000	7562066	7124706	7121306	7121283	352961	1049021	58.3656	105	70729	13632	0.625599	42.4569	0	1113	0.925807	d__Bacteria;p__Actinobacteriota;c__Thermoleophilia;o__Gaiellales;f__F1-60-MAGs149;g__F1-60-MAGs149;s__	2.47079e+06	d__Bacteria;p__Actinobacteriota;c__Thermoleophilia;o__Gaiellales;f__F1-60-MAGs149;g__F1-60-MAGs149;s__	GCA_015488325.1	84.5569	0.02	Presence
SLM_MC1B_24-K06	2~4 cm	SAMN40274277	JBCKBD000000000	10417351	9917533	9912452	9912446	466433	1289042	64.0127	105	46448	18886	0.625658	48.2471	0	1336	0.927001	d__Bacteria;p__Actinobacteriota;c__Thermoleophilia;o__Gaiellales;f__F1-60-MAGs149;g__F1-60-MAGs149;s__	2.67175e+06	d__Bacteria;p__Actinobacteriota;c__Thermoleophilia;o__Gaiellales;f__F1-60-MAGs149;g__F1-60-MAGs149;s__	GCF_014268655.2	85.3911	0.01	Presence
SLM_LV1_BS-J18	BulkSediment	SAMN40274464	JBCKBE000000000	8939435	8450368	8448005	8447993	491127	1422030	60.7981	112	64946	19596	0.626989	54.1379	0	1482	0.932044	d__Bacteria;p__Actinobacteriota;c__Thermoleophilia;o__Gaiellales;f__F1-60-MAGs149;g__F1-60-MAGs149;s__	2.62668e+06	d__Bacteria;p__Actinobacteriota;c__Thermoleophilia;o__Gaiellales;f__F1-60-MAGs149;g__F1-60-MAGs149;s__	GCA_001312805.1	80.0083	0	Absence
SLM_MC1B_24-N04	2~4 cm	SAMN40274465	JBCKBF000000000	7666800	7176670	7172414	7172269	416859	1187710	61.4177	74	143861	25435	0.626346	45.6897	0	1216	0.921961	d__Bacteria;p__Actinobacteriota;c__Thermoleophilia;o__Gaiellales;f__F1-60-MAGs149;g__F1-60-MAGs149;s__	2.59952e+06	d__Bacteria;p__Actinobacteriota;c__Thermoleophilia;o__Gaiellales;f__F1-60-MAGs149;g__F1-60-MAGs149;s__	GCF_001839655.1	80.9223	0.01	Absence
SLM_MC1B_24-N03	2~4 cm	SAMN40274466	JBCKBG000000000	8397868	7874100	7863469	7863381	122798	264809	78.3726	23	45476	16205	0.631648	12.342	0	275	0.928794	d__Bacteria;p__Actinobacteriota;c__Thermoleophilia;o__Gaiellales;f__F1-60-MAGs149;g__F1-60-MAGs149;s__	2.1456e+06	d__Bacteria;p__Actinobacteriota;c__Thermoleophilia;o__Gaiellales;f__F1-60-MAGs149;g__F1-60-MAGs149;s__	GCA_016462095.1	81.3234	0.35	Absence
SLM_LV1_BS-A18	BulkSediment	SAMN40274467	JBCKBH000000000	6859149	6509381	6504527	6504526	161566	414319	65.9063	47	42448	13001	0.629843	24.4828	0.0862069	439	0.935535	d__Bacteria;p__Actinobacteriota;c__Thermoleophilia;o__Gaiellales;f__F1-60-MAGs149;g__F1-60-MAGs149;s__	1.69229e+06	d__Bacteria;p__Actinobacteriota;c__Thermoleophilia;o__Gaiellales;f__F1-60-MAGs149;g__F1-60-MAGs149;s__	GCA_016462095.1	79.2494	0.38	Absence
SLM_MC1B_24-G22	2~4 cm	SAMN40274468	JBCKBI000000000	8264724	7781438	7776917	7776829	573969	1462350	68.2721	104	78948	23379	0.626043	61.5661	0.431034	1474	0.927649	d__Bacteria;p__Actinobacteriota;c__Thermoleophilia;o__Gaiellales;f__F1-60-MAGs149;g__F1-60-MAGs149;s__	2.37525e+06	d__Bacteria;p__Actinobacteriota;c__Thermoleophilia;o__Gaiellales;f__F1-60-MAGs149;g__F1-60-MAGs149;s__	GCA_019218415.1	88.3242	0.01	Presence
SLM_MC1B_24-E06	2~4 cm	SAMN40274469	JBCKBJ000000000	10447745	10052299	10048838	10048805	550136	1443604	68.1337	101	127997	26395	0.626879	55.1724	0.862069	1446	0.921538	d__Bacteria;p__Actinobacteriota;c__Thermoleophilia;o__Gaiellales;f__F1-60-MAGs149;g__F1-60-MAGs149;s__	2.61653e+06	d__Bacteria;p__Actinobacteriota;c__Thermoleophilia;o__Gaiellales;f__F1-60-MAGs149;g__F1-60-MAGs149;s__	GCF_003226895.2	87.7153	0	Presence
SLM_MC1B_46-D05	4~6 cm	SAMN40274470	JBCKBK000000000	8000725	7553174	7550561	7550558	379367	1148209	58.3625	83	81725	25036	0.625222	43.6782	0.862069	1207	0.921618	d__Bacteria;p__Actinobacteriota;c__Thermoleophilia;o__Gaiellales;f__F1-60-MAGs149;g__F1-60-MAGs149;s__	2.62879e+06	d__Bacteria;p__Actinobacteriota;c__Thermoleophilia;o__Gaiellales;f__F1-60-MAGs149;g__F1-60-MAGs149;s__	GCF_000590475.1	79.0906	0	Absence
SLM_LV1_BS-E14	BulkSediment	SAMN40274471	JBCKBL000000000	9002734	8494645	8489625	8489620	489082	1304192	64.9329	128	46144	15888	0.628204	62.7443	2.37069	1405	0.921989	d__Bacteria;p__Actinobacteriota;c__Thermoleophilia;o__Gaiellales;f__F1-60-MAGs149;g__F1-60-MAGs149;s__	2.07858e+06	d__Bacteria;p__Actinobacteriota;c__Thermoleophilia;o__Gaiellales;f__F1-60-MAGs149;g__F1-60-MAGs149;s__	GCF_900115155.1	86.654	0.02	Presence
SLM_MC1B_24-A19	2~4 cm	SAMN40274472	JBCKBM000000000	8715934	8265679	8262050	8261696	460063	1347503	59.7871	98	93056	24930	0.628563	58.4483	0	1435	0.921426	d__Bacteria;p__Actinobacteriota;c__Thermoleophilia;o__Gaiellales;f__F1-60-MAGs149;g__F1-60-MAGs149;s__	2.30546e+06	d__Bacteria;p__Actinobacteriota;c__Thermoleophilia;o__Gaiellales;f__F1-60-MAGs149;g__F1-60-MAGs149;s__	GCF_014195445.1	86.048	0	Presence
SLM_MC1B_24-K21	2~4 cm	SAMN40274473	JBCKBN000000000	8080106	7657760	7655230	7655057	529416	1513331	60.9621	115	48195	18034	0.627433	67.658	0	1584	0.926403	d__Bacteria;p__Actinobacteriota;c__Thermoleophilia;o__Gaiellales;f__F1-60-MAGs149;g__F1-60-MAGs149;s__	2.23673e+06	d__Bacteria;p__Actinobacteriota;c__Thermoleophilia;o__Gaiellales;f__F1-60-MAGs149;g__F1-60-MAGs149;s__	GCA_002890585.1	83.2151	0	Presence
SLM_MC1B_68-A09	6~8 cm	SAMN40274474	JBCKBO000000000	9020284	8546000	8542258	8542250	457308	1262769	64.1527	78	81087	27316	0.625852	48.2759	0	1303	0.921546	d__Bacteria;p__Actinobacteriota;c__Thermoleophilia;o__Gaiellales;f__F1-60-MAGs149;g__F1-60-MAGs149;s__	2.61574e+06	d__Bacteria;p__Actinobacteriota;c__Thermoleophilia;o__Gaiellales;f__F1-60-MAGs149;g__F1-60-MAGs149;s__	GCF_007164525.1	87.7217	0	Presence
SLM_MC1B_24-M04	2~4 cm	SAMN40274475	JBCKBP000000000	8197783	7697310	7690586	7690534	394814	1158964	59.2574	89	73608	18173	0.62625	64.7989	0	1206	0.932613	d__Bacteria;p__Actinobacteriota;c__Thermoleophilia;o__Gaiellales;f__F1-60-MAGs149;g__F1-60-MAGs149;s__	1.78856e+06	d__Bacteria;p__Actinobacteriota;c__Thermoleophilia;o__Gaiellales;f__F1-60-MAGs149;g__F1-60-MAGs149;s__	GCA_902373435.1	78.9814	0	Absence
SLM_MC1B_68-K18	6~8 cm	SAMN40274476	JBCKBQ000000000	8990755	8423946	8418976	8418974	358645	1049862	60.2635	91	54357	15850	0.628533	57.6724	0	1112	0.928795	d__Bacteria;p__Actinobacteriota;c__Thermoleophilia;o__Gaiellales;f__F1-60-MAGs149;g__F1-60-MAGs149;s__	1.82039e+06	d__Bacteria;p__Actinobacteriota;c__Thermoleophilia;o__Gaiellales;f__F1-60-MAGs149;g__F1-60-MAGs149;s__	GCF_014764705.1	84.4693	0	Presence
SLM_MC1B_24-O05	2~4 cm	SAMN40274477	JBCKBR000000000	7518813	7101771	7096947	7096818	721358	1988948	63.5768	110	141419	30084	0.628534	70.6897	0	2018	0.927638	d__Bacteria;p__Actinobacteriota;c__Thermoleophilia;o__Gaiellales;f__F1-60-MAGs149;g__F1-60-MAGs149;s__	2.81363e+06	d__Bacteria;p__Actinobacteriota;c__Thermoleophilia;o__Gaiellales;f__F1-60-MAGs149;g__F1-60-MAGs149;s__	GCF_002088235.1	85.829	0.01	Presence
SLM_MC1B_68-F08	6~8 cm	SAMN40274478	JBCKBS000000000	9926715	9478058	9444285	9444280	694381	1884351	63.8358	146	59020	21200	0.693006	31.6092	0	2065	0.909508	d__Bacteria;p__Actinobacteriota;c__Thermoleophilia;o__Gaiellales;f__Gaiellaceae;g__JACCRW01;s__	5.9614e+06	d__Bacteria;p__Actinobacteriota;c__Thermoleophilia;o__Gaiellales;f__Gaiellaceae;g__JACCRW01;s__	GCA_013813345.1	80.2683	0.33	Absence
SLM_MC1B_68-B07	6~8 cm	SAMN40274479	JBCKBT000000000	9930355	9247401	9198017	9197982	575400	1441855	61.5995	137	65030	16030	0.690004	31.6667	1.72414	1645	0.90033	d__Bacteria;p__Actinobacteriota;c__Thermoleophilia;o__Gaiellales;f__Gaiellaceae;g__JACCRW01;s__	4.55323e+06	d__Bacteria;p__Actinobacteriota;c__Thermoleophilia;o__Gaiellales;f__Gaiellaceae;g__JACCRW01;s__	GCA_013813345.1	79.4933	0.29	Absence
SLM_MC1B_68-N14	6~8 cm	SAMN40274480	JBCKBU000000000	8598338	8231603	8212882	8212882	313158	943016	54.59	120	41816	11051	0.689263	23.7069	0	1121	0.890743	d__Bacteria;p__Actinobacteriota;c__Thermoleophilia;o__Gaiellales;f__Gaiellaceae;g__JACCRW01;s__	3.97781e+06	d__Bacteria;p__Actinobacteriota;c__Thermoleophilia;o__Gaiellales;f__Gaiellaceae;g__JACCRW01;s__	GCA_015711825.1	86.418	0.01	Presence
SLM_MC1B_46-K11	4~6 cm	SAMN40274481	JBCKBV000000000	11440710	10857159	10818226	10818221	270505	801717	56.5906	70	74631	14764	0.699818	16.6379	0.431034	928	0.897364	d__Bacteria;p__Actinobacteriota;c__Thermoleophilia;o__Gaiellales;f__Gaiellaceae;g__;s__	4.81861e+06	d__Bacteria;p__Actinobacteriota;c__Thermoleophilia;o__Gaiellales;f__Gaiellaceae;g__;s__	GCF_000814825.1	84.365	0.01	Presence
SLM_MC1B_24-M10	2~4 cm	SAMN40274482	JBCKBW000000000	8226806	7757081	7716161	7716045	389029	1176191	56.7475	85	110151	26184	0.700501	26.5086	0	1267	0.904475	d__Bacteria;p__Actinobacteriota;c__Thermoleophilia;o__Gaiellales;f__Gaiellaceae;g__;s__	4.43701e+06	d__Bacteria;p__Actinobacteriota;c__Thermoleophilia;o__Gaiellales;f__Gaiellaceae;g__;s__	GCA_013042765.1	80.1372	0.01	Absence
SLM_MC1B_68-N23	6~8 cm	SAMN40274483	JBCKBX000000000	9486740	9142576	9109408	9109404	331737	1117408	51.9777	75	109115	26205	0.708692	44.0805	0	1279	0.894218	d__Bacteria;p__Actinobacteriota;c__Thermoleophilia;o__Gaiellales;f__Gaiellaceae;g__;s__	2.53493e+06	d__Bacteria;p__Actinobacteriota;c__Thermoleophilia;o__Gaiellales;f__Gaiellaceae;g__;s__	GCF_000234355.1	82.3983	0	Absence
SLM_LV1_BS-B14	BulkSediment	SAMN40274484	JBCKBY000000000	7840168	7546816	7535581	7535550	821600	2198481	65.1656	186	84040	18948	0.669908	74.023	1.72414	2378	0.91592	d__Bacteria;p__Actinobacteriota;c__Thermoleophilia;o__Gaiellales;f__Gaiellaceae;g__GMQP-bins7;s__	2.97e+06	d__Bacteria;p__Actinobacteriota;c__Thermoleophilia;o__Gaiellales;f__Gaiellaceae;g__GMQP-bins7;s__	GCA_016844515.1	87.4952	0.54	Absence
SLM_MC1B_68-G14	6~8 cm	SAMN40274485	JBCKBZ000000000	7579431	7194255	7167922	7167917	215377	867210	41.5439	66	63397	19236	0.670667	8.33333	0	959	0.885187	d__Bacteria;p__Actinobacteriota;c__Thermoleophilia;o__Gaiellales;f__Gaiellaceae;g__Gaiella;s__	1.04065e+07	d__Bacteria;p__Actinobacteriota;c__Thermoleophilia;o__Gaiellales;f__Gaiellaceae;g__Gaiella;s__	GCF_000975135.1	84.8099	0	Presence
SLM_MC1B_68-P11	6~8 cm	SAMN40274486	JBCKCA000000000	7526406	7061135	7060135	7060114	378931	877397	75.7414	59	117435	25262	0.537684	38.7931	0	953	0.915277	d__Bacteria;p__Actinobacteriota;c__Actinomycetia;o__Nanopelagicales;f__S36-B12;g__UBA4592;s__	2.26173e+06	d__Bacteria;p__Actinobacteriota;c__Actinomycetia;o__Nanopelagicales;f__S36-B12;g__UBA4592;s__	GCA_905181745.1	79.6376	0.19	Absence
SLM_MC1B_24-L20	2~4 cm	SAMN40274487	JBCKCB000000000	7319272	6951447	6950403	6950280	707141	1835535	68.2454	84	142645	51094	0.537082	70.444	0.540541	1954	0.910795	d__Bacteria;p__Actinobacteriota;c__Actinomycetia;o__Nanopelagicales;f__S36-B12;g__UBA4592;s__	2.60566e+06	d__Bacteria;p__Actinobacteriota;c__Actinomycetia;o__Nanopelagicales;f__S36-B12;g__UBA4592;s__	GCF_900176255.2	83.5027	0.01	Presence
SLM_LV1_BS-K19	BulkSediment	SAMN40274488	JBCKCC000000000	7442452	6957929	6956887	6956877	462384	1424990	57.3673	90	87381	30667	0.538491	55.6306	0.720721	1582	0.914141	d__Bacteria;p__Actinobacteriota;c__Actinomycetia;o__Nanopelagicales;f__S36-B12;g__UBA4592;s__	2.56152e+06	d__Bacteria;p__Actinobacteriota;c__Actinomycetia;o__Nanopelagicales;f__S36-B12;g__UBA4592;s__	GCA_002365735.1	79.5042	0.42	Absence
SLM_MC1B_68-C20	6~8 cm	SAMN40274489	JBCKCD000000000	8726248	8264702	8260745	8260740	393816	1271436	54.2026	79	92648	33696	0.544705	42.7027	0	1377	0.903905	d__Bacteria;p__Actinobacteriota;c__Actinomycetia;o__Nanopelagicales;f__S36-B12;g__UBA4592;s__	2.97741e+06	d__Bacteria;p__Actinobacteriota;c__Actinomycetia;o__Nanopelagicales;f__S36-B12;g__UBA4592;s__	GCA_905181745.1	79.7842	0.2	Absence
SLM_MC1B_46-F14	4~6 cm	SAMN40274490	JBCKCE000000000	9132043	8581929	8580393	8580390	828220	2150428	69.2281	81	119163	46613	0.539175	79.6654	1.35135	2296	0.911826	d__Bacteria;p__Actinobacteriota;c__Actinomycetia;o__Nanopelagicales;f__S36-B12;g__UBA4592;s__	2.69933e+06	d__Bacteria;p__Actinobacteriota;c__Actinomycetia;o__Nanopelagicales;f__S36-B12;g__UBA4592;s__	GCF_900108055.1	83.9057	0	Presence
SLM_LV1_0830-P05	0.8~3.0 um	SAMN40274491	JBCKCF000000000	11102948	10480552	10478350	10478326	564631	1491698	67.334	66	115108	39605	0.542503	52.4324	0	1641	0.90888	d__Bacteria;p__Actinobacteriota;c__Actinomycetia;o__Nanopelagicales;f__S36-B12;g__UBA4592;s__	2.84499e+06	d__Bacteria;p__Actinobacteriota;c__Actinomycetia;o__Nanopelagicales;f__S36-B12;g__UBA4592;s__	GCA_002365735.1	80.0398	0.41	Absence
SLM_MC1B_02-B15	0~2 cm	SAMN40274492	JBCKCG000000000	6725116	6291684	6290615	6290601	213730	525373	68.7331	59	26672	14592	0.529165	17.2414	0	602	0.910327	d__Bacteria;p__Actinobacteriota;c__Actinomycetia;o__Nanopelagicales;f__S36-B12;g__UBA4592;s__	3.04716e+06	d__Bacteria;p__Actinobacteriota;c__Actinomycetia;o__Nanopelagicales;f__S36-B12;g__UBA4592;s__	GCA_002365735.1	79.5812	0.36	Absence
SLM_LV1_BS-C13	BulkSediment	SAMN40274493	JBCKCH000000000	8912803	8259641	8258130	8258085	478142	1401438	59.4885	78	78091	30753	0.536037	55.1724	0	1513	0.911361	d__Bacteria;p__Actinobacteriota;c__Actinomycetia;o__Nanopelagicales;f__S36-B12;g__UBA4592;s__	2.54011e+06	d__Bacteria;p__Actinobacteriota;c__Actinomycetia;o__Nanopelagicales;f__S36-B12;g__UBA4592;s__	GCF_003626655.1	82.6056	0	Presence
SLM_MC1B_46-G05	4~6 cm	SAMN40274494	JBCKCI000000000	8674950	8189085	8188266	8188263	332125	885716	67.9669	30	195865	66421	0.546709	32.7586	0	975	0.907247	d__Bacteria;p__Actinobacteriota;c__Actinomycetia;o__Nanopelagicales;f__S36-B12;g__UBA4592;s__	2.70376e+06	d__Bacteria;p__Actinobacteriota;c__Actinomycetia;o__Nanopelagicales;f__S36-B12;g__UBA4592;s__	GCA_016870195.1	80.0365	0.03	Presence
SLM_MC1B_46-J20	4~6 cm	SAMN40274495	JBCKCJ000000000	7121820	6748549	6747782	6747773	436470	1302369	60.2329	98	99386	20502	0.542743	43.3012	0.810811	1438	0.90022	d__Bacteria;p__Actinobacteriota;c__Actinomycetia;o__Nanopelagicales;f__S36-B12;g__UBA4592;s__	3.0077e+06	d__Bacteria;p__Actinobacteriota;c__Actinomycetia;o__Nanopelagicales;f__S36-B12;g__UBA4592;s__	GCF_013414345.1	88.9215	0.01	Presence
SLM_MC1B_02-M18	0~2 cm	SAMN40274496	JBCKCK000000000	6630744	6230950	6229227	6229223	1036925	2449849	75.3145	76	154800	64095	0.543823	92.0669	3.02703	2658	0.908728	d__Bacteria;p__Actinobacteriota;c__Actinomycetia;o__Nanopelagicales;f__S36-B12;g__UBA4592;s__	2.66094e+06	d__Bacteria;p__Actinobacteriota;c__Actinomycetia;o__Nanopelagicales;f__S36-B12;g__UBA4592;s__	GCF_018476905.1	83.9931	0	Presence
SLM_MC1B_68-I06	6~8 cm	SAMN40274497	JBCKCL000000000	7106595	6658757	6657801	6657799	590616	1602207	66.8153	70	119030	38108	0.540211	65.9588	0.540541	1703	0.912712	d__Bacteria;p__Actinobacteriota;c__Actinomycetia;o__Nanopelagicales;f__S36-B12;g__UBA4592;s__	2.4291e+06	d__Bacteria;p__Actinobacteriota;c__Actinomycetia;o__Nanopelagicales;f__S36-B12;g__UBA4592;s__	GCA_002365735.1	79.1663	0.37	Presence
SLM_MC1B_24-O16	2~4 cm	SAMN40274498	JBCKCM000000000	7520320	7093163	7091222	7091142	584265	1477268	69.5992	58	167600	46615	0.54284	55.0193	0.540541	1595	0.904635	d__Bacteria;p__Actinobacteriota;c__Actinomycetia;o__Nanopelagicales;f__S36-B12;g__UBA4592;s__	2.685e+06	d__Bacteria;p__Actinobacteriota;c__Actinomycetia;o__Nanopelagicales;f__S36-B12;g__UBA4592;s__	GCA_905181745.1	80.0697	0.33	Absence
SLM_LV1_0208-E18	0.2~0.8 um	SAMN40274499	JBCKCN000000000	7851089	7358778	7357763	7357750	151617	370309	66.5651	58	15503	7560	0.530357	12.931	0	418	0.914112	d__Bacteria;p__Actinobacteriota;c__Actinomycetia;o__Nanopelagicales;f__S36-B12;g__UBA4592;s__	2.86372e+06	d__Bacteria;p__Actinobacteriota;c__Actinomycetia;o__Nanopelagicales;f__S36-B12;g__UBA4592;s__				Absence
SLM_LV1_BS-E10	BulkSediment	SAMN40274500	JBCKCO000000000	8574074	8069668	8067773	8067618	277253	862226	56.893	71	78551	22521	0.533853	27.5862	0	945	0.914723	d__Bacteria;p__Actinobacteriota;c__Actinomycetia;o__Nanopelagicales;f__S36-B12;g__UBA4592;s__	3.12557e+06	d__Bacteria;p__Actinobacteriota;c__Actinomycetia;o__Nanopelagicales;f__S36-B12;g__UBA4592;s__	GCA_002365735.1	79.5502	0.4	Presence
SLM_MC1B_46-J22	4~6 cm	SAMN40274501	JBCKCP000000000	7921757	7546513	7544706	7544691	912345	2236015	72.7048	113	123153	39864	0.540896	81.9048	0.810811	2422	0.903041	d__Bacteria;p__Actinobacteriota;c__Actinomycetia;o__Nanopelagicales;f__S36-B12;g__UBA4592;s__	2.73002e+06	d__Bacteria;p__Actinobacteriota;c__Actinomycetia;o__Nanopelagicales;f__S36-B12;g__UBA4592;s__	GCA_002150995.1	85.5615	0	Presence
SLM_MC1B_24-F14	2~4 cm	SAMN40274502	JBCKCQ000000000	7994761	7445903	7444097	7444027	802192	2035168	69.0874	81	144889	46473	0.54487	79.7426	1.35135	2220	0.901756	d__Bacteria;p__Actinobacteriota;c__Actinomycetia;o__Nanopelagicales;f__S36-B12;g__UBA4592;s__	2.55217e+06	d__Bacteria;p__Actinobacteriota;c__Actinomycetia;o__Nanopelagicales;f__S36-B12;g__UBA4592;s__	GCA_003577145.1	84.2595	0.01	Presence
SLM_MC1B_24-K20	2~4 cm	SAMN40274503	JBCKCR000000000	7425191	6939288	6937605	6937526	550604	1453362	66.2321	86	92639	34559	0.535827	60.103	0.540541	1560	0.912933	d__Bacteria;p__Actinobacteriota;c__Actinomycetia;o__Nanopelagicales;f__S36-B12;g__UBA4592;s__	2.41812e+06	d__Bacteria;p__Actinobacteriota;c__Actinomycetia;o__Nanopelagicales;f__S36-B12;g__UBA4592;s__	GCA_002365735.1	79.8768	0.45	Presence
SLM_MC1B_68-I22	6~8 cm	SAMN40274504	JBCKCS000000000	7435839	7046555	7045742	7045739	456906	1300983	62.9688	74	83412	32156	0.540631	56.0129	0.27027	1453	0.91064	d__Bacteria;p__Actinobacteriota;c__Actinomycetia;o__Nanopelagicales;f__S36-B12;g__UBA4592;s__	2.32265e+06	d__Bacteria;p__Actinobacteriota;c__Actinomycetia;o__Nanopelagicales;f__S36-B12;g__UBA4592;s__	GCA_905181745.1	79.8586	0.25	Absence
SLM_LV1_BS-A20	BulkSediment	SAMN40274505	JBCKCT000000000	6997495	6596998	6595435	6595427	813555	2069549	69.504	91	109678	47744	0.543645	86.5894	0.810811	2247	0.903035	d__Bacteria;p__Actinobacteriota;c__Actinomycetia;o__Nanopelagicales;f__S36-B12;g__UBA4592;s__	2.39007e+06	d__Bacteria;p__Actinobacteriota;c__Actinomycetia;o__Nanopelagicales;f__S36-B12;g__UBA4592;s__	GCF_900108055.1	83.7549	0	Presence
SLM_MC1B_68-G05	6~8 cm	SAMN40274506	JBCKCU000000000	7874791	7421358	7417304	7417282	693759	1738336	71.3225	81	95789	43222	0.538648	65.4093	1.08108	1886	0.908691	d__Bacteria;p__Actinobacteriota;c__Actinomycetia;o__Nanopelagicales;f__S36-B12;g__UBA4592;s__	2.65763e+06	d__Bacteria;p__Actinobacteriota;c__Actinomycetia;o__Nanopelagicales;f__S36-B12;g__UBA4592;s__	GCF_016907085.1	81.7077	0.01	Presence
SLM_MC1B_810-B20	8~10 cm	SAMN40274507	JBCKCV000000000	7788271	7343532	7342349	7342274	476691	1739304	48.5527	78	94692	48615	0.539436	64.6847	1.62162	1872	0.915494	d__Bacteria;p__Actinobacteriota;c__Actinomycetia;o__Nanopelagicales;f__S36-B12;g__UBA4592;s__	2.6889e+06	d__Bacteria;p__Actinobacteriota;c__Actinomycetia;o__Nanopelagicales;f__S36-B12;g__UBA4592;s__	GCA_002365735.1	79.783	0.37	Absence
SLM_MC1B_46-D16	4~6 cm	SAMN40274508	JBCKCW000000000	8125087	7585026	7582529	7582476	375558	1034693	61.686	108	34520	15071	0.539132	39.7439	0.720721	1186	0.910826	d__Bacteria;p__Actinobacteriota;c__Actinomycetia;o__Nanopelagicales;f__S36-B12;g__UBA4592;s__	2.6034e+06	d__Bacteria;p__Actinobacteriota;c__Actinomycetia;o__Nanopelagicales;f__S36-B12;g__UBA4592;s__	GCA_905181745.1	80.4205	0.25	Presence
SLM_MC1B_46-L05	4~6 cm	SAMN40274509	JBCKCX000000000	7982313	7498406	7496689	7496685	739093	1815997	73.5031	103	112149	28351	0.542675	69.4144	1.08108	2051	0.904354	d__Bacteria;p__Actinobacteriota;c__Actinomycetia;o__Nanopelagicales;f__S36-B12;g__UBA4592;s__	2.61617e+06	d__Bacteria;p__Actinobacteriota;c__Actinomycetia;o__Nanopelagicales;f__S36-B12;g__UBA4592;s__	GCA_002365735.1	79.7553	0.38	Absence
SLM_MC1B_46-A06	4~6 cm	SAMN40274510	JBCKCY000000000	8423695	7916174	7915185	7915182	298971	810344	65.8955	46	94680	24857	0.539173	43.9655	0	879	0.922624	d__Bacteria;p__Actinobacteriota;c__Actinomycetia;o__Nanopelagicales;f__S36-B12;g__UBA4592;s__	1.84314e+06	d__Bacteria;p__Actinobacteriota;c__Actinomycetia;o__Nanopelagicales;f__S36-B12;g__UBA4592;s__	GCA_002365735.1	79.7209	0.43	Absence
SLM_MC1B_02-F19	0~2 cm	SAMN40274511	JBCKCZ000000000	7941520	7514612	7513279	7513278	628215	1510677	71.3983	112	54203	24169	0.543034	46.5517	0	1729	0.909184	d__Bacteria;p__Actinobacteriota;c__Actinomycetia;o__Nanopelagicales;f__S36-B12;g__UBA4592;s__	3.24516e+06	d__Bacteria;p__Actinobacteriota;c__Actinomycetia;o__Nanopelagicales;f__S36-B12;g__UBA4592;s__	GCF_009720385.1	80.3473	0.02	Absence
SLM_MC1B_46-O19	4~6 cm	SAMN40274512	JBCKDA000000000	7748548	7186701	7184006	7183950	719817	1869752	67.062	114	81262	24507	0.542206	81.184	1.8018	2058	0.907122	d__Bacteria;p__Actinobacteriota;c__Actinomycetia;o__Nanopelagicales;f__S36-B12;g__UBA4592;s__	2.3031e+06	d__Bacteria;p__Actinobacteriota;c__Actinomycetia;o__Nanopelagicales;f__S36-B12;g__UBA4592;s__	GCF_000355695.1	84.9548	0.01	Presence
SLM_MC1B_46-B06	4~6 cm	SAMN40274513	JBCKDB000000000	8687904	8131395	8128773	8128752	716774	1800232	68.4792	111	79937	29427	0.545819	72.1441	0	2025	0.905084	d__Bacteria;p__Actinobacteriota;c__Actinomycetia;o__Nanopelagicales;f__S36-B12;g__UBA4592;s__	2.49533e+06	d__Bacteria;p__Actinobacteriota;c__Actinomycetia;o__Nanopelagicales;f__S36-B12;g__UBA4592;s__	GCA_002365735.1	79.301	0.37	Absence
SLM_LV1_BS-I21	BulkSediment	SAMN40274514	JBCKDC000000000	7295494	6857667	6855591	6855588	829648	2141994	67.1988	124	83754	30136	0.548136	73.1579	1.44737	2325	0.907702	d__Bacteria;p__Actinobacteriota;c__Actinomycetia;o__Nanopelagicales;f__S36-B12;g__UBA4592;s__	2.92791e+06	d__Bacteria;p__Actinobacteriota;c__Actinomycetia;o__Nanopelagicales;f__S36-B12;g__UBA4592;s__	GCF_013002705.1	90.1052	0.01	Presence
SLM_MC1B_24-B07	2~4 cm	SAMN40274515	JBCKDD000000000	6947468	6533567	6532382	6532361	313122	942030	57.9959	85	68510	17074	0.534535	28.3333	0	1069	0.910291	d__Bacteria;p__Actinobacteriota;c__Actinomycetia;o__Nanopelagicales;f__S36-B12;g__UBA4592;s__	3.32481e+06	d__Bacteria;p__Actinobacteriota;c__Actinomycetia;o__Nanopelagicales;f__S36-B12;g__UBA4592;s__	GCA_905181745.1	80.2719	0.25	Presence
SLM_MC1B_24-J15	2~4 cm	SAMN40274516	JBCKDE000000000	8681448	8125002	8123682	8123560	409783	1021962	69.1874	68	88600	29561	0.540071	38.0878	0	1101	0.918664	d__Bacteria;p__Actinobacteriota;c__Actinomycetia;o__Nanopelagicales;f__S36-B12;g__UBA4592;s__	2.68318e+06	d__Bacteria;p__Actinobacteriota;c__Actinomycetia;o__Nanopelagicales;f__S36-B12;g__UBA4592;s__	GCA_002365735.1	79.6343	0.39	Absence
SLM_MC1B_24-D23	2~4 cm	SAMN40274517	JBCKDF000000000	8775324	8198584	8195304	8193771	617539	1772294	60.7126	83	121158	37809	0.541216	70.0129	0.540541	1933	0.913001	d__Bacteria;p__Actinobacteriota;c__Actinomycetia;o__Nanopelagicales;f__S36-B12;g__UBA4592;s__	2.53138e+06	d__Bacteria;p__Actinobacteriota;c__Actinomycetia;o__Nanopelagicales;f__S36-B12;g__UBA4592;s__	GCF_004346185.1	82.5265	0	Presence
SLM_MC1B_46-J06	4~6 cm	SAMN40274518	JBCKDG000000000	8285361	7874307	7873122	7873112	739041	1972778	68.3537	68	170234	55737	0.536374	79.8005	0.540541	2092	0.909756	d__Bacteria;p__Actinobacteriota;c__Actinomycetia;o__Nanopelagicales;f__S36-B12;g__UBA4592;s__	2.47214e+06	d__Bacteria;p__Actinobacteriota;c__Actinomycetia;o__Nanopelagicales;f__S36-B12;g__UBA4592;s__	GCF_013404595.1	83.1533	0	Presence
SLM_LV1_0208-I21	0.2~0.8 um	SAMN40274519	JBCKDH000000000	7728649	7193666	7192659	7192646	444877	1202379	66.4685	55	74688	45680	0.539548	57.0849	0.540541	1292	0.910677	d__Bacteria;p__Actinobacteriota;c__Actinomycetia;o__Nanopelagicales;f__S36-B12;g__UBA4592;s__	2.1063e+06	d__Bacteria;p__Actinobacteriota;c__Actinomycetia;o__Nanopelagicales;f__S36-B12;g__UBA4592;s__	GCA_905181745.1	79.6545	0.28	Absence
SLM_MC1B_02-F05	0~2 cm	SAMN40274520	JBCKDI000000000	8322167	7783188	7781885	7781881	905378	2251067	71.697	68	156877	70539	0.546525	80.3282	1.26126	2386	0.911875	d__Bacteria;p__Actinobacteriota;c__Actinomycetia;o__Nanopelagicales;f__S36-B12;g__UBA4592;s__	2.80234e+06	d__Bacteria;p__Actinobacteriota;c__Actinomycetia;o__Nanopelagicales;f__S36-B12;g__UBA4592;s__	GCF_014205075.1	84.308	0.01	Presence
SLM_MC1B_68-F03	6~8 cm	SAMN40274521	JBCKDJ000000000	7463911	7030496	7029158	7029156	720667	1858792	70.4118	64	173839	46307	0.538664	78.3848	1.08108	1999	0.910775	d__Bacteria;p__Actinobacteriota;c__Actinomycetia;o__Nanopelagicales;f__S36-B12;g__UBA4592;s__	2.37137e+06	d__Bacteria;p__Actinobacteriota;c__Actinomycetia;o__Nanopelagicales;f__S36-B12;g__UBA4592;s__	GCA_013821025.1	82.5446	0.01	Presence
SLM_MC1B_24-B19	2~4 cm	SAMN40274522	JBCKDK000000000	8301979	7791825	7790232	7790204	359038	1088055	58.6598	65	69429	27353	0.538121	46.5517	0	1177	0.904972	d__Bacteria;p__Actinobacteriota;c__Actinomycetia;o__Nanopelagicales;f__S36-B12;g__UBA4592;s__	2.3373e+06	d__Bacteria;p__Actinobacteriota;c__Actinomycetia;o__Nanopelagicales;f__S36-B12;g__UBA4592;s__	GCA_002365735.1	79.6565	0.41	Presence
SLM_MC1B_46-B13	4~6 cm	SAMN40274523	JBCKDL000000000	7427095	6891740	6890817	6890814	503287	1240436	71.4098	83	73702	22790	0.53891	56.8966	0	1367	0.925298	d__Bacteria;p__Actinobacteriota;c__Actinomycetia;o__Nanopelagicales;f__S36-B12;g__UBA4592;s__	2.18016e+06	d__Bacteria;p__Actinobacteriota;c__Actinomycetia;o__Nanopelagicales;f__S36-B12;g__UBA4592;s__	GCA_002365735.1	79.8767	0.4	Absence
SLM_MC1B_68-L05	6~8 cm	SAMN40274524	JBCKDM000000000	7866952	7348564	7347235	7347226	437582	1098581	71.3462	64	69876	31217	0.53954	25.8621	0	1249	0.905137	d__Bacteria;p__Actinobacteriota;c__Actinomycetia;o__Nanopelagicales;f__S36-B12;g__UBA4592;s__	4.24785e+06	d__Bacteria;p__Actinobacteriota;c__Actinomycetia;o__Nanopelagicales;f__S36-B12;g__UBA4592;s__	GCF_001981525.1	80.8489	0	Presence
SLM_MC1B_46-A15	4~6 cm	SAMN40274525	JBCKDN000000000	8633131	8106903	8105820	8105801	585491	1580308	66.2774	57	138777	54780	0.535499	76.7786	1.08108	1686	0.916557	d__Bacteria;p__Actinobacteriota;c__Actinomycetia;o__Nanopelagicales;f__S36-B12;g__UBA4592;s__	2.05827e+06	d__Bacteria;p__Actinobacteriota;c__Actinomycetia;o__Nanopelagicales;f__S36-B12;g__UBA4592;s__	GCF_001424835.1	80.0853	0.01	Presence
SLM_MC1B_24-N07	2~4 cm	SAMN40274526	JBCKDO000000000	7720199	7259731	7258504	7258317	755922	1814808	73.6837	76	132972	39389	0.537702	74.4916	1.08108	1903	0.916355	d__Bacteria;p__Actinobacteriota;c__Actinomycetia;o__Nanopelagicales;f__S36-B12;g__UBA4592;s__	2.43626e+06	d__Bacteria;p__Actinobacteriota;c__Actinomycetia;o__Nanopelagicales;f__S36-B12;g__UBA4592;s__	GCA_002365735.1	79.4934	0.42	Presence
SLM_MC1B_02-N14	0~2 cm	SAMN40274527	JBCKDP000000000	7147924	6760082	6758712	6758706	647020	1717558	67.0324	72	134667	42247	0.533503	69.3115	0.540541	1872	0.906887	d__Bacteria;p__Actinobacteriota;c__Actinomycetia;o__Nanopelagicales;f__S36-B12;g__UBA4592;s__	2.47803e+06	d__Bacteria;p__Actinobacteriota;c__Actinomycetia;o__Nanopelagicales;f__S36-B12;g__UBA4592;s__	GCA_905181745.1	79.7879	0.39	Presence
SLM_MC1B_02-E03	0~2 cm	SAMN40274528	JBCKDQ000000000	9968644	9186943	9185060	9185006	722780	1769830	71.3372	74	104312	40000	0.540725	51.7241	0	1902	0.906597	d__Bacteria;p__Actinobacteriota;c__Actinomycetia;o__Nanopelagicales;f__S36-B12;g__UBA4592;s__	3.42167e+06	d__Bacteria;p__Actinobacteriota;c__Actinomycetia;o__Nanopelagicales;f__S36-B12;g__UBA4592;s__	GCF_002362255.1	82.1497	0	Presence
SLM_MC1B_02-K21	0~2 cm	SAMN40274529	JBCKDR000000000	7472260	7030884	7029693	7029667	701598	1766339	69.6658	96	81940	32571	0.540369	61.9369	2.43243	1922	0.911986	d__Bacteria;p__Actinobacteriota;c__Actinomycetia;o__Nanopelagicales;f__S36-B12;g__UBA4592;s__	2.85183e+06	d__Bacteria;p__Actinobacteriota;c__Actinomycetia;o__Nanopelagicales;f__S36-B12;g__UBA4592;s__	GCF_017355885.1	81.7398	0	Presence
SLM_MC1B_46-B03	4~6 cm	SAMN40274530	JBCKDS000000000	7026665	6606409	6605356	6605354	674785	1838951	66.171	64	163876	62246	0.537062	78.1274	0.540541	1966	0.911506	d__Bacteria;p__Actinobacteriota;c__Actinomycetia;o__Nanopelagicales;f__S36-B12;g__UBA4592;s__	2.35378e+06	d__Bacteria;p__Actinobacteriota;c__Actinomycetia;o__Nanopelagicales;f__S36-B12;g__UBA4592;s__	GCF_014205075.1	81.6741	0.01	Presence
SLM_MC1B_46-L23	4~6 cm	SAMN40274531	JBCKDT000000000	7073314	6719800	6718609	6718608	321929	784430	73.8448	51	100739	23883	0.536514	43.7194	0.27027	857	0.92378	d__Bacteria;p__Actinobacteriota;c__Actinomycetia;o__Nanopelagicales;f__S36-B12;g__UBA4592;s__	1.79424e+06	d__Bacteria;p__Actinobacteriota;c__Actinomycetia;o__Nanopelagicales;f__S36-B12;g__UBA4592;s__	GCA_905181745.1	80.3845	0.27	Presence
SLM_MC1B_46-D08	4~6 cm	SAMN40274532	JBCKDU000000000	7703965	7208169	7206861	7206858	426983	1427186	53.6045	66	91394	43398	0.534088	48.6486	0.540541	1542	0.910125	d__Bacteria;p__Actinobacteriota;c__Actinomycetia;o__Nanopelagicales;f__S36-B12;g__UBA4592;s__	2.93366e+06	d__Bacteria;p__Actinobacteriota;c__Actinomycetia;o__Nanopelagicales;f__S36-B12;g__UBA4592;s__	GCA_002365735.1	80.0261	0.35	Absence
SLM_MC1B_02-M04	0~2 cm	SAMN40274533	JBCKDV000000000	8236747	7821195	7820339	7820329	269154	718738	66.1977	44	91328	27210	0.540509	29.3103	0	782	0.909817	d__Bacteria;p__Actinobacteriota;c__Actinomycetia;o__Nanopelagicales;f__S36-B12;g__UBA4592;s__	2.45216e+06	d__Bacteria;p__Actinobacteriota;c__Actinomycetia;o__Nanopelagicales;f__S36-B12;g__UBA4592;s__	GCA_002365735.1	80.0878	0.4	Absence
SLM_MC1B_46-A02	4~6 cm	SAMN40274534	JBCKDW000000000	8450048	8017192	8016006	8016002	758475	1869906	72.7632	85	86406	31843	0.542125	76.3192	1.21622	2004	0.909853	d__Bacteria;p__Actinobacteriota;c__Actinomycetia;o__Nanopelagicales;f__S36-B12;g__UBA4592;s__	2.45011e+06	d__Bacteria;p__Actinobacteriota;c__Actinomycetia;o__Nanopelagicales;f__S36-B12;g__UBA4592;s__	GCA_905181745.1	79.6183	0.41	Absence
SLM_MC1B_46-E13	4~6 cm	SAMN40274535	JBCKDX000000000	6840643	6445129	6444295	6444293	97612	237773	73.9858	6	108046	54556	0.539994	12.069	0	242	0.908816	d__Bacteria;p__Actinobacteriota;c__Actinomycetia;o__Nanopelagicales;f__S36-B12;g__UBA4592;s__	1.97012e+06	d__Bacteria;p__Actinobacteriota;c__Actinomycetia;o__Nanopelagicales;f__S36-B12;g__UBA4592;s__	GCA_002365735.1	80.5563	0.51	Absence
SLM_MC1B_46-I02	4~6 cm	SAMN40274536	JBCKDY000000000	7086482	6706095	6704730	6704725	450298	1156197	70.3759	57	96524	35723	0.537707	47.4138	0	1235	0.911165	d__Bacteria;p__Actinobacteriota;c__Actinomycetia;o__Nanopelagicales;f__S36-B12;g__UBA4592;s__	2.43852e+06	d__Bacteria;p__Actinobacteriota;c__Actinomycetia;o__Nanopelagicales;f__S36-B12;g__UBA4592;s__	GCF_003600895.1	80.1839	0.02	Presence
SLM_MC1B_46-K20	4~6 cm	SAMN40274537	JBCKDZ000000000	7278846	6890237	6888477	6888474	432766	1289805	60.2592	66	91029	40842	0.537721	56.2291	0	1402	0.910473	d__Bacteria;p__Actinobacteriota;c__Actinomycetia;o__Nanopelagicales;f__S36-B12;g__UBA4592;s__	2.29384e+06	d__Bacteria;p__Actinobacteriota;c__Actinomycetia;o__Nanopelagicales;f__S36-B12;g__UBA4592;s__	GCA_905181745.1	79.5879	0.31	Absence
SLM_LV1_BS-D03	BulkSediment	SAMN40274538	JBCKEA000000000	7890141	7543829	7543072	7543066	470226	1352507	61.7991	108	63838	20074	0.538372	58.6207	0	1504	0.91769	d__Bacteria;p__Actinobacteriota;c__Actinomycetia;o__Nanopelagicales;f__S36-B12;g__UBA4592;s__	2.30722e+06	d__Bacteria;p__Actinobacteriota;c__Actinomycetia;o__Nanopelagicales;f__S36-B12;g__UBA4592;s__	GCA_016703545.1	81.8612	0	Presence
SLM_MC1B_02-K11	0~2 cm	SAMN40274539	JBCKEB000000000	8793756	8215026	8213502	8213437	618044	1491723	72.6796	66	135129	41284	0.53556	65.2767	1.48649	1572	0.907165	d__Bacteria;p__Actinobacteriota;c__Actinomycetia;o__Nanopelagicales;f__S36-B12;g__UBA4592;s__	2.28523e+06	d__Bacteria;p__Actinobacteriota;c__Actinomycetia;o__Nanopelagicales;f__S36-B12;g__UBA4592;s__	GCF_007714205.1	80.0712	0.01	Presence
SLM_MC1B_46-P01	4~6 cm	SAMN40274540	JBCKEC000000000	7333062	6803939	6801968	6801889	785468	1983355	70.0281	71	174377	67767	0.54425	72.4138	0	2074	0.911716	d__Bacteria;p__Actinobacteriota;c__Actinomycetia;o__Nanopelagicales;f__S36-B12;g__UBA4592;s__	2.73892e+06	d__Bacteria;p__Actinobacteriota;c__Actinomycetia;o__Nanopelagicales;f__S36-B12;g__UBA4592;s__	GCF_006542425.1	82.0858	0	Presence
SLM_MC1B_46-B15	4~6 cm	SAMN40274541	JBCKED000000000	8899804	8320376	8317989	8317957	680263	1930468	62.4664	61	135953	53114	0.53637	79.0669	0.675676	2028	0.912354	d__Bacteria;p__Actinobacteriota;c__Actinomycetia;o__Nanopelagicales;f__S36-B12;g__UBA4592;s__	2.44156e+06	d__Bacteria;p__Actinobacteriota;c__Actinomycetia;o__Nanopelagicales;f__S36-B12;g__UBA4592;s__	GCA_002365735.1	79.5258	0.46	Presence
SLM_MC1B_46-G07	4~6 cm	SAMN40274542	JBCKEE000000000	9554530	8920466	8918154	8918147	606961	1551577	69.8571	88	87135	31104	0.538202	63.4234	1.35135	1660	0.917919	d__Bacteria;p__Actinobacteriota;c__Actinomycetia;o__Nanopelagicales;f__S36-B12;g__UBA4592;s__	2.44638e+06	d__Bacteria;p__Actinobacteriota;c__Actinomycetia;o__Nanopelagicales;f__S36-B12;g__UBA4592;s__	GCA_002365735.1	79.2298	0.37	Absence
SLM_MC1B_46-N13	4~6 cm	SAMN40274543	JBCKEF000000000	10404364	9942556	9940996	9940987	646360	1668484	70.8587	62	142612	47230	0.538135	67.2414	0	1778	0.91395	d__Bacteria;p__Actinobacteriota;c__Actinomycetia;o__Nanopelagicales;f__S36-B12;g__UBA4592;s__	2.48134e+06	d__Bacteria;p__Actinobacteriota;c__Actinomycetia;o__Nanopelagicales;f__S36-B12;g__UBA4592;s__	GCF_006542425.1	82.0858	0	Presence
SLM_MC1B_46-K22	4~6 cm	SAMN40274544	JBCKEG000000000	6758650	6402104	6400870	6400246	510393	1410194	65.518	65	152670	43001	0.530888	64.0798	0.540541	1471	0.92548	d__Bacteria;p__Actinobacteriota;c__Actinomycetia;o__Nanopelagicales;f__S36-B12;g__UBA4592;s__	2.20068e+06	d__Bacteria;p__Actinobacteriota;c__Actinomycetia;o__Nanopelagicales;f__S36-B12;g__UBA4592;s__	GCA_002365735.1	79.5631	0.43	Absence
SLM_MC1B_46-D19	4~6 cm	SAMN40274545	JBCKEH000000000	6831526	6410389	6409450	6409443	455015	1399969	58.2332	55	199224	53822	0.53233	67.3552	0	1471	0.918208	d__Bacteria;p__Actinobacteriota;c__Actinomycetia;o__Nanopelagicales;f__S36-B12;g__UBA4592;s__	2.07849e+06	d__Bacteria;p__Actinobacteriota;c__Actinomycetia;o__Nanopelagicales;f__S36-B12;g__UBA4592;s__	GCA_002365735.1	79.5813	0.39	Presence
SLM_MC1B_46-I04	4~6 cm	SAMN40274546	JBCKEI000000000	7572702	7140322	7138571	7138550	613508	1522407	71.4453	61	106753	38704	0.536705	69.1532	1.08108	1659	0.913463	d__Bacteria;p__Actinobacteriota;c__Actinomycetia;o__Nanopelagicales;f__S36-B12;g__UBA4592;s__	2.2015e+06	d__Bacteria;p__Actinobacteriota;c__Actinomycetia;o__Nanopelagicales;f__S36-B12;g__UBA4592;s__	GCF_012931845.1	81.566	0.01	Presence
SLM_MC1B_02-B10	0~2 cm	SAMN40274547	JBCKEJ000000000	7442764	6944789	6943513	6943491	662702	1698392	70.2582	69	116685	49261	0.537797	62.8958	0.540541	1774	0.912181	d__Bacteria;p__Actinobacteriota;c__Actinomycetia;o__Nanopelagicales;f__S36-B12;g__UBA4592;s__	2.70033e+06	d__Bacteria;p__Actinobacteriota;c__Actinomycetia;o__Nanopelagicales;f__S36-B12;g__UBA4592;s__	GCF_000177195.2	80.924	0.02	Presence
SLM_MC1B_46-P05	4~6 cm	SAMN40274548	JBCKEK000000000	8323272	7783214	7780275	7780246	545426	1358821	71.6172	51	126543	64533	0.539688	51.0811	0.540541	1457	0.908396	d__Bacteria;p__Actinobacteriota;c__Actinomycetia;o__Nanopelagicales;f__S36-B12;g__UBA4592;s__	2.66013e+06	d__Bacteria;p__Actinobacteriota;c__Actinomycetia;o__Nanopelagicales;f__S36-B12;g__UBA4592;s__	GCA_002365735.1	79.8228	0.41	Absence
SLM_MC1B_68-A21	6~8 cm	SAMN40274549	JBCKEL000000000	7439573	7000399	6998986	6998838	811215	2047067	70.389	66	196195	51863	0.541623	70.6885	1.8018	2231	0.911656	d__Bacteria;p__Actinobacteriota;c__Actinomycetia;o__Nanopelagicales;f__S36-B12;g__UBA4592;s__	2.8959e+06	d__Bacteria;p__Actinobacteriota;c__Actinomycetia;o__Nanopelagicales;f__S36-B12;g__UBA4592;s__	GCF_014126825.1	85.4684	0.01	Presence
SLM_LV1_BS-J05	BulkSediment	SAMN40274550	JBCKEM000000000	6881989	6469582	6468510	6468504	815456	2026341	71.9051	88	121742	51381	0.542696	77.1171	0.810811	2221	0.910703	d__Bacteria;p__Actinobacteriota;c__Actinomycetia;o__Nanopelagicales;f__S36-B12;g__UBA4592;s__	2.62762e+06	d__Bacteria;p__Actinobacteriota;c__Actinomycetia;o__Nanopelagicales;f__S36-B12;g__UBA4592;s__	GCA_905181745.1	79.5371	0.36	Absence
SLM_MC1B_46-I08	4~6 cm	SAMN40274551	JBCKEN000000000	9547066	8956964	8955513	8955511	587388	1603824	66.1827	99	102562	33141	0.53817	68.955	0	1790	0.909031	d__Bacteria;p__Actinobacteriota;c__Actinomycetia;o__Nanopelagicales;f__S36-B12;g__UBA4592;s__	2.3259e+06	d__Bacteria;p__Actinobacteriota;c__Actinomycetia;o__Nanopelagicales;f__S36-B12;g__UBA4592;s__	GCF_016907085.1	88.4636	0	Absence
SLM_MC1B_46-E06	4~6 cm	SAMN40274552	JBCKEO000000000	8514624	7975616	7974281	7974275	772195	1980269	70.906	54	285618	67374	0.538367	80.6885	1.08108	2145	0.912457	d__Bacteria;p__Actinobacteriota;c__Actinomycetia;o__Nanopelagicales;f__S36-B12;g__UBA4592;s__	2.45421e+06	d__Bacteria;p__Actinobacteriota;c__Actinomycetia;o__Nanopelagicales;f__S36-B12;g__UBA4592;s__	GCF_004564075.1	81.2475	0.01	Presence
SLM_MC1B_46-N06	4~6 cm	SAMN40274553	JBCKEP000000000	7870254	7443527	7442562	7442544	649909	1712028	68.917	76	183379	44773	0.536693	69.2523	0.540541	1872	0.911497	d__Bacteria;p__Actinobacteriota;c__Actinomycetia;o__Nanopelagicales;f__S36-B12;g__UBA4592;s__	2.47216e+06	d__Bacteria;p__Actinobacteriota;c__Actinomycetia;o__Nanopelagicales;f__S36-B12;g__UBA4592;s__	GCF_000331735.1	84.4954	0	Presence
SLM_MC1B_02-E16	0~2 cm	SAMN40274554	JBCKEQ000000000	9031908	8304670	8302288	8302205	875986	2259993	68.6756	64	285215	64319	0.540749	89.8777	1.08108	2434	0.911554	d__Bacteria;p__Actinobacteriota;c__Actinomycetia;o__Nanopelagicales;f__S36-B12;g__UBA4592;s__	2.51452e+06	d__Bacteria;p__Actinobacteriota;c__Actinomycetia;o__Nanopelagicales;f__S36-B12;g__UBA4592;s__	GCF_000418555.1	86.2407	0	Absence
SLM_MC1B_46-L03	4~6 cm	SAMN40274555	JBCKER000000000	7479271	7107294	7106131	7106128	556374	1509130	66.6151	82	131967	31471	0.53842	63.9768	0.540541	1646	0.908708	d__Bacteria;p__Actinobacteriota;c__Actinomycetia;o__Nanopelagicales;f__S36-B12;g__UBA4592;s__	2.35887e+06	d__Bacteria;p__Actinobacteriota;c__Actinomycetia;o__Nanopelagicales;f__S36-B12;g__UBA4592;s__	GCA_002150995.1	91.67	0.01	Presence
SLM_MC1B_46-J13	4~6 cm	SAMN40274556	JBCKES000000000	9155506	8701168	8699649	8699633	502838	1411991	63.7681	86	84848	30927	0.538013	53.4483	0	1554	0.912878	d__Bacteria;p__Actinobacteriota;c__Actinomycetia;o__Nanopelagicales;f__S36-B12;g__UBA4592;s__	2.64179e+06	d__Bacteria;p__Actinobacteriota;c__Actinomycetia;o__Nanopelagicales;f__S36-B12;g__UBA4592;s__	GCF_001646645.1	82.8743	0	Presence
SLM_LV1_BS-B20	BulkSediment	SAMN40274557	JBCKET000000000	9067406	8494879	8492956	8492691	377973	1324631	50.6206	79	84341	29245	0.53386	51.7246	1.08108	1380	0.915529	d__Bacteria;p__Actinobacteriota;c__Actinomycetia;o__Nanopelagicales;f__S36-B12;g__UBA4592;s__	2.56093e+06	d__Bacteria;p__Actinobacteriota;c__Actinomycetia;o__Nanopelagicales;f__S36-B12;g__UBA4592;s__	GCA_002365735.1	79.7778	0.39	Presence
SLM_MC1B_46-D02	4~6 cm	SAMN40274558	JBCKEU000000000	8879945	8319444	8318054	8318049	785265	1993138	71.2097	73	137472	53335	0.540666	83.9318	0	2170	0.905387	d__Bacteria;p__Actinobacteriota;c__Actinomycetia;o__Nanopelagicales;f__S36-B12;g__UBA4592;s__	2.37471e+06	d__Bacteria;p__Actinobacteriota;c__Actinomycetia;o__Nanopelagicales;f__S36-B12;g__UBA4592;s__	GCF_000418555.1	90.3563	0	Presence
SLM_MC1B_46-A11	4~6 cm	SAMN40274559	JBCKEV000000000	7170545	6732351	6730913	6730908	853639	2249592	68.2533	79	232100	52827	0.542533	81.9498	1.48649	2429	0.906758	d__Bacteria;p__Actinobacteriota;c__Actinomycetia;o__Nanopelagicales;f__S36-B12;g__UBA4592;s__	2.74509e+06	d__Bacteria;p__Actinobacteriota;c__Actinomycetia;o__Nanopelagicales;f__S36-B12;g__UBA4592;s__	GCF_016907085.1	84.4999	0.01	Presence
SLM_MC1B_02-F04	0~2 cm	SAMN40274560	JBCKEW000000000	8514908	8032376	8030954	8030951	793374	1979946	71.2124	70	187362	61579	0.540609	70.9138	1.08108	2090	0.907385	d__Bacteria;p__Actinobacteriota;c__Actinomycetia;o__Nanopelagicales;f__S36-B12;g__UBA4592;s__	2.79205e+06	d__Bacteria;p__Actinobacteriota;c__Actinomycetia;o__Nanopelagicales;f__S36-B12;g__UBA4592;s__	GCF_000502835.1	81.9104	0	Absence
SLM_MC1B_46-P17	4~6 cm	SAMN40274561	JBCKEX000000000	8501073	8029000	8027731	8027722	785955	2027561	69.7495	66	220587	51686	0.541814	77.4775	0.810811	2178	0.908862	d__Bacteria;p__Actinobacteriota;c__Actinomycetia;o__Nanopelagicales;f__S36-B12;g__UBA4592;s__	2.61697e+06	d__Bacteria;p__Actinobacteriota;c__Actinomycetia;o__Nanopelagicales;f__S36-B12;g__UBA4592;s__	GCF_001280205.1	87.316	0.01	Presence
SLM_MC1B_46-L16	4~6 cm	SAMN40274562	JBCKEY000000000	9530874	9042673	9041016	9041013	537892	1553548	62.7576	80	96592	34874	0.536493	61.6924	0.540541	1679	0.910211	d__Bacteria;p__Actinobacteriota;c__Actinomycetia;o__Nanopelagicales;f__S36-B12;g__UBA4592;s__	2.51822e+06	d__Bacteria;p__Actinobacteriota;c__Actinomycetia;o__Nanopelagicales;f__S36-B12;g__UBA4592;s__	GCA_905181745.1	79.7843	0.39	Absence
SLM_MC1B_46-I11	4~6 cm	SAMN40274563	JBCKEZ000000000	8420430	7945579	7943970	7943946	588960	1611199	64.1169	76	134284	36557	0.533284	74.2921	0.720721	1739	0.919842	d__Bacteria;p__Actinobacteriota;c__Actinomycetia;o__Nanopelagicales;f__S36-B12;g__UBA4592;s__	2.16873e+06	d__Bacteria;p__Actinobacteriota;c__Actinomycetia;o__Nanopelagicales;f__S36-B12;g__UBA4592;s__	GCA_905181745.1	79.7913	0.41	Absence
SLM_MC1B_02-B20	0~2 cm	SAMN40274564	JBCKFA000000000	7462534	6904577	6903365	6903341	500680	1645457	54.5414	73	175501	39119	0.53746	66.4994	0.540541	1780	0.9098	d__Bacteria;p__Actinobacteriota;c__Actinomycetia;o__Nanopelagicales;f__S36-B12;g__UBA4592;s__	2.4744e+06	d__Bacteria;p__Actinobacteriota;c__Actinomycetia;o__Nanopelagicales;f__S36-B12;g__UBA4592;s__	GCA_002365735.1	79.8372	0.41	Presence
SLM_MC1B_02-E21	0~2 cm	SAMN40274565	JBCKFB000000000	8330387	7691418	7689657	7689611	834514	2099874	70.4241	59	125122	62214	0.544417	82.3874	0.540541	2290	0.907666	d__Bacteria;p__Actinobacteriota;c__Actinomycetia;o__Nanopelagicales;f__S36-B12;g__UBA4592;s__	2.54878e+06	d__Bacteria;p__Actinobacteriota;c__Actinomycetia;o__Nanopelagicales;f__S36-B12;g__UBA4592;s__	GCA_905181745.1	79.7632	0.44	Absence
SLM_MC1B_46-O02	4~6 cm	SAMN40274566	JBCKFC000000000	7129683	6801532	6800355	6800346	727991	2016355	66.1187	58	154502	67893	0.539758	79.8134	0.540541	2160	0.907751	d__Bacteria;p__Actinobacteriota;c__Actinomycetia;o__Nanopelagicales;f__S36-B12;g__UBA4592;s__	2.52634e+06	d__Bacteria;p__Actinobacteriota;c__Actinomycetia;o__Nanopelagicales;f__S36-B12;g__UBA4592;s__	GCF_004362195.1	84.2117	0	Presence
SLM_MC1B_02-P20	0~2 cm	SAMN40274567	JBCKFD000000000	8022467	7628211	7627232	7626983	486904	1368073	63.4406	68	106634	32647	0.536993	58.5843	0	1497	0.912747	d__Bacteria;p__Actinobacteriota;c__Actinomycetia;o__Nanopelagicales;f__S36-B12;g__UBA4592;s__	2.33522e+06	d__Bacteria;p__Actinobacteriota;c__Actinomycetia;o__Nanopelagicales;f__S36-B12;g__UBA4592;s__	GCF_016907085.1	86.3422	0	Presence
SLM_MC1B_24-L21	2~4 cm	SAMN40274568	JBCKFE000000000	8950247	8399459	8397942	8397864	619321	1615921	68.6047	69	105015	48256	0.539854	64.2921	1.08108	1774	0.913254	d__Bacteria;p__Actinobacteriota;c__Actinomycetia;o__Nanopelagicales;f__S36-B12;g__UBA4592;s__	2.5134e+06	d__Bacteria;p__Actinobacteriota;c__Actinomycetia;o__Nanopelagicales;f__S36-B12;g__UBA4592;s__	GCA_905181745.1	79.9051	0.34	Absence
SLM_MC1B_46-M21	4~6 cm	SAMN40274569	JBCKFF000000000	10142375	9568250	9566589	9564997	626808	1633633	70.1431	77	117010	34590	0.538636	63.396	0.701754	1797	0.908991	d__Bacteria;p__Actinobacteriota;c__Actinomycetia;o__Nanopelagicales;f__S36-B12;g__UBA4592;s__	2.57687e+06	d__Bacteria;p__Actinobacteriota;c__Actinomycetia;o__Nanopelagicales;f__S36-B12;g__UBA4592;s__	GCF_016907085.1	83.5533	0.01	Presence
SLM_MC1B_46-K05	4~6 cm	SAMN40274570	JBCKFG000000000	10558243	10024745	10022995	10022986	731893	1818261	72.614	76	94877	45768	0.541091	74.2921	0.540541	2025	0.910407	d__Bacteria;p__Actinobacteriota;c__Actinomycetia;o__Nanopelagicales;f__S36-B12;g__UBA4592;s__	2.44745e+06	d__Bacteria;p__Actinobacteriota;c__Actinomycetia;o__Nanopelagicales;f__S36-B12;g__UBA4592;s__	GCF_014204835.1	84.5764	0.01	Presence
SLM_LV1_BS-K10	BulkSediment	SAMN40274571	JBCKFH000000000	6765674	6363992	6362984	6362961	244397	671332	65.0114	45	55561	30810	0.542919	22.1622	0	732	0.917266	d__Bacteria;p__Actinobacteriota;c__Actinomycetia;o__Nanopelagicales;f__S36-B12;g__UBA4592;s__	3.02918e+06	d__Bacteria;p__Actinobacteriota;c__Actinomycetia;o__Nanopelagicales;f__S36-B12;g__UBA4592;s__	GCA_905181745.1	80.2658	0.2	Absence
SLM_MC1B_46-L11	4~6 cm	SAMN40274572	JBCKFI000000000	6766548	6447416	6446277	6446271	318314	1099620	52.2096	69	77800	26200	0.540085	52.2989	0	1188	0.906772	d__Bacteria;p__Actinobacteriota;c__Actinomycetia;o__Nanopelagicales;f__S36-B12;g__UBA4592;s__	2.10257e+06	d__Bacteria;p__Actinobacteriota;c__Actinomycetia;o__Nanopelagicales;f__S36-B12;g__UBA4592;s__	GCF_015040615.1	81.5443	0.01	Presence
SLM_MC1B_02-F06	0~2 cm	SAMN40274573	JBCKFJ000000000	8013412	7539959	7538572	7538565	690619	1821066	67.3594	85	78997	51627	0.542432	68.5071	0.540541	1990	0.906958	d__Bacteria;p__Actinobacteriota;c__Actinomycetia;o__Nanopelagicales;f__S36-B12;g__UBA4592;s__	2.65822e+06	d__Bacteria;p__Actinobacteriota;c__Actinomycetia;o__Nanopelagicales;f__S36-B12;g__UBA4592;s__	GCA_013204985.1	82.8518	0	Presence
SLM_LV1_BS-G07	BulkSediment	SAMN40274574	JBCKFK000000000	7134026	6721764	6720740	6720738	807250	2063099	70.1861	106	80299	35033	0.53919	76.4543	1.08108	2238	0.911276	d__Bacteria;p__Actinobacteriota;c__Actinomycetia;o__Nanopelagicales;f__S36-B12;g__UBA4592;s__	2.69847e+06	d__Bacteria;p__Actinobacteriota;c__Actinomycetia;o__Nanopelagicales;f__S36-B12;g__UBA4592;s__	GCA_002365735.1	79.6872	0.42	Absence
SLM_LV1_BS-L07	BulkSediment	SAMN40274575	JBCKFL000000000	8221753	7646379	7643868	7643096	1066398	2659742	71.4339	85	180445	75792	0.549484	86.3192	1.8018	2807	0.907598	d__Bacteria;p__Actinobacteriota;c__Actinomycetia;o__Nanopelagicales;f__S36-B12;g__UBA4592;s__	3.08129e+06	d__Bacteria;p__Actinobacteriota;c__Actinomycetia;o__Nanopelagicales;f__S36-B12;g__UBA4592;s__	GCF_000021325.1	83.682	0	Absence
SLM_MC1B_46-O20	4~6 cm	SAMN40274576	JBCKFM000000000	8442820	7886041	7884638	7884597	771533	1965316	68.815	74	123982	52418	0.538998	82.4003	0.630631	2096	0.913335	d__Bacteria;p__Actinobacteriota;c__Actinomycetia;o__Nanopelagicales;f__S36-B12;g__UBA4592;s__	2.38508e+06	d__Bacteria;p__Actinobacteriota;c__Actinomycetia;o__Nanopelagicales;f__S36-B12;g__UBA4592;s__	GCF_004362195.1	84.7177	0	Presence
SLM_MC1B_46-G14	4~6 cm	SAMN40274577	JBCKFN000000000	8393487	7999201	7997395	7997382	582071	1761074	60.2494	62	149295	65253	0.538284	76.8468	0.810811	1900	0.915889	d__Bacteria;p__Actinobacteriota;c__Actinomycetia;o__Nanopelagicales;f__S36-B12;g__UBA4592;s__	2.29167e+06	d__Bacteria;p__Actinobacteriota;c__Actinomycetia;o__Nanopelagicales;f__S36-B12;g__UBA4592;s__	GCF_016907085.1	86.7827	0	Presence
SLM_MC1B_02-K13	0~2 cm	SAMN40274578	JBCKFO000000000	9479045	8865107	8861198	8861197	259184	849921	56.1391	93	87800	14272	0.595213	17.8443	0.0540541	874	0.894837	d__Bacteria;p__Actinobacteriota;c__Actinomycetia;o__Nanopelagicales;f__UBA10799;g__UBA10799;s__	4.76299e+06	d__Bacteria;p__Actinobacteriota;c__Actinomycetia;o__Nanopelagicales;f__UBA10799;g__UBA10799;s__	GCF_000241345.1	77.4461	0.03	Absence
SLM_MC1B_24-N17	2~4 cm	SAMN40274579	JBCKFP000000000	9384777	8816105	8812418	8812330	568369	1743771	56.1723	105	75877	30975	0.595882	56.8966	0	1785	0.902092	d__Bacteria;p__Actinobacteriota;c__Actinomycetia;o__Nanopelagicales;f__UBA10799;g__UBA10799;s__	3.06481e+06	d__Bacteria;p__Actinobacteriota;c__Actinomycetia;o__Nanopelagicales;f__UBA10799;g__UBA10799;s__	GCA_005774595.1	78.4376	0	Absence
SLM_MC1B_02-B23	0~2 cm	SAMN40274580	JBCKFQ000000000	8187716	7735471	7729917	7729906	469466	1305105	63.1409	82	146337	27453	0.594627	28.7356	0	1330	0.901099	d__Bacteria;p__Actinobacteriota;c__Actinomycetia;o__Nanopelagicales;f__UBA10799;g__UBA10799;s__	4.54177e+06	d__Bacteria;p__Actinobacteriota;c__Actinomycetia;o__Nanopelagicales;f__UBA10799;g__UBA10799;s__	GCF_014652915.1	78.5882	0	Absence
SLM_LV1_30a-A14	>3.0 um	SAMN40274581	JBCKFR000000000	8892295	8428062	8421454	8421439	703578	1751820	70.224	122	60687	22789	0.597979	42.2414	0	1833	0.902486	d__Bacteria;p__Actinobacteriota;c__Actinomycetia;o__Nanopelagicales;f__UBA10799;g__UBA10799;s__	4.14717e+06	d__Bacteria;p__Actinobacteriota;c__Actinomycetia;o__Nanopelagicales;f__UBA10799;g__UBA10799;s__	GCA_903868545.1	77.6199	0.01	Absence
SLM_MC1B_02-F09	0~2 cm	SAMN40274582	JBCKFS000000000	8163831	7672422	7668279	7668278	738181	1830946	70.0687	116	146109	31908	0.595474	65.3431	1.96078	1917	0.901728	d__Bacteria;p__Actinobacteriota;c__Actinomycetia;o__Nanopelagicales;f__UBA10799;g__UBA10799;s__	2.80205e+06	d__Bacteria;p__Actinobacteriota;c__Actinomycetia;o__Nanopelagicales;f__UBA10799;g__UBA10799;s__	GCA_902779675.1	84.8099	0.01	Presence
SLM_MC1B_24-P13	2~4 cm	SAMN40274583	JBCKFT000000000	11834889	11280272	11277110	11276973	419359	1146917	65.1802	67	108889	34245	0.59595	44.3137	0.784314	1204	0.900283	d__Bacteria;p__Actinobacteriota;c__Actinomycetia;o__Nanopelagicales;f__UBA10799;g__UBA10799;s__	2.58818e+06	d__Bacteria;p__Actinobacteriota;c__Actinomycetia;o__Nanopelagicales;f__UBA10799;g__UBA10799;s__	GCA_016215085.1	81.329	0.02	Absence
SLM_MC1B_02-G03	0~2 cm	SAMN40274584	JBCKFU000000000	9121950	8596102	8592091	8592089	413050	962814	74.0377	68	103084	21722	0.596512	8.33333	0	996	0.895699	d__Bacteria;p__Actinobacteriota;c__Actinomycetia;o__Nanopelagicales;f__UBA10799;g__UBA10799;s__	1.15538e+07	d__Bacteria;p__Actinobacteriota;c__Actinomycetia;o__Nanopelagicales;f__UBA10799;g__UBA10799;s__	GCA_014378035.1	76.996	0.02	Absence
SLM_MC1B_02-D18	0~2 cm	SAMN40274585	JBCKFV000000000	7033998	6600074	6597703	6597686	617852	1726066	62.6832	146	68565	17974	0.597197	60.9244	1.17647	1773	0.909193	d__Bacteria;p__Actinobacteriota;c__Actinomycetia;o__Nanopelagicales;f__UBA10799;g__UBA10799;s__	2.83313e+06	d__Bacteria;p__Actinobacteriota;c__Actinomycetia;o__Nanopelagicales;f__UBA10799;g__UBA10799;s__	GCF_003410055.1	77.2334	0	Absence
SLM_MC1B_02-A09	0~2 cm	SAMN40274586	JBCKFW000000000	13817483	13125824	13123271	13123197	125048	307200	64.7374	53	15684	6421	0.594909	8.62069	0	344	0.916855	d__Bacteria;p__Actinobacteriota;c__Actinomycetia;o__Nanopelagicales;f__UBA10799;g__UBA10799;s__	3.56352e+06	d__Bacteria;p__Actinobacteriota;c__Actinomycetia;o__Nanopelagicales;f__UBA10799;g__UBA10799;s__				Absence
SLM_MC1B_02-G14	0~2 cm	SAMN40274587	JBCKFX000000000	9865659	9372184	9364056	9364054	414996	1211811	60.1309	66	81933	33610	0.597381	42.1569	1.76471	1254	0.892419	d__Bacteria;p__Actinobacteriota;c__Actinomycetia;o__Nanopelagicales;f__UBA10799;g__UBA10799;s__	2.87453e+06	d__Bacteria;p__Actinobacteriota;c__Actinomycetia;o__Nanopelagicales;f__UBA10799;g__UBA10799;s__	GCF_016428905.1	85.0607	0	Presence
SLM_MC1B_02-E04	0~2 cm	SAMN40274588	JBCKFY000000000	7617498	7141004	7135137	7135132	749364	1946416	68.0511	107	89182	36395	0.596545	66.4543	1.62162	1904	0.904465	d__Bacteria;p__Actinobacteriota;c__Actinomycetia;o__Nanopelagicales;f__UBA10799;g__UBA10799;s__	2.92895e+06	d__Bacteria;p__Actinobacteriota;c__Actinomycetia;o__Nanopelagicales;f__UBA10799;g__UBA10799;s__	GCA_003166865.1	84.5169	0.01	Presence
SLM_MC1B_02-F21	0~2 cm	SAMN40274589	JBCKFZ000000000	8007462	7588966	7584955	7584951	711669	1847702	66.3229	122	104768	25919	0.59148	67.4118	1.17647	1868	0.896469	d__Bacteria;p__Actinobacteriota;c__Actinomycetia;o__Nanopelagicales;f__UBA10799;g__UBA10799;s__	2.74092e+06	d__Bacteria;p__Actinobacteriota;c__Actinomycetia;o__Nanopelagicales;f__UBA10799;g__UBA10799;s__	GCF_000418555.1	86.9516	0	Absence
SLM_MC1B_02-D02	0~2 cm	SAMN40274590	JBCKGA000000000	6724169	6245240	6236641	6236620	644701	1630051	68.7247	98	86022	27282	0.595228	63.7931	0	1655	0.900886	d__Bacteria;p__Actinobacteriota;c__Actinomycetia;o__Nanopelagicales;f__UBA10799;g__UBA10799;s__	2.55522e+06	d__Bacteria;p__Actinobacteriota;c__Actinomycetia;o__Nanopelagicales;f__UBA10799;g__UBA10799;s__	GCF_014174355.1	82.2401	0	Absence
SLM_MC1B_02-A17	0~2 cm	SAMN40274591	JBCKGB000000000	7192779	6695032	6686982	6686970	607691	1552627	69.4489	79	154120	36335	0.596121	63.1351	0.540541	1584	0.90419	d__Bacteria;p__Actinobacteriota;c__Actinomycetia;o__Nanopelagicales;f__UBA10799;g__UBA10799;s__	2.45921e+06	d__Bacteria;p__Actinobacteriota;c__Actinomycetia;o__Nanopelagicales;f__UBA10799;g__UBA10799;s__	GCF_004959935.1	83.3831	0	Presence
SLM_MC1B_02-I04	0~2 cm	SAMN40274592	JBCKGC000000000	7654386	7168817	7165914	7165905	454120	1161293	68.6466	57	91463	27716	0.596371	25	0	1163	0.897605	d__Bacteria;p__Actinobacteriota;c__Actinomycetia;o__Nanopelagicales;f__UBA10799;g__UBA10799;s__	4645172	d__Bacteria;p__Actinobacteriota;c__Actinomycetia;o__Nanopelagicales;f__UBA10799;g__UBA10799;s__	GCF_016807485.1	81.8098	0.02	Presence
SLM_MC1B_810-D11	8~10 cm	SAMN40274593	JBCKGD000000000	8771444	8128910	8116964	8116845	763968	1936574	63.3959	196	66022	14204	0.622137	48.9961	0	1975	0.896085	d__Bacteria;p__Actinobacteriota;c__Actinomycetia;o__Nanopelagicales;f__UBA10799;g__UBA10799;s__	3.9525e+06	d__Bacteria;p__Actinobacteriota;c__Actinomycetia;o__Nanopelagicales;f__UBA10799;g__UBA10799;s__	GCF_002795865.1	82.1882	0	Absence
SLM_MC1B_02-D03	0~2 cm	SAMN40274594	JBCKGE000000000	6718918	6188646	6183822	6183808	703744	1853382	63.4234	146	63706	20590	0.594559	67.7555	1.89189	1860	0.905027	d__Bacteria;p__Actinobacteriota;c__Actinomycetia;o__Nanopelagicales;f__UBA10799;g__;s__	2.7354e+06	d__Bacteria;p__Actinobacteriota;c__Actinomycetia;o__Nanopelagicales;f__UBA10799;g__;s__	GCA_001873295.1	84.5221	0.01	Presence
SLM_MC1B_46-A13	4~6 cm	SAMN40274595	JBCKGF000000000	9138690	8539604	8531251	8531242	717061	1749876	68.6186	154	58674	17195	0.594298	50	1.72414	1772	0.900716	d__Bacteria;p__Actinobacteriota;c__Actinomycetia;o__Nanopelagicales;f__UBA10799;g__;s__	3499752	d__Bacteria;p__Actinobacteriota;c__Actinomycetia;o__Nanopelagicales;f__UBA10799;g__;s__	GCA_017302495.1	78.4874	0	Absence
SLM_MC1B_68-M15	6~8 cm	SAMN40274596	JBCKGG000000000	8530119	8080771	8056436	8056431	500784	1243173	69.0673	108	48790	16815	0.595204	46.5517	0	1336	0.897273	d__Bacteria;p__Actinobacteriota;c__Actinomycetia;o__Nanopelagicales;f__UBA10799;g__;s__	2.67052e+06	d__Bacteria;p__Actinobacteriota;c__Actinomycetia;o__Nanopelagicales;f__UBA10799;g__;s__	GCF_003990725.2	77.1564	0	Absence
SLM_MC1B_46-K06	4~6 cm	SAMN40274597	JBCKGH000000000	10517207	10014018	10000492	10000476	408532	1009942	71.1809	85	67614	22390	0.593716	28.4483	0	1061	0.889968	d__Bacteria;p__Actinobacteriota;c__Actinomycetia;o__Nanopelagicales;f__UBA10799;g__;s__	3.5501e+06	d__Bacteria;p__Actinobacteriota;c__Actinomycetia;o__Nanopelagicales;f__UBA10799;g__;s__	GCF_004364555.1	91.8496	0	Absence
SLM_MC1B_68-C23	6~8 cm	SAMN40274598	JBCKGI000000000	9502480	8935509	8929666	8929652	691319	1770897	68.714	96	89264	32699	0.595379	67.8237	1.35135	1830	0.900069	d__Bacteria;p__Actinobacteriota;c__Actinomycetia;o__Nanopelagicales;f__UBA10799;g__;s__	2.61103e+06	d__Bacteria;p__Actinobacteriota;c__Actinomycetia;o__Nanopelagicales;f__UBA10799;g__;s__	GCF_000466165.1	83.9159	0	Absence
SLM_MC1B_46-M04	4~6 cm	SAMN40274599	JBCKGJ000000000	7574683	7219723	7215755	7215747	541124	1462916	64.6014	124	71949	18285	0.592733	54.6834	1.08108	1495	0.898858	d__Bacteria;p__Actinobacteriota;c__Actinomycetia;o__Nanopelagicales;f__UBA10799;g__;s__	2.67525e+06	d__Bacteria;p__Actinobacteriota;c__Actinomycetia;o__Nanopelagicales;f__UBA10799;g__;s__	GCF_014595995.2	86.5392	0.02	Presence
SLM_MC1B_02-K03	0~2 cm	SAMN40274600	JBCKGK000000000	6759208	6404222	6401041	6401040	336099	886182	64.413	69	51119	22617	0.59286	25.3922	0.588235	901	0.902697	d__Bacteria;p__Actinobacteriota;c__Actinomycetia;o__Nanopelagicales;f__UBA10799;g__;s__	3.48998e+06	d__Bacteria;p__Actinobacteriota;c__Actinomycetia;o__Nanopelagicales;f__UBA10799;g__;s__	GCF_013359685.1	84.9419	0.02	Presence
SLM_MC1B_46-G19	4~6 cm	SAMN40274601	JBCKGL000000000	7751921	7363544	7353696	7353694	437259	1441804	50.8932	141	86604	18045	0.593834	54.2471	0.540541	1528	0.903601	d__Bacteria;p__Actinobacteriota;c__Actinomycetia;o__Nanopelagicales;f__UBA10799;g__;s__	2.65785e+06	d__Bacteria;p__Actinobacteriota;c__Actinomycetia;o__Nanopelagicales;f__UBA10799;g__;s__	GCA_004366215.1	81.2507	0	Absence
SLM_MC1B_46-D20	4~6 cm	SAMN40274602	JBCKGM000000000	8681256	8153579	8148084	8148081	182726	478546	65.5213	42	50755	26676	0.595255	4.16667	0	542	0.870278	d__Bacteria;p__Actinobacteriota;c__Actinomycetia;o__Nanopelagicales;f__UBA10799;g__;s__	1.14851e+07	d__Bacteria;p__Actinobacteriota;c__Actinomycetia;o__Nanopelagicales;f__UBA10799;g__;s__				Absence
SLM_MC1B_46-A09	4~6 cm	SAMN40274603	JBCKGN000000000	19219585	18135815	18061170	18061166	449975	1291785	59.5533	112	60509	22085	0.594923	45.3925	0	1345	0.897765	d__Bacteria;p__Actinobacteriota;c__Actinomycetia;o__Nanopelagicales;f__UBA10799;g__;s__	2.84581e+06	d__Bacteria;p__Actinobacteriota;c__Actinomycetia;o__Nanopelagicales;f__UBA10799;g__;s__	GCA_003231035.1	78.6392	0	Absence
SLM_LV1_02b-C04	<0.2 um	SAMN40274604	JBCKGO000000000	11609926	10905462	10904447	10904421	457799	1147125	70.4092	62	90859	39813	0.477991	63.7606	0.540541	1162	0.932436	d__Bacteria;p__Actinobacteriota;c__Actinomycetia;o__Nanopelagicales;f__UBA5976;g__UBA5976;s__	1.79911e+06	d__Bacteria;p__Actinobacteriota;c__Actinomycetia;o__Nanopelagicales;f__UBA5976;g__UBA5976;s__	GCA_002430405.1	79.4909	0.43	Absence
SLM_LV1_0208-O05	0.2~0.8 um	SAMN40274605	JBCKGP000000000	8001544	7472416	7471736	7471687	116075	264848	79.4281	14	95615	48925	0.48711	17.2414	0	282	0.916647	d__Bacteria;p__Actinobacteriota;c__Actinomycetia;o__Nanopelagicales;f__UBA5976;g__UBA5976;s__	1.53612e+06	d__Bacteria;p__Actinobacteriota;c__Actinomycetia;o__Nanopelagicales;f__UBA5976;g__UBA5976;s__	GCA_009698575.1	80.4851	0.44	Presence
SLM_LV1_30a-N03	>3.0 um	SAMN40274606	JBCKGQ000000000	10150125	9618745	9609924	9609898	427251	1005424	74.8901	61	80571	24470	0.445785	29.3103	0	1048	0.938925	d__Bacteria;p__Actinobacteriota;c__Actinomycetia;o__Nanopelagicales;f__Nanopelagicaceae;g__Planktophila;s__	3.43027e+06	d__Bacteria;p__Actinobacteriota;c__Actinomycetia;o__Nanopelagicales;f__Nanopelagicaceae;g__Planktophila;s__	GCA_000378885.1	78.0255	0.16	Presence
SLM_LV1_02b-M17	<0.2 um	SAMN40274607	JBCKGR000000000	9162921	8551872	8548630	8548619	276487	650644	74.5459	55	59566	21514	0.447092	36.6667	1.53153	712	0.933716	d__Bacteria;p__Actinobacteriota;c__Actinomycetia;o__Nanopelagicales;f__Nanopelagicaceae;g__Planktophila;s__	1.77448e+06	d__Bacteria;p__Actinobacteriota;c__Actinomycetia;o__Nanopelagicales;f__Nanopelagicaceae;g__Planktophila;s__	GCA_015660815.1	79.7594	0.13	Presence
SLM_LV1_30a-N11	>3.0 um	SAMN40274608	JBCKGS000000000	8514177	8068988	8068303	8068185	126146	300890	73.925	29	40309	14522	0.446289	18.1034	0	337	0.950547	d__Bacteria;p__Actinobacteriota;c__Actinomycetia;o__Nanopelagicales;f__Nanopelagicaceae;g__Planktophila;s__	1.66206e+06	d__Bacteria;p__Actinobacteriota;c__Actinomycetia;o__Nanopelagicales;f__Nanopelagicaceae;g__Planktophila;s__				Absence
SLM_LV1_02b-D21	<0.2 um	SAMN40274609	JBCKGT000000000	10234276	9668214	9667435	9667400	172818	520186	57.0959	55	32257	13172	0.443887	37.6654	0	589	0.949568	d__Bacteria;p__Actinobacteriota;c__Actinomycetia;o__Nanopelagicales;f__Nanopelagicaceae;g__Planktophila;s__	1.38107e+06	d__Bacteria;p__Actinobacteriota;c__Actinomycetia;o__Nanopelagicales;f__Nanopelagicaceae;g__Planktophila;s__	GCA_018970885.1	78.6661	0.12	Absence
SLM_LV1_02b-E17	<0.2 um	SAMN40274610	JBCKGU000000000	9203618	8665767	8662878	8662823	177193	409732	71.7209	56	20770	11004	0.446553	23.2843	0.588235	469	0.926249	d__Bacteria;p__Actinobacteriota;c__Actinomycetia;o__Nanopelagicales;f__Nanopelagicaceae;g__Planktophila;s__	1.75969e+06	d__Bacteria;p__Actinobacteriota;c__Actinomycetia;o__Nanopelagicales;f__Nanopelagicaceae;g__Planktophila;s__	GCA_903918325.1	79.687	0.18	Absence
SLM_LV1_30a-J09	>3.0 um	SAMN40274611	JBCKGV000000000	10613324	10001013	10000049	10000046	299511	711386	71.9845	55	66038	18602	0.444879	40.8289	0	769	0.941427	d__Bacteria;p__Actinobacteriota;c__Actinomycetia;o__Nanopelagicales;f__Nanopelagicaceae;g__Planktophila;s__	1.74236e+06	d__Bacteria;p__Actinobacteriota;c__Actinomycetia;o__Nanopelagicales;f__Nanopelagicaceae;g__Planktophila;s__	GCA_014190015.1	78.2527	0.17	Absence
SLM_MC1B_24-G16	2~4 cm	SAMN40274612	JBCKGW000000000	7988276	7526560	7525252	7525179	471428	1128744	74.3491	46	264036	51222	0.450428	53.4804	0.784314	1128	0.931421	d__Bacteria;p__Actinobacteriota;c__Actinomycetia;o__Nanopelagicales;f__Nanopelagicaceae;g__Planktophila;s__	2.11058e+06	d__Bacteria;p__Actinobacteriota;c__Actinomycetia;o__Nanopelagicales;f__Nanopelagicaceae;g__Planktophila;s__	GCA_002256935.1	79.9073	0.01	Presence
SLM_LV1_02b-K21	<0.2 um	SAMN40274613	JBCKGX000000000	10738608	10063012	10036845	10036828	235617	643357	64.4311	54	53088	17417	0.44996	37.8917	0	680	0.935192	d__Bacteria;p__Actinobacteriota;c__Actinomycetia;o__Nanopelagicales;f__Nanopelagicaceae;g__Planktophila;s__	1.69788e+06	d__Bacteria;p__Actinobacteriota;c__Actinomycetia;o__Nanopelagicales;f__Nanopelagicaceae;g__Planktophila;s__	GCA_014190015.1	78.2407	0.16	Absence
SLM_LV1_0208-E14	0.2~0.8 um	SAMN40274614	JBCKGY000000000	7402653	6908173	6907516	6907499	281472	750975	66.3674	54	63431	25873	0.449818	36.175	0	803	0.935721	d__Bacteria;p__Actinobacteriota;c__Actinomycetia;o__Nanopelagicales;f__Nanopelagicaceae;g__Planktophila;s__	2.07595e+06	d__Bacteria;p__Actinobacteriota;c__Actinomycetia;o__Nanopelagicales;f__Nanopelagicaceae;g__Planktophila;s__	GCA_003569185.1	80.6072	0.06	Presence
SLM_LV1_02b-F16	<0.2 um	SAMN40274615	JBCKGZ000000000	8902961	8416272	8415342	8415342	211247	530299	71.1713	44	66799	18139	0.447566	31.3922	0.588235	549	0.929645	d__Bacteria;p__Actinobacteriota;c__Actinomycetia;o__Nanopelagicales;f__Nanopelagicaceae;g__Planktophila;s__	1.68927e+06	d__Bacteria;p__Actinobacteriota;c__Actinomycetia;o__Nanopelagicales;f__Nanopelagicaceae;g__Planktophila;s__	GCA_000372185.1	80.2744	0.15	Presence
SLM_LV1_02b-A23	<0.2 um	SAMN40274616	JBCKHA000000000	8479735	7883924	7883008	7882982	190900	454135	72.5399	48	28858	13585	0.450406	31.3734	0	502	0.93716	d__Bacteria;p__Actinobacteriota;c__Actinomycetia;o__Nanopelagicales;f__Nanopelagicaceae;g__Planktophila;s__	1.44751e+06	d__Bacteria;p__Actinobacteriota;c__Actinomycetia;o__Nanopelagicales;f__Nanopelagicaceae;g__Planktophila;s__	GCA_000372185.1	81.3594	0.15	Presence
SLM_LV1_0830-A05	0.8~3.0 um	SAMN40274617	JBCKHB000000000	7952904	7475120	7473213	7473106	376120	1015343	66.4636	43	125528	50253	0.446191	61.8697	0	1049	0.93184	d__Bacteria;p__Actinobacteriota;c__Actinomycetia;o__Nanopelagicales;f__Nanopelagicaceae;g__Planktophila;s__	1.6411e+06	d__Bacteria;p__Actinobacteriota;c__Actinomycetia;o__Nanopelagicales;f__Nanopelagicaceae;g__Planktophila;s__	GCF_003385895.1	81.1223	0	Presence
SLM_LV1_30a-I21	>3.0 um	SAMN40274618	JBCKHC000000000	7279902	6839747	6838747	6838745	356487	948304	66.2131	51	142344	27721	0.445797	49.6075	0	988	0.938042	d__Bacteria;p__Actinobacteriota;c__Actinomycetia;o__Nanopelagicales;f__Nanopelagicaceae;g__Planktophila;s__	1.91162e+06	d__Bacteria;p__Actinobacteriota;c__Actinomycetia;o__Nanopelagicales;f__Nanopelagicaceae;g__Planktophila;s__	GCA_014190015.1	79.072	0.17	Absence
SLM_LV1_02b-A22	<0.2 um	SAMN40274619	JBCKHD000000000	7447291	7059115	7058403	7058329	272425	743541	64.6348	52	74231	21198	0.444894	47.0849	0	795	0.943594	d__Bacteria;p__Actinobacteriota;c__Actinomycetia;o__Nanopelagicales;f__Nanopelagicaceae;g__Planktophila;s__	1.57915e+06	d__Bacteria;p__Actinobacteriota;c__Actinomycetia;o__Nanopelagicales;f__Nanopelagicaceae;g__Planktophila;s__	GCA_010032875.1	78.4144	0.17	Absence
SLM_LV1_02b-J06	<0.2 um	SAMN40274620	JBCKHE000000000	9720678	9094761	9093427	9093402	109051	257890	67.7988	45	13839	7264	0.44638	12.3616	0	298	0.955089	d__Bacteria;p__Actinobacteriota;c__Actinomycetia;o__Nanopelagicales;f__Nanopelagicaceae;g__Planktophila;s__	2.08621e+06	d__Bacteria;p__Actinobacteriota;c__Actinomycetia;o__Nanopelagicales;f__Nanopelagicaceae;g__Planktophila;s__	GCF_002288185.1	77.774	0.25	Absence
SLM_LV1_0208-O13	0.2~0.8 um	SAMN40274621	JBCKHF000000000	7617884	7179845	7179114	7179070	170488	482609	62.9046	39	73657	18275	0.445883	29.1253	0.131579	512	0.953656	d__Bacteria;p__Actinobacteriota;c__Actinomycetia;o__Nanopelagicales;f__Nanopelagicaceae;g__Planktophila;s__	1.65701e+06	d__Bacteria;p__Actinobacteriota;c__Actinomycetia;o__Nanopelagicales;f__Nanopelagicaceae;g__Planktophila;s__	GCF_002288365.1	78.3133	0.24	Absence
SLM_LV1_0830-C08	0.8~3.0 um	SAMN40274622	JBCKHG000000000	7886107	7308589	7308000	7306067	127816	353941	61.7578	49	21648	9606	0.448614	20.2763	0.534759	386	0.947861	d__Bacteria;p__Actinobacteriota;c__Actinomycetia;o__Nanopelagicales;f__Nanopelagicaceae;g__Planktophila;s__	1.74559e+06	d__Bacteria;p__Actinobacteriota;c__Actinomycetia;o__Nanopelagicales;f__Nanopelagicaceae;g__Planktophila;s__				Absence
SLM_LV1_0830-A03	0.8~3.0 um	SAMN40274623	JBCKHH000000000	9311386	8787451	8785428	8785368	84326	212377	65.0944	35	19110	8582	0.447341	17.2414	0	247	0.944777	d__Bacteria;p__Actinobacteriota;c__Actinomycetia;o__Nanopelagicales;f__Nanopelagicaceae;g__Planktophila;s__	1.23179e+06	d__Bacteria;p__Actinobacteriota;c__Actinomycetia;o__Nanopelagicales;f__Nanopelagicaceae;g__Planktophila;s__				Absence
SLM_LV1_02b-I14	<0.2 um	SAMN40274624	JBCKHI000000000	7991894	7588801	7588201	7588196	212525	554249	66.84	75	28156	9802	0.447817	27.3511	0	602	0.937755	d__Bacteria;p__Actinobacteriota;c__Actinomycetia;o__Nanopelagicales;f__Nanopelagicaceae;g__Planktophila;s__	2.02642e+06	d__Bacteria;p__Actinobacteriota;c__Actinomycetia;o__Nanopelagicales;f__Nanopelagicaceae;g__Planktophila;s__	GCA_903932885.1	77.9788	0.14	Absence
SLM_LV1_0208-I22	0.2~0.8 um	SAMN40274625	JBCKHJ000000000	7940033	7440343	7439163	7439151	347578	934422	67.6839	48	125798	30908	0.448861	56.9356	1.08108	985	0.937164	d__Bacteria;p__Actinobacteriota;c__Actinomycetia;o__Nanopelagicales;f__Nanopelagicaceae;g__Planktophila;s__	1.64119e+06	d__Bacteria;p__Actinobacteriota;c__Actinomycetia;o__Nanopelagicales;f__Nanopelagicaceae;g__Planktophila;s__	GCF_002288365.1	78.1301	0.24	Absence
SLM_LV1_0208-G15	0.2~0.8 um	SAMN40274626	JBCKHK000000000	8162744	7728418	7724127	7724103	280790	702600	72.1062	48	54441	25888	0.444446	51.7157	0.882353	741	0.948743	d__Bacteria;p__Actinobacteriota;c__Actinomycetia;o__Nanopelagicales;f__Nanopelagicaceae;g__Planktophila;s__	1.35858e+06	d__Bacteria;p__Actinobacteriota;c__Actinomycetia;o__Nanopelagicales;f__Nanopelagicaceae;g__Planktophila;s__	GCA_015660815.1	78.6423	0.18	Presence
SLM_LV1_0830-E16	0.8~3.0 um	SAMN40274627	JBCKHL000000000	9878302	9240017	9239310	9239252	68475	204689	57.2417	29	26890	8834	0.449604	16.5985	0	226	0.927334	d__Bacteria;p__Actinobacteriota;c__Actinomycetia;o__Nanopelagicales;f__Nanopelagicaceae;g__Planktophila;s__	1.23318e+06	d__Bacteria;p__Actinobacteriota;c__Actinomycetia;o__Nanopelagicales;f__Nanopelagicaceae;g__Planktophila;s__	GCF_002288185.1	80.476	0.23	Absence
SLM_LV1_30a-J10	>3.0 um	SAMN40274628	JBCKHM000000000	8768925	8194038	8193185	8193179	159229	460901	57.6313	59	27897	10890	0.466315	27.5862	0	503	0.938384	d__Bacteria;p__Actinobacteriota;c__Actinomycetia;o__Nanopelagicales;f__Nanopelagicaceae;g__Planktophila;s__	1.67077e+06	d__Bacteria;p__Actinobacteriota;c__Actinomycetia;o__Nanopelagicales;f__Nanopelagicaceae;g__Planktophila;s__				Absence
SLM_LV1_0830-N21	0.8~3.0 um	SAMN40274629	JBCKHN000000000	6944031	6508872	6507832	6507824	421679	1138402	66.1475	49	113441	46872	0.469313	78.0702	0	1168	0.932631	d__Bacteria;p__Actinobacteriota;c__Actinomycetia;o__Nanopelagicales;f__Nanopelagicaceae;g__Planktophila;s__	1.45818e+06	d__Bacteria;p__Actinobacteriota;c__Actinomycetia;o__Nanopelagicales;f__Nanopelagicaceae;g__Planktophila;s__	GCA_000372185.1	79.5363	0.11	Presence
SLM_LV1_0830-L10	0.8~3.0 um	SAMN40274630	JBCKHO000000000	7832638	7362899	7361905	7361900	367208	918161	70.9132	52	57799	28579	0.467257	59.6396	0	931	0.937451	d__Bacteria;p__Actinobacteriota;c__Actinomycetia;o__Nanopelagicales;f__Nanopelagicaceae;g__Planktophila;s__	1.53951e+06	d__Bacteria;p__Actinobacteriota;c__Actinomycetia;o__Nanopelagicales;f__Nanopelagicaceae;g__Planktophila;s__	GCA_014190015.1	79.1722	0.14	Absence
SLM_LV1_0830-E05	0.8~3.0 um	SAMN40274631	JBCKHP000000000	10934808	10254818	10252233	10251888	263967	626011	68.533	60	56161	16036	0.48103	29.6569	0.196078	696	0.902839	d__Bacteria;p__Actinobacteriota;c__Actinomycetia;o__Nanopelagicales;f__Nanopelagicaceae;g__Planktophila;s__	2.11085e+06	d__Bacteria;p__Actinobacteriota;c__Actinomycetia;o__Nanopelagicales;f__Nanopelagicaceae;g__Planktophila;s__	GCF_002288365.1	78.9042	0.16	Absence
SLM_LV1_0208-D10	0.2~0.8 um	SAMN40274632	JBCKHQ000000000	7941242	7484139	7483418	7483395	135954	339095	68.8021	44	39811	9393	0.463466	17.7429	0	388	0.934989	d__Bacteria;p__Actinobacteriota;c__Actinomycetia;o__Nanopelagicales;f__Nanopelagicaceae;g__Planktophila;s__	1.91115e+06	d__Bacteria;p__Actinobacteriota;c__Actinomycetia;o__Nanopelagicales;f__Nanopelagicaceae;g__Planktophila;s__				Absence
SLM_LV1_0830-K19	0.8~3.0 um	SAMN40274633	JBCKHR000000000	8497813	7952052	7950623	7950619	418405	1090278	68.8197	54	99464	40518	0.466145	64.8371	0	1164	0.923331	d__Bacteria;p__Actinobacteriota;c__Actinomycetia;o__Nanopelagicales;f__Nanopelagicaceae;g__Planktophila;s__	1.68157e+06	d__Bacteria;p__Actinobacteriota;c__Actinomycetia;o__Nanopelagicales;f__Nanopelagicaceae;g__Planktophila;s__	GCA_003569185.1	79.9116	0.07	Presence
SLM_LV1_30a-L19	>3.0 um	SAMN40274634	JBCKHS000000000	9197627	8620186	8613627	8613622	216186	573209	64.9354	54	50486	12919	0.458458	8.33333	0	614	0.933323	d__Bacteria;p__Actinobacteriota;c__Actinomycetia;o__Nanopelagicales;f__Nanopelagicaceae;g__Planktophila;s__	6.87851e+06	d__Bacteria;p__Actinobacteriota;c__Actinomycetia;o__Nanopelagicales;f__Nanopelagicaceae;g__Planktophila;s__	GCA_002284895.1	77.6153	0.19	Presence
SLM_LV1_02b-G22	<0.2 um	SAMN40274635	JBCKHT000000000	7347733	6898470	6897527	6897526	375319	896942	73.0224	53	74491	33773	0.465156	50.8621	0	955	0.934568	d__Bacteria;p__Actinobacteriota;c__Actinomycetia;o__Nanopelagicales;f__Nanopelagicaceae;g__Planktophila;s__	1.76348e+06	d__Bacteria;p__Actinobacteriota;c__Actinomycetia;o__Nanopelagicales;f__Nanopelagicaceae;g__Planktophila;s__	GCA_002284895.1	77.2709	0.17	Absence
SLM_LV1_0208-E11	0.2~0.8 um	SAMN40274636	JBCKHU000000000	7512995	6961697	6960952	6960942	352273	934047	67.6162	43	87475	31644	0.463195	49.3784	0	976	0.935059	d__Bacteria;p__Actinobacteriota;c__Actinomycetia;o__Nanopelagicales;f__Nanopelagicaceae;g__Planktophila;s__	1.89161e+06	d__Bacteria;p__Actinobacteriota;c__Actinomycetia;o__Nanopelagicales;f__Nanopelagicaceae;g__Planktophila;s__	GCF_002288065.1	77.8325	0.12	Absence
SLM_LV1_0830-G08	0.8~3.0 um	SAMN40274637	JBCKHV000000000	10185566	9437150	9429196	9429056	99250	239319	67.585	48	14539	6313	0.460126	18.0878	0	278	0.930758	d__Bacteria;p__Actinobacteriota;c__Actinomycetia;o__Nanopelagicales;f__Nanopelagicaceae;g__Planktophila;s__	1.3231e+06	d__Bacteria;p__Actinobacteriota;c__Actinomycetia;o__Nanopelagicales;f__Nanopelagicaceae;g__Planktophila;s__				Absence
SLM_LV1_0830-J18	0.8~3.0 um	SAMN40274638	JBCKHW000000000	7817018	7174699	7173066	7173011	192394	503007	65.0814	67	21732	9851	0.46861	26.7241	0	544	0.943822	d__Bacteria;p__Actinobacteriota;c__Actinomycetia;o__Nanopelagicales;f__Nanopelagicaceae;g__Planktophila;s__	1.88222e+06	d__Bacteria;p__Actinobacteriota;c__Actinomycetia;o__Nanopelagicales;f__Nanopelagicaceae;g__Planktophila;s__				Absence
SLM_LV1_0830-O09	0.8~3.0 um	SAMN40274639	JBCKHX000000000	8328086	7847630	7846584	7846576	197173	481947	68.8737	64	32992	9601	0.470431	31.5789	0	527	0.938896	d__Bacteria;p__Actinobacteriota;c__Actinomycetia;o__Nanopelagicales;f__Nanopelagicaceae;g__Planktophila;s__	1.52617e+06	d__Bacteria;p__Actinobacteriota;c__Actinomycetia;o__Nanopelagicales;f__Nanopelagicaceae;g__Planktophila;s__				Absence
SLM_LV1_0208-B08	0.2~0.8 um	SAMN40274640	JBCKHY000000000	8930574	8396902	8396010	8395992	300420	785938	69.1655	39	61454	42103	0.469398	32.7586	0	782	0.938141	d__Bacteria;p__Actinobacteriota;c__Actinomycetia;o__Nanopelagicales;f__Nanopelagicaceae;g__Planktophila;s__	2.39918e+06	d__Bacteria;p__Actinobacteriota;c__Actinomycetia;o__Nanopelagicales;f__Nanopelagicaceae;g__Planktophila;s__	GCA_002284895.1	77.0992	0.17	Absence
SLM_LV1_0830-D08	0.8~3.0 um	SAMN40274641	JBCKHZ000000000	10366861	9801634	9800697	9800672	174635	436776	72.7861	21	112360	33253	0.47232	21.4414	0	436	0.940336	d__Bacteria;p__Actinobacteriota;c__Actinomycetia;o__Nanopelagicales;f__Nanopelagicaceae;g__Planktophila;s__	2.03706e+06	d__Bacteria;p__Actinobacteriota;c__Actinomycetia;o__Nanopelagicales;f__Nanopelagicaceae;g__Planktophila;s__	GCF_002288185.1	78.7003	0.19	Absence
SLM_LV1_0208-L06	0.2~0.8 um	SAMN40274642	JBCKIA000000000	7138349	6703794	6702785	6702757	300964	748711	71.1747	50	56181	29424	0.469105	27.5862	0	770	0.920855	d__Bacteria;p__Actinobacteriota;c__Actinomycetia;o__Nanopelagicales;f__Nanopelagicaceae;g__Planktophila;s__	2.71408e+06	d__Bacteria;p__Actinobacteriota;c__Actinomycetia;o__Nanopelagicales;f__Nanopelagicaceae;g__Planktophila;s__	GCA_000372185.1	78.5539	0.08	Presence
SLM_LV1_30a-O20	>3.0 um	SAMN40274643	JBCKIB000000000	8660267	8188252	8186549	8186536	344512	939236	64.9007	48	85346	29556	0.469084	48.2883	0	991	0.924369	d__Bacteria;p__Actinobacteriota;c__Actinomycetia;o__Nanopelagicales;f__Nanopelagicaceae;g__Planktophila;s__	1.94506e+06	d__Bacteria;p__Actinobacteriota;c__Actinomycetia;o__Nanopelagicales;f__Nanopelagicaceae;g__Planktophila;s__	GCA_003569265.1	80.4126	0.07	Presence
SLM_LV1_0830-I16	0.8~3.0 um	SAMN40274644	JBCKIC000000000	9057044	8492046	8487911	8487895	266778	690697	67.1696	65	48695	13985	0.46965	33.0915	0.526316	736	0.928656	d__Bacteria;p__Actinobacteriota;c__Actinomycetia;o__Nanopelagicales;f__Nanopelagicaceae;g__Planktophila;s__	2.08724e+06	d__Bacteria;p__Actinobacteriota;c__Actinomycetia;o__Nanopelagicales;f__Nanopelagicaceae;g__Planktophila;s__	GCF_002288185.1	78.6203	0.17	Absence
SLM_MC1B_24-A04	2~4 cm	SAMN40274645	JBCKID000000000	8592028	8075764	8074499	8074395	312826	803946	71.3067	49	88225	30178	0.47362	27.5862	1.72414	830	0.930805	d__Bacteria;p__Actinobacteriota;c__Actinomycetia;o__Nanopelagicales;f__Nanopelagicaceae;g__Planktophila;s__	2.9143e+06	d__Bacteria;p__Actinobacteriota;c__Actinomycetia;o__Nanopelagicales;f__Nanopelagicaceae;g__Planktophila;s__	GCA_903918325.1	77.8779	0.1	Absence
SLM_LV1_02b-O21	<0.2 um	SAMN40274646	JBCKIE000000000	7268054	6848515	6847519	6847493	261143	788114	58.5733	58	58974	18386	0.459894	36.297	0	846	0.939766	d__Bacteria;p__Actinobacteriota;c__Actinomycetia;o__Nanopelagicales;f__Nanopelagicaceae;g__;s__	2.17129e+06	d__Bacteria;p__Actinobacteriota;c__Actinomycetia;o__Nanopelagicales;f__Nanopelagicaceae;g__;s__	GCA_903878415.1	77.4219	0.13	Absence
SLM_LV1_0208-F23	0.2~0.8 um	SAMN40274647	JBCKIF000000000	7917179	7444762	7443885	7443864	249693	651232	69.2124	41	99413	23597	0.458205	30.964	0.540541	681	0.927358	d__Bacteria;p__Actinobacteriota;c__Actinomycetia;o__Nanopelagicales;f__Nanopelagicaceae;g__UBA7398;s__	2.10319e+06	d__Bacteria;p__Actinobacteriota;c__Actinomycetia;o__Nanopelagicales;f__Nanopelagicaceae;g__;s__				Presence
SLM_LV1_0830-I21	0.8~3.0 um	SAMN40274648	JBCKIG000000000	9095449	8567733	8566843	8566839	108700	254767	67.581	47	15760	5814	0.455432	11.86	0	302	0.947909	d__Bacteria;p__Actinobacteriota;c__Actinomycetia;o__Nanopelagicales;f__Nanopelagicaceae;g__;s__	2.14812e+06	d__Bacteria;p__Actinobacteriota;c__Actinomycetia;o__Nanopelagicales;f__Nanopelagicaceae;g__;s__				Absence
SLM_LV1_0830-D05	0.8~3.0 um	SAMN40274649	JBCKIH000000000	8098904	7528221	7525960	7525224	116530	272200	66.0585	43	19050	8472	0.458946	17.9459	0.540541	307	0.93281	d__Bacteria;p__Actinobacteriota;c__Actinomycetia;o__Nanopelagicales;f__Nanopelagicaceae;g__UBA7398;s__	1.51678e+06	d__Bacteria;p__Actinobacteriota;c__Actinomycetia;o__Nanopelagicales;f__Nanopelagicaceae;g__;s__				Absence
SLM_LV1_02b-I22	<0.2 um	SAMN40274650	JBCKII000000000	8976584	8447190	8445508	8445497	164856	451256	63.2816	52	33052	11401	0.463392	25.4079	0	531	0.924163	d__Bacteria;p__Actinobacteriota;c__Actinomycetia;o__Nanopelagicales;f__Nanopelagicaceae;g__;s__	1.77604e+06	d__Bacteria;p__Actinobacteriota;c__Actinomycetia;o__Nanopelagicales;f__Nanopelagicaceae;g__;s__				Absence
SLM_LV1_BS-D20	BulkSediment	SAMN40274651	JBCKIJ000000000	7979807	7410331	7406652	7406596	268439	754965	62.3976	42	146133	30220	0.457128	30.1724	0	798	0.932186	d__Bacteria;p__Actinobacteriota;c__Actinomycetia;o__Nanopelagicales;f__Nanopelagicaceae;g__;s__	2.50217e+06	d__Bacteria;p__Actinobacteriota;c__Actinomycetia;o__Nanopelagicales;f__Nanopelagicaceae;g__;s__	GCA_903878415.1	77.4489	0.11	Absence
SLM_LV1_0830-N20	0.8~3.0 um	SAMN40274652	JBCKIK000000000	8099569	7680000	7676954	7676942	199303	530222	63.6981	61	24197	12957	0.459924	32.6579	0	557	0.928068	d__Bacteria;p__Actinobacteriota;c__Actinomycetia;o__Nanopelagicales;f__Nanopelagicaceae;g__;s__	1.62356e+06	d__Bacteria;p__Actinobacteriota;c__Actinomycetia;o__Nanopelagicales;f__Nanopelagicaceae;g__;s__	GCA_003569145.1	82.0102	0.04	Presence
SLM_LV1_30a-K13	>3.0 um	SAMN40274653	JBCKIL000000000	7304237	6775190	6774049	6773994	97814	249985	67.0639	21	37321	17673	0.448303	17.2414	0	266	0.948657	d__Bacteria;p__Actinobacteriota;c__Actinomycetia;o__Nanopelagicales;f__Nanopelagicaceae;g__;s__	1.44991e+06	d__Bacteria;p__Actinobacteriota;c__Actinomycetia;o__Nanopelagicales;f__Nanopelagicaceae;g__;s__				Absence
SLM_LV1_02b-P16	<0.2 um	SAMN40274654	JBCKIM000000000	8488109	7965365	7962777	7962759	157832	374293	71.9593	49	29835	8518	0.459629	22.3529	0	418	0.937664	d__Bacteria;p__Actinobacteriota;c__Actinomycetia;o__Nanopelagicales;f__Nanopelagicaceae;g__;s__	1.67447e+06	d__Bacteria;p__Actinobacteriota;c__Actinomycetia;o__Nanopelagicales;f__Nanopelagicaceae;g__;s__				Absence
SLM_LV1_0208-L18	0.2~0.8 um	SAMN40274655	JBCKIN000000000	6778823	6376608	6375487	6375439	153600	448128	59.2638	47	46495	13728	0.453163	24.5135	0	487	0.933677	d__Bacteria;p__Actinobacteriota;c__Actinomycetia;o__Nanopelagicales;f__Nanopelagicaceae;g__;s__	1.82809e+06	d__Bacteria;p__Actinobacteriota;c__Actinomycetia;o__Nanopelagicales;f__Nanopelagicaceae;g__;s__				Absence
SLM_LV1_02b-J14	<0.2 um	SAMN40274656	JBCKIO000000000	9525805	8961084	8959091	8959084	254256	606448	73.4204	46	50763	20482	0.457797	29.3103	0	636	0.944749	d__Bacteria;p__Actinobacteriota;c__Actinomycetia;o__Nanopelagicales;f__Nanopelagicaceae;g__;s__	2.06906e+06	d__Bacteria;p__Actinobacteriota;c__Actinomycetia;o__Nanopelagicales;f__Nanopelagicaceae;g__;s__				Absence
SLM_LV1_30a-D05	>3.0 um	SAMN40274657	JBCKIP000000000	8997616	8397623	8396140	8396124	302799	812562	63.345	92	42053	11863	0.452802	44.3847	0	913	0.923905	d__Bacteria;p__Actinobacteriota;c__Actinomycetia;o__Nanopelagicales;f__Nanopelagicaceae;g__;s__	1.83072e+06	d__Bacteria;p__Actinobacteriota;c__Actinomycetia;o__Nanopelagicales;f__Nanopelagicaceae;g__;s__	GCA_003569145.1	76.2835	0.08	Absence
SLM_LV1_30a-A20	>3.0 um	SAMN40274658	JBCKIQ000000000	7941967	7411694	7410238	7410231	158079	339699	74.3149	59	22236	6948	0.454464	27.1944	0	400	0.941004	d__Bacteria;p__Actinobacteriota;c__Actinomycetia;o__Nanopelagicales;f__Nanopelagicaceae;g__;s__	1.24915e+06	d__Bacteria;p__Actinobacteriota;c__Actinomycetia;o__Nanopelagicales;f__Nanopelagicaceae;g__;s__				Absence
SLM_LV1_30a-F19	>3.0 um	SAMN40274659	JBCKIR000000000	8097602	7579356	7578091	7578091	246483	601664	71.6562	44	74771	21876	0.453808	24.1379	0.862069	635	0.940776	d__Bacteria;p__Actinobacteriota;c__Actinomycetia;o__Nanopelagicales;f__Nanopelagicaceae;g__UBA7398;s__	2.49261e+06	d__Bacteria;p__Actinobacteriota;c__Actinomycetia;o__Nanopelagicales;f__Nanopelagicaceae;g__;s__				Presence
SLM_LV1_02b-L10	<0.2 um	SAMN40274660	JBCKIS000000000	8865043	8251023	8249206	8249137	246290	653176	66.7371	42	56411	23295	0.456122	44.2471	0.27027	693	0.937573	d__Bacteria;p__Actinobacteriota;c__Actinomycetia;o__Nanopelagicales;f__Nanopelagicaceae;g__;s__	1.4762e+06	d__Bacteria;p__Actinobacteriota;c__Actinomycetia;o__Nanopelagicales;f__Nanopelagicaceae;g__;s__	GCF_002288005.1	80.9838	0.06	Presence
SLM_LV1_0208-I18	0.2~0.8 um	SAMN40274661	JBCKIT000000000	7804966	7361343	7353753	7353718	260207	715131	65.4442	39	76889	32025	0.452208	36.7544	0	760	0.93689	d__Bacteria;p__Actinobacteriota;c__Actinomycetia;o__Nanopelagicales;f__Nanopelagicaceae;g__;s__	1.9457e+06	d__Bacteria;p__Actinobacteriota;c__Actinomycetia;o__Nanopelagicales;f__Nanopelagicaceae;g__;s__	GCA_903878415.1	78.1368	0.14	Absence
SLM_LV1_30a-O17	>3.0 um	SAMN40274662	JBCKIU000000000	7754867	7368105	7362155	7362136	206706	530337	67.298	58	26326	14179	0.45242	26.8546	0.526316	598	0.944043	d__Bacteria;p__Actinobacteriota;c__Actinomycetia;o__Nanopelagicales;f__Nanopelagicaceae;g__;s__	1.97484e+06	d__Bacteria;p__Actinobacteriota;c__Actinomycetia;o__Nanopelagicales;f__Nanopelagicaceae;g__;s__				Absence
SLM_LV1_0208-C21	0.2~0.8 um	SAMN40274663	JBCKIV000000000	8169145	7611066	7610081	7610079	84303	184769	70.0421	32	14308	6463	0.457864	11.886	0	238	0.924527	d__Bacteria;p__Actinobacteriota;c__Actinomycetia;o__Nanopelagicales;f__Nanopelagicaceae;g__;s__	1.55451e+06	d__Bacteria;p__Actinobacteriota;c__Actinomycetia;o__Nanopelagicales;f__Nanopelagicaceae;g__;s__				Absence
SLM_LV1_0830-E23	0.8~3.0 um	SAMN40274664	JBCKIW000000000	9683000	9176844	9165952	9165760	326996	1006635	57.8869	80	56284	21371	0.638469	17.2414	0	1048	0.857821	d__Bacteria;p__Actinobacteriota;c__Actinomycetia;o__Actinomycetales;f__Micrococcaceae;g__Pseudarthrobacter;s__	5.83848e+06	d__Bacteria;p__Actinobacteriota;c__Actinomycetia;o__Actinomycetales;f__Micrococcaceae;g__Pseudarthrobacter;s__	GCF_006715285.1	90.3492	0.51	Presence
SLM_LV1_0208-A02	0.2~0.8 um	SAMN40274665	JBCKIX000000000	11001040	10354148	10339585	10339450	472635	1403476	63.3885	90	118709	31903	0.658712	29.6067	1.3468	1445	0.906572	d__Bacteria;p__Actinobacteriota;c__Actinomycetia;o__Actinomycetales;f__Microbacteriaceae;g__Microbacterium;s__Microbacterium profundi	4.7404e+06	d__Bacteria;p__Actinobacteriota;c__Actinomycetia;o__Actinomycetales;f__Microbacteriaceae;g__Microbacterium;s__Microbacterium profundi	GCF_000763375.1	98.6013	0.77	Presence
SLM_LV1_0208-N09	0.2~0.8 um	SAMN40274666	JBCKIY000000000	8325331	7870154	7868977	7868966	123234	383606	56.1053	34	34376	15010	0.585736	20.6897	0	407	0.925622	d__Bacteria;p__Actinobacteriota;c__Acidimicrobiia;o__Acidimicrobiales;f__Ilumatobacteraceae;g__;s__	1.8541e+06	d__Bacteria;p__Actinobacteriota;c__Acidimicrobiia;o__Acidimicrobiales;f__Ilumatobacteraceae;g__UBA3006;s__	GCF_007679035.1	79.6138	0.04	Presence
SLM_LV1_30a-E06	>3.0 um	SAMN40274667	JBCKIZ000000000	10585662	10046104	10042284	10042274	115012	324065	60.8299	44	24875	10885	0.567201	4.16667	0	365	0.899295	d__Bacteria;p__Actinobacteriota;c__Acidimicrobiia;o__Acidimicrobiales;f__Ilumatobacteraceae;g__UBA3006;s__	7.77756e+06	d__Bacteria;p__Actinobacteriota;c__Acidimicrobiia;o__Acidimicrobiales;f__Ilumatobacteraceae;g__UBA3006;s__				Absence
SLM_LV1_0208-N14	0.2~0.8 um	SAMN40274668	JBCKJA000000000	8433342	7960582	7956435	7956422	103658	208246	71.0757	36	18389	6706	0.58138	10.0427	0	246	0.938712	d__Bacteria;p__Actinobacteriota;c__Acidimicrobiia;o__Acidimicrobiales;f__Ilumatobacteraceae;g__UBA3006;s__	2.0736e+06	d__Bacteria;p__Actinobacteriota;c__Acidimicrobiia;o__Acidimicrobiales;f__Ilumatobacteraceae;g__UBA3006;s__				Absence
SLM_LV1_0208-M17	0.2~0.8 um	SAMN40274669	JBCKJB000000000	8168440	7608580	7602722	7602698	153290	381521	68.1181	58	39338	8961	0.571706	15.5172	1.72414	437	0.914193	d__Bacteria;p__Actinobacteriota;c__Acidimicrobiia;o__Acidimicrobiales;f__Ilumatobacteraceae;g__;s__	2.45869e+06	d__Bacteria;p__Actinobacteriota;c__Acidimicrobiia;o__Acidimicrobiales;f__Ilumatobacteraceae;g__UBA3006;s__				Absence
SLM_LV1_0208-K04	0.2~0.8 um	SAMN40274670	JBCKJC000000000	8875482	8376003	8374330	8374314	140279	369732	66.451	34	43214	15412	0.580631	10.3448	0	385	0.92904	d__Bacteria;p__Actinobacteriota;c__Acidimicrobiia;o__Acidimicrobiales;f__Ilumatobacteraceae;g__;s__	3.57408e+06	d__Bacteria;p__Actinobacteriota;c__Acidimicrobiia;o__Acidimicrobiales;f__Ilumatobacteraceae;g__UBA3006;s__	GCA_018969685.1	77.8954	0.18	Absence
SLM_LV1_30a-G16	>3.0 um	SAMN40274671	JBCKJD000000000	11050682	10424139	10422664	10422662	149020	369292	68.1145	34	38999	19879	0.550126	19.4561	0	417	0.928509	d__Bacteria;p__Actinobacteriota;c__Acidimicrobiia;o__Acidimicrobiales;f__Ilumatobacteraceae;g__UBA3006;s__	1.89808e+06	d__Bacteria;p__Actinobacteriota;c__Acidimicrobiia;o__Acidimicrobiales;f__Ilumatobacteraceae;g__UBA3006;s__				Absence
SLM_LV1_0830-F05	0.8~3.0 um	SAMN40274672	JBCKJE000000000	11719402	11038692	11037538	11037507	67827	131984	69.4241	26	14696	6060	0.567326	9.92403	0	160	0.903776	d__Bacteria;p__Actinobacteriota;c__Acidimicrobiia;o__Acidimicrobiales;f__Ilumatobacteraceae;g__UBA3006;s__	1.32994e+06	d__Bacteria;p__Actinobacteriota;c__Acidimicrobiia;o__Acidimicrobiales;f__Ilumatobacteraceae;g__UBA3006;s__				Absence
SLM_LV1_30a-O06	>3.0 um	SAMN40274673	JBCKJF000000000	10130712	9569716	9562303	9562303	245276	674053	62.4332	77	47807	12535	0.565374	18.8034	0	729	0.921979	d__Bacteria;p__Actinobacteriota;c__Acidimicrobiia;o__Acidimicrobiales;f__Ilumatobacteraceae;g__UBA3006;s__	3.58474e+06	d__Bacteria;p__Actinobacteriota;c__Acidimicrobiia;o__Acidimicrobiales;f__Ilumatobacteraceae;g__UBA3006;s__	GCA_016875795.1	80.0595	0.01	Absence
SLM_LV1_0208-I02	0.2~0.8 um	SAMN40274674	JBCKJG000000000	8993260	8476677	8474297	8474281	252275	592230	67.5828	76	35362	10222	0.574005	17.9487	0	661	0.931847	d__Bacteria;p__Actinobacteriota;c__Acidimicrobiia;o__Acidimicrobiales;f__Ilumatobacteraceae;g__UBA3006;s__	3.29957e+06	d__Bacteria;p__Actinobacteriota;c__Acidimicrobiia;o__Acidimicrobiales;f__Ilumatobacteraceae;g__UBA3006;s__	GCF_001424755.1	84.8601	0.03	Absence
SLM_LV1_30a-E02	>3.0 um	SAMN40274675	JBCKJH000000000	8329934	7838173	7834955	7834953	152920	389807	64.258	41	37656	13119	0.568733	12.6781	0	457	0.918565	d__Bacteria;p__Actinobacteriota;c__Acidimicrobiia;o__Acidimicrobiales;f__Ilumatobacteraceae;g__UBA3006;s__	3.07466e+06	d__Bacteria;p__Actinobacteriota;c__Acidimicrobiia;o__Acidimicrobiales;f__Ilumatobacteraceae;g__UBA3006;s__				Absence
SLM_LV1_0208-M14	0.2~0.8 um	SAMN40274676	JBCKJI000000000	8361052	7851641	7848091	7848053	178000	454114	65.8804	59	24743	12338	0.581944	23.2759	0	518	0.927694	d__Bacteria;p__Actinobacteriota;c__Acidimicrobiia;o__Acidimicrobiales;f__Ilumatobacteraceae;g__;s__	1.95101e+06	d__Bacteria;p__Actinobacteriota;c__Acidimicrobiia;o__Acidimicrobiales;f__Ilumatobacteraceae;g__UBA3006;s__				Absence
SLM_LV1_0830-O16	0.8~3.0 um	SAMN40274677	PP729361-PP729376	11647489	10931356	10928116	10928102	28151	97019	45.4799	16	15077	7239	0.55653	9.55711	0.854701	114	0.888352	d__Bacteria;p__Actinobacteriota;c__Acidimicrobiia;o__Acidimicrobiales;f__Ilumatobacteraceae;g__UBA3006;s__	1.01515e+06	d__Bacteria;p__Actinobacteriota;c__Acidimicrobiia;o__Acidimicrobiales;f__Ilumatobacteraceae;g__UBA3006;s__				Absence
SLM_LV1_30a-P22	>3.0 um	SAMN40274678	JBCKJJ000000000	7624502	7120935	7117796	7117772	234443	629494	61.5548	72	34506	11713	0.566754	23.0769	0	722	0.914407	d__Bacteria;p__Actinobacteriota;c__Acidimicrobiia;o__Acidimicrobiales;f__Ilumatobacteraceae;g__UBA3006;s__	2.72781e+06	d__Bacteria;p__Actinobacteriota;c__Acidimicrobiia;o__Acidimicrobiales;f__Ilumatobacteraceae;g__UBA3006;s__	GCA_016711105.1	80.5481	0.01	Presence
SLM_LV1_0208-B06	0.2~0.8 um	SAMN40274679	JBCKJK000000000	7710287	7226391	7224429	7224382	326672	834429	70.0623	51	111382	23270	0.557781	38.1766	0	905	0.904273	d__Bacteria;p__Actinobacteriota;c__Acidimicrobiia;o__Acidimicrobiales;f__Ilumatobacteraceae;g__UBA3006;s__	2.18571e+06	d__Bacteria;p__Actinobacteriota;c__Acidimicrobiia;o__Acidimicrobiales;f__Ilumatobacteraceae;g__UBA3006;s__	GCA_009377395.1	80.1895	0	Absence
SLM_LV1_30a-P18	>3.0 um	SAMN40274680	JBCKJL000000000	7862871	7249892	7247974	7247826	161122	354507	70.0576	62	26655	6416	0.560435	8.62069	0	393	0.907514	d__Bacteria;p__Actinobacteriota;c__Acidimicrobiia;o__Acidimicrobiales;f__Ilumatobacteraceae;g__UBA3006;s__	4.11228e+06	d__Bacteria;p__Actinobacteriota;c__Acidimicrobiia;o__Acidimicrobiales;f__Ilumatobacteraceae;g__UBA3006;s__				Presence
SLM_LV1_30a-C05	>3.0 um	SAMN40274681	JBCKJM000000000	7243026	6842427	6840552	6840545	227822	665749	56.508	70	49412	16985	0.561168	30.5724	0	753	0.897236	d__Bacteria;p__Actinobacteriota;c__Acidimicrobiia;o__Acidimicrobiales;f__Ilumatobacteraceae;g__;s__	2.17762e+06	d__Bacteria;p__Actinobacteriota;c__Acidimicrobiia;o__Acidimicrobiales;f__Ilumatobacteraceae;g__UBA3006;s__	GCA_016870935.1	78.0225	0.13	Absence
SLM_LV1_0830-L14	0.8~3.0 um	SAMN40274682	JBCKJN000000000	11011610	10297568	10296002	10295973	437247	1087019	70.4506	89	63734	23278	0.502775	51.2346	0.854701	1173	0.938199	d__Bacteria;p__Actinobacteriota;c__Acidimicrobiia;o__Acidimicrobiales;f__Ilumatobacteraceae;g__UBA2093;s__	2.12165e+06	d__Bacteria;p__Actinobacteriota;c__Acidimicrobiia;o__Acidimicrobiales;f__Ilumatobacteraceae;g__UBA2093;s__	GCA_903934195.1	76.7546	0.08	Absence
SLM_LV1_02b-C13	<0.2 um	SAMN40274683	JBCKJO000000000	10415125	9536971	9533927	9533847	217366	504592	71.1779	57	29788	12701	0.499588	15.5172	0	527	0.93406	d__Bacteria;p__Actinobacteriota;c__Acidimicrobiia;o__Acidimicrobiales;f__Ilumatobacteraceae;g__UBA2093;s__	3.25182e+06	d__Bacteria;p__Actinobacteriota;c__Acidimicrobiia;o__Acidimicrobiales;f__Ilumatobacteraceae;g__UBA2093;s__				Absence
SLM_LV1_30a-N06	>3.0 um	SAMN40274684	JBCKJP000000000	10621833	10050250	10049470	10049350	171038	405153	67.1854	83	14448	5574	0.496032	12.5	4.16667	479	0.947793	d__Bacteria;p__Actinobacteriota;c__Acidimicrobiia;o__Acidimicrobiales;f__Ilumatobacteraceae;g__UBA2093;s__	3241224	d__Bacteria;p__Actinobacteriota;c__Acidimicrobiia;o__Acidimicrobiales;f__Ilumatobacteraceae;g__UBA2093;s__				Absence
SLM_MC1B_810-D05	8~10 cm	SAMN40274685	JBCKJQ000000000	9045738	8476606	8458530	8458476	429492	1145207	62.2773	111	48316	15449	0.632259	32.7586	0	1243	0.921328	d__Bacteria;p__Actinobacteriota;c__Acidimicrobiia;o__Acidimicrobiales;f__Ilumatobacteraceae;g__UBA668;s__	3.4959e+06	d__Bacteria;p__Actinobacteriota;c__Acidimicrobiia;o__Acidimicrobiales;f__Ilumatobacteraceae;g__UBA668;s__	GCA_016716065.1	80.8978	0.01	Absence
SLM_LV1_0208-J05	0.2~0.8 um	SAMN40274686	JBCKJR000000000	9681538	8963248	8921313	8921197	665913	1844507	64.3717	119	92853	28191	0.662446	41.0256	0	1932	0.888798	d__Bacteria;p__Actinobacteriota;c__Acidimicrobiia;o__Acidimicrobiales;f__CAIXPF01;g__CAIXPF01;s__	4.49599e+06	d__Bacteria;p__Actinobacteriota;c__Acidimicrobiia;o__Acidimicrobiales;f__CAIXPF01;g__CAIXPF01;s__	GCA_015486285.1	85.7302	0	Absence
SLM_LV1_30a-M19	>3.0 um	SAMN40274687	JBCKJS000000000	9560774	9052073	9028621	9026889	250894	675629	60.9452	89	32977	9842	0.644132	14.8903	0	739	0.86258	d__Bacteria;p__Actinobacteriota;c__Acidimicrobiia;o__Acidimicrobiales;f__CAIXPF01;g__CAIXPF01;s__	4.53738e+06	d__Bacteria;p__Actinobacteriota;c__Acidimicrobiia;o__Acidimicrobiales;f__CAIXPF01;g__CAIXPF01;s__	GCF_010730955.1	90.4848	0.01	Presence
SLM_LV1_30a-K22	>3.0 um	SAMN40274688	JBCKJT000000000	8977620	8554133	8515904	8515868	362934	937047	67.5649	73	68347	23862	0.690176	45.9829	2.65907	1003	0.913458	d__Bacteria;p__Actinobacteriota;c__Acidimicrobiia;o__Acidimicrobiales;f__JACDCH01;g__VFJN01;s__	2.03782e+06	d__Bacteria;p__Actinobacteriota;c__Acidimicrobiia;o__Acidimicrobiales;f__JACDCH01;g__VFJN01;s__	GCF_011382965.1	81.609	0.03	Presence
SLM_LV1_0208-C23	0.2~0.8 um	SAMN40274689	JBCKJU000000000	8634726	8086607	8083094	8083068	216685	545174	68.6301	73	35523	8734	0.545679	32.7586	0	594	0.939863	d__Bacteria;p__Actinobacteriota;c__Acidimicrobiia;o__IMCC26256;f__PALSA-555;g__SHUY01;s__	1.66422e+06	d__Bacteria;p__Actinobacteriota;c__Acidimicrobiia;o__IMCC26256;f__PALSA-555;g__SHUY01;s__				Absence
SLM_LV1_0830-G13	0.8~3.0 um	SAMN40274690	JBCKJV000000000	8303543	7603274	7601093	7601000	206327	546063	65.1259	47	74204	15072	0.5448	36.2069	0	552	0.944779	d__Bacteria;p__Actinobacteriota;c__Acidimicrobiia;o__IMCC26256;f__PALSA-555;g__SHUY01;s__	1.50817e+06	d__Bacteria;p__Actinobacteriota;c__Acidimicrobiia;o__IMCC26256;f__PALSA-555;g__SHUY01;s__	GCA_009694435.1	76.7295	0.21	Absence
SLM_LV1_0208-B11	0.2~0.8 um	SAMN40274691	JBCKJW000000000	8610324	8025461	8018545	8018521	227838	581266	67.685	56	51288	16987	0.551868	4.16667	0	600	0.938548	d__Bacteria;p__Actinobacteriota;c__Acidimicrobiia;o__IMCC26256;f__PALSA-555;g__SHUY01;s__	1.39504e+07	d__Bacteria;p__Actinobacteriota;c__Acidimicrobiia;o__IMCC26256;f__PALSA-555;g__SHUY01;s__	GCA_009694435.1	76.9499	0.15	Absence
SLM_LV1_0830-M16	0.8~3.0 um	SAMN40274692	JBCKJX000000000	7173678	6653873	6653019	6653017	131513	326258	62.7978	59	30498	6207	0.544618	16.4577	3.44828	356	0.924449	d__Bacteria;p__Actinobacteriota;c__Acidimicrobiia;o__IMCC26256;f__PALSA-555;g__SHUY01;s__	1.98241e+06	d__Bacteria;p__Actinobacteriota;c__Acidimicrobiia;o__IMCC26256;f__PALSA-555;g__SHUY01;s__	GCA_009694435.1	77.1302	0.26	Presence
SLM_LV1_0830-O04	0.8~3.0 um	SAMN40274693	JBCKJY000000000	8964573	8457561	8453983	8453980	354331	904354	67.4487	77	40732	16981	0.549031	44.0171	0	951	0.941052	d__Bacteria;p__Actinobacteriota;c__Acidimicrobiia;o__IMCC26256;f__PALSA-555;g__SHUY01;s__	2.05455e+06	d__Bacteria;p__Actinobacteriota;c__Acidimicrobiia;o__IMCC26256;f__PALSA-555;g__SHUY01;s__	GCA_009694435.1	77.2826	0.25	Absence
SLM_LV1_0208-G13	0.2~0.8 um	SAMN40274694	JBCKJZ000000000	8296056	7819145	7817219	7817190	289693	689264	70.0781	88	28164	10845	0.552614	36.2143	0	719	0.925468	d__Bacteria;p__Actinobacteriota;c__Acidimicrobiia;o__IMCC26256;f__PALSA-555;g__SHUY01;s__	1.90329e+06	d__Bacteria;p__Actinobacteriota;c__Acidimicrobiia;o__IMCC26256;f__PALSA-555;g__SHUY01;s__	GCA_009694435.1	78.0409	0.22	Presence
SLM_LV1_0830-J05	0.8~3.0 um	SAMN40274695	JBCKKA000000000	8346988	7852534	7846877	7846854	508155	1299101	68.9227	84	92857	27900	0.54901	68.8034	0	1324	0.933932	d__Bacteria;p__Actinobacteriota;c__Acidimicrobiia;o__IMCC26256;f__PALSA-555;g__SHUY01;s__	1.88813e+06	d__Bacteria;p__Actinobacteriota;c__Acidimicrobiia;o__IMCC26256;f__PALSA-555;g__SHUY01;s__	GCF_900105715.1	85.3828	0.01	Presence
SLM_LV1_0208-N16	0.2~0.8 um	SAMN40274696	JBCKKB000000000	8096651	7628756	7625780	7625691	437571	1167881	67.3312	82	57585	22709	0.550565	48.7179	0.854701	1217	0.934964	d__Bacteria;p__Actinobacteriota;c__Acidimicrobiia;o__IMCC26256;f__PALSA-555;g__SHUY01;s__	2.39723e+06	d__Bacteria;p__Actinobacteriota;c__Acidimicrobiia;o__IMCC26256;f__PALSA-555;g__SHUY01;s__	GCF_000400485.1	78.7425	0.01	Absence
SLM_MC1B_68-O05	6~8 cm	SAMN40274697	JBCKKC000000000	10611086	10006774	9996661	9996659	834576	2000772	72.2961	123	115486	28431	0.556034	73.4266	2.13675	1926	0.883714	d__Bacteria;p__Actinobacteriota;c__Acidimicrobiia;o__UBA2766;f__UBA2766;g__;s__	2.72486e+06	d__Bacteria;p__Actinobacteriota;c__Acidimicrobiia;o__UBA2766;f__UBA2766;g__;s__	GCF_000242255.2	82.9319	0	Presence
SLM_LV1_30a-K20	>3.0 um	SAMN40274698	JBCKKD000000000	6838529	6451948	6434260	6434130	101652	256247	63.3271	47	24553	6221	0.637771	5.53051	0.473934	386	0.905579	d__Bacteria;p__Proteobacteria;c__Gammaproteobacteria;o__Burkholderiales;f__SG8-39;g__RBG-16-66-20;s__	4.63334e+06	d__Bacteria;p__Proteobacteria;c__Gammaproteobacteria;o__Burkholderiales;f__SG8-39;g__RBG-16-66-20;s__	GCA_016177575.1	83.6277	0.36	Absence
SLM_LV1_30a-K03	>3.0 um	SAMN40274699	JBCKKE000000000	8267997	7794257	7788870	7788825	385500	1117704	60.3112	109	47866	17484	0.643948	35.6472	0	1244	0.905451	d__Bacteria;p__Proteobacteria;c__Gammaproteobacteria;o__Burkholderiales;f__SG8-39;g__RBG-16-66-20;s__	3.13546e+06	d__Bacteria;p__Proteobacteria;c__Gammaproteobacteria;o__Burkholderiales;f__SG8-39;g__RBG-16-66-20;s__	GCA_001770285.1	82.5249	0.58	Absence
SLM_LV1_30a-K09	>3.0 um	SAMN40274700	JBCKKF000000000	7582511	7145999	7111223	7110743	461681	1301321	63.6319	81	101657	32276	0.652507	42.0278	0.157978	1460	0.921048	d__Bacteria;p__Proteobacteria;c__Gammaproteobacteria;o__Burkholderiales;f__SG8-39;g__RBG-16-66-20;s__	3.09634e+06	d__Bacteria;p__Proteobacteria;c__Gammaproteobacteria;o__Burkholderiales;f__SG8-39;g__RBG-16-66-20;s__	GCA_001770285.1	82.7426	0.56	Absence
SLM_LV1_0830-I22	0.8~3.0 um	SAMN40274701	JBCKKG000000000	9908457	9351057	9332256	9332216	314438	889835	61.4007	98	44705	12379	0.64216	28.8226	0.631912	975	0.906687	d__Bacteria;p__Proteobacteria;c__Gammaproteobacteria;o__Burkholderiales;f__SG8-39;g__RBG-16-66-20;s__	3.08729e+06	d__Bacteria;p__Proteobacteria;c__Gammaproteobacteria;o__Burkholderiales;f__SG8-39;g__RBG-16-66-20;s__	GCA_009693345.1	82.4567	0.46	Absence
SLM_LV1_0208-M21	0.2~0.8 um	SAMN40274702	JBCKKH000000000	8905237	8447574	8409920	8409854	506010	1342128	61.4858	183	33686	9991	0.643417	31.8871	0	1563	0.910505	d__Bacteria;p__Proteobacteria;c__Gammaproteobacteria;o__Burkholderiales;f__SG8-39;g__RBG-16-66-20;s__	4.209e+06	d__Bacteria;p__Proteobacteria;c__Gammaproteobacteria;o__Burkholderiales;f__SG8-39;g__RBG-16-66-20;s__	GCF_003315635.1	82.8698	0	Presence
SLM_LV1_0830-N03	0.8~3.0 um	SAMN40274703	JBCKKI000000000	10282475	9789023	9786284	9786121	114062	249341	67.4824	54	11549	5270	0.630434	11.5204	0	311	0.900799	d__Bacteria;p__Proteobacteria;c__Gammaproteobacteria;o__Burkholderiales;f__SG8-39;g__RBG-16-66-20;s__	2.16435e+06	d__Bacteria;p__Proteobacteria;c__Gammaproteobacteria;o__Burkholderiales;f__SG8-39;g__RBG-16-66-20;s__	GCA_001770285.1	83.308	0.55	Absence
SLM_LV1_0830-P07	0.8~3.0 um	SAMN40274704	JBCKKJ000000000	8438337	8045220	8034188	8034176	259526	659326	64.0704	88	25071	11313	0.639473	20.4784	0.0677048	768	0.906855	d__Bacteria;p__Proteobacteria;c__Gammaproteobacteria;o__Burkholderiales;f__SG8-39;g__RBG-16-66-20;s__	3.21962e+06	d__Bacteria;p__Proteobacteria;c__Gammaproteobacteria;o__Burkholderiales;f__SG8-39;g__RBG-16-66-20;s__	GCA_001770285.1	83.2404	0.51	Presence
SLM_LV1_0208-O17	0.2~0.8 um	SAMN40274705	JBCKKK000000000	9476933	8953129	8933330	8933145	240187	563225	69.1121	92	21784	8452	0.641325	18.7945	0	668	0.902911	d__Bacteria;p__Proteobacteria;c__Gammaproteobacteria;o__Burkholderiales;f__SG8-39;g__RBG-16-66-20;s__	2.99676e+06	d__Bacteria;p__Proteobacteria;c__Gammaproteobacteria;o__Burkholderiales;f__SG8-39;g__RBG-16-66-20;s__	GCA_016177575.1	81.6455	0.39	Absence
SLM_LV1_0830-I23	0.8~3.0 um	SAMN40274706	JBCKKL000000000	11477561	10738265	10725823	10725765	240690	538887	68.2443	93	21075	7170	0.647826	22.9861	0	639	0.915661	d__Bacteria;p__Proteobacteria;c__Gammaproteobacteria;o__Burkholderiales;f__SG8-39;g__RBG-16-66-20;s__	2.3444e+06	d__Bacteria;p__Proteobacteria;c__Gammaproteobacteria;o__Burkholderiales;f__SG8-39;g__RBG-16-66-20;s__	GCA_001770285.1	82.5835	0.71	Absence
SLM_LV1_30a-P13	>3.0 um	SAMN40274707	JBCKKM000000000	6650021	6164472	6153351	6153249	257144	657540	66.397	60	41294	21870	0.642419	18.9655	0	757	0.893054	d__Bacteria;p__Proteobacteria;c__Gammaproteobacteria;o__Burkholderiales;f__SG8-39;g__RBG-16-66-20;s__	3.46703e+06	d__Bacteria;p__Proteobacteria;c__Gammaproteobacteria;o__Burkholderiales;f__SG8-39;g__RBG-16-66-20;s__	GCA_902783515.1	84.6861	0.01	Presence
SLM_LV1_0208-N08	0.2~0.8 um	SAMN40274708	JBCKKN000000000	8087439	7575162	7572842	7572760	206617	671098	50.7516	91	29737	9849	0.633571	18.9655	0	761	0.902615	d__Bacteria;p__Proteobacteria;c__Gammaproteobacteria;o__Burkholderiales;f__SG8-39;g__RBG-16-66-20;s__	3.53852e+06	d__Bacteria;p__Proteobacteria;c__Gammaproteobacteria;o__Burkholderiales;f__SG8-39;g__RBG-16-66-20;s__	GCA_001770285.1	82.2648	0.5	Absence
SLM_LV1_0208-N03	0.2~0.8 um	SAMN40274709	JBCKKO000000000	8368639	7914756	7911836	7911651	130308	413052	51.1881	65	26063	8054	0.62626	11.6904	0.473934	492	0.882354	d__Bacteria;p__Proteobacteria;c__Gammaproteobacteria;o__Burkholderiales;f__SG8-39;g__RBG-16-66-20;s__	3.53327e+06	d__Bacteria;p__Proteobacteria;c__Gammaproteobacteria;o__Burkholderiales;f__SG8-39;g__RBG-16-66-20;s__	GCA_005240145.1	83.5802	0.39	Absence
SLM_LV1_0830-B23	0.8~3.0 um	SAMN40274710	JBCKKP000000000	9589288	9054741	9040968	9040734	122676	341739	55.9951	66	15108	5943	0.633325	9.24478	0	433	0.891403	d__Bacteria;p__Proteobacteria;c__Gammaproteobacteria;o__Burkholderiales;f__SG8-39;g__RBG-16-66-20;s__	3.69656e+06	d__Bacteria;p__Proteobacteria;c__Gammaproteobacteria;o__Burkholderiales;f__SG8-39;g__RBG-16-66-20;s__	GCA_009693345.1	82.2049	0.35	Absence
SLM_LV1_0208-O04	0.2~0.8 um	SAMN40274711	JBCKKQ000000000	9335512	8880908	8872169	8871959	242345	684257	59.5251	77	43445	12140	0.63461	22.96	0.501812	787	0.886836	d__Bacteria;p__Proteobacteria;c__Gammaproteobacteria;o__Burkholderiales;f__SG8-39;g__RBG-16-66-20;s__	2.98022e+06	d__Bacteria;p__Proteobacteria;c__Gammaproteobacteria;o__Burkholderiales;f__SG8-39;g__RBG-16-66-20;s__	GCA_004564215.1	83.1319	0.02	Presence
SLM_LV1_0208-K06	0.2~0.8 um	SAMN40274712	JBCKKR000000000	9304095	8704104	8700017	8700002	64200	237833	44.8181	28	24030	10919	0.61647	3.48281	0	285	0.913607	d__Bacteria;p__Proteobacteria;c__Gammaproteobacteria;o__Burkholderiales;f__SG8-39;g__RBG-16-66-20;s__	6.82876e+06	d__Bacteria;p__Proteobacteria;c__Gammaproteobacteria;o__Burkholderiales;f__SG8-39;g__RBG-16-66-20;s__	GCA_016177575.1	84.8035	0.17	Absence
SLM_MC1B_810-C05	8~10 cm	SAMN40274713	JBCKKS000000000	8910914	8228479	8213737	8213656	298040	761413	65.4745	85	39594	14911	0.644611	16.3793	0	852	0.915753	d__Bacteria;p__Proteobacteria;c__Gammaproteobacteria;o__Burkholderiales;f__SG8-39;g__RBG-16-66-20;s__	4.64863e+06	d__Bacteria;p__Proteobacteria;c__Gammaproteobacteria;o__Burkholderiales;f__SG8-39;g__RBG-16-66-20;s__	GCA_013813715.1	88.6062	0.01	Absence
SLM_LV1_0830-P17	0.8~3.0 um	SAMN40274714	JBCKKT000000000	10639430	10101843	10088891	10088874	283616	695586	66.2407	89	45647	10981	0.644564	19.8276	0	785	0.889832	d__Bacteria;p__Proteobacteria;c__Gammaproteobacteria;o__Burkholderiales;f__SG8-39;g__RBG-16-66-20;s__	3.50817e+06	d__Bacteria;p__Proteobacteria;c__Gammaproteobacteria;o__Burkholderiales;f__SG8-39;g__RBG-16-66-20;s__	GCF_014201825.1	84.8853	0.01	Presence
SLM_MC1B_02-I03	0~2 cm	SAMN40274715	JBCKKU000000000	11875108	11230472	11225194	11225145	431016	1257811	57.6913	142	39449	12816	0.638685	27.5862	0	1416	0.910688	d__Bacteria;p__Proteobacteria;c__Gammaproteobacteria;o__Burkholderiales;f__SG8-39;g__RBG-16-66-20;s__	4.55956e+06	d__Bacteria;p__Proteobacteria;c__Gammaproteobacteria;o__Burkholderiales;f__SG8-39;g__RBG-16-66-20;s__	GCF_008370345.1	89.1587	0.01	Presence
SLM_MC1B_02-I08	0~2 cm	SAMN40274716	JBCKKV000000000	7610888	7232575	7226737	7226670	473713	1303581	63.7722	122	73545	13983	0.633714	28.3909	0	1469	0.900413	d__Bacteria;p__Proteobacteria;c__Gammaproteobacteria;o__Burkholderiales;f__SG8-39;g__RBG-16-66-20;s__	4.59155e+06	d__Bacteria;p__Proteobacteria;c__Gammaproteobacteria;o__Burkholderiales;f__SG8-39;g__RBG-16-66-20;s__	GCF_008017445.1	84.2392	0	Presence
SLM_MC1B_02-C22	0~2 cm	SAMN40274717	JBCKKW000000000	10882565	10172859	10161884	10159418	322509	817517	64.8829	117	30300	10465	0.639419	16.3793	1.72414	958	0.911532	d__Bacteria;p__Proteobacteria;c__Gammaproteobacteria;o__Burkholderiales;f__SG8-39;g__RBG-16-66-20;s__	4.99116e+06	d__Bacteria;p__Proteobacteria;c__Gammaproteobacteria;o__Burkholderiales;f__SG8-39;g__RBG-16-66-20;s__	GCA_009693345.1	83.9879	0.47	Absence
SLM_MC1B_02-G21	0~2 cm	SAMN40274718	JBCKKX000000000	9489929	8963964	8874337	8874322	617916	1823062	58.0076	140	87346	23969	0.639036	45.2979	0.189573	2051	0.914069	d__Bacteria;p__Proteobacteria;c__Gammaproteobacteria;o__Burkholderiales;f__SG8-39;g__RBG-16-66-20;s__	4.02461e+06	d__Bacteria;p__Proteobacteria;c__Gammaproteobacteria;o__Burkholderiales;f__SG8-39;g__RBG-16-66-20;s__	GCA_009693345.1	84.3063	0.43	Absence
SLM_LV1_30a-N20	>3.0 um	SAMN40274719	JBCKKY000000000	8470629	7906924	7899759	7899705	233636	571725	62.3162	93	39907	6988	0.6341	16.0922	0	720	0.901344	d__Bacteria;p__Proteobacteria;c__Gammaproteobacteria;o__Burkholderiales;f__SG8-39;g__RBG-16-66-20;s__	3.55281e+06	d__Bacteria;p__Proteobacteria;c__Gammaproteobacteria;o__Burkholderiales;f__SG8-39;g__RBG-16-66-20;s__	GCA_009693345.1	84.8877	0.42	Absence
SLM_MC1B_68-L02	6~8 cm	SAMN40274720	JBCKKZ000000000	8386576	7902954	7898355	7898350	586529	2062639	50.7988	123	81080	37780	0.638815	55.1399	0.738779	2335	0.914899	d__Bacteria;p__Proteobacteria;c__Gammaproteobacteria;o__Burkholderiales;f__SG8-39;g__RBG-16-66-20;s__	3.74074e+06	d__Bacteria;p__Proteobacteria;c__Gammaproteobacteria;o__Burkholderiales;f__SG8-39;g__RBG-16-66-20;s__	GCA_009693345.1	84.3717	0.42	Presence
SLM_MC1B_02-B16	0~2 cm	SAMN40274721	JBCKLA000000000	10245199	9641216	9609769	9609748	475087	1335450	61.5237	111	64477	18207	0.63516	32.7489	0.0677048	1527	0.913655	d__Bacteria;p__Proteobacteria;c__Gammaproteobacteria;o__Burkholderiales;f__SG8-39;g__RBG-16-66-20;s__	4.07785e+06	d__Bacteria;p__Proteobacteria;c__Gammaproteobacteria;o__Burkholderiales;f__SG8-39;g__RBG-16-66-20;s__	GCA_009693345.1	84.1193	0.42	Absence
SLM_MC1B_810-D03	8~10 cm	SAMN40274722	JBCKLB000000000	6745326	6287911	6281438	6281349	674754	2100631	54.737	183	72954	17003	0.635565	38.9901	0.473934	2384	0.912412	d__Bacteria;p__Proteobacteria;c__Gammaproteobacteria;o__Burkholderiales;f__SG8-39;g__RBG-16-66-20;s__	5.38761e+06	d__Bacteria;p__Proteobacteria;c__Gammaproteobacteria;o__Burkholderiales;f__SG8-39;g__RBG-16-66-20;s__	GCA_009693345.1	83.6426	0.35	Absence
SLM_LV1_30a-A13	>3.0 um	SAMN40274723	JBCKLC000000000	7606604	7202746	7191169	7191056	454913	1278104	62.0845	123	62291	15980	0.638213	28.5248	0.157978	1465	0.918726	d__Bacteria;p__Proteobacteria;c__Gammaproteobacteria;o__Burkholderiales;f__SG8-39;g__RBG-16-66-20;s__	4.48068e+06	d__Bacteria;p__Proteobacteria;c__Gammaproteobacteria;o__Burkholderiales;f__SG8-39;g__RBG-16-66-20;s__	GCA_009693345.1	84.5808	0.43	Absence
SLM_MC1B_02-K09	0~2 cm	SAMN40274724	JBCKLD000000000	11947842	11311303	11299828	11299740	485549	1611721	52.6211	109	81613	24183	0.6415	45.5569	0.225683	1760	0.91812	d__Bacteria;p__Proteobacteria;c__Gammaproteobacteria;o__Burkholderiales;f__SG8-39;g__RBG-16-66-20;s__	3.53782e+06	d__Bacteria;p__Proteobacteria;c__Gammaproteobacteria;o__Burkholderiales;f__SG8-39;g__RBG-16-66-20;s__	GCA_009693345.1	84.6929	0.5	Presence
SLM_MC1B_02-J07	0~2 cm	SAMN40274725	JBCKLE000000000	8651962	8083118	8077834	8077824	286904	822080	58.5547	97	36324	12541	0.637727	22.4138	0	875	0.916209	d__Bacteria;p__Proteobacteria;c__Gammaproteobacteria;o__Burkholderiales;f__SG8-39;g__RBG-16-66-20;s__	3.66774e+06	d__Bacteria;p__Proteobacteria;c__Gammaproteobacteria;o__Burkholderiales;f__SG8-39;g__RBG-16-66-20;s__	GCA_009693345.1	83.9039	0.38	Absence
SLM_MC1B_02-J21	0~2 cm	SAMN40274726	JBCKLF000000000	8887042	8391889	8381558	8381532	555377	1556709	60.8193	121	54923	22768	0.637655	41.9952	0.236967	1710	0.914947	d__Bacteria;p__Proteobacteria;c__Gammaproteobacteria;o__Burkholderiales;f__SG8-39;g__RBG-16-66-20;s__	3.70688e+06	d__Bacteria;p__Proteobacteria;c__Gammaproteobacteria;o__Burkholderiales;f__SG8-39;g__RBG-16-66-20;s__	GCA_009693345.1	84.5539	0.38	Presence
SLM_MC1B_02-G19	0~2 cm	SAMN40274727	JBCKLG000000000	10014268	9485688	9448635	9448633	739984	1820481	69.4835	131	176106	21092	0.641721	38.7292	0.157978	1978	0.922659	d__Bacteria;p__Proteobacteria;c__Gammaproteobacteria;o__Burkholderiales;f__SG8-39;g__RBG-16-66-20;s__	4.70054e+06	d__Bacteria;p__Proteobacteria;c__Gammaproteobacteria;o__Burkholderiales;f__SG8-39;g__RBG-16-66-20;s__	GCA_009693345.1	84.2237	0.43	Absence
SLM_MC1B_02-C21	0~2 cm	SAMN40274728	JBCKLH000000000	8783043	8214610	8201161	8201143	351730	869314	67.373	103	24574	11456	0.634807	18.6252	0	985	0.900616	d__Bacteria;p__Proteobacteria;c__Gammaproteobacteria;o__Burkholderiales;f__SG8-39;g__RBG-16-66-20;s__	4.6674e+06	d__Bacteria;p__Proteobacteria;c__Gammaproteobacteria;o__Burkholderiales;f__SG8-39;g__RBG-16-66-20;s__	GCA_009693345.1	84.1796	0.36	Presence
SLM_MC1B_02-F07	0~2 cm	SAMN40274729	JBCKLI000000000	9489742	8864063	8839903	8839797	330190	866789	66.0493	84	46357	16543	0.63443	12.7405	0	971	0.906607	d__Bacteria;p__Proteobacteria;c__Gammaproteobacteria;o__Burkholderiales;f__SG8-39;g__RBG-16-66-20;s__	6.80344e+06	d__Bacteria;p__Proteobacteria;c__Gammaproteobacteria;o__Burkholderiales;f__SG8-39;g__RBG-16-66-20;s__	GCA_009693345.1	84.3143	0.4	Absence
SLM_MC1B_810-C14	8~10 cm	SAMN40274730	JBCKLJ000000000	7618177	7059785	7039110	7039077	295598	872195	56.1655	106	33525	12897	0.631081	23.6226	0	1018	0.898536	d__Bacteria;p__Proteobacteria;c__Gammaproteobacteria;o__Burkholderiales;f__SG8-39;g__RBG-16-66-20;s__	3.69221e+06	d__Bacteria;p__Proteobacteria;c__Gammaproteobacteria;o__Burkholderiales;f__SG8-39;g__RBG-16-66-20;s__	GCA_009693345.1	84.0386	0.43	Absence
SLM_LV1_0830-D04	0.8~3.0 um	SAMN40274731	JBCKLK000000000	8734946	8127663	8124548	8123551	190397	520243	57.7004	78	26690	9499	0.610432	12.8527	0	614	0.854251	d__Bacteria;p__Proteobacteria;c__Gammaproteobacteria;o__Burkholderiales;f__SG8-39;g__SZAS-79;s__	4.04774e+06	d__Bacteria;p__Proteobacteria;c__Gammaproteobacteria;o__Burkholderiales;f__SG8-39;g__SZAS-79;s__	GCF_001423585.1	86.8259	0.04	Presence
SLM_LV1_30a-I07	>3.0 um	SAMN40274732	JBCKLL000000000	8935155	8449087	8439066	8439002	685057	2013134	57.6011	166	73855	24697	0.625765	24.1379	0	2233	0.880997	d__Bacteria;p__Proteobacteria;c__Gammaproteobacteria;o__Burkholderiales;f__SG8-39;g__SZAS-79;s__	8.34013e+06	d__Bacteria;p__Proteobacteria;c__Gammaproteobacteria;o__Burkholderiales;f__SG8-39;g__SZAS-79;s__	GCF_000964405.1	85.561	0	Presence
SLM_LV1_0208-M16	0.2~0.8 um	SAMN40274733	JBCKLM000000000	8956854	8499552	8492695	8492690	768865	2218921	58.4795	253	73583	13231	0.626759	43.2602	0	2427	0.885398	d__Bacteria;p__Proteobacteria;c__Gammaproteobacteria;o__Burkholderiales;f__SG8-39;g__SZAS-79;s__	5.12924e+06	d__Bacteria;p__Proteobacteria;c__Gammaproteobacteria;o__Burkholderiales;f__SG8-39;g__SZAS-79;s__	GCA_018241645.1	80.3127	0.36	Absence
SLM_LV1_0208-K21	0.2~0.8 um	SAMN40274734	JBCKLN000000000	7757101	7318919	7314337	7314261	562291	1611934	57.0117	219	45126	10360	0.626689	33.6207	0	1760	0.895565	d__Bacteria;p__Proteobacteria;c__Gammaproteobacteria;o__Burkholderiales;f__SG8-39;g__SZAS-79;s__	4.79447e+06	d__Bacteria;p__Proteobacteria;c__Gammaproteobacteria;o__Burkholderiales;f__SG8-39;g__SZAS-79;s__	GCA_018241645.1	80.1901	0.38	Absence
SLM_LV1_0208-I09	0.2~0.8 um	SAMN40274735	JBCKLO000000000	10077889	9546608	9489201	9489139	379198	1005161	62.6935	129	44756	11965	0.62234	18.8784	0	1120	0.885436	d__Bacteria;p__Proteobacteria;c__Gammaproteobacteria;o__Burkholderiales;f__SG8-39;g__SZAS-79;s__	5.32441e+06	d__Bacteria;p__Proteobacteria;c__Gammaproteobacteria;o__Burkholderiales;f__SG8-39;g__SZAS-79;s__	GCA_003694205.1	82.1368	0.01	Absence
SLM_LV1_0208-O20	0.2~0.8 um	SAMN40274736	JBCKLP000000000	9904932	9365636	9362570	9362508	1036216	2900219	60.411	343	69120	12782	0.597496	59.267	1.05473	3106	0.865762	d__Bacteria;p__Proteobacteria;c__Gammaproteobacteria;o__Burkholderiales;f__SG8-39;g__2-02-FULL-62-17;s__	4.89348e+06	d__Bacteria;p__Proteobacteria;c__Gammaproteobacteria;o__Burkholderiales;f__SG8-39;g__2-02-FULL-62-17;s__	GCF_001028625.1	85.3288	0	Presence
SLM_MC1B_02-A11	0~2 cm	SAMN40274737	JBCKLQ000000000	7542435	7107468	7104402	7104388	1099921	3226238	59.1705	267	96154	20375	0.598831	54.586	1.39857	3370	0.873306	d__Bacteria;p__Proteobacteria;c__Gammaproteobacteria;o__Burkholderiales;f__SG8-39;g__2-02-FULL-62-17;s__	5.91038e+06	d__Bacteria;p__Proteobacteria;c__Gammaproteobacteria;o__Burkholderiales;f__SG8-39;g__2-02-FULL-62-17;s__	GCA_016757515.1	84.4997	0.01	Presence
SLM_MC1B_24-B06	2~4 cm	SAMN40274738	JBCKLR000000000	7724489	7305419	7296875	7296841	638244	1971160	55.2601	162	61639	19456	0.622183	35.94	0.0278784	2068	0.877407	d__Bacteria;p__Proteobacteria;c__Gammaproteobacteria;o__Burkholderiales;f__SG8-39;g__2-12-FULL-64-23;s__	5.48459e+06	d__Bacteria;p__Proteobacteria;c__Gammaproteobacteria;o__Burkholderiales;f__SG8-39;g__2-12-FULL-64-23;s__	GCA_016234705.1	86.5004	0.45	Presence
SLM_LV1_30a-G17	>3.0 um	SAMN40274739	JBCKLS000000000	7166655	6767760	6761319	6760410	389004	1113353	59.9023	106	61854	15401	0.623548	13.8204	0	1288	0.858253	d__Bacteria;p__Proteobacteria;c__Gammaproteobacteria;o__Burkholderiales;f__SG8-41;g__;s__	8.05586e+06	d__Bacteria;p__Proteobacteria;c__Gammaproteobacteria;o__Burkholderiales;f__SG8-41;g__;s__	GCA_900320815.1	90.5076	0.01	Presence
SLM_LV1_0830-B07	0.8~3.0 um	SAMN40274740	JBCKLT000000000	11767457	11171122	11163785	11163734	522894	1454415	59.04	149	40909	16337	0.62855	34.4828	0	1654	0.85845	d__Bacteria;p__Proteobacteria;c__Gammaproteobacteria;o__Burkholderiales;f__SG8-41;g__;s__	4.2178e+06	d__Bacteria;p__Proteobacteria;c__Gammaproteobacteria;o__Burkholderiales;f__SG8-41;g__;s__	GCF_004343505.1	83.2597	0	Absence
SLM_LV1_30a-B13	>3.0 um	SAMN40274741	JBCKLU000000000	10574243	9969067	9944227	9944204	331816	900050	61.02	127	29427	9813	0.627877	13.412	0.526593	1009	0.863304	d__Bacteria;p__Proteobacteria;c__Gammaproteobacteria;o__Burkholderiales;f__SG8-41;g__;s__	6.71078e+06	d__Bacteria;p__Proteobacteria;c__Gammaproteobacteria;o__Burkholderiales;f__SG8-41;g__;s__	GCA_001312005.1	89.4199	0	Presence
SLM_LV1_0830-E13	0.8~3.0 um	SAMN40274742	JBCKLV000000000	8551358	7962293	7957334	7945978	370952	1033364	59.8047	139	32906	10619	0.62399	10.5016	0	1192	0.863088	d__Bacteria;p__Proteobacteria;c__Gammaproteobacteria;o__Burkholderiales;f__SG8-41;g__;s__	9.84009e+06	d__Bacteria;p__Proteobacteria;c__Gammaproteobacteria;o__Burkholderiales;f__SG8-41;g__;s__	GCA_017437605.1	78.7425	0.01	Absence
SLM_LV1_0208-M05	0.2~0.8 um	SAMN40274743	JBCKLW000000000	10238862	9629897	9621686	9621666	764466	2176515	60.8743	184	79299	18459	0.626862	42.9879	1.01557	2426	0.871851	d__Bacteria;p__Proteobacteria;c__Gammaproteobacteria;o__Burkholderiales;f__SG8-41;g__;s__	5.06309e+06	d__Bacteria;p__Proteobacteria;c__Gammaproteobacteria;o__Burkholderiales;f__SG8-41;g__;s__	GCA_016783675.1	80.376	0.01	Absence
SLM_LV1_30a-D11	>3.0 um	SAMN40274744	JBCKLX000000000	10466491	9891357	9886544	9886541	521912	1429927	59.5659	200	36801	8578	0.595177	27.4532	2.39755	1559	0.865002	d__Bacteria;p__Proteobacteria;c__Gammaproteobacteria;o__Burkholderiales;f__SG8-41;g__Ga0077527;s__	5.2086e+06	d__Bacteria;p__Proteobacteria;c__Gammaproteobacteria;o__Burkholderiales;f__SG8-41;g__Ga0077527;s__	GCA_011362725.1	84.2896	0	Absence
SLM_LV1_0830-P13	0.8~3.0 um	SAMN40274745	JBCKLY000000000	9214666	8678071	8670263	8670216	574619	1511081	64.827	170	37658	13745	0.600528	28.9692	0.473934	1604	0.880424	d__Bacteria;p__Proteobacteria;c__Gammaproteobacteria;o__Burkholderiales;f__SG8-41;g__Ga0077527;s__	5.21617e+06	d__Bacteria;p__Proteobacteria;c__Gammaproteobacteria;o__Burkholderiales;f__SG8-41;g__Ga0077527;s__	GCA_003820645.1	81.6073	0.48	Absence
SLM_MC1B_02-A10	0~2 cm	SAMN40274746	JBCKLZ000000000	9349761	8524244	8517892	8517840	459260	1356619	57.8641	133	53368	14292	0.575595	30.4899	1.26382	1435	0.893877	d__Bacteria;p__Proteobacteria;c__Gammaproteobacteria;o__Burkholderiales;f__SG8-41;g__Ga0077527;s__	4.4494e+06	d__Bacteria;p__Proteobacteria;c__Gammaproteobacteria;o__Burkholderiales;f__SG8-41;g__Ga0077527;s__	GCF_001556865.1	82.2141	0	Presence
SLM_MC1B_02-C05	0~2 cm	SAMN40274747	JBCKMA000000000	9527624	8958777	8942178	8942161	709565	1893492	66.2858	95	110894	36235	0.645493	52.7408	0.974197	2019	0.903095	d__Bacteria;p__Proteobacteria;c__Gammaproteobacteria;o__Burkholderiales;f__SG8-41;g__SG8-41;s__	3.59018e+06	d__Bacteria;p__Proteobacteria;c__Gammaproteobacteria;o__Burkholderiales;f__SG8-41;g__SG8-41;s__	GCA_016177355.1	87.4208	0.43	Presence
SLM_MC1B_810-C23	8~10 cm	SAMN40274748	JBCKMB000000000	8970875	8356638	8321421	8321338	488154	1451834	57.6124	119	61071	21101	0.642706	44.2173	0.947867	1551	0.89822	d__Bacteria;p__Proteobacteria;c__Gammaproteobacteria;o__Burkholderiales;f__SG8-41;g__SG8-41;s__	3.28341e+06	d__Bacteria;p__Proteobacteria;c__Gammaproteobacteria;o__Burkholderiales;f__SG8-41;g__SG8-41;s__	GCA_016177355.1	87.5049	0.42	Presence
SLM_MC1B_02-G16	0~2 cm	SAMN40274749	JBCKMC000000000	11122842	10500335	10491558	10491550	640727	1696982	65.9107	128	50335	24567	0.629701	24.3173	0.236967	1802	0.855977	d__Bacteria;p__Proteobacteria;c__Gammaproteobacteria;o__Burkholderiales;f__SG8-41;g__SG8-41;s__	6.97849e+06	d__Bacteria;p__Proteobacteria;c__Gammaproteobacteria;o__Burkholderiales;f__SG8-41;g__;s__	GCA_017394205.1	82.1112	0.01	Absence
SLM_LV1_0830-O13	0.8~3.0 um	SAMN40274750	JBCKMD000000000	8427437	7855982	7850424	7850411	222311	582142	61.8789	96	17197	7624	0.601209	12.0862	0.947867	675	0.862812	d__Bacteria;p__Proteobacteria;c__Gammaproteobacteria;o__Burkholderiales;f__SG8-41;g__;s__	4.81656e+06	d__Bacteria;p__Proteobacteria;c__Gammaproteobacteria;o__Burkholderiales;f__SG8-41;g__;s__	GCA_019187185.1	82.2443	0.01	Absence
SLM_LV1_0830-L05	0.8~3.0 um	SAMN40274751	JBCKME000000000	11558151	10770857	10759512	10759508	352092	926056	62.6936	130	24482	9049	0.597394	15.8307	0	1046	0.85862	d__Bacteria;p__Proteobacteria;c__Gammaproteobacteria;o__Burkholderiales;f__SG8-41;g__;s__	5.84974e+06	d__Bacteria;p__Proteobacteria;c__Gammaproteobacteria;o__Burkholderiales;f__SG8-41;g__;s__	GCF_003958625.1	85.9802	0	Presence
SLM_MC1B_02-A15	0~2 cm	SAMN40274752	JBCKMF000000000	7141658	6695669	6689244	6689225	754239	2286969	57.9333	228	67479	15522	0.595031	42.8178	1.23279	2444	0.865886	d__Bacteria;p__Proteobacteria;c__Gammaproteobacteria;o__Burkholderiales;f__SG8-41;g__;s__	5.34116e+06	d__Bacteria;p__Proteobacteria;c__Gammaproteobacteria;o__Burkholderiales;f__SG8-41;g__;s__	GCA_016185345.1	81.2767	0.01	Presence
SLM_MC1B_02-C20	0~2 cm	SAMN40274753	JBCKMG000000000	7308389	6819906	6816404	6816384	623123	1983356	54.3036	180	53998	18900	0.598092	58.6207	0	2087	0.870588	d__Bacteria;p__Proteobacteria;c__Gammaproteobacteria;o__Burkholderiales;f__SG8-41;g__;s__	3.38337e+06	d__Bacteria;p__Proteobacteria;c__Gammaproteobacteria;o__Burkholderiales;f__SG8-41;g__;s__	GCF_000372805.1	84.2354	0.01	Presence
SLM_MC1B_02-C18	0~2 cm	SAMN40274754	JBCKMH000000000	10016586	9380914	9377167	9377149	267312	821334	55.9396	113	32808	8629	0.602365	16.0742	0	906	0.868074	d__Bacteria;p__Proteobacteria;c__Gammaproteobacteria;o__Burkholderiales;f__SG8-41;g__;s__	5.10963e+06	d__Bacteria;p__Proteobacteria;c__Gammaproteobacteria;o__Burkholderiales;f__SG8-41;g__;s__	GCA_017880745.1	79.259	0.1	Absence
SLM_MC1B_810-B21	8~10 cm	SAMN40274755	JBCKMI000000000	8851103	8371377	8362076	8362057	639665	1846900	60.4714	117	93679	31054	0.618896	47.9294	0	1902	0.888265	d__Bacteria;p__Proteobacteria;c__Gammaproteobacteria;o__Burkholderiales;f__SG8-41;g__PALSA-1004;s__	3.85338e+06	d__Bacteria;p__Proteobacteria;c__Gammaproteobacteria;o__Burkholderiales;f__SG8-41;g__PALSA-1004;s__	GCA_900540425.1	85.1701	0.01	Presence
SLM_MC1B_810-C08	8~10 cm	SAMN40274756	JBCKMJ000000000	7726687	7221852	7216125	7216072	330949	938882	63.362	83	67561	16662	0.613996	8.62069	0	994	0.885078	d__Bacteria;p__Proteobacteria;c__Gammaproteobacteria;o__Burkholderiales;f__SG8-41;g__PALSA-1004;s__	1.0891e+07	d__Bacteria;p__Proteobacteria;c__Gammaproteobacteria;o__Burkholderiales;f__SG8-41;g__PALSA-1004;s__	GCA_003153455.1	83.5798	0.59	Absence
SLM_MC1B_02-D16	0~2 cm	SAMN40274757	JBCKMK000000000	10295719	9668932	9512150	9512135	456884	1427416	55.084	139	49874	17115	0.604687	29.3871	0.947867	1631	0.871751	d__Bacteria;p__Proteobacteria;c__Gammaproteobacteria;o__Burkholderiales;f__SG8-41;g__PALSA-1004;s__	4.8573e+06	d__Bacteria;p__Proteobacteria;c__Gammaproteobacteria;o__Burkholderiales;f__SG8-41;g__PALSA-1004;s__	GCA_905182555.1	85.7302	0.01	Presence
SLM_MC1B_02-F16	0~2 cm	SAMN40274758	JBCKML000000000	7997190	7493732	7485301	7485286	184390	459377	68.8011	54	41528	11185	0.608446	18.1034	0	520	0.886503	d__Bacteria;p__Proteobacteria;c__Gammaproteobacteria;o__Burkholderiales;f__SG8-41;g__PALSA-1004;s__	2.53751e+06	d__Bacteria;p__Proteobacteria;c__Gammaproteobacteria;o__Burkholderiales;f__SG8-41;g__PALSA-1004;s__	GCA_003153455.1	84.0421	0.48	Absence
SLM_LV1_30a-C14	>3.0 um	SAMN40274759	JBCKMM000000000	10456772	9790835	9787696	9787662	197251	491906	64.6741	76	23455	8830	0.61243	14.036	0	552	0.869758	d__Bacteria;p__Proteobacteria;c__Gammaproteobacteria;o__Burkholderiales;f__SG8-41;g__PALSA-1004;s__	3.50461e+06	d__Bacteria;p__Proteobacteria;c__Gammaproteobacteria;o__Burkholderiales;f__SG8-41;g__PALSA-1004;s__	GCA_003153455.1	83.8323	0.61	Presence
SLM_LV1_0208-J22	0.2~0.8 um	SAMN40274760	JBCKMN000000000	10754340	10214723	10206770	10206673	350165	830658	68.3205	109	60173	10181	0.617927	25.7138	0	973	0.889716	d__Bacteria;p__Proteobacteria;c__Gammaproteobacteria;o__Burkholderiales;f__SG8-41;g__PALSA-1004;s__	3.2304e+06	d__Bacteria;p__Proteobacteria;c__Gammaproteobacteria;o__Burkholderiales;f__SG8-41;g__PALSA-1004;s__	GCA_003153455.1	83.774	0.64	Absence
SLM_LV1_0830-G03	0.8~3.0 um	SAMN40274761	JBCKMO000000000	9713206	9145189	9141738	9141662	196437	500350	66.2053	76	29767	9014	0.610477	7.07129	0.0364564	568	0.903084	d__Bacteria;p__Proteobacteria;c__Gammaproteobacteria;o__Burkholderiales;f__SG8-41;g__PALSA-1004;s__	7.07579e+06	d__Bacteria;p__Proteobacteria;c__Gammaproteobacteria;o__Burkholderiales;f__SG8-41;g__PALSA-1004;s__	GCA_003153455.1	83.4786	0.58	Absence
SLM_MC1B_02-D08	0~2 cm	SAMN40274762	JBCKMP000000000	9707500	9094219	9087323	9087267	424973	1210812	61.4768	83	99375	27543	0.61787	34.0732	0	1276	0.888898	d__Bacteria;p__Proteobacteria;c__Gammaproteobacteria;o__Burkholderiales;f__SG8-41;g__PALSA-1004;s__	3.55356e+06	d__Bacteria;p__Proteobacteria;c__Gammaproteobacteria;o__Burkholderiales;f__SG8-41;g__PALSA-1004;s__	GCF_002844235.1	85.953	0	Absence
SLM_MC1B_02-A19	0~2 cm	SAMN40274763	JBCKMQ000000000	6828484	6377727	6373736	6373727	667619	2125645	53.8937	207	57607	18872	0.618982	28.8755	1.4218	2262	0.875673	d__Bacteria;p__Proteobacteria;c__Gammaproteobacteria;o__Burkholderiales;f__SG8-41;g__PALSA-1004;s__	7.36142e+06	d__Bacteria;p__Proteobacteria;c__Gammaproteobacteria;o__Burkholderiales;f__SG8-41;g__PALSA-1004;s__	GCA_016192835.1	84.4599	0.48	Absence
SLM_LV1_0208-F13	0.2~0.8 um	SAMN40274764	JBCKMR000000000	8263715	7739334	7720345	7720210	504604	1398564	59.0177	194	45308	10819	0.61264	19.9315	0.0592417	1510	0.877356	d__Bacteria;p__Proteobacteria;c__Gammaproteobacteria;o__Burkholderiales;f__SG8-41;g__PALSA-1004;s__	7.01684e+06	d__Bacteria;p__Proteobacteria;c__Gammaproteobacteria;o__Burkholderiales;f__SG8-41;g__PALSA-1004;s__	GCA_016192835.1	84.6754	0.43	Absence
SLM_MC1B_02-B08	0~2 cm	SAMN40274765	JBCKMS000000000	7510404	7130149	7125530	7125522	876994	2434406	61.3723	228	84009	20148	0.620963	38.2759	0	2573	0.873364	d__Bacteria;p__Proteobacteria;c__Gammaproteobacteria;o__Burkholderiales;f__SG8-41;g__PALSA-1004;s__	6.36016e+06	d__Bacteria;p__Proteobacteria;c__Gammaproteobacteria;o__Burkholderiales;f__SG8-41;g__PALSA-1004;s__	GCA_905339405.1	88.8015	0.01	Presence
SLM_LV1_0208-O10	0.2~0.8 um	SAMN40274766	JBCKMT000000000	8932577	8454593	8450868	8450668	608602	1848583	55.1358	211	44417	13312	0.616814	29.8955	0	1965	0.878765	d__Bacteria;p__Proteobacteria;c__Gammaproteobacteria;o__Burkholderiales;f__SG8-41;g__PALSA-1004;s__	6.18348e+06	d__Bacteria;p__Proteobacteria;c__Gammaproteobacteria;o__Burkholderiales;f__SG8-41;g__PALSA-1004;s__	GCA_016192835.1	85.1839	0.48	Absence
SLM_MC1B_24-P05	2~4 cm	SAMN40274767	JBCKMU000000000	9810492	9322690	9314639	9314551	1019766	3059825	56.7811	308	78509	15143	0.615375	47.0588	0.375197	3179	0.871464	d__Bacteria;p__Proteobacteria;c__Gammaproteobacteria;o__Burkholderiales;f__SG8-41;g__PALSA-1004;s__	6.50213e+06	d__Bacteria;p__Proteobacteria;c__Gammaproteobacteria;o__Burkholderiales;f__SG8-41;g__PALSA-1004;s__	GCA_016192835.1	85.297	0.46	Presence
SLM_MC1B_68-P16	6~8 cm	SAMN40274768	JBCKMV000000000	9998513	9487340	9471708	9471693	1034699	3348528	52.5668	320	82553	17067	0.616087	45.6227	0.473934	3515	0.874597	d__Bacteria;p__Proteobacteria;c__Gammaproteobacteria;o__Burkholderiales;f__SG8-41;g__PALSA-1004;s__	7.33961e+06	d__Bacteria;p__Proteobacteria;c__Gammaproteobacteria;o__Burkholderiales;f__SG8-41;g__PALSA-1004;s__	GCA_016192835.1	84.8867	0.44	Presence
SLM_LV1_0208-B20	0.2~0.8 um	SAMN40274769	JBCKMW000000000	9773087	9163719	9155266	9155250	503792	1539534	54.2125	163	58794	17430	0.614344	31.7999	0.7109	1643	0.872121	d__Bacteria;p__Proteobacteria;c__Gammaproteobacteria;o__Burkholderiales;f__SG8-41;g__PALSA-1004;s__	4.84132e+06	d__Bacteria;p__Proteobacteria;c__Gammaproteobacteria;o__Burkholderiales;f__SG8-41;g__PALSA-1004;s__	GCF_014652275.1	86.6491	0	Presence
SLM_LV1_30a-D18	>3.0 um	SAMN40274770	JBCKMX000000000	10214248	9521842	9520004	9520001	321493	832364	63.5705	88	37216	13687	0.526054	48.1581	1.42857	933	0.863942	d__Bacteria;p__Proteobacteria;c__Gammaproteobacteria;o__Burkholderiales;f__Nitrosomonadaceae;g__;s__	1.7284e+06	d__Bacteria;p__Proteobacteria;c__Gammaproteobacteria;o__Burkholderiales;f__Nitrosomonadaceae;g__;s__	GCF_000264295.1	81.8118	0.01	Presence
SLM_MC1B_24-B05	2~4 cm	SAMN40274771	JBCKMY000000000	8231522	7841246	7837351	7837328	405512	1167129	61.3504	90	57858	24519	0.581422	39.4275	0.0667557	1193	0.909318	d__Bacteria;p__Proteobacteria;c__Gammaproteobacteria;o__Burkholderiales;f__Burkholderiaceae;g__Polaromonas;s__	2.96019e+06	d__Bacteria;p__Proteobacteria;c__Gammaproteobacteria;o__Burkholderiales;f__Burkholderiaceae;g__Polaromonas;s__	GCA_002278925.1	80.2249	0.49	Absence
SLM_MC1B_24-L02	2~4 cm	SAMN40274772	JBCKMZ000000000	7257759	6778093	6774631	6774463	651303	1837642	63.6516	130	81130	24664	0.581093	66.9022	0.154372	1818	0.904018	d__Bacteria;p__Proteobacteria;c__Gammaproteobacteria;o__Burkholderiales;f__Burkholderiaceae;g__Polaromonas;s__	2.74676e+06	d__Bacteria;p__Proteobacteria;c__Gammaproteobacteria;o__Burkholderiales;f__Burkholderiaceae;g__Polaromonas;s__	GCA_016712355.1	80.2687	0	Absence
SLM_MC1B_68-A04	6~8 cm	SAMN40274773	JBCKNA000000000	11257360	10741372	10737911	10737876	305846	857527	61.0993	104	34435	11653	0.578166	29.0792	0	906	0.893472	d__Bacteria;p__Proteobacteria;c__Gammaproteobacteria;o__Burkholderiales;f__Burkholderiaceae;g__Polaromonas;s__	2.94894e+06	d__Bacteria;p__Proteobacteria;c__Gammaproteobacteria;o__Burkholderiales;f__Burkholderiaceae;g__Polaromonas;s__	GCF_008831125.1	82.9714	0	Presence
SLM_MC1B_24-I19	2~4 cm	SAMN40274774	JBCKNB000000000	9426888	8848284	8845843	8845567	411788	1170765	63.0763	77	64329	24378	0.576408	26.0188	0	1196	0.901292	d__Bacteria;p__Proteobacteria;c__Gammaproteobacteria;o__Burkholderiales;f__Burkholderiaceae;g__Polaromonas;s__	4.49969e+06	d__Bacteria;p__Proteobacteria;c__Gammaproteobacteria;o__Burkholderiales;f__Burkholderiaceae;g__Polaromonas;s__	GCA_000333335.1	84.4175	0	Presence
SLM_MC1B_02-M21	0~2 cm	SAMN40274775	JBCKNC000000000	9193797	8728426	8724224	8724216	890282	2574986	60.7128	184	84033	23388	0.584331	61.4586	0.46729	2626	0.875543	d__Bacteria;p__Proteobacteria;c__Gammaproteobacteria;o__Burkholderiales;f__Burkholderiaceae;g__Polaromonas;s__	4.18979e+06	d__Bacteria;p__Proteobacteria;c__Gammaproteobacteria;o__Burkholderiales;f__Burkholderiaceae;g__Polaromonas;s__	GCF_002379085.1	80.4812	0.41	Absence
SLM_MC1B_24-G14	2~4 cm	SAMN40274776	JBCKND000000000	8034554	7487629	7485111	7485085	545663	1862322	51.0601	180	90716	15587	0.584106	43.9272	0.46729	1930	0.873251	d__Bacteria;p__Proteobacteria;c__Gammaproteobacteria;o__Burkholderiales;f__Burkholderiaceae;g__Polaromonas;s__	4.23957e+06	d__Bacteria;p__Proteobacteria;c__Gammaproteobacteria;o__Burkholderiales;f__Burkholderiaceae;g__Polaromonas;s__	GCF_011039135.1	84.8853	0.01	Presence
SLM_LV1_30a-L03	>3.0 um	SAMN40274777	JBCKNE000000000	7089945	6614381	6611255	6611181	458949	1289442	57.9147	176	33011	10065	0.574867	33.0062	0.124611	1398	0.890095	d__Bacteria;p__Proteobacteria;c__Gammaproteobacteria;o__Burkholderiales;f__Burkholderiaceae;g__Polaromonas;s__	3.90666e+06	d__Bacteria;p__Proteobacteria;c__Gammaproteobacteria;o__Burkholderiales;f__Burkholderiaceae;g__Polaromonas;s__	GCF_002379085.1	80.214	0.4	Absence
SLM_MC1B_02-E07	0~2 cm	SAMN40274778	JBCKNF000000000	7657136	7134631	7131422	7131396	608401	1785983	61.2731	60	136735	68482	0.578805	71.1839	0.527648	1781	0.918349	d__Bacteria;p__Proteobacteria;c__Gammaproteobacteria;o__Burkholderiales;f__Burkholderiaceae;g__Polaromonas;s__	2.50897e+06	d__Bacteria;p__Proteobacteria;c__Gammaproteobacteria;o__Burkholderiales;f__Burkholderiaceae;g__Polaromonas;s__	GCF_002379085.1	80.672	0.49	Absence
SLM_LV1_0208-G22	0.2~0.8 um	SAMN40274779	JBCKNG000000000	9493308	8930359	8921290	8921241	284657	774028	61.1195	102	32539	9522	0.579267	29.8921	0.46729	848	0.90808	d__Bacteria;p__Proteobacteria;c__Gammaproteobacteria;o__Burkholderiales;f__Burkholderiaceae;g__Polaromonas;s__	2.58941e+06	d__Bacteria;p__Proteobacteria;c__Gammaproteobacteria;o__Burkholderiales;f__Burkholderiaceae;g__Polaromonas;s__	GCF_000820045.1	86.6001	0	Presence
SLM_LV1_30a-E16	>3.0 um	SAMN40274780	JBCKNH000000000	8505629	7950234	7913969	7913957	272792	758939	64.692	69	62000	16861	0.578008	20.2417	0.996885	783	0.880955	d__Bacteria;p__Proteobacteria;c__Gammaproteobacteria;o__Burkholderiales;f__Burkholderiaceae;g__Polaromonas;s__	3.74938e+06	d__Bacteria;p__Proteobacteria;c__Gammaproteobacteria;o__Burkholderiales;f__Burkholderiaceae;g__Polaromonas;s__	GCF_002379085.1	80.4551	0.46	Presence
SLM_LV1_30a-G02	>3.0 um	SAMN40274781	JBCKNI000000000	8433307	7910050	7905967	7905963	289890	769692	60.892	107	30188	10296	0.575474	18.9655	0	851	0.862933	d__Bacteria;p__Proteobacteria;c__Gammaproteobacteria;o__Burkholderiales;f__Burkholderiaceae;g__Polaromonas;s__	4.05838e+06	d__Bacteria;p__Proteobacteria;c__Gammaproteobacteria;o__Burkholderiales;f__Burkholderiaceae;g__Polaromonas;s__	GCA_002364755.1	80.1112	0.01	Absence
SLM_MC1B_24-G05	2~4 cm	SAMN40274782	JBCKNJ000000000	7428974	7094614	7085769	7085743	666720	1904796	65.3917	103	98816	31343	0.582728	65.2547	2.80374	1888	0.894776	d__Bacteria;p__Proteobacteria;c__Gammaproteobacteria;o__Burkholderiales;f__Burkholderiaceae;g__Polaromonas;s__	2.91902e+06	d__Bacteria;p__Proteobacteria;c__Gammaproteobacteria;o__Burkholderiales;f__Burkholderiaceae;g__Polaromonas;s__	GCF_002379085.1	80.7592	0.47	Absence
SLM_LV1_0208-F05	0.2~0.8 um	SAMN40274783	JBCKNK000000000	8584981	8040725	8011227	8011189	311558	790455	62.3093	118	24683	8353	0.579551	21.4025	0.600801	914	0.865397	d__Bacteria;p__Proteobacteria;c__Gammaproteobacteria;o__Burkholderiales;f__Burkholderiaceae;g__Polaromonas;s__	3.69328e+06	d__Bacteria;p__Proteobacteria;c__Gammaproteobacteria;o__Burkholderiales;f__Burkholderiaceae;g__Polaromonas;s__	GCF_002379085.1	80.7241	0.37	Absence
SLM_LV1_30a-G10	>3.0 um	SAMN40274784	JBCKNL000000000	11315922	10811102	10805622	10805618	298088	902521	54.704	105	36796	12134	0.571567	28.0281	0.525701	1000	0.882397	d__Bacteria;p__Proteobacteria;c__Gammaproteobacteria;o__Burkholderiales;f__Burkholderiaceae;g__Polaromonas;s__	3.22006e+06	d__Bacteria;p__Proteobacteria;c__Gammaproteobacteria;o__Burkholderiales;f__Burkholderiaceae;g__Polaromonas;s__	GCA_014879765.1	81.6695	0.01	Presence
SLM_MC1B_24-A05	2~4 cm	SAMN40274785	JBCKNM000000000	7654427	7247246	7242357	7242323	669600	1882310	64.4385	141	116876	21241	0.578575	60.4887	0.0913499	1876	0.893056	d__Bacteria;p__Proteobacteria;c__Gammaproteobacteria;o__Burkholderiales;f__Burkholderiaceae;g__Polaromonas;s__	3.11184e+06	d__Bacteria;p__Proteobacteria;c__Gammaproteobacteria;o__Burkholderiales;f__Burkholderiaceae;g__Polaromonas;s__	GCF_014647255.1	84.6617	0	Presence
SLM_LV1_0830-A07	0.8~3.0 um	SAMN40274786	JBCKNN000000000	11000133	10144452	10135408	10135135	607470	1544199	64.4473	172	43577	12987	0.580237	43.6083	0.46729	1678	0.881887	d__Bacteria;p__Proteobacteria;c__Gammaproteobacteria;o__Burkholderiales;f__Burkholderiaceae;g__Polaromonas;s__	3.54107e+06	d__Bacteria;p__Proteobacteria;c__Gammaproteobacteria;o__Burkholderiales;f__Burkholderiaceae;g__Polaromonas;s__	GCF_003143555.1	87.4314	0	Presence
SLM_LV1_0208-P11	0.2~0.8 um	SAMN40274787	JBCKNO000000000	9542491	8919865	8916654	8916525	524748	1380442	61.5126	212	32580	8500	0.583662	20.6897	0	1431	0.881673	d__Bacteria;p__Proteobacteria;c__Gammaproteobacteria;o__Burkholderiales;f__Burkholderiaceae;g__Polaromonas;s__	6.67214e+06	d__Bacteria;p__Proteobacteria;c__Gammaproteobacteria;o__Burkholderiales;f__Burkholderiaceae;g__Polaromonas;s__	GCA_001785195.1	82.1146	0.01	Absence
SLM_LV1_30a-G19	>3.0 um	SAMN40274788	JBCKNP000000000	11140424	10560622	10556391	10556389	390121	1100782	63.453	117	70736	12840	0.5801	33.0874	1.63329	1131	0.889936	d__Bacteria;p__Proteobacteria;c__Gammaproteobacteria;o__Burkholderiales;f__Burkholderiaceae;g__Polaromonas;s__	3.32689e+06	d__Bacteria;p__Proteobacteria;c__Gammaproteobacteria;o__Burkholderiales;f__Burkholderiaceae;g__Polaromonas;s__	GCF_002379085.1	81.0053	0.45	Absence
SLM_LV1_30a-G08	>3.0 um	SAMN40274789	JBCKNQ000000000	8199304	7755294	7749592	7749577	257256	612371	73.4099	67	65254	12378	0.577446	22.7122	1.40187	650	0.883193	d__Bacteria;p__Proteobacteria;c__Gammaproteobacteria;o__Burkholderiales;f__Burkholderiaceae;g__Polaromonas;s__	2.69622e+06	d__Bacteria;p__Proteobacteria;c__Gammaproteobacteria;o__Burkholderiales;f__Burkholderiaceae;g__Polaromonas;s__	GCF_002379085.1	80.7222	0.55	Absence
SLM_LV1_BS-L03	BulkSediment	SAMN40274790	JBCKNR000000000	7102247	6716831	6713211	6713184	655976	2240966	50.8868	203	74171	18286	0.582565	50.1616	0.29595	2372	0.881059	d__Bacteria;p__Proteobacteria;c__Gammaproteobacteria;o__Burkholderiales;f__Burkholderiaceae;g__Polaromonas;s__	4.46749e+06	d__Bacteria;p__Proteobacteria;c__Gammaproteobacteria;o__Burkholderiales;f__Burkholderiaceae;g__Polaromonas;s__	GCF_002379085.1	80.2812	0.35	Absence
SLM_LV1_30a-A01	>3.0 um	SAMN40274791	JBCKNS000000000	9606771	9137934	9128936	9128725	570125	1397856	68.7143	180	37479	10373	0.579782	50.8109	0.46729	1509	0.877708	d__Bacteria;p__Proteobacteria;c__Gammaproteobacteria;o__Burkholderiales;f__Burkholderiaceae;g__Polaromonas;s__	2.75109e+06	d__Bacteria;p__Proteobacteria;c__Gammaproteobacteria;o__Burkholderiales;f__Burkholderiaceae;g__Polaromonas;s__	GCF_004216575.1	79.8322	0	Absence
SLM_LV1_30a-J13	>3.0 um	SAMN40274792	JBCKNT000000000	6800926	6424071	6421586	6421564	581759	2078854	47.9711	254	41723	11908	0.579377	40.5079	0	2268	0.870855	d__Bacteria;p__Proteobacteria;c__Gammaproteobacteria;o__Burkholderiales;f__Burkholderiaceae;g__Polaromonas;s__	5.13198e+06	d__Bacteria;p__Proteobacteria;c__Gammaproteobacteria;o__Burkholderiales;f__Burkholderiaceae;g__Polaromonas;s__	GCA_017792345.1	86.1934	0.01	Presence
SLM_LV1_30a-N15	>3.0 um	SAMN40274793	JBCKNU000000000	11709594	11122550	11118352	11118352	249119	710563	61.2543	57	41573	16803	0.572498	21.2697	0	764	0.883891	d__Bacteria;p__Proteobacteria;c__Gammaproteobacteria;o__Burkholderiales;f__Burkholderiaceae;g__Polaromonas;s__	3.34072e+06	d__Bacteria;p__Proteobacteria;c__Gammaproteobacteria;o__Burkholderiales;f__Burkholderiaceae;g__Polaromonas;s__	GCF_014678725.1	82.5041	0.01	Presence
SLM_LV1_30a-C18	>3.0 um	SAMN40274794	JBCKNV000000000	7591132	7054399	7052673	7052645	272175	808516	58.5106	86	63207	13912	0.569729	18.3386	0	884	0.877733	d__Bacteria;p__Proteobacteria;c__Gammaproteobacteria;o__Burkholderiales;f__Burkholderiaceae;g__Polaromonas;s__	4.40883e+06	d__Bacteria;p__Proteobacteria;c__Gammaproteobacteria;o__Burkholderiales;f__Burkholderiaceae;g__Polaromonas;s__	GCF_001421785.1	83.4998	0.01	Presence
SLM_LV1_0830-K16	0.8~3.0 um	SAMN40274795	JBCKNW000000000	9234102	8702284	8698952	8698947	378087	996801	63.0831	137	26688	10443	0.573447	30.1864	1.42646	1173	0.890462	d__Bacteria;p__Proteobacteria;c__Gammaproteobacteria;o__Burkholderiales;f__Burkholderiaceae;g__Polaromonas;s__	3.30215e+06	d__Bacteria;p__Proteobacteria;c__Gammaproteobacteria;o__Burkholderiales;f__Burkholderiaceae;g__Polaromonas;s__	GCA_002813635.1	88.7031	0	Presence
SLM_LV1_0830-G19	0.8~3.0 um	SAMN40274796	JBCKNX000000000	10762907	10027947	10025614	10025393	155270	393378	67.5805	68	22380	7437	0.570418	4.16667	0	485	0.883761	d__Bacteria;p__Proteobacteria;c__Gammaproteobacteria;o__Burkholderiales;f__Burkholderiaceae;g__Polaromonas;s__	9.44107e+06	d__Bacteria;p__Proteobacteria;c__Gammaproteobacteria;o__Burkholderiales;f__Burkholderiaceae;g__Polaromonas;s__	GCF_002379095.1	80.9273	0.5	Absence
SLM_LV1_0830-F22	0.8~3.0 um	SAMN40274797	JBCKNY000000000	9474743	9010126	9006377	9006316	450148	1380736	56.9577	117	55515	19191	0.571802	41.3793	0	1541	0.885291	d__Bacteria;p__Proteobacteria;c__Gammaproteobacteria;o__Burkholderiales;f__Burkholderiaceae;g__Polaromonas;s__	3.33678e+06	d__Bacteria;p__Proteobacteria;c__Gammaproteobacteria;o__Burkholderiales;f__Burkholderiaceae;g__Polaromonas;s__	GCF_011039135.1	84.4954	0.01	Presence
SLM_LV1_BS-A14	BulkSediment	SAMN40274798	JBCKNZ000000000	9885751	9319840	9315047	9315030	236387	587193	69.0187	61	39045	18196	0.580009	22.4138	0	676	0.878398	d__Bacteria;p__Proteobacteria;c__Gammaproteobacteria;o__Burkholderiales;f__Burkholderiaceae;g__Polaromonas;s__	2.61978e+06	d__Bacteria;p__Proteobacteria;c__Gammaproteobacteria;o__Burkholderiales;f__Burkholderiaceae;g__Polaromonas;s__	GCA_013817205.1	80.3396	0.27	Absence
SLM_LV1_0830-M05	0.8~3.0 um	SAMN40274799	JBCKOA000000000	8908539	8406826	8403153	8403122	474414	1298606	61.7735	158	45333	11249	0.574438	27.9317	1.43302	1456	0.877443	d__Bacteria;p__Proteobacteria;c__Gammaproteobacteria;o__Burkholderiales;f__Burkholderiaceae;g__Polaromonas;s__	4.64921e+06	d__Bacteria;p__Proteobacteria;c__Gammaproteobacteria;o__Burkholderiales;f__Burkholderiaceae;g__Polaromonas;s__	GCF_018854025.1	88.0289	0	Presence
SLM_LV1_0830-L21	0.8~3.0 um	SAMN40274800	JBCKOB000000000	6782819	6369686	6366006	6365998	565241	1543687	64.0089	174	68102	12425	0.578356	43.0132	1.01246	1731	0.888681	d__Bacteria;p__Proteobacteria;c__Gammaproteobacteria;o__Burkholderiales;f__Burkholderiaceae;g__Polaromonas;s__	3.58887e+06	d__Bacteria;p__Proteobacteria;c__Gammaproteobacteria;o__Burkholderiales;f__Burkholderiaceae;g__Polaromonas;s__	GCA_003149375.1	87.7641	0	Presence
SLM_LV1_30a-D02	>3.0 um	SAMN40274801	JBCKOC000000000	9552285	9064263	9061065	9061059	406853	1290720	52.8498	145	52269	12785	0.579488	38.4025	0	1433	0.89113	d__Bacteria;p__Proteobacteria;c__Gammaproteobacteria;o__Burkholderiales;f__Burkholderiaceae;g__Polaromonas;s__	3.36103e+06	d__Bacteria;p__Proteobacteria;c__Gammaproteobacteria;o__Burkholderiales;f__Burkholderiaceae;g__Polaromonas;s__	GCA_014879855.1	80.947	0	Absence
SLM_LV1_0830-N23	0.8~3.0 um	SAMN40274802	JBCKOD000000000	6881327	6550424	6544526	6544350	281493	750486	64.0984	96	32938	11999	0.577466	16.343	0.46729	827	0.896114	d__Bacteria;p__Proteobacteria;c__Gammaproteobacteria;o__Burkholderiales;f__Burkholderiaceae;g__Polaromonas;s__	4.59209e+06	d__Bacteria;p__Proteobacteria;c__Gammaproteobacteria;o__Burkholderiales;f__Burkholderiaceae;g__Polaromonas;s__	GCF_002379095.1	80.3298	0.42	Absence
SLM_LV1_0208-L15	0.2~0.8 um	SAMN40274803	JBCKOE000000000	10354180	9730341	9727494	9727336	252957	664977	65.2824	88	40715	10730	0.570642	16.8414	0.0245942	774	0.87474	d__Bacteria;p__Proteobacteria;c__Gammaproteobacteria;o__Burkholderiales;f__Burkholderiaceae;g__Polaromonas;s__	3.94847e+06	d__Bacteria;p__Proteobacteria;c__Gammaproteobacteria;o__Burkholderiales;f__Burkholderiaceae;g__Polaromonas;s__	GCF_013464485.1	87.4314	0.01	Presence
SLM_LV1_0208-K08	0.2~0.8 um	SAMN40274804	JBCKOF000000000	11618649	10994167	10986759	10986708	297449	839228	58.2808	102	52787	11465	0.572338	29.3103	0	950	0.884279	d__Bacteria;p__Proteobacteria;c__Gammaproteobacteria;o__Burkholderiales;f__Burkholderiaceae;g__Polaromonas;s__	2.86325e+06	d__Bacteria;p__Proteobacteria;c__Gammaproteobacteria;o__Burkholderiales;f__Burkholderiaceae;g__Polaromonas;s__	GCF_018612915.1	86.6491	0.02	Presence
SLM_LV1_30a-B03	>3.0 um	SAMN40274805	JBCKOG000000000	7831401	7424220	7420880	7420876	468246	1255407	64.5735	141	45585	13848	0.583419	25.7837	0	1389	0.891872	d__Bacteria;p__Proteobacteria;c__Gammaproteobacteria;o__Burkholderiales;f__Burkholderiaceae;g__Polaromonas;s__	4.86899e+06	d__Bacteria;p__Proteobacteria;c__Gammaproteobacteria;o__Burkholderiales;f__Burkholderiaceae;g__Polaromonas;s__	GCF_002379085.1	80.4781	0.37	Absence
SLM_LV1_0830-N09	0.8~3.0 um	SAMN40274806	JBCKOH000000000	9924114	9298922	9296107	9296057	466390	1261521	60.7164	195	28062	8425	0.568371	36.9404	0.46729	1502	0.892606	d__Bacteria;p__Proteobacteria;c__Gammaproteobacteria;o__Burkholderiales;f__Burkholderiaceae;g__Polaromonas;s__	3.41502e+06	d__Bacteria;p__Proteobacteria;c__Gammaproteobacteria;o__Burkholderiales;f__Burkholderiaceae;g__Polaromonas;s__	GCF_002379085.1	80.054	0.44	Absence
SLM_LV1_30a-F07	>3.0 um	SAMN40274807	JBCKOI000000000	11878418	11340444	11337332	11337240	245604	670039	60.743	117	22627	7187	0.572797	20.6897	0	821	0.891566	d__Bacteria;p__Proteobacteria;c__Gammaproteobacteria;o__Burkholderiales;f__Burkholderiaceae;g__Polaromonas;s__	3.23852e+06	d__Bacteria;p__Proteobacteria;c__Gammaproteobacteria;o__Burkholderiales;f__Burkholderiaceae;g__Polaromonas;s__	GCF_000013865.1	80.2522	0.34	Absence
SLM_LV1_0830-K21	0.8~3.0 um	SAMN40274808	JBCKOJ000000000	11418288	10747666	10743889	10743858	583280	1524250	64.8859	163	44463	12786	0.576216	28.1516	0.498442	1690	0.889582	d__Bacteria;p__Proteobacteria;c__Gammaproteobacteria;o__Burkholderiales;f__Burkholderiaceae;g__Polaromonas;s__	5.41443e+06	d__Bacteria;p__Proteobacteria;c__Gammaproteobacteria;o__Burkholderiales;f__Burkholderiaceae;g__Polaromonas;s__	GCF_002379095.1	79.9287	0.34	Absence
SLM_LV1_0208-I19	0.2~0.8 um	SAMN40274809	JBCKOK000000000	8793699	8238871	8232306	8232291	755750	2040565	64.0716	210	51060	15253	0.576749	52.7443	1.23498	2292	0.883698	d__Bacteria;p__Proteobacteria;c__Gammaproteobacteria;o__Burkholderiales;f__Burkholderiaceae;g__Polaromonas;s__	3.86879e+06	d__Bacteria;p__Proteobacteria;c__Gammaproteobacteria;o__Burkholderiales;f__Burkholderiaceae;g__Polaromonas;s__	GCA_009844085.1	88.2258	0.01	Presence
SLM_LV1_30a-P02	>3.0 um	SAMN40274810	JBCKOL000000000	9235349	8679693	8676429	8676421	118948	318076	59.7872	70	22151	5066	0.578318	7.83684	0.233645	384	0.878186	d__Bacteria;p__Proteobacteria;c__Gammaproteobacteria;o__Burkholderiales;f__Burkholderiaceae;g__Polaromonas;s__	4.05873e+06	d__Bacteria;p__Proteobacteria;c__Gammaproteobacteria;o__Burkholderiales;f__Burkholderiaceae;g__Polaromonas;s__	GCF_014641715.1	79.3139	0.4	Absence
SLM_LV1_30a-K08	>3.0 um	SAMN40274811	JBCKOM000000000	7467867	7039700	6962151	6962144	355802	863948	69.5304	88	47119	16441	0.577524	29.3103	0	920	0.886882	d__Bacteria;p__Proteobacteria;c__Gammaproteobacteria;o__Burkholderiales;f__Burkholderiaceae;g__Polaromonas;s__	2.94759e+06	d__Bacteria;p__Proteobacteria;c__Gammaproteobacteria;o__Burkholderiales;f__Burkholderiaceae;g__Polaromonas;s__	GCF_001598235.1	80.1887	0.56	Absence
SLM_LV1_0208-I20	0.2~0.8 um	SAMN40274812	JBCKON000000000	7797780	7302258	7294573	7294551	596903	1710719	60.0098	162	67920	16039	0.579146	48.3606	0.683411	1833	0.887289	d__Bacteria;p__Proteobacteria;c__Gammaproteobacteria;o__Burkholderiales;f__Burkholderiaceae;g__Polaromonas;s__	3.53742e+06	d__Bacteria;p__Proteobacteria;c__Gammaproteobacteria;o__Burkholderiales;f__Burkholderiaceae;g__Polaromonas;s__	GCF_015155755.1	85.7794	0	Presence
SLM_LV1_0208-E02	0.2~0.8 um	SAMN40274813	JBCKOO000000000	7059376	6551343	6548338	6548264	435977	1227108	57.008	170	35308	10015	0.573144	21.0031	0	1429	0.869012	d__Bacteria;p__Proteobacteria;c__Gammaproteobacteria;o__Burkholderiales;f__Burkholderiaceae;g__Polaromonas;s__	5.8425e+06	d__Bacteria;p__Proteobacteria;c__Gammaproteobacteria;o__Burkholderiales;f__Burkholderiaceae;g__Polaromonas;s__	GCF_016785095.1	87.2525	0.01	Presence
SLM_MC1B_02-C16	0~2 cm	SAMN40274814	JBCKOP000000000	7888261	7300758	7297895	7297864	204502	690254	52.5616	52	57966	18269	0.577224	29.236	0.233645	699	0.922605	d__Bacteria;p__Proteobacteria;c__Gammaproteobacteria;o__Burkholderiales;f__Burkholderiaceae;g__Polaromonas;s__	2.36097e+06	d__Bacteria;p__Proteobacteria;c__Gammaproteobacteria;o__Burkholderiales;f__Burkholderiaceae;g__Polaromonas;s__	GCF_002379085.1	80.6938	0.57	Presence
SLM_LV1_30a-F08	>3.0 um	SAMN40274815	JBCKOQ000000000	11061499	10512177	10506762	10506739	304751	830792	64.8493	75	55615	17149	0.570681	35.2357	0.514019	871	0.912191	d__Bacteria;p__Proteobacteria;c__Gammaproteobacteria;o__Burkholderiales;f__Burkholderiaceae;g__Polaromonas;s__	2.35781e+06	d__Bacteria;p__Proteobacteria;c__Gammaproteobacteria;o__Burkholderiales;f__Burkholderiaceae;g__Polaromonas;s__	GCF_016584115.1	81.4213	0.01	Presence
SLM_LV1_0208-F09	0.2~0.8 um	SAMN40274816	JBCKOR000000000	9606868	9002695	8977937	8977881	325114	885742	64.7205	72	60875	20353	0.596627	44.8276	0	925	0.904364	d__Bacteria;p__Proteobacteria;c__Gammaproteobacteria;o__Burkholderiales;f__Burkholderiaceae;g__Rhodoferax;s__	1.97589e+06	d__Bacteria;p__Proteobacteria;c__Gammaproteobacteria;o__Burkholderiales;f__Burkholderiaceae;g__Rhodoferax;s__	GCA_012927445.1	81.0725	0.63	Presence
SLM_MC1B_68-C02	6~8 cm	SAMN40274817	JBCKOS000000000	9112746	8570403	8565604	8565599	724157	2115006	58.1917	179	82801	20373	0.623538	39.7107	0	2234	0.898729	d__Bacteria;p__Proteobacteria;c__Gammaproteobacteria;o__Burkholderiales;f__Burkholderiaceae;g__CAIKVZ01;s__	5.32603e+06	d__Bacteria;p__Proteobacteria;c__Gammaproteobacteria;o__Burkholderiales;f__Burkholderiaceae;g__;s__	GCF_000152825.2	82.895	0	Absence
SLM_MC1B_68-L15	6~8 cm	SAMN40274818	JBCKOT000000000	7119781	6773404	6770653	6770652	253905	784801	52.7272	95	42129	12560	0.614907	20.8093	0	861	0.891908	d__Bacteria;p__Proteobacteria;c__Gammaproteobacteria;o__Burkholderiales;f__Burkholderiaceae;g__CAIKVZ01;s__	3.7714e+06	d__Bacteria;p__Proteobacteria;c__Gammaproteobacteria;o__Burkholderiales;f__Burkholderiaceae;g__;s__	GCA_013360595.1	80.349	0	Absence
SLM_MC1B_68-O15	6~8 cm	SAMN40274819	JBCKOU000000000	9936913	9524745	9507211	9507204	272801	892489	50.8255	87	46346	16165	0.614493	4.16667	0	937	0.898772	d__Bacteria;p__Proteobacteria;c__Gammaproteobacteria;o__Burkholderiales;f__Burkholderiaceae;g__Symbiobacter;s__	2.14197e+07	d__Bacteria;p__Proteobacteria;c__Gammaproteobacteria;o__Burkholderiales;f__Burkholderiaceae;g__;s__	GCF_016807485.1	86.9066	0	Absence
SLM_MC1B_68-A07	6~8 cm	SAMN40274820	JBCKOV000000000	8293184	7818088	7810155	7810152	595584	1542460	65.3632	158	41733	14749	0.626164	31.1059	0	1575	0.899096	d__Bacteria;p__Proteobacteria;c__Gammaproteobacteria;o__Burkholderiales;f__Burkholderiaceae;g__Polaromonas;s__	4.95873e+06	d__Bacteria;p__Proteobacteria;c__Gammaproteobacteria;o__Burkholderiales;f__Burkholderiaceae;g__;s__	GCF_014898075.1	86.8349	0	Presence
SLM_MC1B_68-M17	6~8 cm	SAMN40274821	JBCKOW000000000	11195761	10648871	10642861	10642856	373716	1330285	48.0363	125	49078	20790	0.621387	29.023	0	1390	0.895144	d__Bacteria;p__Proteobacteria;c__Gammaproteobacteria;o__Burkholderiales;f__Burkholderiaceae;g__;s__	4.58356e+06	d__Bacteria;p__Proteobacteria;c__Gammaproteobacteria;o__Burkholderiales;f__Burkholderiaceae;g__;s__	GCF_900635475.1	87.7217	0.02	Presence
SLM_MC1B_46-D09	4~6 cm	SAMN40274822	JBCKOX000000000	8037540	7567143	7562569	7562562	293546	781099	63.8014	105	40965	10418	0.621248	17.2414	0	849	0.891817	d__Bacteria;p__Proteobacteria;c__Gammaproteobacteria;o__Burkholderiales;f__Burkholderiaceae;g__Polaromonas;s__	4.53037e+06	d__Bacteria;p__Proteobacteria;c__Gammaproteobacteria;o__Burkholderiales;f__Burkholderiaceae;g__;s__	GCA_019232735.1	79.9575	0	Absence
SLM_MC1B_02-C09	0~2 cm	SAMN40274823	JBCKOY000000000	7803315	7282774	7278233	7278218	640347	1825446	60.1836	166	51323	19817	0.625707	47.1954	0	1879	0.901836	d__Bacteria;p__Proteobacteria;c__Gammaproteobacteria;o__Burkholderiales;f__Burkholderiaceae;g__PHCI01;s__	3.86785e+06	d__Bacteria;p__Proteobacteria;c__Gammaproteobacteria;o__Burkholderiales;f__Burkholderiaceae;g__;s__	GCA_003646045.1	78.6136	0.01	Absence
SLM_MC1B_24-N15	2~4 cm	SAMN40274824	JBCKOZ000000000	10679010	10111701	10075213	10075069	337674	1182536	48.5337	122	39961	14655	0.62363	30.4505	0	1250	0.901823	d__Bacteria;p__Proteobacteria;c__Gammaproteobacteria;o__Burkholderiales;f__Burkholderiaceae;g__Rhodoferax_A;s__	3.88346e+06	d__Bacteria;p__Proteobacteria;c__Gammaproteobacteria;o__Burkholderiales;f__Burkholderiaceae;g__;s__	GCA_009699615.1	79.402	0.02	Absence
SLM_MC1B_24-L18	2~4 cm	SAMN40274825	JBCKPA000000000	10249175	9716689	9711311	9711111	430825	1427176	51.7288	142	58778	15634	0.622417	29.3515	0	1514	0.896248	d__Bacteria;p__Proteobacteria;c__Gammaproteobacteria;o__Burkholderiales;f__Burkholderiaceae;g__PHCI01;s__	4.86235e+06	d__Bacteria;p__Proteobacteria;c__Gammaproteobacteria;o__Burkholderiales;f__Burkholderiaceae;g__;s__	GCF_003025035.1	85.829	0.01	Presence
SLM_MC1B_68-C06	6~8 cm	SAMN40274826	JBCKPB000000000	10361410	9789764	9776506	9776485	489159	1440146	57.5663	132	54658	18420	0.627681	41.4843	0	1493	0.907445	d__Bacteria;p__Proteobacteria;c__Gammaproteobacteria;o__Burkholderiales;f__Burkholderiaceae;g__PHCI01;s__	3.47154e+06	d__Bacteria;p__Proteobacteria;c__Gammaproteobacteria;o__Burkholderiales;f__Burkholderiaceae;g__;s__	GCA_010027845.1	82.9458	0	Absence
SLM_MC1B_24-E16	2~4 cm	SAMN40274827	JBCKPC000000000	9926984	9534309	9519450	9519418	526768	1431550	63.7579	128	66361	19738	0.624827	38.8117	0	1492	0.904121	d__Bacteria;p__Proteobacteria;c__Gammaproteobacteria;o__Burkholderiales;f__Burkholderiaceae;g__Tibeticola;s__	3.68844e+06	d__Bacteria;p__Proteobacteria;c__Gammaproteobacteria;o__Burkholderiales;f__Burkholderiaceae;g__;s__	GCA_002686135.1	78.7948	0	Absence
SLM_MC1B_68-D06	6~8 cm	SAMN40274828	JBCKPD000000000	8178347	7721594	7713621	7713616	713962	1868055	65.6746	153	102227	22421	0.627748	44.5197	0	1912	0.90845	d__Bacteria;p__Proteobacteria;c__Gammaproteobacteria;o__Burkholderiales;f__Burkholderiaceae;g__Rhodoferax_A;s__	4.19602e+06	d__Bacteria;p__Proteobacteria;c__Gammaproteobacteria;o__Burkholderiales;f__Burkholderiaceae;g__;s__	GCF_016811995.1	79.5066	0	Absence
SLM_MC1B_68-M02	6~8 cm	SAMN40274829	JBCKPE000000000	6741867	6440297	6434295	6434286	839819	2309529	62.344	209	99824	19395	0.62581	55.4851	0	2425	0.8984	d__Bacteria;p__Proteobacteria;c__Gammaproteobacteria;o__Burkholderiales;f__Burkholderiaceae;g__CAIKVZ01;s__	4.16243e+06	d__Bacteria;p__Proteobacteria;c__Gammaproteobacteria;o__Burkholderiales;f__Burkholderiaceae;g__;s__	GCF_014192475.1	82.2958	0	Presence
SLM_MC1B_68-K11	6~8 cm	SAMN40274830	JBCKPF000000000	8781029	8325054	8321004	8320979	592199	1629829	61.7891	162	89630	15992	0.624162	33.6247	0.0311526	1739	0.8986	d__Bacteria;p__Proteobacteria;c__Gammaproteobacteria;o__Burkholderiales;f__Burkholderiaceae;g__Polaromonas;s__	4.84712e+06	d__Bacteria;p__Proteobacteria;c__Gammaproteobacteria;o__Burkholderiales;f__Burkholderiaceae;g__;s__	GCF_016801775.1	83.4811	0	Presence
SLM_MC1B_68-O13	6~8 cm	SAMN40274831	JBCKPG000000000	8939542	8409063	8400648	8400407	483220	1427200	58.0626	114	75365	17572	0.6255	35.4891	0	1528	0.901248	d__Bacteria;p__Proteobacteria;c__Gammaproteobacteria;o__Burkholderiales;f__Burkholderiaceae;g__Rhodoferax_A;s__	4.02152e+06	d__Bacteria;p__Proteobacteria;c__Gammaproteobacteria;o__Burkholderiales;f__Burkholderiaceae;g__;s__	GCF_002163625.1	87.6761	0.01	Presence
SLM_MC1B_24-P11	2~4 cm	SAMN40274832	JBCKPH000000000	8932433	8513457	8508009	8508002	1002570	2694265	65.228	216	66418	20816	0.627441	62.8744	0.46729	2808	0.906202	d__Bacteria;p__Proteobacteria;c__Gammaproteobacteria;o__Burkholderiales;f__Burkholderiaceae;g__CAIKVZ01;s__	4.28516e+06	d__Bacteria;p__Proteobacteria;c__Gammaproteobacteria;o__Burkholderiales;f__Burkholderiaceae;g__;s__	GCA_005503335.1	78.5304	0.3	Presence
SLM_MC1B_68-F10	6~8 cm	SAMN40274833	JBCKPI000000000	7845033	7463441	7460162	7460157	285376	979700	49.6621	105	34696	13684	0.619743	28.6983	0	1060	0.90119	d__Bacteria;p__Proteobacteria;c__Gammaproteobacteria;o__Burkholderiales;f__Burkholderiaceae;g__Rhodoferax_A;s__	3.4138e+06	d__Bacteria;p__Proteobacteria;c__Gammaproteobacteria;o__Burkholderiales;f__Burkholderiaceae;g__;s__	GCA_902800055.1	80.0853	0	Absence
SLM_MC1B_68-K14	6~8 cm	SAMN40274834	JBCKPJ000000000	8386988	7976049	7971972	7971971	288251	853461	57.3777	93	61945	14933	0.617535	22.4138	0	934	0.887797	d__Bacteria;p__Proteobacteria;c__Gammaproteobacteria;o__Burkholderiales;f__Burkholderiaceae;g__Tibeticola;s__	3.80775e+06	d__Bacteria;p__Proteobacteria;c__Gammaproteobacteria;o__Burkholderiales;f__Burkholderiaceae;g__;s__	GCF_009467795.1	84.0227	0	Presence
SLM_MC1B_02-G13	0~2 cm	SAMN40274835	JBCKPK000000000	8871749	8331113	8326466	8326460	482349	1500013	52.1091	184	48393	13075	0.619717	33.2915	0	1658	0.888642	d__Bacteria;p__Proteobacteria;c__Gammaproteobacteria;o__Burkholderiales;f__Burkholderiaceae;g__;s__	4.50569e+06	d__Bacteria;p__Proteobacteria;c__Gammaproteobacteria;o__Burkholderiales;f__Burkholderiaceae;g__;s__	GCF_001758195.1	86.6985	0	Presence
SLM_MC1B_68-J07	6~8 cm	SAMN40274836	JBCKPL000000000	7231901	6881661	6879229	6879216	418950	1105509	63.615	142	48524	10077	0.576544	35.8766	0	1138	0.881527	d__Bacteria;p__Proteobacteria;c__Gammaproteobacteria;o__Burkholderiales;f__Usitatibacteraceae;g__UKL13-2;s__	3.08142e+06	d__Bacteria;p__Proteobacteria;c__Gammaproteobacteria;o__Burkholderiales;f__Usitatibacteraceae;g__UKL13-2;s__	GCA_009692205.1	84.8349	0	Absence
SLM_MC1B_68-O16	6~8 cm	SAMN40274837	JBCKPM000000000	7422476	6961629	6959559	6959524	761410	1990577	66.8207	189	45979	17006	0.575819	58.8689	0	2023	0.883576	d__Bacteria;p__Proteobacteria;c__Gammaproteobacteria;o__Burkholderiales;f__Usitatibacteraceae;g__UKL13-2;s__	3.38138e+06	d__Bacteria;p__Proteobacteria;c__Gammaproteobacteria;o__Burkholderiales;f__Usitatibacteraceae;g__UKL13-2;s__	GCA_015665295.1	84.6288	0	Presence
SLM_MC1B_24-P16	2~4 cm	SAMN40274838	JBCKPN000000000	9402977	8812415	8808503	8808440	780522	2100421	67.1244	176	65324	19100	0.577795	65.5047	0.236967	2056	0.882504	d__Bacteria;p__Proteobacteria;c__Gammaproteobacteria;o__Burkholderiales;f__Usitatibacteraceae;g__UKL13-2;s__	3.20652e+06	d__Bacteria;p__Proteobacteria;c__Gammaproteobacteria;o__Burkholderiales;f__Usitatibacteraceae;g__UKL13-2;s__	GCF_001713415.1	81.5152	0.01	Presence
SLM_LV1_0208-I15	0.2~0.8 um	SAMN40274839	JBCKPO000000000	10184523	9471029	9468746	9468558	295736	750915	67.5362	71	42272	15507	0.549672	33.4189	0	831	0.858662	d__Bacteria;p__Proteobacteria;c__Gammaproteobacteria;o__Burkholderiales;f__Gallionellaceae;g__Nitrotoga;s__	2.24698e+06	d__Bacteria;p__Proteobacteria;c__Gammaproteobacteria;o__Burkholderiales;f__Gallionellaceae;g__Nitrotoga;s__	GCF_010092425.1	81.0499	0.04	Presence
SLM_LV1_0830-A01	0.8~3.0 um	SAMN40274840	JBCKPP000000000	9942607	9318135	9314218	9314139	119631	277543	68.3507	47	23507	6885	0.554058	16.0683	0	298	0.889913	d__Bacteria;p__Proteobacteria;c__Gammaproteobacteria;o__Burkholderiales;f__Gallionellaceae;g__Nitrotoga;s__	1.72727e+06	d__Bacteria;p__Proteobacteria;c__Gammaproteobacteria;o__Burkholderiales;f__Gallionellaceae;g__Nitrotoga;s__	GCA_009885195.1	80.6785	0.54	Absence
SLM_LV1_0208-L21	0.2~0.8 um	SAMN40274841	JBCKPQ000000000	9064151	8519955	8510512	8510477	262056	683054	66.635	99	28436	8865	0.552147	31.0345	0	717	0.873739	d__Bacteria;p__Proteobacteria;c__Gammaproteobacteria;o__Burkholderiales;f__Gallionellaceae;g__Nitrotoga;s__	2.20095e+06	d__Bacteria;p__Proteobacteria;c__Gammaproteobacteria;o__Burkholderiales;f__Gallionellaceae;g__Nitrotoga;s__	GCA_009885195.1	80.0804	0.5	Absence
SLM_LV1_0830-M21	0.8~3.0 um	SAMN40274842	JBCKPR000000000	9861245	9377091	9374412	9374402	401507	1085940	64.7221	107	32817	15905	0.555006	56.3218	3.44828	1121	0.873979	d__Bacteria;p__Proteobacteria;c__Gammaproteobacteria;o__Burkholderiales;f__Gallionellaceae;g__Nitrotoga;s__	1.9281e+06	d__Bacteria;p__Proteobacteria;c__Gammaproteobacteria;o__Burkholderiales;f__Gallionellaceae;g__Nitrotoga;s__	GCA_018240425.1	84.2392	0	Presence
SLM_LV1_0830-A17	0.8~3.0 um	SAMN40274843	JBCKPS000000000	8944360	8331922	8324880	8324644	203354	504025	63.6448	64	53144	9562	0.553897	20.0575	0	540	0.872183	d__Bacteria;p__Proteobacteria;c__Gammaproteobacteria;o__Burkholderiales;f__Gallionellaceae;g__Nitrotoga;s__	2.51289e+06	d__Bacteria;p__Proteobacteria;c__Gammaproteobacteria;o__Burkholderiales;f__Gallionellaceae;g__Nitrotoga;s__	GCA_016703225.1	81.0588	0.04	Presence
SLM_LV1_0830-J19	0.8~3.0 um	SAMN40274844	JBCKPT000000000	7553945	7127111	7124178	7124175	232918	641994	61.2544	76	32398	13587	0.55698	30.7635	0	651	0.870634	d__Bacteria;p__Proteobacteria;c__Gammaproteobacteria;o__Burkholderiales;f__Gallionellaceae;g__Nitrotoga;s__	2.08687e+06	d__Bacteria;p__Proteobacteria;c__Gammaproteobacteria;o__Burkholderiales;f__Gallionellaceae;g__Nitrotoga;s__	GCA_009885195.1	80.2574	0.42	Absence
SLM_LV1_30a-C22	>3.0 um	SAMN40274845	JBCKPU000000000	10482120	9789003	9785219	9785219	210066	501371	69.9172	59	35056	13516	0.556478	31.6534	0	535	0.865776	d__Bacteria;p__Proteobacteria;c__Gammaproteobacteria;o__Burkholderiales;f__Gallionellaceae;g__Nitrotoga;s__	1.58394e+06	d__Bacteria;p__Proteobacteria;c__Gammaproteobacteria;o__Burkholderiales;f__Gallionellaceae;g__Nitrotoga;s__	GCF_010211755.1	79.6532	0.06	Presence
SLM_LV1_30a-I06	>3.0 um	SAMN40274846	JBCKPV000000000	10069570	9545585	9544318	9544298	113337	250599	65.9862	49	12609	5695	0.54345	18.9655	0	276	0.872697	d__Bacteria;p__Proteobacteria;c__Gammaproteobacteria;o__Burkholderiales;f__Gallionellaceae;g__Nitrotoga;s__	1.32134e+06	d__Bacteria;p__Proteobacteria;c__Gammaproteobacteria;o__Burkholderiales;f__Gallionellaceae;g__Nitrotoga;s__	GCA_016218445.1	79.6988	0.49	Absence
SLM_LV1_0830-L16	0.8~3.0 um	SAMN40274847	JBCKPW000000000	9597028	8999069	8984615	8984609	221581	520191	71.1509	55	45783	12932	0.547778	23.9601	0.947867	542	0.862156	d__Bacteria;p__Proteobacteria;c__Gammaproteobacteria;o__Burkholderiales;f__Gallionellaceae;g__Nitrotoga;s__	2.17107e+06	d__Bacteria;p__Proteobacteria;c__Gammaproteobacteria;o__Burkholderiales;f__Gallionellaceae;g__Nitrotoga;s__	GCA_009885195.1	80.272	0.52	Absence
SLM_LV1_30a-G23	>3.0 um	SAMN40274848	JBCKPX000000000	10353275	9771233	9764216	9764209	223637	664736	65.4965	61	109020	16814	0.54932	32.2084	3.31754	716	0.862312	d__Bacteria;p__Proteobacteria;c__Gammaproteobacteria;o__Burkholderiales;f__Gallionellaceae;g__Nitrotoga;s__	2.06386e+06	d__Bacteria;p__Proteobacteria;c__Gammaproteobacteria;o__Burkholderiales;f__Gallionellaceae;g__Nitrotoga;s__	GCA_009885195.1	79.4677	0.35	Absence
SLM_LV1_0830-A09	0.8~3.0 um	SAMN40274849	JBCKPY000000000	11054180	10111579	10106221	10105646	78785	172113	69.6872	23	21666	9363	0.545206	15.5172	0	175	0.839268	d__Bacteria;p__Proteobacteria;c__Gammaproteobacteria;o__Burkholderiales;f__Gallionellaceae;g__Nitrotoga;s__	1.10917e+06	d__Bacteria;p__Proteobacteria;c__Gammaproteobacteria;o__Burkholderiales;f__Gallionellaceae;g__Nitrotoga;s__	GCA_009885195.1	79.4836	0.42	Presence
SLM_LV1_30a-F03	>3.0 um	SAMN40274850	JBCKPZ000000000	8808000	8282629	8280191	8280120	169541	388145	69.4834	55	39060	9896	0.54668	10.2926	0	422	0.845612	d__Bacteria;p__Proteobacteria;c__Gammaproteobacteria;o__Burkholderiales;f__Gallionellaceae;g__Nitrotoga;s__	3.77111e+06	d__Bacteria;p__Proteobacteria;c__Gammaproteobacteria;o__Burkholderiales;f__Gallionellaceae;g__Nitrotoga;s__	GCA_009885195.1	80.3467	0.49	Absence
SLM_LV1_0208-L20	0.2~0.8 um	SAMN40274851	JBCKQA000000000	8814113	8345104	8338636	8338611	536453	1377150	69.2635	117	51902	19963	0.549062	62.2756	2.60664	1431	0.874926	d__Bacteria;p__Proteobacteria;c__Gammaproteobacteria;o__Burkholderiales;f__Gallionellaceae;g__Nitrotoga;s__	2.21138e+06	d__Bacteria;p__Proteobacteria;c__Gammaproteobacteria;o__Burkholderiales;f__Gallionellaceae;g__Nitrotoga;s__	GCF_000420265.1	84.9874	0	Presence
SLM_LV1_0830-J14	0.8~3.0 um	SAMN40274852	JBCKQB000000000	10833709	10161553	10158577	10158557	210453	488388	66.7668	66	27220	10286	0.555917	29.0343	0	546	0.873359	d__Bacteria;p__Proteobacteria;c__Gammaproteobacteria;o__Burkholderiales;f__Gallionellaceae;g__Nitrotoga;s__	1.68211e+06	d__Bacteria;p__Proteobacteria;c__Gammaproteobacteria;o__Burkholderiales;f__Gallionellaceae;g__Nitrotoga;s__	GCA_009885195.1	79.8094	0.59	Absence
SLM_LV1_0830-E22	0.8~3.0 um	SAMN40274853	JBCKQC000000000	7163122	6716764	6711581	6709526	147638	379434	65.4354	56	22297	8127	0.541562	14.3417	0	430	0.869015	d__Bacteria;p__Proteobacteria;c__Gammaproteobacteria;o__Burkholderiales;f__Gallionellaceae;g__;s__	2.64567e+06	d__Bacteria;p__Proteobacteria;c__Gammaproteobacteria;o__Burkholderiales;f__Gallionellaceae;g__Nitrotoga;s__	GCA_009885195.1	80.119	0.46	Absence
SLM_LV1_30a-B05	>3.0 um	SAMN40274854	JBCKQD000000000	8134168	7619058	7616320	7616282	223669	630523	66.9099	58	51409	18488	0.552184	30.1513	3.88626	685	0.868373	d__Bacteria;p__Proteobacteria;c__Gammaproteobacteria;o__Burkholderiales;f__Gallionellaceae;g__Nitrotoga;s__	2.0912e+06	d__Bacteria;p__Proteobacteria;c__Gammaproteobacteria;o__Burkholderiales;f__Gallionellaceae;g__Nitrotoga;s__	GCA_009885195.1	80.1336	0.47	Absence
SLM_LV1_0830-B03	0.8~3.0 um	SAMN40274855	JBCKQE000000000	10485790	9889928	9884362	9884304	165718	433934	63.9463	50	25121	12526	0.558405	30.4499	0	475	0.883519	d__Bacteria;p__Proteobacteria;c__Gammaproteobacteria;o__Burkholderiales;f__Gallionellaceae;g__Nitrotoga;s__	1.42508e+06	d__Bacteria;p__Proteobacteria;c__Gammaproteobacteria;o__Burkholderiales;f__Gallionellaceae;g__Nitrotoga;s__	GCA_016218445.1	80.1725	0.48	Absence
SLM_LV1_30a-E19	>3.0 um	SAMN40274856	JBCKQF000000000	6998287	6536844	6535129	6535094	214362	562463	66.8191	54	41315	14246	0.54988	8.33333	0	605	0.868036	d__Bacteria;p__Proteobacteria;c__Gammaproteobacteria;o__Burkholderiales;f__Gallionellaceae;g__Nitrotoga;s__	6.74956e+06	d__Bacteria;p__Proteobacteria;c__Gammaproteobacteria;o__Burkholderiales;f__Gallionellaceae;g__Nitrotoga;s__	GCA_009885195.1	79.9658	0.47	Absence
SLM_LV1_0830-N14	0.8~3.0 um	SAMN40274857	JBCKQG000000000	9599198	9077415	9075014	9075012	191090	500791	60.8054	82	24425	7800	0.553906	29.2892	0.473934	552	0.867849	d__Bacteria;p__Proteobacteria;c__Gammaproteobacteria;o__Burkholderiales;f__Gallionellaceae;g__Nitrotoga;s__	1.70981e+06	d__Bacteria;p__Proteobacteria;c__Gammaproteobacteria;o__Burkholderiales;f__Gallionellaceae;g__Nitrotoga;s__	GCA_009885195.1	80.2201	0.43	Absence
SLM_LV1_30a-J21	>3.0 um	SAMN40274858	JBCKQH000000000	8980773	8499069	8496335	8496310	371414	978225	66.0973	89	54122	18060	0.54903	50.0407	2.1327	1007	0.870523	d__Bacteria;p__Proteobacteria;c__Gammaproteobacteria;o__Burkholderiales;f__Gallionellaceae;g__Nitrotoga;s__	1.95486e+06	d__Bacteria;p__Proteobacteria;c__Gammaproteobacteria;o__Burkholderiales;f__Gallionellaceae;g__Nitrotoga;s__	GCA_009885195.1	79.8684	0.4	Absence
SLM_LV1_30a-E04	>3.0 um	SAMN40274859	JBCKQI000000000	8413128	7911568	7904883	7904881	205301	598951	58.3084	71	34136	10263	0.556025	25.2351	0	624	0.867894	d__Bacteria;p__Proteobacteria;c__Gammaproteobacteria;o__Burkholderiales;f__Gallionellaceae;g__;s__	2.37348e+06	d__Bacteria;p__Proteobacteria;c__Gammaproteobacteria;o__Burkholderiales;f__Gallionellaceae;g__Nitrotoga;s__	GCA_009885195.1	79.6027	0.45	Presence
SLM_LV1_0830-D03	0.8~3.0 um	SAMN40274860	JBCKQJ000000000	7470396	7051975	7050737	7050334	176405	472798	65.0554	71	20820	9363	0.554383	18.9655	0	511	0.857353	d__Bacteria;p__Proteobacteria;c__Gammaproteobacteria;o__Burkholderiales;f__Gallionellaceae;g__Nitrotoga;s__	2.49293e+06	d__Bacteria;p__Proteobacteria;c__Gammaproteobacteria;o__Burkholderiales;f__Gallionellaceae;g__Nitrotoga;s__	GCA_903892645.1	80.2059	0.39	Presence
SLM_LV1_30a-K02	>3.0 um	SAMN40274861	JBCKQK000000000	8465427	7908029	7899046	7898450	350862	950986	64.263	78	61929	21226	0.562724	51.8084	0.119048	966	0.87591	d__Bacteria;p__Proteobacteria;c__Gammaproteobacteria;o__Burkholderiales;f__Gallionellaceae;g__Nitrotoga;s__	1.83558e+06	d__Bacteria;p__Proteobacteria;c__Gammaproteobacteria;o__Burkholderiales;f__Gallionellaceae;g__Nitrotoga;s__	GCF_003610015.1	81.2694	0.02	Presence
SLM_LV1_30a-P17	>3.0 um	SAMN40274862	JBCKQL000000000	8857936	8399948	8396512	8396492	314111	836947	64.5995	86	67066	14064	0.55227	36.5399	0.0278784	909	0.857336	d__Bacteria;p__Proteobacteria;c__Gammaproteobacteria;o__Burkholderiales;f__Gallionellaceae;g__Nitrotoga;s__	2.2905e+06	d__Bacteria;p__Proteobacteria;c__Gammaproteobacteria;o__Burkholderiales;f__Gallionellaceae;g__Nitrotoga;s__	GCA_009885195.1	79.8449	0.4	Presence
SLM_LV1_0830-L19	0.8~3.0 um	SAMN40274863	JBCKQM000000000	10578433	9897377	9894559	9894554	130648	304131	62.6431	65	14295	5392	0.545551	17.2414	0	370	0.856023	d__Bacteria;p__Proteobacteria;c__Gammaproteobacteria;o__Burkholderiales;f__Gallionellaceae;g__Nitrotoga;s__	1.76396e+06	d__Bacteria;p__Proteobacteria;c__Gammaproteobacteria;o__Burkholderiales;f__Gallionellaceae;g__Nitrotoga;s__	GCA_009885195.1	79.754	0.4	Absence
SLM_LV1_0830-G23	0.8~3.0 um	SAMN40275134	JBCKQN000000000	7891634	7450845	7449083	7449079	156603	410837	61.3865	67	30961	6901	0.551051	14.5199	0.236967	447	0.885422	d__Bacteria;p__Proteobacteria;c__Gammaproteobacteria;o__Burkholderiales;f__Gallionellaceae;g__Nitrotoga;s__	2.82948e+06	d__Bacteria;p__Proteobacteria;c__Gammaproteobacteria;o__Burkholderiales;f__Gallionellaceae;g__Nitrotoga;s__	GCA_009885195.1	80.7064	0.37	Absence
SLM_LV1_0208-O09	0.2~0.8 um	SAMN40275135	JBCKQO000000000	8334774	7827265	7824918	7824821	356765	940212	67.9756	97	46840	13242	0.556639	47.2041	3.63349	983	0.875062	d__Bacteria;p__Proteobacteria;c__Gammaproteobacteria;o__Burkholderiales;f__Gallionellaceae;g__Nitrotoga;s__	1.9918e+06	d__Bacteria;p__Proteobacteria;c__Gammaproteobacteria;o__Burkholderiales;f__Gallionellaceae;g__Nitrotoga;s__	GCA_009885195.1	80.4087	0.44	Absence
SLM_LV1_0830-P09	0.8~3.0 um	SAMN40275136	JBCKQP000000000	7703826	7324897	7322989	7322974	328589	853226	66.0762	86	58049	15709	0.552126	42.9755	0.0278784	901	0.867113	d__Bacteria;p__Proteobacteria;c__Gammaproteobacteria;o__Burkholderiales;f__Gallionellaceae;g__Nitrotoga;s__	1.98538e+06	d__Bacteria;p__Proteobacteria;c__Gammaproteobacteria;o__Burkholderiales;f__Gallionellaceae;g__Nitrotoga;s__	GCA_009885195.1	80.2026	0.38	Presence
SLM_LV1_0830-K10	0.8~3.0 um	SAMN40275137	JBCKQQ000000000	8949831	8341613	8328071	8327986	350209	841685	71.9215	72	41976	18966	0.552447	43.6549	0	884	0.86935	d__Bacteria;p__Proteobacteria;c__Gammaproteobacteria;o__Burkholderiales;f__Gallionellaceae;g__Nitrotoga;s__	1.92804e+06	d__Bacteria;p__Proteobacteria;c__Gammaproteobacteria;o__Burkholderiales;f__Gallionellaceae;g__Nitrotoga;s__	GCA_009885195.1	80.9503	0.39	Presence
SLM_LV1_0830-M17	0.8~3.0 um	SAMN40275138	JBCKQR000000000	9581707	9060971	9056215	9056198	506818	1449630	63.7691	103	80007	21768	0.552849	61.9034	2.7135	1488	0.873861	d__Bacteria;p__Proteobacteria;c__Gammaproteobacteria;o__Burkholderiales;f__Gallionellaceae;g__Nitrotoga;s__	2.34176e+06	d__Bacteria;p__Proteobacteria;c__Gammaproteobacteria;o__Burkholderiales;f__Gallionellaceae;g__Nitrotoga;s__	GCA_009885195.1	80.2439	0.4	Presence
SLM_LV1_0830-B08	0.8~3.0 um	SAMN40275139	JBCKQS000000000	8914674	8348472	8346463	8346354	95512	236618	65.4685	35	36686	9315	0.537212	7.5414	0	259	0.874333	d__Bacteria;p__Proteobacteria;c__Gammaproteobacteria;o__Burkholderiales;f__Gallionellaceae;g__Nitrotoga;s__	3.13759e+06	d__Bacteria;p__Proteobacteria;c__Gammaproteobacteria;o__Burkholderiales;f__Gallionellaceae;g__Nitrotoga;s__	GCA_016218445.1	80.9415	0.37	Absence
SLM_LV1_0830-L23	0.8~3.0 um	SAMN40275140	JBCKQT000000000	8664810	8188964	8185953	8185949	236242	581590	65.8646	79	25996	9284	0.558462	26.3575	0.236967	617	0.862472	d__Bacteria;p__Proteobacteria;c__Gammaproteobacteria;o__Burkholderiales;f__Gallionellaceae;g__Nitrotoga;s__	2.20654e+06	d__Bacteria;p__Proteobacteria;c__Gammaproteobacteria;o__Burkholderiales;f__Gallionellaceae;g__Nitrotoga;s__	GCA_003577315.1	81.985	0.01	Presence
SLM_LV1_0830-A08	0.8~3.0 um	SAMN40275141	JBCKQU000000000	9751578	9166741	9164366	9164312	303765	748673	67.0346	88	31891	11995	0.551673	46.2927	1.09456	830	0.867411	d__Bacteria;p__Proteobacteria;c__Gammaproteobacteria;o__Burkholderiales;f__Gallionellaceae;g__Nitrotoga;s__	1.61726e+06	d__Bacteria;p__Proteobacteria;c__Gammaproteobacteria;o__Burkholderiales;f__Gallionellaceae;g__Nitrotoga;s__	GCA_009885195.1	80.0643	0.42	Absence
SLM_LV1_0208-J21	0.2~0.8 um	SAMN40275142	JBCKQV000000000	9559361	9047768	9045366	9045269	199058	533644	66.0994	68	31181	9855	0.556388	22.4138	0	554	0.882958	d__Bacteria;p__Proteobacteria;c__Gammaproteobacteria;o__Burkholderiales;f__Gallionellaceae;g__Nitrotoga;s__	2.38087e+06	d__Bacteria;p__Proteobacteria;c__Gammaproteobacteria;o__Burkholderiales;f__Gallionellaceae;g__Nitrotoga;s__	GCA_903892645.1	79.4103	0.44	Absence
SLM_LV1_30a-J11	>3.0 um	SAMN40275143	JBCKQW000000000	8230901	7761160	7754662	7754636	273227	797451	59.3056	78	43290	16987	0.555722	34.4828	0	826	0.870381	d__Bacteria;p__Proteobacteria;c__Gammaproteobacteria;o__Burkholderiales;f__Gallionellaceae;g__Nitrotoga;s__	2.31261e+06	d__Bacteria;p__Proteobacteria;c__Gammaproteobacteria;o__Burkholderiales;f__Gallionellaceae;g__Nitrotoga;s__	GCA_009885195.1	80.169	0.42	Presence
SLM_LV1_0208-D22	0.2~0.8 um	SAMN40275144	JBCKQX000000000	9253390	8533712	8531921	8531869	89539	217262	65.4958	38	18464	7684	0.557322	10.9359	0.541638	236	0.863501	d__Bacteria;p__Proteobacteria;c__Gammaproteobacteria;o__Burkholderiales;f__Gallionellaceae;g__;s__	1.98669e+06	d__Bacteria;p__Proteobacteria;c__Gammaproteobacteria;o__Burkholderiales;f__Gallionellaceae;g__Nitrotoga;s__	GCA_009885195.1	80.2142	0.55	Presence
SLM_LV1_0208-K11	0.2~0.8 um	SAMN40275145	JBCKQY000000000	8580339	8104775	8095975	8095691	123442	307387	65.1138	39	29124	12036	0.549552	12.2257	0	337	0.843259	d__Bacteria;p__Proteobacteria;c__Gammaproteobacteria;o__Burkholderiales;f__Gallionellaceae;g__Nitrotoga;s__	2.51427e+06	d__Bacteria;p__Proteobacteria;c__Gammaproteobacteria;o__Burkholderiales;f__Gallionellaceae;g__Nitrotoga;s__	GCF_011303755.1	80.5792	0.11	Presence
SLM_LV1_0208-G16	0.2~0.8 um	SAMN40275146	JBCKQZ000000000	10459308	9936841	9932539	9932394	249448	726291	58.7406	88	54885	13154	0.557325	29.3103	0	741	0.875897	d__Bacteria;p__Proteobacteria;c__Gammaproteobacteria;o__Burkholderiales;f__Gallionellaceae;g__Nitrotoga;s__	2.47793e+06	d__Bacteria;p__Proteobacteria;c__Gammaproteobacteria;o__Burkholderiales;f__Gallionellaceae;g__Nitrotoga;s__	GCA_009885195.1	80.1436	0.42	Absence
SLM_LV1_0208-A16	0.2~0.8 um	SAMN40275147	JBCKRA000000000	9344882	8674511	8669781	8669734	210353	613372	56.7512	68	34943	14093	0.546929	26.2888	0.0805377	679	0.867594	d__Bacteria;p__Proteobacteria;c__Gammaproteobacteria;o__Burkholderiales;f__Gallionellaceae;g__Nitrotoga;s__	2.33321e+06	d__Bacteria;p__Proteobacteria;c__Gammaproteobacteria;o__Burkholderiales;f__Gallionellaceae;g__Nitrotoga;s__	GCA_009885195.1	80.2891	0.41	Absence
SLM_LV1_0830-F16	0.8~3.0 um	SAMN40275148	JBCKRB000000000	11642486	10958791	10954124	10954097	220063	551691	65.8639	75	40170	9087	0.552088	32.2374	0.236967	624	0.863134	d__Bacteria;p__Proteobacteria;c__Gammaproteobacteria;o__Burkholderiales;f__Gallionellaceae;g__Nitrotoga;s__	1.71134e+06	d__Bacteria;p__Proteobacteria;c__Gammaproteobacteria;o__Burkholderiales;f__Gallionellaceae;g__Nitrotoga;s__	GCF_016428975.1	81.487	0.03	Presence
SLM_LV1_0208-J18	0.2~0.8 um	SAMN40275149	JBCKRC000000000	9812258	9257857	9252187	9252001	278613	735583	67.433	80	54762	13560	0.55563	8.62069	0	783	0.864249	d__Bacteria;p__Proteobacteria;c__Gammaproteobacteria;o__Burkholderiales;f__Gallionellaceae;g__Nitrotoga;s__	8.53276e+06	d__Bacteria;p__Proteobacteria;c__Gammaproteobacteria;o__Burkholderiales;f__Gallionellaceae;g__Nitrotoga;s__	GCA_009885195.1	79.6957	0.35	Presence
SLM_LV1_0208-L10	0.2~0.8 um	SAMN40275150	JBCKRD000000000	8856958	8357197	8351101	8350920	319488	921840	59.8434	99	48101	14283	0.554547	44.2947	3.44828	957	0.861187	d__Bacteria;p__Proteobacteria;c__Gammaproteobacteria;o__Burkholderiales;f__Gallionellaceae;g__Nitrotoga;s__	2.08115e+06	d__Bacteria;p__Proteobacteria;c__Gammaproteobacteria;o__Burkholderiales;f__Gallionellaceae;g__Nitrotoga;s__	GCF_009363635.1	85.6814	0	Presence
SLM_LV1_0208-L05	0.2~0.8 um	SAMN40275151	JBCKRE000000000	7764761	7306163	7304013	7304003	392052	983717	68.2634	113	41989	11844	0.557789	37.931	0	1053	0.87475	d__Bacteria;p__Proteobacteria;c__Gammaproteobacteria;o__Burkholderiales;f__Gallionellaceae;g__Nitrotoga;s__	2.59344e+06	d__Bacteria;p__Proteobacteria;c__Gammaproteobacteria;o__Burkholderiales;f__Gallionellaceae;g__Nitrotoga;s__	GCA_016218445.1	80.0611	0.44	Absence
SLM_LV1_0208-C13	0.2~0.8 um	SAMN40275152	JBCKRF000000000	9680604	8973541	8967972	8967965	269847	679218	65.2131	82	33581	12797	0.557819	34.012	0.473934	713	0.873887	d__Bacteria;p__Proteobacteria;c__Gammaproteobacteria;o__Burkholderiales;f__Gallionellaceae;g__Nitrotoga;s__	1.997e+06	d__Bacteria;p__Proteobacteria;c__Gammaproteobacteria;o__Burkholderiales;f__Gallionellaceae;g__Nitrotoga;s__	GCA_009885195.1	80.2315	0.48	Absence
SLM_LV1_30a-O03	>3.0 um	SAMN40275153	JBCKRG000000000	8467424	7993103	7989576	7989574	269249	706187	63.2374	89	33145	9937	0.553135	22.6489	0	751	0.869864	d__Bacteria;p__Proteobacteria;c__Gammaproteobacteria;o__Burkholderiales;f__Gallionellaceae;g__Nitrotoga;s__	3.11797e+06	d__Bacteria;p__Proteobacteria;c__Gammaproteobacteria;o__Burkholderiales;f__Gallionellaceae;g__Nitrotoga;s__	GCA_009885195.1	80.5939	0.42	Absence
SLM_LV1_30a-D16	>3.0 um	SAMN40275154	JBCKRH000000000	10073816	9384618	9382314	9382299	254560	703830	59.1468	102	36479	8822	0.555677	41.6928	3.44828	749	0.871381	d__Bacteria;p__Proteobacteria;c__Gammaproteobacteria;o__Burkholderiales;f__Gallionellaceae;g__Nitrotoga;s__	1.68813e+06	d__Bacteria;p__Proteobacteria;c__Gammaproteobacteria;o__Burkholderiales;f__Gallionellaceae;g__Nitrotoga;s__	GCF_000420545.1	80.3102	0.03	Presence
SLM_LV1_0830-P15	0.8~3.0 um	SAMN40275155	JBCKRI000000000	8058500	7646425	7639786	7639774	239014	670739	63.2215	73	54784	13454	0.556258	19.279	1.72414	687	0.87574	d__Bacteria;p__Proteobacteria;c__Gammaproteobacteria;o__Burkholderiales;f__Gallionellaceae;g__Nitrotoga;s__	3.47912e+06	d__Bacteria;p__Proteobacteria;c__Gammaproteobacteria;o__Burkholderiales;f__Gallionellaceae;g__Nitrotoga;s__	GCA_009885195.1	80.1667	0.42	Absence
SLM_LV1_0208-K10	0.2~0.8 um	SAMN40275156	JBCKRJ000000000	7599079	7152747	7150877	7150763	333069	1056515	55.5197	90	59729	21505	0.547481	39.8119	1.72414	1100	0.867333	d__Bacteria;p__Proteobacteria;c__Gammaproteobacteria;o__Burkholderiales;f__Gallionellaceae;g__Nitrotoga;s__	2.65377e+06	d__Bacteria;p__Proteobacteria;c__Gammaproteobacteria;o__Burkholderiales;f__Gallionellaceae;g__Nitrotoga;s__	GCF_005887615.1	84.7849	0	Presence
SLM_LV1_30a-N14	>3.0 um	SAMN40275157	JBCKRK000000000	10051816	9597705	9594691	9594660	284479	801004	61.2062	82	37970	13536	0.54902	31.8755	1.00685	905	0.868348	d__Bacteria;p__Proteobacteria;c__Gammaproteobacteria;o__Burkholderiales;f__Gallionellaceae;g__Nitrotoga;s__	2.51291e+06	d__Bacteria;p__Proteobacteria;c__Gammaproteobacteria;o__Burkholderiales;f__Gallionellaceae;g__Nitrotoga;s__	GCF_003977615.1	81.3468	0.03	Presence
SLM_LV1_30a-I15	>3.0 um	SAMN40275158	JBCKRL000000000	10382129	9848289	9845718	9845687	142854	383600	68.6483	53	79164	10984	0.555028	17.9252	2.8436	427	0.852013	d__Bacteria;p__Proteobacteria;c__Gammaproteobacteria;o__Burkholderiales;f__Gallionellaceae;g__Nitrotoga;s__	2.14e+06	d__Bacteria;p__Proteobacteria;c__Gammaproteobacteria;o__Burkholderiales;f__Gallionellaceae;g__Nitrotoga;s__	GCA_016218445.1	80.3997	0.45	Absence
SLM_LV1_0208-J04	0.2~0.8 um	SAMN40275159	JBCKRM000000000	8282540	7778972	7777406	7777331	361047	1055673	60.5315	107	37903	16060	0.557371	46.1556	0.473934	1067	0.873207	d__Bacteria;p__Proteobacteria;c__Gammaproteobacteria;o__Burkholderiales;f__Gallionellaceae;g__Nitrotoga;s__	2.2872e+06	d__Bacteria;p__Proteobacteria;c__Gammaproteobacteria;o__Burkholderiales;f__Gallionellaceae;g__Nitrotoga;s__	GCF_001598455.1	84.4179	0.01	Presence
SLM_LV1_30a-P21	>3.0 um	SAMN40275160	JBCKRN000000000	7687548	7325046	7308826	7308825	273578	675478	71.7681	77	38006	13676	0.552062	32.7586	0	734	0.866669	d__Bacteria;p__Proteobacteria;c__Gammaproteobacteria;o__Burkholderiales;f__Gallionellaceae;g__Nitrotoga;s__	2.06199e+06	d__Bacteria;p__Proteobacteria;c__Gammaproteobacteria;o__Burkholderiales;f__Gallionellaceae;g__Nitrotoga;s__	GCF_018603885.1	83.6797	0.01	Presence
SLM_LV1_0208-M15	0.2~0.8 um	SAMN40275161	JBCKRO000000000	9857912	9309512	9307126	9306280	127815	309258	68.3377	57	27650	6593	0.554854	11.4241	0.473934	344	0.848091	d__Bacteria;p__Proteobacteria;c__Gammaproteobacteria;o__Burkholderiales;f__Gallionellaceae;g__Nitrotoga;s__	2.70707e+06	d__Bacteria;p__Proteobacteria;c__Gammaproteobacteria;o__Burkholderiales;f__Gallionellaceae;g__Nitrotoga;s__	GCA_009885195.1	80.7932	0.47	Absence
SLM_LV1_0830-B22	0.8~3.0 um	SAMN40275162	JBCKRP000000000	11359723	10717459	10711799	10711691	370090	971606	67.1645	97	59230	16601	0.554774	37.931	0	1024	0.871447	d__Bacteria;p__Proteobacteria;c__Gammaproteobacteria;o__Burkholderiales;f__Gallionellaceae;g__Nitrotoga;s__	2.56151e+06	d__Bacteria;p__Proteobacteria;c__Gammaproteobacteria;o__Burkholderiales;f__Gallionellaceae;g__Nitrotoga;s__	GCF_003633755.1	81.097	0	Absence
SLM_LV1_0830-N18	0.8~3.0 um	SAMN40275163	JBCKRQ000000000	7611733	7247480	7244710	7244707	428622	1143212	65.0509	99	46835	17741	0.556607	59.1936	0.473934	1139	0.876891	d__Bacteria;p__Proteobacteria;c__Gammaproteobacteria;o__Burkholderiales;f__Gallionellaceae;g__Nitrotoga;s__	1.93131e+06	d__Bacteria;p__Proteobacteria;c__Gammaproteobacteria;o__Burkholderiales;f__Gallionellaceae;g__Nitrotoga;s__	GCA_003551745.1	80.2158	0.01	Absence
SLM_LV1_0208-J02	0.2~0.8 um	SAMN40275164	JBCKRR000000000	9720101	9092375	9090644	9090522	149630	377392	62.9299	65	23264	7459	0.549601	20.6897	0	405	0.857035	d__Bacteria;p__Proteobacteria;c__Gammaproteobacteria;o__Burkholderiales;f__Gallionellaceae;g__;s__	1.82406e+06	d__Bacteria;p__Proteobacteria;c__Gammaproteobacteria;o__Burkholderiales;f__Gallionellaceae;g__Nitrotoga;s__	GCA_009885195.1	79.6717	0.48	Absence
SLM_LV1_0208-P01	0.2~0.8 um	SAMN40275165	JBCKRS000000000	9572155	9037945	9036254	9036104	238609	624483	65.2728	77	33432	11045	0.552806	17.7083	0	643	0.873223	d__Bacteria;p__Proteobacteria;c__Gammaproteobacteria;o__Burkholderiales;f__Gallionellaceae;g__Nitrotoga;s__	3.52649e+06	d__Bacteria;p__Proteobacteria;c__Gammaproteobacteria;o__Burkholderiales;f__Gallionellaceae;g__Nitrotoga;s__	GCA_009885195.1	80.3598	0.39	Absence
SLM_LV1_0208-O15	0.2~0.8 um	SAMN40275166	JBCKRT000000000	8374638	7926684	7923624	7923603	91733	234622	65.0597	41	16195	7250	0.552923	11.2069	0	264	0.867331	d__Bacteria;p__Proteobacteria;c__Gammaproteobacteria;o__Burkholderiales;f__Gallionellaceae;g__Nitrotoga;s__	2.09355e+06	d__Bacteria;p__Proteobacteria;c__Gammaproteobacteria;o__Burkholderiales;f__Gallionellaceae;g__Nitrotoga;s__	GCA_009885195.1	79.9433	0.41	Absence
SLM_LV1_0208-N11	0.2~0.8 um	SAMN40275167	JBCKRU000000000	7936587	7448009	7445444	7445215	139112	359144	64.0502	70	25502	5525	0.558055	11.3793	0	404	0.884331	d__Bacteria;p__Proteobacteria;c__Gammaproteobacteria;o__Burkholderiales;f__Gallionellaceae;g__;s__	3.15611e+06	d__Bacteria;p__Proteobacteria;c__Gammaproteobacteria;o__Burkholderiales;f__Gallionellaceae;g__Nitrotoga;s__	GCA_009885195.1	80.2826	0.39	Absence
SLM_LV1_0830-A11	0.8~3.0 um	SAMN40275168	JBCKRV000000000	10155168	9544851	9542295	9542252	234479	627624	63.1432	71	32913	11971	0.549898	29.3179	0	661	0.882173	d__Bacteria;p__Proteobacteria;c__Gammaproteobacteria;o__Burkholderiales;f__Gallionellaceae;g__Nitrotoga;s__	2.14075e+06	d__Bacteria;p__Proteobacteria;c__Gammaproteobacteria;o__Burkholderiales;f__Gallionellaceae;g__Nitrotoga;s__	GCA_009885195.1	80.4859	0.37	Presence
SLM_LV1_30a-G03	>3.0 um	SAMN40275169	JBCKRW000000000	9679530	9149221	9146989	9146982	306542	758266	67.1469	91	63615	12206	0.555996	40.4019	0.947867	801	0.858815	d__Bacteria;p__Proteobacteria;c__Gammaproteobacteria;o__Burkholderiales;f__Gallionellaceae;g__Nitrotoga;s__	1.87681e+06	d__Bacteria;p__Proteobacteria;c__Gammaproteobacteria;o__Burkholderiales;f__Gallionellaceae;g__Nitrotoga;s__	GCF_902829245.1	80.6508	0.03	Presence
SLM_MC1B_46-C08	4~6 cm	SAMN40275170	JBCKRX000000000	10755545	10173987	10168431	10168429	283258	853927	58.301	78	81021	16745	0.553212	42.7116	0	864	0.869054	d__Bacteria;p__Proteobacteria;c__Gammaproteobacteria;o__Burkholderiales;f__Gallionellaceae;g__Nitrotoga;s__	1.99928e+06	d__Bacteria;p__Proteobacteria;c__Gammaproteobacteria;o__Burkholderiales;f__Gallionellaceae;g__Nitrotoga;s__	GCA_009885195.1	80.3155	0.39	Presence
SLM_LV1_02b-L21	<0.2 um	SAMN40275171	JBCKRY000000000	7803744	7299917	7296266	7296253	269893	720907	63.7045	90	35116	11068	0.553424	42.7273	0	772	0.877864	d__Bacteria;p__Proteobacteria;c__Gammaproteobacteria;o__Burkholderiales;f__Gallionellaceae;g__Nitrotoga;s__	1.68723e+06	d__Bacteria;p__Proteobacteria;c__Gammaproteobacteria;o__Burkholderiales;f__Gallionellaceae;g__Nitrotoga;s__	GCA_003605175.1	84.0904	0.01	Presence
SLM_MC1B_24-O15	2~4 cm	SAMN40275172	JBCKRZ000000000	7514213	7104594	7101809	7101609	732728	1706518	76.6021	114	85065	23987	0.559325	82.231	0.421274	1689	0.873552	d__Bacteria;p__Proteobacteria;c__Gammaproteobacteria;o__Burkholderiales;f__Gallionellaceae;g__Nitrotoga;s__	2.07527e+06	d__Bacteria;p__Proteobacteria;c__Gammaproteobacteria;o__Burkholderiales;f__Gallionellaceae;g__Nitrotoga;s__	GCA_014237695.1	83.5307	0.01	Presence
SLM_MC1B_24-K02	2~4 cm	SAMN40275173	JBCKSA000000000	7658066	7228511	7225838	7225759	336136	986708	58.5774	94	79732	14118	0.558768	42.9383	0.331754	1022	0.871752	d__Bacteria;p__Proteobacteria;c__Gammaproteobacteria;o__Burkholderiales;f__Gallionellaceae;g__Nitrotoga;s__	2.29797e+06	d__Bacteria;p__Proteobacteria;c__Gammaproteobacteria;o__Burkholderiales;f__Gallionellaceae;g__Nitrotoga;s__	GCF_018854775.1	82.216	0.01	Presence
SLM_MC1B_24-M13	2~4 cm	SAMN40275174	JBCKSB000000000	9055309	8546568	8542820	8542730	610319	1481459	72.6789	107	68356	26976	0.560363	66.4332	0.0947867	1498	0.865767	d__Bacteria;p__Proteobacteria;c__Gammaproteobacteria;o__Burkholderiales;f__Gallionellaceae;g__Nitrotoga;s__	2.23e+06	d__Bacteria;p__Proteobacteria;c__Gammaproteobacteria;o__Burkholderiales;f__Gallionellaceae;g__Nitrotoga;s__	GCA_009885195.1	80.8197	0.39	Presence
SLM_LV1_BS-L15	BulkSediment	SAMN40275175	JBCKSC000000000	8824866	8331297	8329237	8329211	190202	473309	71.9392	21	112572	33546	0.558451	15.5172	0	477	0.859766	d__Bacteria;p__Proteobacteria;c__Gammaproteobacteria;o__Burkholderiales;f__Gallionellaceae;g__Nitrotoga;s__	3.05021e+06	d__Bacteria;p__Proteobacteria;c__Gammaproteobacteria;o__Burkholderiales;f__Gallionellaceae;g__Nitrotoga;s__	GCA_009885195.1	81.0521	0.36	Absence
SLM_MC1B_24-O14	2~4 cm	SAMN40275176	JBCKSD000000000	7526822	7108322	7104136	7103977	356825	913073	68.8664	70	50520	21977	0.556573	47.4138	1.72414	905	0.867187	d__Bacteria;p__Proteobacteria;c__Gammaproteobacteria;o__Burkholderiales;f__Gallionellaceae;g__Nitrotoga;s__	1.92575e+06	d__Bacteria;p__Proteobacteria;c__Gammaproteobacteria;o__Burkholderiales;f__Gallionellaceae;g__Nitrotoga;s__	GCA_009885195.1	80.3619	0.43	Absence
SLM_MC1B_24-N09	2~4 cm	SAMN40275177	JBCKSE000000000	7172704	6806090	6797455	6797355	300729	789400	63.8642	88	60571	13109	0.562569	38.9815	0	869	0.87431	d__Bacteria;p__Proteobacteria;c__Gammaproteobacteria;o__Burkholderiales;f__Gallionellaceae;g__Nitrotoga;s__	2.02506e+06	d__Bacteria;p__Proteobacteria;c__Gammaproteobacteria;o__Burkholderiales;f__Gallionellaceae;g__Nitrotoga;s__	GCA_009885195.1	80.7165	0.41	Absence
SLM_MC1B_46-N05	4~6 cm	SAMN40275178	JBCKSF000000000	9044947	8533264	8529752	8529714	382665	1010844	65.3914	98	44835	16786	0.559098	45.251	0.911006	1054	0.870593	d__Bacteria;p__Proteobacteria;c__Gammaproteobacteria;o__Burkholderiales;f__Gallionellaceae;g__Nitrotoga;s__	2.23386e+06	d__Bacteria;p__Proteobacteria;c__Gammaproteobacteria;o__Burkholderiales;f__Gallionellaceae;g__Nitrotoga;s__	GCF_001425325.1	80.9966	0	Presence
SLM_MC1B_68-I15	6~8 cm	SAMN40275179	JBCKSG000000000	6740663	6388032	6387020	6387015	204341	505534	66.9158	71	26043	9188	0.552744	29.5809	0	543	0.860055	d__Bacteria;p__Proteobacteria;c__Gammaproteobacteria;o__Burkholderiales;f__Gallionellaceae;g__Nitrotoga;s__	1.70899e+06	d__Bacteria;p__Proteobacteria;c__Gammaproteobacteria;o__Burkholderiales;f__Gallionellaceae;g__Nitrotoga;s__	GCA_009885195.1	79.6569	0.5	Presence
SLM_MC1B_02-E17	0~2 cm	SAMN40275180	JBCKSH000000000	9271470	8545175	8539740	8539675	509214	1311296	66.7272	107	50925	19576	0.557963	66.3793	0	1394	0.871293	d__Bacteria;p__Proteobacteria;c__Gammaproteobacteria;o__Burkholderiales;f__Gallionellaceae;g__Nitrotoga;s__	1.97546e+06	d__Bacteria;p__Proteobacteria;c__Gammaproteobacteria;o__Burkholderiales;f__Gallionellaceae;g__Nitrotoga;s__	GCA_014237695.1	83.5307	0.01	Presence
SLM_MC1B_24-M11	2~4 cm	SAMN40275181	JBCKSI000000000	8419005	7913449	7899268	7899194	529998	1341921	69.1538	107	68804	24189	0.56219	69.1376	0.947867	1321	0.877591	d__Bacteria;p__Proteobacteria;c__Gammaproteobacteria;o__Burkholderiales;f__Gallionellaceae;g__Nitrotoga;s__	1.94094e+06	d__Bacteria;p__Proteobacteria;c__Gammaproteobacteria;o__Burkholderiales;f__Gallionellaceae;g__Nitrotoga;s__	GCF_017876515.1	83.6311	0.01	Presence
SLM_MC1B_02-I05	0~2 cm	SAMN40275182	JBCKSJ000000000	8146274	7742851	7739507	7739503	576273	1521443	66.7763	125	73504	17736	0.557298	73.9964	0.73723	1552	0.873007	d__Bacteria;p__Proteobacteria;c__Gammaproteobacteria;o__Burkholderiales;f__Gallionellaceae;g__Nitrotoga;s__	2.0561e+06	d__Bacteria;p__Proteobacteria;c__Gammaproteobacteria;o__Burkholderiales;f__Gallionellaceae;g__Nitrotoga;s__	GCA_014237695.1	84.1644	0	Presence
SLM_MC1B_24-F20	2~4 cm	SAMN40275183	JBCKSK000000000	7787027	7410496	7404033	7403970	694824	1663977	74.7311	90	126855	32322	0.560192	78.1433	0.805687	1657	0.872889	d__Bacteria;p__Proteobacteria;c__Gammaproteobacteria;o__Burkholderiales;f__Gallionellaceae;g__Nitrotoga;s__	2.12939e+06	d__Bacteria;p__Proteobacteria;c__Gammaproteobacteria;o__Burkholderiales;f__Gallionellaceae;g__Nitrotoga;s__	GCF_000023105.1	83.7848	0	Presence
SLM_MC1B_46-O13	4~6 cm	SAMN40275184	JBCKSL000000000	7046887	6632551	6630321	6629337	385630	1073038	62.9748	91	70619	20826	0.555506	48.0357	0.342285	1121	0.870937	d__Bacteria;p__Proteobacteria;c__Gammaproteobacteria;o__Burkholderiales;f__Gallionellaceae;g__Nitrotoga;s__	2.23383e+06	d__Bacteria;p__Proteobacteria;c__Gammaproteobacteria;o__Burkholderiales;f__Gallionellaceae;g__Nitrotoga;s__	GCA_000733915.1	81.8179	0.01	Presence
SLM_MC1B_02-D05	0~2 cm	SAMN40275185	JBCKSM000000000	7557512	7089934	7086907	7086888	329797	960402	59.8695	98	35135	14686	0.558885	49.2805	0.473934	979	0.868239	d__Bacteria;p__Proteobacteria;c__Gammaproteobacteria;o__Burkholderiales;f__Gallionellaceae;g__Nitrotoga;s__	1.94885e+06	d__Bacteria;p__Proteobacteria;c__Gammaproteobacteria;o__Burkholderiales;f__Gallionellaceae;g__Nitrotoga;s__	GCA_009885195.1	80.361	0.44	Presence
SLM_MC1B_24-M18	2~4 cm	SAMN40275186	JBCKSN000000000	8460795	8020117	8010908	8010780	156505	374183	75.2267	27	75960	19738	0.561648	24.1379	0	355	0.854101	d__Bacteria;p__Proteobacteria;c__Gammaproteobacteria;o__Burkholderiales;f__Gallionellaceae;g__Nitrotoga;s__	1.55019e+06	d__Bacteria;p__Proteobacteria;c__Gammaproteobacteria;o__Burkholderiales;f__Gallionellaceae;g__Nitrotoga;s__	GCF_015209725.1	83.5955	0.06	Presence
SLM_MC1B_24-M03	2~4 cm	SAMN40275187	JBCKSO000000000	8288597	7799008	7761417	7761348	173663	400248	72.3048	49	37732	12137	0.572423	15.6788	0	400	0.893004	d__Bacteria;p__Proteobacteria;c__Gammaproteobacteria;o__Burkholderiales;f__Gallionellaceae;g__Nitrotoga;s__	2.55279e+06	d__Bacteria;p__Proteobacteria;c__Gammaproteobacteria;o__Burkholderiales;f__Gallionellaceae;g__Nitrotoga;s__	GCA_009885195.1	80.2618	0.58	Absence
SLM_MC1B_24-G15	2~4 cm	SAMN40275188	JBCKSP000000000	7224000	6785691	6782106	6781929	340309	990767	60.5929	96	40283	14776	0.555471	47.8905	2.1485	1022	0.86337	d__Bacteria;p__Proteobacteria;c__Gammaproteobacteria;o__Burkholderiales;f__Gallionellaceae;g__Nitrotoga;s__	2.06882e+06	d__Bacteria;p__Proteobacteria;c__Gammaproteobacteria;o__Burkholderiales;f__Gallionellaceae;g__Nitrotoga;s__	GCA_016742215.1	83.0306	0.03	Presence
SLM_MC1B_68-O06	6~8 cm	SAMN40275189	JBCKSQ000000000	9937709	9374195	9368502	9368491	475661	1147509	72.5181	96	62509	16343	0.560224	54.96	0.0947867	1187	0.866052	d__Bacteria;p__Proteobacteria;c__Gammaproteobacteria;o__Burkholderiales;f__Gallionellaceae;g__Nitrotoga;s__	2.0879e+06	d__Bacteria;p__Proteobacteria;c__Gammaproteobacteria;o__Burkholderiales;f__Gallionellaceae;g__Nitrotoga;s__	GCA_009885195.1	80.5492	0.44	Presence
SLM_MC1B_02-G20	0~2 cm	SAMN40275190	JBCKSR000000000	9414113	8843518	8838323	8838323	371254	971843	66.5029	95	83366	14709	0.55539	43.049	0	1025	0.869406	d__Bacteria;p__Proteobacteria;c__Gammaproteobacteria;o__Burkholderiales;f__Gallionellaceae;g__Nitrotoga;s__	2.25753e+06	d__Bacteria;p__Proteobacteria;c__Gammaproteobacteria;o__Burkholderiales;f__Gallionellaceae;g__Nitrotoga;s__	GCF_003345525.1	85.9802	0	Presence
SLM_LV1_BS-J04	BulkSediment	SAMN40275191	JBCKSS000000000	9495369	8989082	8987226	8987218	363293	1021602	63.0951	88	72982	18287	0.559246	29.3103	0	1064	0.868717	d__Bacteria;p__Proteobacteria;c__Gammaproteobacteria;o__Burkholderiales;f__Gallionellaceae;g__Nitrotoga;s__	3.48547e+06	d__Bacteria;p__Proteobacteria;c__Gammaproteobacteria;o__Burkholderiales;f__Gallionellaceae;g__Nitrotoga;s__	GCF_014174375.1	81.3087	0.02	Presence
SLM_MC1B_810-D14	8~10 cm	SAMN40275192	JBCKST000000000	8255890	7608731	7606780	7606672	84485	166164	63.328	39	17310	4187	0.556107	8.23973	0	193	0.850455	d__Bacteria;p__Proteobacteria;c__Gammaproteobacteria;o__Burkholderiales;f__Gallionellaceae;g__Nitrotoga;s__	2.01662e+06	d__Bacteria;p__Proteobacteria;c__Gammaproteobacteria;o__Burkholderiales;f__Gallionellaceae;g__Nitrotoga;s__				Absence
SLM_LV1_0830-J10	0.8~3.0 um	SAMN40275193	JBCKSU000000000	10890045	10077381	10064205	10064193	173215	460950	62.5866	75	26100	7179	0.555386	24.8251	0.7109	491	0.856896	d__Bacteria;p__Proteobacteria;c__Gammaproteobacteria;o__Burkholderiales;f__Gallionellaceae;g__Nitrotoga;s__	1.85679e+06	d__Bacteria;p__Proteobacteria;c__Gammaproteobacteria;o__Burkholderiales;f__Gallionellaceae;g__Nitrotoga;s__	GCA_009885195.1	80.813	0.49	Presence
SLM_LV1_30a-P19	>3.0 um	SAMN40275194	JBCKSV000000000	11047935	10508658	10506955	10506949	182423	523468	61.3373	70	39875	9329	0.553111	27.5546	0.645076	556	0.861017	d__Bacteria;p__Proteobacteria;c__Gammaproteobacteria;o__Burkholderiales;f__Gallionellaceae;g__Nitrotoga;s__	1.89975e+06	d__Bacteria;p__Proteobacteria;c__Gammaproteobacteria;o__Burkholderiales;f__Gallionellaceae;g__Nitrotoga;s__	GCA_016218445.1	80.0218	0.44	Absence
SLM_LV1_0208-A11	0.2~0.8 um	SAMN40275195	JBCKSW000000000	9204903	8619561	8615980	8615970	75775	185791	64.6452	34	16076	7073	0.544677	6.7993	0.7109	229	0.849896	d__Bacteria;p__Proteobacteria;c__Gammaproteobacteria;o__Burkholderiales;f__Gallionellaceae;g__Nitrotoga;s__	2.7325e+06	d__Bacteria;p__Proteobacteria;c__Gammaproteobacteria;o__Burkholderiales;f__Gallionellaceae;g__Nitrotoga;s__				Absence
SLM_MC1B_24-E02	2~4 cm	SAMN40275196	JBCKSX000000000	8946133	8563318	8560663	8560653	185428	474910	70.3275	27	70567	37139	0.560022	32.7586	0	487	0.870965	d__Bacteria;p__Proteobacteria;c__Gammaproteobacteria;o__Burkholderiales;f__Gallionellaceae;g__Nitrotoga;s__	1.44973e+06	d__Bacteria;p__Proteobacteria;c__Gammaproteobacteria;o__Burkholderiales;f__Gallionellaceae;g__Nitrotoga;s__	GCA_016218445.1	79.9816	0.4	Absence
SLM_LV1_02b-L06	<0.2 um	SAMN40275197	JBCKSY000000000	9173480	8544172	8538433	8538414	180164	420177	66.099	68	28624	7845	0.553372	21.4778	0	445	0.85523	d__Bacteria;p__Proteobacteria;c__Gammaproteobacteria;o__Burkholderiales;f__Gallionellaceae;g__Nitrotoga;s__	1.95633e+06	d__Bacteria;p__Proteobacteria;c__Gammaproteobacteria;o__Burkholderiales;f__Gallionellaceae;g__Nitrotoga;s__	GCA_009885195.1	80.2254	0.55	Presence
SLM_LV1_0208-O06	0.2~0.8 um	SAMN40275198	JBCKSZ000000000	7981567	7547357	7525234	7525149	183183	531366	61.8861	64	38284	11918	0.55636	28.3939	0.974197	550	0.85704	d__Bacteria;p__Proteobacteria;c__Gammaproteobacteria;o__Burkholderiales;f__Gallionellaceae;g__Nitrotoga;s__	1.87141e+06	d__Bacteria;p__Proteobacteria;c__Gammaproteobacteria;o__Burkholderiales;f__Gallionellaceae;g__Nitrotoga;s__	GCF_006385595.1	81.5303	0.04	Presence
SLM_LV1_BS-G06	BulkSediment	SAMN40275199	JBCKTA000000000	9229722	8694565	8693216	8693211	288989	855095	58.6999	88	36371	16718	0.550808	42.9441	0.35545	871	0.863639	d__Bacteria;p__Proteobacteria;c__Gammaproteobacteria;o__Burkholderiales;f__Gallionellaceae;g__Nitrotoga;s__	1.99118e+06	d__Bacteria;p__Proteobacteria;c__Gammaproteobacteria;o__Burkholderiales;f__Gallionellaceae;g__Nitrotoga;s__	GCA_009885195.1	80.1195	0.46	Presence
SLM_LV1_30a-M18	>3.0 um	SAMN40275200	JBCKTB000000000	7882549	7397124	7396114	7395697	138116	408733	56.1889	68	26727	7635	0.58088	17.7586	1.72414	466	0.870769	d__Bacteria;p__Proteobacteria;c__Gammaproteobacteria;o__Burkholderiales;f__Gallionellaceae;g__Nitrotoga;s__	2.3016e+06	d__Bacteria;p__Proteobacteria;c__Gammaproteobacteria;o__Burkholderiales;f__Gallionellaceae;g__Nitrotoga;s__	GCA_009885195.1	80.2373	0.33	Absence
SLM_LV1_0208-A05	0.2~0.8 um	SAMN40275201	JBCKTC000000000	8663433	7943526	7941582	7941495	247269	794299	55.6264	77	54697	16988	0.555755	41.5585	0.947867	819	0.877507	d__Bacteria;p__Proteobacteria;c__Gammaproteobacteria;o__Burkholderiales;f__Gallionellaceae;g__Nitrotoga;s__	1.91128e+06	d__Bacteria;p__Proteobacteria;c__Gammaproteobacteria;o__Burkholderiales;f__Gallionellaceae;g__Nitrotoga;s__	GCA_009885195.1	80.5035	0.45	Absence
SLM_LV1_0208-N20	0.2~0.8 um	SAMN40275202	JBCKTD000000000	8190852	7747679	7745996	7745918	256605	774776	59.6385	94	44267	10189	0.556594	45.617	3.60615	835	0.87214	d__Bacteria;p__Proteobacteria;c__Gammaproteobacteria;o__Burkholderiales;f__Gallionellaceae;g__Nitrotoga;s__	1.69844e+06	d__Bacteria;p__Proteobacteria;c__Gammaproteobacteria;o__Burkholderiales;f__Gallionellaceae;g__Nitrotoga;s__	GCA_009885195.1	80.4492	0.42	Absence
SLM_LV1_30a-D08	>3.0 um	SAMN40275203	JBCKTE000000000	10463551	9809256	9805260	9805222	180204	428843	70.5886	53	34635	16355	0.558102	5.17241	0	450	0.868136	d__Bacteria;p__Proteobacteria;c__Gammaproteobacteria;o__Burkholderiales;f__Gallionellaceae;g__Nitrotoga;s__	8.29096e+06	d__Bacteria;p__Proteobacteria;c__Gammaproteobacteria;o__Burkholderiales;f__Gallionellaceae;g__Nitrotoga;s__	GCA_009885195.1	79.9018	0.47	Absence
SLM_LV1_0830-K04	0.8~3.0 um	SAMN40275204	JBCKTF000000000	10465954	9685778	9678441	9678413	155579	399227	64.6619	60	17918	8232	0.562121	31.0345	0	422	0.847205	d__Bacteria;p__Proteobacteria;c__Gammaproteobacteria;o__Burkholderiales;f__Gallionellaceae;g__Nitrotoga;s__	1.2864e+06	d__Bacteria;p__Proteobacteria;c__Gammaproteobacteria;o__Burkholderiales;f__Gallionellaceae;g__Nitrotoga;s__	GCA_009885195.1	80.4054	0.44	Absence
SLM_LV1_0208-N06	0.2~0.8 um	SAMN40275205	JBCKTG000000000	9916898	9334550	9330695	9330583	174580	423659	62.6098	71	25326	6828	0.552451	15.047	0	455	0.868918	d__Bacteria;p__Proteobacteria;c__Gammaproteobacteria;o__Burkholderiales;f__Gallionellaceae;g__Nitrotoga;s__	2.81557e+06	d__Bacteria;p__Proteobacteria;c__Gammaproteobacteria;o__Burkholderiales;f__Gallionellaceae;g__Nitrotoga;s__	GCA_016218445.1	79.9783	0.39	Presence
SLM_LV1_0830-D15	0.8~3.0 um	SAMN40275206	JBCKTH000000000	10628869	9959811	9955558	9955479	175758	396413	68.6997	57	25380	9158	0.552729	14.6147	0	452	0.855434	d__Bacteria;p__Proteobacteria;c__Gammaproteobacteria;o__Burkholderiales;f__Gallionellaceae;g__Nitrotoga;s__	2.71242e+06	d__Bacteria;p__Proteobacteria;c__Gammaproteobacteria;o__Burkholderiales;f__Gallionellaceae;g__Nitrotoga;s__	GCA_009885195.1	79.8123	0.38	Absence
SLM_LV1_30a-D19	>3.0 um	SAMN40275207	JBCKTI000000000	10990589	10407030	10389906	10389903	262066	765671	61.532	75	75348	15839	0.548139	29.2531	0.947867	789	0.887674	d__Bacteria;p__Proteobacteria;c__Gammaproteobacteria;o__Burkholderiales;f__Gallionellaceae;g__Nitrotoga;s__	2.6174e+06	d__Bacteria;p__Proteobacteria;c__Gammaproteobacteria;o__Burkholderiales;f__Gallionellaceae;g__Nitrotoga;s__	GCA_009885195.1	80.0699	0.39	Presence
SLM_LV1_30a-K04	>3.0 um	SAMN40275208	JBCKTJ000000000	6826256	6337135	6332111	6332053	180407	471346	64.1274	62	28195	10030	0.550916	18.3386	0	504	0.870165	d__Bacteria;p__Proteobacteria;c__Gammaproteobacteria;o__Burkholderiales;f__Gallionellaceae;g__;s__	2.57025e+06	d__Bacteria;p__Proteobacteria;c__Gammaproteobacteria;o__Burkholderiales;f__Gallionellaceae;g__Nitrotoga;s__	GCA_009885195.1	80.0069	0.39	Presence
SLM_LV1_0830-O05	0.8~3.0 um	SAMN40275209	JBCKTK000000000	8184316	7713885	7686517	7686090	325268	785377	70.6217	72	50568	16815	0.55691	34.5835	0.738779	832	0.889221	d__Bacteria;p__Proteobacteria;c__Gammaproteobacteria;o__Burkholderiales;f__Gallionellaceae;g__Nitrotoga;s__	2.27096e+06	d__Bacteria;p__Proteobacteria;c__Gammaproteobacteria;o__Burkholderiales;f__Gallionellaceae;g__Nitrotoga;s__	GCF_900109205.1	83.6565	0	Absence
SLM_LV1_30a-L15	>3.0 um	SAMN40275210	JBCKTL000000000	7905543	7430388	7428263	7428227	218445	554731	68.4047	63	33333	13292	0.554184	29.4155	0	586	0.897574	d__Bacteria;p__Proteobacteria;c__Gammaproteobacteria;o__Burkholderiales;f__Gallionellaceae;g__Nitrotoga;s__	1.88585e+06	d__Bacteria;p__Proteobacteria;c__Gammaproteobacteria;o__Burkholderiales;f__Gallionellaceae;g__Nitrotoga;s__	GCA_009885195.1	80.2186	0.44	Absence
SLM_MC1B_02-G11	0~2 cm	SAMN40275211	JBCKTM000000000	8941187	8447769	8445548	8445534	354755	1001371	63.1548	81	53436	18857	0.548531	46.1349	0	1052	0.86365	d__Bacteria;p__Proteobacteria;c__Gammaproteobacteria;o__Burkholderiales;f__Gallionellaceae;g__Nitrotoga;s__	2.17053e+06	d__Bacteria;p__Proteobacteria;c__Gammaproteobacteria;o__Burkholderiales;f__Gallionellaceae;g__Nitrotoga;s__	GCF_017798165.1	80.5625	0.03	Presence
SLM_LV1_0208-D02	0.2~0.8 um	SAMN40275212	JBCKTN000000000	10092019	9439254	9436677	9436627	167212	422259	63.4437	73	19625	7618	0.549556	12.069	0	449	0.855063	d__Bacteria;p__Proteobacteria;c__Gammaproteobacteria;o__Burkholderiales;f__Gallionellaceae;g__Nitrotoga;s__	3.49872e+06	d__Bacteria;p__Proteobacteria;c__Gammaproteobacteria;o__Burkholderiales;f__Gallionellaceae;g__Nitrotoga;s__	GCF_002895945.1	82.4975	0.04	Presence
SLM_MC1B_68-I20	6~8 cm	SAMN40275213	JBCKTO000000000	8674337	8210052	8207226	8207211	346252	880071	67.1963	98	48748	11740	0.54781	43.3689	0.473934	931	0.851518	d__Bacteria;p__Proteobacteria;c__Gammaproteobacteria;o__Burkholderiales;f__Gallionellaceae;g__Nitrotoga;s__	2.02927e+06	d__Bacteria;p__Proteobacteria;c__Gammaproteobacteria;o__Burkholderiales;f__Gallionellaceae;g__Nitrotoga;s__	GCA_009885195.1	79.6238	0.4	Presence
SLM_LV1_30a-B17	>3.0 um	SAMN40275214	JBCKTP000000000	7578325	7153585	7151137	7151132	196024	453934	66.6664	63	37120	10042	0.551992	21.843	0	518	0.86074	d__Bacteria;p__Proteobacteria;c__Gammaproteobacteria;o__Burkholderiales;f__Gallionellaceae;g__Nitrotoga;s__	2.07817e+06	d__Bacteria;p__Proteobacteria;c__Gammaproteobacteria;o__Burkholderiales;f__Gallionellaceae;g__Nitrotoga;s__	GCA_009885195.1	80.2788	0.46	Presence
SLM_LV1_0830-D20	0.8~3.0 um	SAMN40275215	JBCKTQ000000000	10392208	9809582	9806546	9806535	246487	596278	67.5275	83	25675	10408	0.544088	22.7198	0	626	0.873004	d__Bacteria;p__Proteobacteria;c__Gammaproteobacteria;o__Burkholderiales;f__Gallionellaceae;g__Nitrotoga;s__	2.62449e+06	d__Bacteria;p__Proteobacteria;c__Gammaproteobacteria;o__Burkholderiales;f__Gallionellaceae;g__Nitrotoga;s__	GCA_009885195.1	79.7658	0.41	Absence
SLM_LV1_0830-K09	0.8~3.0 um	SAMN40275216	JBCKTR000000000	9234910	8690446	8689260	8689257	225873	532129	64.1016	86	25820	8198	0.501831	27.0115	0	641	0.827931	d__Bacteria;p__Proteobacteria;c__Gammaproteobacteria;o__Burkholderiales;f__Gallionellaceae;g__Nitrotoga;s__	1.97001e+06	d__Bacteria;p__Proteobacteria;c__Gammaproteobacteria;o__Burkholderiales;f__Gallionellaceae;g__Nitrotoga;s__	GCF_013168275.1	85.7023	0.63	Absence
SLM_LV1_30a-P07	>3.0 um	SAMN40275217	JBCKTS000000000	9811488	9271787	9270438	9270412	375810	1076923	62.8855	114	67534	13062	0.498828	33.5896	2.8436	1135	0.877763	d__Bacteria;p__Proteobacteria;c__Gammaproteobacteria;o__Burkholderiales;f__Gallionellaceae;g__39-52-133;s__	3.20612e+06	d__Bacteria;p__Proteobacteria;c__Gammaproteobacteria;o__Burkholderiales;f__Gallionellaceae;g__39-52-133;s__	GCA_002278935.1	79.3723	0.43	Presence
SLM_LV1_0830-I20	0.8~3.0 um	SAMN40275218	JBCKTT000000000	8375073	7910156	7908256	7908245	181497	404405	72.2522	71	23631	6112	0.505251	10.3448	1.72414	419	0.884932	d__Bacteria;p__Proteobacteria;c__Gammaproteobacteria;o__Burkholderiales;f__Gallionellaceae;g__39-52-133;s__	3.90925e+06	d__Bacteria;p__Proteobacteria;c__Gammaproteobacteria;o__Burkholderiales;f__Gallionellaceae;g__39-52-133;s__				Absence
SLM_LV1_0830-N02	0.8~3.0 um	SAMN40275219	JBCKTU000000000	7522206	7110302	7108737	7108729	359719	997753	61.6201	97	36337	14937	0.500299	34.0115	0	1003	0.867762	d__Bacteria;p__Proteobacteria;c__Gammaproteobacteria;o__Burkholderiales;f__Gallionellaceae;g__39-52-133;s__	2.93358e+06	d__Bacteria;p__Proteobacteria;c__Gammaproteobacteria;o__Burkholderiales;f__Gallionellaceae;g__39-52-133;s__	GCA_002278935.1	79.1583	0.43	Presence
SLM_LV1_0830-G10	0.8~3.0 um	SAMN40275220	JBCKTV000000000	8065691	7486144	7482288	7482249	535718	1732246	55.6889	75	80989	48510	0.495078	73.3676	0.0278784	1679	0.898868	d__Bacteria;p__Proteobacteria;c__Gammaproteobacteria;o__Burkholderiales;f__Gallionellaceae;g__39-52-133;s__	2.36105e+06	d__Bacteria;p__Proteobacteria;c__Gammaproteobacteria;o__Burkholderiales;f__Gallionellaceae;g__39-52-133;s__	GCF_003024605.1	80.2801	0.01	Presence
SLM_LV1_30a-D17	>3.0 um	SAMN40275221	JBCKTW000000000	10221651	9694806	9692578	9692562	314141	882414	63.1024	93	70713	13218	0.508819	37.1784	0.758294	929	0.879589	d__Bacteria;p__Proteobacteria;c__Gammaproteobacteria;o__Burkholderiales;f__Gallionellaceae;g__39-52-133;s__	2.37346e+06	d__Bacteria;p__Proteobacteria;c__Gammaproteobacteria;o__Burkholderiales;f__Gallionellaceae;g__39-52-133;s__	GCF_907164845.1	80.8918	0.02	Presence
SLM_LV1_0208-A22	0.2~0.8 um	SAMN40275222	JBCKTX000000000	6721721	6277568	6276119	6276094	238296	680318	60.4991	78	30136	12434	0.508608	31.7734	0	702	0.880903	d__Bacteria;p__Proteobacteria;c__Gammaproteobacteria;o__Burkholderiales;f__Gallionellaceae;g__39-52-133;s__	2.14116e+06	d__Bacteria;p__Proteobacteria;c__Gammaproteobacteria;o__Burkholderiales;f__Gallionellaceae;g__39-52-133;s__	GCA_002278935.1	79.666	0.54	Presence
SLM_LV1_0830-J03	0.8~3.0 um	SAMN40275223	JBCKTY000000000	8504901	8049654	8048321	8048312	323621	936086	60.4526	67	62807	18190	0.508333	46.3605	0	949	0.862702	d__Bacteria;p__Proteobacteria;c__Gammaproteobacteria;o__Burkholderiales;f__Gallionellaceae;g__39-52-133;s__	2.01914e+06	d__Bacteria;p__Proteobacteria;c__Gammaproteobacteria;o__Burkholderiales;f__Gallionellaceae;g__39-52-133;s__	GCA_002278935.1	79.4997	0.52	Presence
SLM_LV1_0830-N11	0.8~3.0 um	SAMN40275224	JBCKTZ000000000	10829733	10323684	10321758	10321750	494813	1429245	61.3344	83	91514	25463	0.509784	66.6308	0.119048	1455	0.866518	d__Bacteria;p__Proteobacteria;c__Gammaproteobacteria;o__Burkholderiales;f__Gallionellaceae;g__39-52-133;s__	2.14502e+06	d__Bacteria;p__Proteobacteria;c__Gammaproteobacteria;o__Burkholderiales;f__Gallionellaceae;g__39-52-133;s__	GCA_002278935.1	79.6195	0.49	Presence
SLM_LV1_0208-D04	0.2~0.8 um	SAMN40275225	JBCKUA000000000	7212518	6671279	6665018	6665008	100274	270727	61.8121	28	42773	18071	0.511567	20.6897	0	288	0.865521	d__Bacteria;p__Proteobacteria;c__Gammaproteobacteria;o__Burkholderiales;f__Gallionellaceae;g__39-52-133;s__	1.30851e+06	d__Bacteria;p__Proteobacteria;c__Gammaproteobacteria;o__Burkholderiales;f__Gallionellaceae;g__39-52-133;s__				Absence
SLM_LV1_30a-G22	>3.0 um	SAMN40275226	JBCKUB000000000	8416229	7907623	7904880	7904876	256886	686678	65.5289	77	40157	13079	0.511043	30.9753	1.4218	733	0.878498	d__Bacteria;p__Proteobacteria;c__Gammaproteobacteria;o__Burkholderiales;f__Gallionellaceae;g__39-52-133;s__	2.21685e+06	d__Bacteria;p__Proteobacteria;c__Gammaproteobacteria;o__Burkholderiales;f__Gallionellaceae;g__39-52-133;s__	GCA_002278935.1	79.8882	0.52	Absence
SLM_LV1_30a-O22	>3.0 um	SAMN40275227	JBCKUC000000000	10121923	9475762	9474333	9474328	224008	649071	58.8018	88	25034	9781	0.503033	39.6552	1.72414	678	0.882124	d__Bacteria;p__Proteobacteria;c__Gammaproteobacteria;o__Burkholderiales;f__Gallionellaceae;g__39-52-133;s__	1.63679e+06	d__Bacteria;p__Proteobacteria;c__Gammaproteobacteria;o__Burkholderiales;f__Gallionellaceae;g__39-52-133;s__	GCA_002278935.1	79.4459	0.48	Absence
SLM_LV1_0830-P18	0.8~3.0 um	SAMN40275228	JBCKUD000000000	7989149	7518309	7513587	7513463	384601	1063588	61.5369	111	46909	13018	0.502589	30.9985	0	1107	0.880952	d__Bacteria;p__Proteobacteria;c__Gammaproteobacteria;o__Burkholderiales;f__Gallionellaceae;g__39-52-133;s__	3.4311e+06	d__Bacteria;p__Proteobacteria;c__Gammaproteobacteria;o__Burkholderiales;f__Gallionellaceae;g__39-52-133;s__	GCA_002278935.1	79.1429	0.39	Absence
SLM_LV1_0830-M22	0.8~3.0 um	SAMN40275229	JBCKUE000000000	7451291	7040826	7038738	7038732	400610	1162222	61.9357	136	68847	11514	0.517569	34.9926	0.952381	1174	0.866783	d__Bacteria;p__Proteobacteria;c__Gammaproteobacteria;o__Burkholderiales;f__Gallionellaceae;g__39-52-133;s__	3.32134e+06	d__Bacteria;p__Proteobacteria;c__Gammaproteobacteria;o__Burkholderiales;f__Gallionellaceae;g__39-52-133;s__	GCA_002278935.1	80.2358	0.44	Absence
SLM_LV1_0830-O14	0.8~3.0 um	SAMN40275230	JBCKUF000000000	6802039	6433753	6432731	6432708	320140	833264	67.2438	69	59747	18301	0.48467	40.137	0.502646	836	0.876112	d__Bacteria;p__Proteobacteria;c__Gammaproteobacteria;o__Burkholderiales;f__Gallionellaceae;g__39-52-133;s__	2.07605e+06	d__Bacteria;p__Proteobacteria;c__Gammaproteobacteria;o__Burkholderiales;f__Gallionellaceae;g__39-52-133;s__	GCF_000746095.1	79.1733	0.08	Presence
SLM_LV1_0830-A13	0.8~3.0 um	SAMN40275231	JBCKUG000000000	9926739	9401052	9397261	9397133	392954	998904	67.2367	79	44868	18502	0.557479	39.6552	0	1024	0.892027	d__Bacteria;p__Proteobacteria;c__Gammaproteobacteria;o__Burkholderiales;f__RBG-16-58-11;g__RBG-16-58-11;s__	2.51898e+06	d__Bacteria;p__Proteobacteria;c__Gammaproteobacteria;o__Burkholderiales;f__RBG-16-58-11;g__RBG-16-58-11;s__	GCA_001770235.1	85.7349	0.52	Absence
SLM_LV1_0208-A21	0.2~0.8 um	SAMN40275232	JBCKUH000000000	9063760	8492696	8490476	8490470	177952	455875	66.2246	58	39105	11441	0.501076	8.33333	0	526	0.897584	d__Bacteria;p__Proteobacteria;c__Gammaproteobacteria;o__Burkholderiales;f__Methylophilaceae;g__JABFRO01;s__	5.4705e+06	d__Bacteria;p__Proteobacteria;c__Gammaproteobacteria;o__Burkholderiales;f__Methylophilaceae;g__JABFRO01;s__				Absence
SLM_LV1_0208-P02	0.2~0.8 um	SAMN40275233	JBCKUI000000000	7625937	7187628	7186195	7185996	327810	820896	70.9657	58	64346	23876	0.508621	36.2069	0	872	0.895375	d__Bacteria;p__Proteobacteria;c__Gammaproteobacteria;o__Burkholderiales;f__Methylophilaceae;g__JADGRN01;s__	2.26724e+06	d__Bacteria;p__Proteobacteria;c__Gammaproteobacteria;o__Burkholderiales;f__Methylophilaceae;g__JADGRN01;s__	GCF_000384375.1	79.007	0.09	Presence
SLM_LV1_0830-K23	0.8~3.0 um	SAMN40275234	JBCKUJ000000000	8774443	8207036	8204935	8204913	250235	630188	69.854	62	34645	14236	0.502084	24.1379	1.72414	698	0.893237	d__Bacteria;p__Proteobacteria;c__Gammaproteobacteria;o__Burkholderiales;f__Methylophilaceae;g__JADGRN01;s__	2.61078e+06	d__Bacteria;p__Proteobacteria;c__Gammaproteobacteria;o__Burkholderiales;f__Methylophilaceae;g__JADGRN01;s__	GCF_003730115.1	78.0549	0.18	Presence
SLM_MC1B_02-C23	0~2 cm	SAMN40275235	JBCKUK000000000	7053159	6545302	6544284	6544251	566988	1569364	64.4548	91	95768	31796	0.506788	85.9076	1.7094	1742	0.903133	d__Bacteria;p__Proteobacteria;c__Gammaproteobacteria;o__Burkholderiales;f__Methylophilaceae;g__JABFRO01;s__	1.8268e+06	d__Bacteria;p__Proteobacteria;c__Gammaproteobacteria;o__Burkholderiales;f__Methylophilaceae;g__JABFRO01;s__	GCF_002234375.1	80.5346	0	Presence
SLM_MC1B_02-G15	0~2 cm	SAMN40275236	JBCKUL000000000	7086429	6676697	6675806	6675806	269596	762066	61.8807	56	74622	19997	0.503302	40.6749	0	829	0.908001	d__Bacteria;p__Proteobacteria;c__Gammaproteobacteria;o__Burkholderiales;f__Methylophilaceae;g__JABFRO01;s__	1.87355e+06	d__Bacteria;p__Proteobacteria;c__Gammaproteobacteria;o__Burkholderiales;f__Methylophilaceae;g__JABFRO01;s__	GCA_017880825.1	77.888	0.27	Absence
SLM_LV1_30a-M09	>3.0 um	SAMN40275237	JBCKUM000000000	9453563	8925588	8923708	8923704	241922	650758	63.559	66	41567	16044	0.451472	18.9655	0	740	0.90334	d__Bacteria;p__Proteobacteria;c__Gammaproteobacteria;o__Burkholderiales;f__Methylophilaceae;g__Methylotenera_A;s__	3.43127e+06	d__Bacteria;p__Proteobacteria;c__Gammaproteobacteria;o__Burkholderiales;f__Methylophilaceae;g__Methylotenera_A;s__	GCA_002083635.1	77.1555	0.3	Absence
SLM_LV1_0830-C07	0.8~3.0 um	SAMN40275238	JBCKUN000000000	6963591	6566138	6564783	6563980	256109	657821	68.25	77	41310	12931	0.458926	33.0721	0	738	0.84746	d__Bacteria;p__Proteobacteria;c__Gammaproteobacteria;o__Burkholderiales;f__Methylophilaceae;g__Methylotenera;s__	1.98905e+06	d__Bacteria;p__Proteobacteria;c__Gammaproteobacteria;o__Burkholderiales;f__Methylophilaceae;g__Methylotenera;s__	GCF_000384255.1	79.0055	0.38	Absence
SLM_LV1_0208-C10	0.2~0.8 um	SAMN40275239	JBCKUO000000000	7259202	6819947	6818238	6818225	317529	839302	65.1272	88	40355	13128	0.443732	40.7263	0	855	0.865273	d__Bacteria;p__Proteobacteria;c__Gammaproteobacteria;o__Burkholderiales;f__Methylophilaceae;g__JACMMS01;s__	2.06084e+06	d__Bacteria;p__Proteobacteria;c__Gammaproteobacteria;o__Burkholderiales;f__Methylophilaceae;g__JACMMS01;s__	GCA_018657165.1	83.5587	0.02	Presence
SLM_LV1_0830-C18	0.8~3.0 um	SAMN40275240	JBCKUP000000000	9610027	9097817	9095861	9095328	263518	813149	61.3481	52	67306	30485	0.446116	57.3668	3.44828	779	0.885627	d__Bacteria;p__Proteobacteria;c__Gammaproteobacteria;o__Burkholderiales;f__Methylophilaceae;g__JACMMS01;s__	1.41746e+06	d__Bacteria;p__Proteobacteria;c__Gammaproteobacteria;o__Burkholderiales;f__Methylophilaceae;g__JACMMS01;s__	GCF_018688095.1	82.2415	0.02	Presence
SLM_MC1B_68-K21	6~8 cm	SAMN40275241	JBCKUQ000000000	6697407	6343143	6341527	6341465	291242	777758	61.4685	98	25367	12108	0.590856	29.3103	0	844	0.882939	d__Bacteria;p__Proteobacteria;c__Gammaproteobacteria;o__Burkholderiales;f__Methylophilaceae;g__CAIJXJ01;s__	2.65353e+06	d__Bacteria;p__Proteobacteria;c__Gammaproteobacteria;o__Burkholderiales;f__Methylophilaceae;g__CAIJXJ01;s__	GCF_007559025.1	81.9299	0.01	Presence
SLM_LV1_0830-D02	0.8~3.0 um	SAMN40275242	JBCKUR000000000	8538073	8010404	8002115	8002069	75814	195856	63.1902	34	15896	6978	0.58977	14.5768	0	238	0.873504	d__Bacteria;p__Proteobacteria;c__Gammaproteobacteria;o__SURF-13;f__SURF-13;g__SURF-13;s__	1.34361e+06	d__Bacteria;p__Proteobacteria;c__Gammaproteobacteria;o__SURF-13;f__SURF-13;g__SURF-13;s__	GCA_003599485.1	85.766	0.57	Absence
SLM_LV1_30a-E07	>3.0 um	SAMN40275243	JBCKUS000000000	6901253	6447620	6444522	6444270	227092	575048	68.4285	65	46428	11576	0.590497	16.3793	0	637	0.871759	d__Bacteria;p__Proteobacteria;c__Gammaproteobacteria;o__SURF-13;f__SURF-13;g__SURF-13;s__	3.51082e+06	d__Bacteria;p__Proteobacteria;c__Gammaproteobacteria;o__SURF-13;f__SURF-13;g__SURF-13;s__	GCA_003599485.1	85.7106	0.56	Presence
SLM_LV1_0208-L23	0.2~0.8 um	SAMN40275244	JBCKUT000000000	9264433	8737177	8730437	8730225	286290	763731	64.7922	68	57824	14133	0.577092	18.9655	0	832	0.889784	d__Bacteria;p__Proteobacteria;c__Gammaproteobacteria;o__SURF-13;f__SURF-13;g__SURF-13;s__	4.02695e+06	d__Bacteria;p__Proteobacteria;c__Gammaproteobacteria;o__SURF-13;f__SURF-13;g__SURF-13;s__	GCA_003599485.1	86.0949	0.57	Absence
SLM_LV1_0208-A20	0.2~0.8 um	SAMN40275245	JBCKUU000000000	9271739	8657842	8651528	8651519	181505	426498	67.0683	59	29311	9102	0.592849	18.2616	0.528169	497	0.890161	d__Bacteria;p__Proteobacteria;c__Gammaproteobacteria;o__SURF-13;f__SURF-13;g__SURF-13;s__	2.33549e+06	d__Bacteria;p__Proteobacteria;c__Gammaproteobacteria;o__SURF-13;f__SURF-13;g__SURF-13;s__	GCA_003599485.1	85.5974	0.59	Absence
SLM_LV1_0830-J02	0.8~3.0 um	SAMN40275246	JBCKUV000000000	9345701	8738482	8732563	8732532	246291	660558	65.1562	51	61550	16540	0.597633	33.0157	0.381455	727	0.894513	d__Bacteria;p__Proteobacteria;c__Gammaproteobacteria;o__SURF-13;f__SURF-13;g__SURF-13;s__	2.00074e+06	d__Bacteria;p__Proteobacteria;c__Gammaproteobacteria;o__SURF-13;f__SURF-13;g__SURF-13;s__	GCA_003599485.1	86.4247	0.65	Absence
SLM_MC1B_02-B17	0~2 cm	SAMN40275247	JBCKUW000000000	7158917	6692792	6688767	6688753	226897	614077	66.0298	39	73299	29026	0.598329	36.0842	0	614	0.904224	d__Bacteria;p__Proteobacteria;c__Gammaproteobacteria;o__SURF-13;f__SURF-13;g__SURF-13;s__	1.70179e+06	d__Bacteria;p__Proteobacteria;c__Gammaproteobacteria;o__SURF-13;f__SURF-13;g__SURF-13;s__	GCA_003599485.1	86.1976	0.74	Absence
SLM_LV1_0208-D16	0.2~0.8 um	SAMN40275248	JBCKUX000000000	10764965	10125620	10119753	10119217	141490	311941	70.2178	48	16633	7744	0.596917	14.0001	0	347	0.864587	d__Bacteria;p__Proteobacteria;c__Gammaproteobacteria;o__SURF-13;f__SURF-13;g__SURF-13;s__	2.22813e+06	d__Bacteria;p__Proteobacteria;c__Gammaproteobacteria;o__SURF-13;f__SURF-13;g__SURF-13;s__	GCA_003599485.1	86.4122	0.62	Presence
SLM_LV1_0208-J20	0.2~0.8 um	SAMN40275249	JBCKUY000000000	11117279	10613101	10556812	10556519	113149	316572	62.1175	36	29176	11864	0.602628	10	0	360	0.885745	d__Bacteria;p__Proteobacteria;c__Gammaproteobacteria;o__SURF-13;f__SURF-13;g__SURF-13;s__	3165720	d__Bacteria;p__Proteobacteria;c__Gammaproteobacteria;o__SURF-13;f__SURF-13;g__SURF-13;s__	GCA_003599485.1	85.2126	0.7	Absence
SLM_LV1_0208-P05	0.2~0.8 um	SAMN40275250	JBCKUZ000000000	9835814	9349462	9346210	9345953	260144	722190	59.9931	92	63077	11990	0.600024	40.4966	0	836	0.891304	d__Bacteria;p__Proteobacteria;c__Gammaproteobacteria;o__SURF-13;f__SURF-13;g__SURF-13;s__	1.78334e+06	d__Bacteria;p__Proteobacteria;c__Gammaproteobacteria;o__SURF-13;f__SURF-13;g__SURF-13;s__	GCA_003599485.1	85.8949	0.65	Presence
SLM_LV1_0830-C22	0.8~3.0 um	SAMN40275251	JBCKVA000000000	9361798	8883197	8878092	8877924	378856	1047884	63.7226	68	80001	24460	0.599058	55.2404	0.880282	1128	0.883432	d__Bacteria;p__Proteobacteria;c__Gammaproteobacteria;o__SURF-13;f__SURF-13;g__SURF-13;s__	1.89695e+06	d__Bacteria;p__Proteobacteria;c__Gammaproteobacteria;o__SURF-13;f__SURF-13;g__SURF-13;s__	GCA_003599485.1	86.1255	0.68	Presence
SLM_LV1_0208-L22	0.2~0.8 um	SAMN40275252	JBCKVB000000000	9424094	8873839	8855773	8855766	589755	1380963	76.3681	78	79721	29059	0.597351	71.2534	1.59624	1476	0.886091	d__Bacteria;p__Proteobacteria;c__Gammaproteobacteria;o__SURF-13;f__SURF-13;g__SURF-13;s__	1.9381e+06	d__Bacteria;p__Proteobacteria;c__Gammaproteobacteria;o__SURF-13;f__SURF-13;g__SURF-13;s__	GCA_003599485.1	86.0355	0.65	Presence
SLM_LV1_0208-A06	0.2~0.8 um	SAMN40275253	JBCKVC000000000	8306744	7698486	7688724	7688710	155967	396458	66.762	53	23495	10616	0.59009	18.4953	0	474	0.87573	d__Bacteria;p__Proteobacteria;c__Gammaproteobacteria;o__SURF-13;f__SURF-13;g__SURF-13;s__	2.14356e+06	d__Bacteria;p__Proteobacteria;c__Gammaproteobacteria;o__SURF-13;f__SURF-13;g__SURF-13;s__	GCA_003599485.1	84.8076	0.61	Absence
SLM_MC1B_02-B13	0~2 cm	SAMN40275254	JBCKVD000000000	7156978	6641342	6635515	6635502	477073	1183270	71.1052	73	122253	28040	0.600892	62.0949	0.0320102	1242	0.89311	d__Bacteria;p__Proteobacteria;c__Gammaproteobacteria;o__SURF-13;f__SURF-13;g__SURF-13;s__	1.90558e+06	d__Bacteria;p__Proteobacteria;c__Gammaproteobacteria;o__SURF-13;f__SURF-13;g__SURF-13;s__	GCF_013284055.1	87.5498	0.01	Presence
SLM_LV1_0208-E07	0.2~0.8 um	SAMN40275255	JBCKVE000000000	10936393	10116742	10112019	10111966	212010	572136	65.139	41	67624	26600	0.590886	29.6309	0	628	0.899069	d__Bacteria;p__Proteobacteria;c__Gammaproteobacteria;o__SURF-13;f__SURF-13;g__SURF-13;s__	1.93088e+06	d__Bacteria;p__Proteobacteria;c__Gammaproteobacteria;o__SURF-13;f__SURF-13;g__SURF-13;s__	GCA_003599485.1	85.9192	0.58	Absence
SLM_LV1_30a-E13	>3.0 um	SAMN40275256	JBCKVF000000000	10060039	9599591	9595491	9595457	165055	397089	68.344	61	25355	8994	0.598893	20.5537	0.0880282	444	0.907147	d__Bacteria;p__Proteobacteria;c__Gammaproteobacteria;o__SURF-13;f__SURF-13;g__SURF-13;s__	1.93196e+06	d__Bacteria;p__Proteobacteria;c__Gammaproteobacteria;o__SURF-13;f__SURF-13;g__SURF-13;s__	GCA_003599485.1	85.9348	0.69	Absence
SLM_LV1_0830-M02	0.8~3.0 um	SAMN40275257	JBCKVG000000000	8147114	7609387	7582765	7582568	52019	130699	66.1132	16	26248	8419	0.611818	0	0	145	0.899357	d__Bacteria;p__Proteobacteria;c__Gammaproteobacteria;o__SURF-13;f__SURF-13;g__SURF-13;s__	#DIV/0!	d__Bacteria;p__Proteobacteria;c__Gammaproteobacteria;o__SURF-13;f__SURF-13;g__SURF-13;s__	GCA_003599485.1	86.6434	0.7	Absence
SLM_LV1_30a-P04	>3.0 um	SAMN40275258	JBCKVH000000000	7334175	6933780	6929575	6929568	187648	470625	67.9317	62	31699	10305	0.58761	20.2369	0.352113	562	0.85573	d__Bacteria;p__Proteobacteria;c__Gammaproteobacteria;o__SURF-13;f__SURF-13;g__SURF-13;s__	2.32558e+06	d__Bacteria;p__Proteobacteria;c__Gammaproteobacteria;o__SURF-13;f__SURF-13;g__SURF-13;s__	GCA_003599485.1	86.173	0.65	Presence
SLM_LV1_0208-F11	0.2~0.8 um	SAMN40275259	JBCKVI000000000	7245959	6836109	6821668	6821571	270528	761826	62.4864	50	48561	25586	0.592608	37.6505	0.117371	860	0.884652	d__Bacteria;p__Proteobacteria;c__Gammaproteobacteria;o__SURF-13;f__SURF-13;g__SURF-13;s__	2.02341e+06	d__Bacteria;p__Proteobacteria;c__Gammaproteobacteria;o__SURF-13;f__SURF-13;g__SURF-13;s__	GCA_003599485.1	85.7991	0.61	Absence
SLM_LV1_0208-D19	0.2~0.8 um	SAMN40275260	JBCKVJ000000000	8233810	7715186	7713451	7713421	139331	388622	61.3331	44	35626	12638	0.590206	20.0286	0	441	0.875511	d__Bacteria;p__Proteobacteria;c__Gammaproteobacteria;o__SURF-13;f__SURF-13;g__SURF-13;s__	1.94033e+06	d__Bacteria;p__Proteobacteria;c__Gammaproteobacteria;o__SURF-13;f__SURF-13;g__SURF-13;s__	GCA_003599485.1	85.4067	0.63	Presence
SLM_LV1_0830-G02	0.8~3.0 um	SAMN40275261	JBCKVK000000000	10415895	9736537	9734607	9734529	145375	452431	56.8099	41	57093	17056	0.595879	24.8575	0	527	0.891504	d__Bacteria;p__Proteobacteria;c__Gammaproteobacteria;o__SURF-13;f__SURF-13;g__SURF-13;s__	1.8201e+06	d__Bacteria;p__Proteobacteria;c__Gammaproteobacteria;o__SURF-13;f__SURF-13;g__SURF-13;s__	GCA_003599485.1	85.9102	0.7	Absence
SLM_LV1_30a-P14	>3.0 um	SAMN40275262	JBCKVL000000000	9380986	8744448	8738203	8738050	166331	342591	70.2426	68	15748	5720	0.596189	18.9655	0	420	0.8861	d__Bacteria;p__Proteobacteria;c__Gammaproteobacteria;o__SURF-13;f__SURF-13;g__SURF-13;s__	1.80639e+06	d__Bacteria;p__Proteobacteria;c__Gammaproteobacteria;o__SURF-13;f__SURF-13;g__SURF-13;s__	GCA_003599485.1	85.6533	0.73	Presence
SLM_LV1_0830-L15	0.8~3.0 um	SAMN40275263	JBCKVM000000000	8553939	8029357	8023198	8023173	296558	740843	67.9892	67	40888	16642	0.596684	32.9469	0.685886	841	0.881494	d__Bacteria;p__Proteobacteria;c__Gammaproteobacteria;o__SURF-13;f__SURF-13;g__SURF-13;s__	2.2486e+06	d__Bacteria;p__Proteobacteria;c__Gammaproteobacteria;o__SURF-13;f__SURF-13;g__SURF-13;s__	GCA_003599485.1	86.1537	0.58	Presence
SLM_LV1_0830-K02	0.8~3.0 um	SAMN40275264	JBCKVN000000000	7444381	6880635	6877613	6876797	155247	368427	72.2294	36	28108	15489	0.589984	20.6897	0	435	0.874431	d__Bacteria;p__Proteobacteria;c__Gammaproteobacteria;o__SURF-13;f__SURF-13;g__SURF-13;s__	1.78073e+06	d__Bacteria;p__Proteobacteria;c__Gammaproteobacteria;o__SURF-13;f__SURF-13;g__SURF-13;s__	GCA_003599485.1	85.9302	0.63	Absence
SLM_LV1_0208-M23	0.2~0.8 um	SAMN40275265	JBCKVO000000000	7970437	7499199	7493193	7493183	288928	820981	67.7669	50	62525	26659	0.598658	43.1034	0	872	0.886939	d__Bacteria;p__Proteobacteria;c__Gammaproteobacteria;o__SURF-13;f__SURF-13;g__SURF-13;s__	1.90468e+06	d__Bacteria;p__Proteobacteria;c__Gammaproteobacteria;o__SURF-13;f__SURF-13;g__SURF-13;s__	GCA_003599485.1	84.3712	0.64	Absence
SLM_LV1_30a-M02	>3.0 um	SAMN40275266	JBCKVP000000000	7063309	6629859	6618162	6618140	275977	725069	64.3638	63	37463	20282	0.591403	34.4875	0.352113	787	0.897584	d__Bacteria;p__Proteobacteria;c__Gammaproteobacteria;o__SURF-13;f__SURF-13;g__SURF-13;s__	2.10241e+06	d__Bacteria;p__Proteobacteria;c__Gammaproteobacteria;o__SURF-13;f__SURF-13;g__SURF-13;s__	GCA_003599485.1	84.7086	0.64	Absence
SLM_LV1_0208-D03	0.2~0.8 um	SAMN40275267	JBCKVQ000000000	9869516	9242224	9237688	9237559	297796	751632	67.5569	66	32798	17906	0.589097	28.6207	0	802	0.869692	d__Bacteria;p__Proteobacteria;c__Gammaproteobacteria;o__SURF-13;f__SURF-13;g__SURF-13;s__	2.62618e+06	d__Bacteria;p__Proteobacteria;c__Gammaproteobacteria;o__SURF-13;f__SURF-13;g__SURF-13;s__	GCF_003544895.1	85.2408	0.01	Presence
SLM_LV1_0208-J06	0.2~0.8 um	SAMN40275268	JBCKVR000000000	10161259	9549806	9542568	9542457	250565	672285	65.5337	44	71063	23721	0.598742	27.5862	0	697	0.905788	d__Bacteria;p__Proteobacteria;c__Gammaproteobacteria;o__SURF-13;f__SURF-13;g__SURF-13;s__	2.43703e+06	d__Bacteria;p__Proteobacteria;c__Gammaproteobacteria;o__SURF-13;f__SURF-13;g__SURF-13;s__	GCA_003599485.1	85.3634	0.63	Absence
SLM_MC1B_68-O04	6~8 cm	SAMN40275269	JBCKVS000000000	10401334	9844075	9837398	9837392	597176	1648311	62.2886	81	105331	32311	0.635372	45.4365	0.744767	1664	0.918304	d__Bacteria;p__Proteobacteria;c__Gammaproteobacteria;o__Steroidobacterales;f__Steroidobacteraceae;g__SCUD01;s__	3.62772e+06	d__Bacteria;p__Proteobacteria;c__Gammaproteobacteria;o__Steroidobacterales;f__Steroidobacteraceae;g__SCUD01;s__	GCA_009692245.1	85.5067	0.41	Presence
SLM_LV1_0208-N18	0.2~0.8 um	SAMN40275270	JBCKVT000000000	8844855	8263994	8262745	8262227	459372	1251221	62.7877	137	38243	14399	0.514724	26.0188	0	1276	0.875781	d__Bacteria;p__Proteobacteria;c__Gammaproteobacteria;o__Pseudomonadales;f__Pseudohongiellaceae;g__NORP240;s__	4.80891e+06	d__Bacteria;p__Proteobacteria;c__Gammaproteobacteria;o__Pseudomonadales;f__Pseudohongiellaceae;g__NORP240;s__				Presence
SLM_LV1_0830-A21	0.8~3.0 um	SAMN40275271	JBCKVU000000000	8022332	7532688	7530193	7530115	291858	757611	67.14	97	35945	10064	0.511079	32.7586	1.72414	782	0.887154	d__Bacteria;p__Proteobacteria;c__Gammaproteobacteria;o__Pseudomonadales;f__Pseudohongiellaceae;g__NORP240;s__	2.31271e+06	d__Bacteria;p__Proteobacteria;c__Gammaproteobacteria;o__Pseudomonadales;f__Pseudohongiellaceae;g__NORP240;s__				Absence
SLM_LV1_0208-A09	0.2~0.8 um	SAMN40275272	JBCKVV000000000	8004511	7564040	7563409	7563396	189512	528319	60.6039	63	28769	11044	0.507847	17.2414	0	534	0.902114	d__Bacteria;p__Proteobacteria;c__Gammaproteobacteria;o__Pseudomonadales;f__Pseudohongiellaceae;g__NORP240;s__	3.06425e+06	d__Bacteria;p__Proteobacteria;c__Gammaproteobacteria;o__Pseudomonadales;f__Pseudohongiellaceae;g__NORP240;s__				Absence
SLM_LV1_30a-P15	>3.0 um	SAMN40275273	JBCKVW000000000	6803287	6430649	6428995	6428992	158126	454615	57.4052	73	27296	7224	0.50913	18.2759	0	507	0.877679	d__Bacteria;p__Proteobacteria;c__Gammaproteobacteria;o__Pseudomonadales;f__Pseudohongiellaceae;g__NORP240;s__	2.48752e+06	d__Bacteria;p__Proteobacteria;c__Gammaproteobacteria;o__Pseudomonadales;f__Pseudohongiellaceae;g__NORP240;s__				Absence
SLM_LV1_0830-P06	0.8~3.0 um	SAMN40275274	JBCKVX000000000	7483435	7060032	7059291	7059288	188696	479704	62.3124	85	18846	6592	0.50804	18.9655	0	530	0.880837	d__Bacteria;p__Proteobacteria;c__Gammaproteobacteria;o__Pseudomonadales;f__Pseudohongiellaceae;g__NORP240;s__	2.52935e+06	d__Bacteria;p__Proteobacteria;c__Gammaproteobacteria;o__Pseudomonadales;f__Pseudohongiellaceae;g__NORP240;s__				Absence
SLM_LV1_0830-J21	0.8~3.0 um	SAMN40275275	JBCKVY000000000	6992262	6530016	6528968	6528554	177563	462099	63.6795	57	41940	10592	0.510466	12.6657	0	474	0.88884	d__Bacteria;p__Proteobacteria;c__Gammaproteobacteria;o__Pseudomonadales;f__Pseudohongiellaceae;g__NORP240;s__	3.64842e+06	d__Bacteria;p__Proteobacteria;c__Gammaproteobacteria;o__Pseudomonadales;f__Pseudohongiellaceae;g__NORP240;s__				Presence
SLM_LV1_30a-K18	>3.0 um	SAMN40275276	JBCKVZ000000000	8580664	8137932	8136872	8136868	348295	876021	66.6574	92	39565	14657	0.506882	18.9655	0	923	0.877682	d__Bacteria;p__Proteobacteria;c__Gammaproteobacteria;o__Pseudomonadales;f__Pseudohongiellaceae;g__NORP240;s__	4.61902e+06	d__Bacteria;p__Proteobacteria;c__Gammaproteobacteria;o__Pseudomonadales;f__Pseudohongiellaceae;g__NORP240;s__				Presence
SLM_LV1_0830-I05	0.8~3.0 um	SAMN40275277	JBCKWA000000000	10387882	9834114	9829176	9829172	449014	1169119	63.1722	160	33953	8745	0.599466	36.2069	0	1267	0.88482	d__Bacteria;p__Proteobacteria;c__Gammaproteobacteria;o__Pseudomonadales;f__Pseudohongiellaceae;g__CAILUG01;s__	3.229e+06	d__Bacteria;p__Proteobacteria;c__Gammaproteobacteria;o__Pseudomonadales;f__Pseudohongiellaceae;g__CAILUG01;s__	GCF_014873375.1	85.854	0	Presence
SLM_LV1_0830-O10	0.8~3.0 um	SAMN40275278	JBCKWB000000000	11703816	11150920	11145703	11145696	303889	722089	65.9661	114	31653	8147	0.593164	31.9654	0	792	0.890279	d__Bacteria;p__Proteobacteria;c__Gammaproteobacteria;o__Pseudomonadales;f__Pseudohongiellaceae;g__CAILUG01;s__	2.25897e+06	d__Bacteria;p__Proteobacteria;c__Gammaproteobacteria;o__Pseudomonadales;f__Pseudohongiellaceae;g__CAILUG01;s__	GCA_009782025.1	77.8687	0.02	Absence
SLM_LV1_0830-F21	0.8~3.0 um	SAMN40275279	JBCKWC000000000	7604890	7190275	7188441	7188342	437560	1455926	48.4195	139	64437	18477	0.441969	45.1592	0	1470	0.904456	d__Bacteria;p__Proteobacteria;c__Gammaproteobacteria;o__Legionellales;f__Legionellaceae;g__DDPF01;s__	3.22399e+06	d__Bacteria;p__Proteobacteria;c__Gammaproteobacteria;o__Legionellales;f__Legionellaceae;g__DDPF01;s__	GCA_013289415.1	78.7805	0.24	Absence
SLM_LV1_30a-D15	>3.0 um	SAMN40275280	JBCKWD000000000	7056402	6620652	6619550	6619548	351759	955869	62.1358	129	39397	10606	0.439753	31.0345	3.44828	971	0.911437	d__Bacteria;p__Proteobacteria;c__Gammaproteobacteria;o__Legionellales;f__Legionellaceae;g__DDPF01;s__	3.08002e+06	d__Bacteria;p__Proteobacteria;c__Gammaproteobacteria;o__Legionellales;f__Legionellaceae;g__DDPF01;s__	GCA_013289415.1	78.497	0.21	Presence
SLM_LV1_30a-M11	>3.0 um	SAMN40275281	JBCKWE000000000	7166412	6740305	6738553	6738548	833989	1906380	74.7106	123	101693	30279	0.441973	58.6207	0	1828	0.91415	d__Bacteria;p__Proteobacteria;c__Gammaproteobacteria;o__Legionellales;f__Legionellaceae;g__DDPF01;s__	3.25206e+06	d__Bacteria;p__Proteobacteria;c__Gammaproteobacteria;o__Legionellales;f__Legionellaceae;g__DDPF01;s__	GCF_005405485.1	80.9297	0	Presence
SLM_MC1B_46-E17	4~6 cm	SAMN40275282	JBCKWF000000000	7203105	6788840	6787553	6787547	631225	1811183	59.5203	180	46575	15507	0.504776	54.3431	0.704225	1856	0.886348	d__Bacteria;p__Proteobacteria;c__Gammaproteobacteria;o__UBA4486;f__UBA4486;g__;s__	3.33286e+06	d__Bacteria;p__Proteobacteria;c__Gammaproteobacteria;o__UBA4486;f__UBA4486;g__;s__	GCF_003731635.1	87.8852	0	Presence
SLM_MC1B_24-B15	2~4 cm	SAMN40275283	JBCKWG000000000	7173926	6793716	6792703	6792627	734592	2021235	60.1243	213	52679	13641	0.501896	57.1245	0.176056	2015	0.888024	d__Bacteria;p__Proteobacteria;c__Gammaproteobacteria;o__UBA4486;f__UBA4486;g__;s__	3.5383e+06	d__Bacteria;p__Proteobacteria;c__Gammaproteobacteria;o__UBA4486;f__UBA4486;g__;s__	GCF_000612585.1	82.1805	0.01	Absence
SLM_MC1B_24-K04	2~4 cm	SAMN40275284	JBCKWH000000000	9232292	8651900	8649270	8649102	486620	1590607	50.6012	160	85356	16775	0.501242	43.0556	0.352113	1625	0.890947	d__Bacteria;p__Proteobacteria;c__Gammaproteobacteria;o__UBA4486;f__UBA4486;g__;s__	3.69431e+06	d__Bacteria;p__Proteobacteria;c__Gammaproteobacteria;o__UBA4486;f__UBA4486;g__;s__				Absence
SLM_MC1B_02-G04	0~2 cm	SAMN40275285	JBCKWI000000000	7299583	6907804	6904096	6904096	712738	1922473	65.7781	127	96712	27350	0.481128	70.5634	0.4611	2083	0.876651	d__Bacteria;p__Proteobacteria;c__Gammaproteobacteria;o__UBA4486;f__UBA4486;g__2-02-FULL-47-50;s__	2.72446e+06	d__Bacteria;p__Proteobacteria;c__Gammaproteobacteria;o__UBA4486;f__UBA4486;g__2-02-FULL-47-50;s__	GCA_001801885.1	88.4718	0.65	Presence
SLM_MC1B_02-I13	0~2 cm	SAMN40275286	JBCKWJ000000000	7814193	7361493	7359202	7359201	378952	1117278	58.854	96	41623	18444	0.481984	35.3448	0	1235	0.886539	d__Bacteria;p__Proteobacteria;c__Gammaproteobacteria;o__UBA4486;f__UBA4486;g__2-02-FULL-47-50;s__	3.16108e+06	d__Bacteria;p__Proteobacteria;c__Gammaproteobacteria;o__UBA4486;f__UBA4486;g__2-02-FULL-47-50;s__	GCA_001801885.1	88.6464	0.66	Absence
[truncated: 421 more rows]

## Sheet: Table S2
Supplementary Table 2. The number of genomes across samples every taxonomic group from domain to species.
[truncated: 688 more rows]

## Sheet: Table S3
Supplementary Table 3. Dictionary for defining the relationships between keywords and habitat flags. Keywords correspond to genomic isolation sources, and habitat flags are broad categories of habitats encompassing keywords. Searching keywords against genomic isiolation information was made in case-insensitive manner, dealing with plural forms.
[truncated: 20 more rows]

[truncated: 5 more sheets: Table S4, Table S5, Table S6, Table S7, Table S8]
