# Supplementary material for: Genetic isolation and metabolic complexity of an Antarctic subglacial microbiome
Source: Research Square preprint supplement (doi:10.21203/rs.3.rs-4392950/v1), 2024-05-30
Supplement: Supplementary file 2 [file bd63882de0da3a24b58cc3eb.docx]

**Supplementary Text**

**Single-cell genomes recovered from SLM**

In late December 2018, an environmentally clean hot water drill system was used to melt a ~0.4 m diameter borehole through 1,087 m of ice to study SLM[1](#_ENREF_1). Particles in the water were concentrated and fractionated into four subsamples based on diameter (>3 µm, 3 to 0.8 µm, 0.8 to 0.2 µm, and <0.2 µm) using an *in-situ* filtering system. Five samples were collected from the top 10 cm of a sediment core (i.e. Unit I[2](#_ENREF_2)) that was split every 2 cm. In addition, bulk surface sediment collected by a sediment catcher attached to the base of the *in-situ* water filtration system were also analyzed. The cell concentration in the lake water (2.4 x 104 cells mL-1) and surficial sediments (2.6 x 106 cells g-1) were determined as previously described[2](#_ENREF_2). Owing to low concentrations of extractable DNA from the samples (0.70 ± 0.90 ng per extraction; ±SD), sequence libraries generated by NovaSeq 6000 sequencing (Illumina) assembled into a large number of short-length contigs with low sequence coverage[3](#_ENREF_3). To overcome this issue, we used a single-cell genomic approach.

From the four water and six sediment samples, a total of 3,170 droplets were sorted using flow cytometry[4](#_ENREF_4). DNA was successfully amplified from isolated cells 2,431 of the sorted droplets. After evaluating quality based on crossing point (Cp) values, 2,000 of the cells were selected for genome sequencing, which yielded an average of 8.94 million paired reads per cell (Supplementary Table 1). Filtering to remove reads of low-quality, of low-complexity, and identified as human DNA contamination discarded an average of 6% of the reads per cell. After discarding sequences affected by genome amplification bias[5](#_ENREF_5), 4.2% of the remaining reads (367,552 read pairs per cell on average) were retained. Of the 2,000 cells selected for genome sequencing, 605 failed to provide sufficient data for successful assembly or taxonomic classification of the sequences. Following removal of 21 SAGs that exhibit >5% CheckM contamination rate[6](#_ENREF_6), a total of 1,374 SAGs (618 from the water column and 756 from the sediment samples) were available for downstream analyses. After removing the foreign contaminated sequences using NCBI’s Foreign Contamination Screen tool suite[7](#_ENREF_7), the SAGs are composed of 79 ± 50 (average ± standard deviation) contigs with a read coverage of 65.2 ± 6.5 ×, length of 997,887 ± 608,779 bp, GC content of 57.1 ± 9.1%, CheckM completeness of 38.7 ± 18.8%, and CheckM contamination of 0.4% ± 0.7%.

**Detection of viral-like sequences in SAGs**

VirSorter that searches for viral hallmark genes and viral-like genes detected four phage contigs (4 SAGs) and two prophage-containing contigs (2 SAGs) as the most confident predictions[8](#_ENREF_8). The less confident prediction of VirSorter yielded 98 phage contigs and 50 prophages from 89 SAGs and 49 SAGs, respectively. Except for five phage contigs and three prophages, all of the phage contigs and prophages contain viral hallmark genes and viral-like genes that classified within *Caudovirales*. In addition, CRISPR spacer sequences were detected in 854 SAGs at an average frequency of 3.2 copies per SAG, providing direct evidence for past viral infection of SLM’s microbial populations.

**Comparison of SAG’s 16S RNA sequences with ASVs of SLM, SLW and WGZ**

The 13,022 amplicon sequence variants (ASV) derived from previous studies of SLM, SLW and Whillans Grounding Zone (WGZ)[2](#_ENREF_2) were compared to the 686 SAGs having 16S rRNA sequences >1,000 bp (Supplementary Table 1). Less than 15% of ASVs (1,280 of total) were shared between two or more sites (Supplementary Fig. 4a). Among the 686 SAGs, 16S rRNA gene sequences of 668 SAGs have ≥99% identity to 803 of the ASVs (616, 340, and 24 ASVs present in SLM, SLW and WGZ, respectively), 159 and 23 of the ASVs in SLM were also observed in SLW and WGZ, respectively, and 18 ASVs are shared in all samples (Supplementary Fig. 4b). Maximum likelihood analysis indicated close phylogenetic relationships among 16S rRNA sequences from the SAGs to the ASVs (Supplementary Fig. 5).

**Factors leading to different community structures between SAG and ASV datasets**

When 16S rRNA gene sequences of SAGs were compared with amplicon data from SLM, SLW and WGZ samples[2](#_ENREF_2), taxa vary in composition and in abundance between the method (Supplementary Fig. 2b-c). This difference appeared prominently in the genera *Thiobacllius* and *Sideroxydans*. The genus *Thiobacillus* (6.43% of total ASVs) were among the most abundant taxa in sediments of SLM, while none of the SAGs possessed 16S rRNA sequences similar to *Thiobacillus* ASVs nor even belonged to *f__Thiobacillaceae* in the GTDB taxonomy. This difference would be attributed to inherent technical bias of both 16S rRNA gene amplification and single-cell genomics (see details in Results). In addition, the *Thiobacillus* ASVs were absent or rare in 13 of 58 sediment samples of SLM, indicating that the taxon composition can vary largely across samples. Therefore, the differential community structure between SAGs and ASVs would also partly results from sampling bias.

The incongruence of taxonomic composition between SAG and ASV datasets may results from the limited taxonomic resolution, as ASVs are the V4 region (~250 bp in length) of the 16S rRNA gene. For example, the *Sideroxydans* taxa (2.18% of total ASVs in SLM) that have been considered dominant in Antarctic subglacial environments[2](#_ENREF_2) were not present in the GTDB taxonomy of SAG (Supplementary Table 1). The phylogenetic tree of the V4 sequences showed that the ASVs of *Sideroxydans* were divided into three distant groups (Supplementary Fig. 5), indicating that the short ASV sequences are unlikely sufficient for accurate taxonomic assignment of these closely related sequences.

**Genetic heterogeneity among SAGs of the same species**

The KEGG orthologs (KOs) of closely related SAGs were examined to evaluate gene content within divergent microbial populations considered to belonging to the same species taxon. For this comparison, we first defined the null hypothesis as follow: any strains belonging to the same species should possess the same gene content when their complete genomes were compared. By surveying our single cell genomes, we found that the three genomes of *g__F1-60-MAGs149* is most suitable for this test. The genomes are similar each other with >98% ANI and that are >87% complete (SLM_LV1_BS-J08 of 87.1% CheckM completeness, SLM_MC1B_46-P03 of 90.4%, and SLM_MC1B_24-O19 of 90.9%; Supplementary Table 1). When the genome incompleteness was considered, the expected proportion of genes shared by the three genomes under the null hypothesis should be like a Venn diagram of Supplementary Fig. 9a. As a result, the observed proportion of genes shared by the genomes (52.3% in Supplementary Fig. 9b) was largely lower than the expected number (71.6%), rejecting the null hypothesis. Consequently, remarkable genetic heterogeneity exists among closely related genomes of the same species, which aligns well a general knowledge that a microbial species consists of a number of strains that vary in functional traits[9](#_ENREF_9). Therefore, we here analyzed individual genomes instead of the pan-genome analysis.

**Metabolic potential of mineralization in SLM**

Metabolic pathways for nitrogen mineralization were represented in 113.3% of the lake_SAGs and 151.5% of the sediment_SAGs. In particular, urea hydrolysis (*ureABC* or *URE;* 48.9% lake_SAGs and 61.8% sediment_SAGs), urea amidolyase (*UCA*-*atzF;* 10.6% and 23.3%), nitrile deamination (*NIT;* 8.0% and 35.4%), nitroalkane deamination (*ncd2*, 64.0% and 95.0%), glutamate deamination (*gltS* or *gudB;* 7.1% and 4.0%) and cyanide deamination (*cynS;* 7.1% and 2.8%) were identified in the SAG dataset. The potential for sulfur mineralization was exhibited by 95.6% of the lake_SAGs and 141.3% of the sediment_SAGs. Specifically, cysteine/cysteate deaminase (*dcyD* or *cuyA;* 12.4% and 20.8%), taurine dioxygenase (*tauD;* 32.9% and 10.6%), sulfatase (*betC* or *aslA;* 48.9% and 77.9%), and alkanesulfonate monooxygenase (*ssuD;* 16.9% and 49.7%), were observed in the SAG dataset.

**Inaccurate divergence time estimation resulting from differential generation-time**

Dating the evolutionary origins of these populations could be resolved by estimating the divergence time between the subglacial microorganisms and their closest non-subglacial neighbors. Relative to external biomes, microorganisms inhabiting low energy environments like Antarctic subglacial lakes are known to grow at a much slower pace[10](#_ENREF_10). The longer doubling time leads to slower DNA replication, which then produces the lower mutation rate[11](#_ENREF_11). Although it is technically feasible to use recent phylogenomic approaches to examine divergence times of taxonomic groups[12](#_ENREF_12), existing uncertainties on the reproduction and mutation rates in these subglacial populations make accurate estimates challenging.

**Nitrite oxidation is not exhibited by the *g__Nitrotoga***

The putative nitrite oxidase gene (*nxrA*) was identified in only 3 out of 108 *g__Nitrotoga* SAGs via KEGG annotation. Since *nxrA* is undistinguished from the nitrate reductase gene (*narG*) in a typical genome annotation (i.e., K00370 and Supplementary Table 6), we conducted a BLASTp sequence comparison. The result showed that these putative NxrA sequences are more similar to the NarG sequences of the nitrate reducer *Sulfuriferula multivorans TTN* (88% sequence similarity with WP_124703789.1) than to NxrA of the experimentally verified nitrifying *Candidatus* *Nitrotaga arctica 6680* (23% similarity with WP_239795842.1).

**References**

1 Priscu, J. C. *et al.* Scientific access into Mercer Subglacial Lake: scientific objectives, drilling operations and initial observations. *Annals of Glaciology*, 1-13 (2021). <https://doi.org/10.1017/aog.2021.10>

2 Davis, C. L. *et al.* Biogeochemical and historical drivers of microbial community composition and structure in sediments from Mercer Subglacial Lake, West Antarctica. *ISME communications* **3**, 8 (2023).

3 Davis, C. L. *Ecology of Subglacial Lake Microbial Communities in West Antarctica*. (University of Florida, 2022).

4 Stepanauskas, R. *et al.* Improved genome recovery and integrated cell-size analyses of individual uncultured microbial cells and viral particles. *Nat Commun* **8**, 84 (2017). <https://doi.org/10.1038/s41467-017-00128-z>

5 Bankevich, A. *et al.* SPAdes: a new genome assembly algorithm and its applications to single-cell sequencing. *Journal of computational biology* **19**, 455-477 (2012).

6 Parks, D. H., Imelfort, M., Skennerton, C. T., Hugenholtz, P. & Tyson, G. W. CheckM: assessing the quality of microbial genomes recovered from isolates, single cells, and metagenomes. *Genome research* **25**, 1043-1055 (2015).

7 Astashyn, A. *et al.* Rapid and sensitive detection of genome contamination at scale with FCS-GX. *bioRxiv* (2023). <https://doi.org/10.1101/2023.06.02.543519>

8 Roux, S., Enault, F., Hurwitz, B. L. & Sullivan, M. B. VirSorter: mining viral signal from microbial genomic data. *PeerJ* **3**, e985 (2015). <https://doi.org/10.7717/peerj.985>

9 Schloter, M., Lebuhn, M., Heulin, T. & Hartmann, A. Ecology and evolution of bacterial microdiversity. *FEMS microbiology reviews* **24**, 647-660 (2000).

10 Vick-Majors, T. J. *et al.* Physiological ecology of microorganisms in subglacial Lake Whillans. *Frontiers in microbiology* **7**, 1705 (2016).

11 Weller, C. & Wu, M. A generation-time effect on the rate of molecular evolution in bacteria. *Evolution* **69**, 643-652 (2015).

12 Albanese, D. *et al.* Pre-Cambrian roots of novel Antarctic cryptoendolithic bacterial lineages. *Microbiome* **9**, 1-15 (2021).
